# Supplementary material for: PM2.5 Spatiotemporal Variations and the Relationship with Meteorological Factors during 2013-2014 in Beijing, China
Source: PLoS One. 2015 Nov 3;10(11):e0141642. doi: 10.1371/journal.pone.0141642 (PMC4631325; doi:10.1371/journal.pone.0141642)
Supplement: S1 Database — (XLSX) [file pone.0141642.s001.xlsx]

## Sheet: PM2.5
date	station	PM2.5	precipitation	air pressure	wind speed	temperature	relative humidity	sunlight hours
130801	DongChengDongSi	213	20.14	0.9866	1.34	23.34	85.8	3.68
130802	DongChengDongSi	35	0.28	0.9887	1.44	25.1	80.6	6.48
130803	DongChengDongSi	43	0.68	0.9873	1.44	26.12	72	11.22
130804	DongChengDongSi	19	5.34	0.98408	1.76	26.48	77.4	7.92
130805	DongChengDongSi	46	9.66	0.98188	1.12	24.76	79.4	11.88
130806	DongChengDongSi	125	0	0.98278	1.12	27.94	82.4	3.9
130807	DongChengDongSi	89	27.8	0.98556	1.76	24.86	84.6	2
130808	DongChengDongSi	31	0.86	0.98426	1.7	26.1	77.2	9.2
130809	DongChengDongSi	50	0.08	0.98474	1.5	27.18	70	11.84
130810	DongChengDongSi	80	0	0.98814	1.48	28.6	75.2	9.2
130811	DongChengDongSi		9.14	0.98982	1.6	27.1	86.6	0.86
130812	DongChengDongSi		4.72	0.98864	1.5	25.52	85.4	4.28
130813	DongChengDongSi	67	0	0.9883	1.36	27.44	81.4	7.72
130814	DongChengDongSi	79	4.2	0.98774	1.68	27.48	79.4	8
130815	DongChengDongSi	81	0.08	0.98642	1.18	28.78	81.8	1.52
130816	DongChengDongSi	122	21.12	0.98148	1.7	28.06	85.4	1.7
130817	DongChengDongSi	143	0	0.98444	2.04	29.06	59	11.28
130818	DongChengDongSi	17	0	0.99124	1.8	27.1	53	11.32
130819	DongChengDongSi	21	0	0.9936	1.2	25.96	60.2	11.36
130820	DongChengDongSi	94	2.24	0.99272	1.34	25.54	71	3.84
130821	DongChengDongSi	113	0.44	0.99134	1.18	25.32	75.8	6.6
130822	DongChengDongSi	109	0.06	0.99216	0.96	23.74	81.6	1
130823	DongChengDongSi	100	0.02	0.99254	1.28	25.58	66.8	9
130824	DongChengDongSi	36	0	0.9927	1.4	25.66	61.4	10.12
130825	DongChengDongSi	38	0	0.99042	1.4	26.3	61.8	11.7
130826	DongChengDongSi	46	0	0.98914	1.86	26.38	61.6	11.02
130827	DongChengDongSi	66	1.3	0.99066	1.46	24.28	76.8	1.5
130828	DongChengDongSi	60	21.4	0.98372	1.36	23.1	88.4	0
130829	DongChengDongSi	68	0	0.98578	3.06	22.92	61.8	8.78
130830	DongChengDongSi	6	0.38	0.99494	2.16	20.86	55.2	10.58
130831	DongChengDongSi	18	0	0.99538	1.34	20.98	57.2	11.54
130901	DongChengDongSi	35	0.05	0.993375	1.55	20.675	65	9.725
130902	DongChengDongSi	45	2.575	0.995475	1.375	20.625	72	9.825
130903	DongChengDongSi	100	0	0.996	1.325	21.125	73.5	7.1
130904	DongChengDongSi	86	4.025	0.9957	1.1	19.65	84.5	0
130905	DongChengDongSi	31	23.1	0.99445	1.55	18.85	81	7.875
130906	DongChengDongSi	41	3.15	0.995825	1.375	18.9	79.75	6.15
130907	DongChengDongSi	85	0	0.996525	1.175	20.2	75.75	8.8
130908	DongChengDongSi	81	0.6	0.996325	1.225	20.475	81.75	3.25
130909	DongChengDongSi	111	3.175	0.993	1.4	20.075	82.25	4.2
130910	DongChengDongSi	95	0.425	0.992375	1.55	20.325	72.25	8.725
130911	DongChengDongSi	43	0	0.99455	1.275	19.875	72.25	10.275
130912	DongChengDongSi	100	1.175	0.991925	1.475	21.1	78.25	4.975
130913	DongChengDongSi	120	7.95	0.98655	1.225	19.675	88	2.475
130914	DongChengDongSi	112	5.025	0.9883	1.35	21.375	69.75	9
130915	DongChengDongSi	24	0	0.99345	1.375	19.05	56.5	9.725
130916	DongChengDongSi	38	0	0.991475	1.225	19.35	73	6.475
130917	DongChengDongSi	69	5.45	0.9944	1.2	19.675	86.25	1.35
130918	DongChengDongSi	101	5.025	0.998275	1.475	21.1	84.75	2.775
130919	DongChengDongSi	101	1.65	0.993325	1.475	20.9	82.25	3.275
130920	DongChengDongSi	124	0	0.9953	1.025	20.8	70	8.125
130921	DongChengDongSi	38	0	0.995375	1.2	21.375	68.75	8.225
130922	DongChengDongSi	52	0.05	0.994825	1.2	19.925	78.25	0.4
130923	DongChengDongSi	50	14.225	0.99775	2.375	15.075	74.5	0.775
130924	DongChengDongSi	13	0	1.0016	1.525	12.625	64	8.875
130925	DongChengDongSi		0	1.00065	2	13.5	56.5	10.825
130926	DongChengDongSi	37	0	0.9968	1.45	15.2	59.25	10.575
130927	DongChengDongSi	138	0	0.991625	1.4	15.875	67.25	8.75
130928	DongChengDongSi	235	0	0.9907	1.175	15.45	78.5	3.25
130929	DongChengDongSi	252	0	0.9968	1.2	16.475	82.75	0
130930	DongChengDongSi	231	0	0.998375	0.8	17.7	84.75	0
131001	DongChengDongSi	145	10.8	1	1.86	16.88	81.4	4.04
131002	DongChengDongSi	30	0	1.0042	1.84	14.68	61.4	10.34
131003	DongChengDongSi	66	0	1.00102	1.6	14.84	67.8	9.36
131004	DongChengDongSi	117	0	0.9971	1.16	15.5	79.6	3.64
131005	DongChengDongSi	291	0	1.0021	1	17.1	77.8	4.46
131006	DongChengDongSi	272	0	1.00518	1.48	16.5	83	3.48
131007	DongChengDongSi	189	0	1.00526	1.78	17.38	65.8	7.84
131008	DongChengDongSi	80	2.04	1.0029	1.52	16.08	66.2	7.9
131009	DongChengDongSi	101	0	0.9941	1.04	15.34	77.8	3.2
131010	DongChengDongSi	114	0	0.99366	2.34	15.92	60.2	6.82
131011	DongChengDongSi	36	0	0.99824	1.48	13.52	59	9.7
131012	DongChengDongSi	78	0.02	1.00094	1.66	15.36	59	6.46
131013	DongChengDongSi	60	1.94	1.0015	1.8	14.06	74	0.46
131014	DongChengDongSi	62	1.48	1.00884	2.48	11.48	62.8	0.84
131015	DongChengDongSi	13	0	1.01334	1.32	7.54	56	9.92
131016	DongChengDongSi	34	0	1.00828	1.38	9.46	59.4	9.62
131017	DongChengDongSi		0	1.00882	1.14	10.16	66.6	8.72
131018	DongChengDongSi		0.02	1.00768	0.94	10.28	74.6	3.58
131019	DongChengDongSi		0.64	1.00812	2.26	12.2	55.2	5.74
131020	DongChengDongSi		0	1.00782	1.16	10.48	54.8	9.24
131021	DongChengDongSi		0	1.00578	1.06	10.16	64.2	7.76
131022	DongChengDongSi		2.52	1.0047	1.64	10.38	71.2	3.76
131023	DongChengDongSi		2.24	1.00476	2.44	8.4	49.6	9.06
131024	DongChengDongSi		0	1.00944	2.58	8.44	44.2	8.64
131025	DongChengDongSi		0	1.00994	1.3	8.02	63	8.82
131026	DongChengDongSi		0	1.00548	1.48	8.06	62.2	8.76
131027	DongChengDongSi		0	1.00054	0.84	8	70.6	6.32
131028	DongChengDongSi		0.04	1.00218	1.5	9.92	73.2	1.6
131029	DongChengDongSi		0	1.01014	2.16	9.18	56.6	8.48
131030	DongChengDongSi		0	1.0104	1.28	6.9	68	8.22
131031	DongChengDongSi		0	1.00992	0.84	6.92	73.2	2.74
131101	DongChengDongSi	194	0.1	1.00852	1.04	7.74	77.2	0.78
131102	DongChengDongSi	252	0	1.00474	1.32	8.7	82	2.86
131103	DongChengDongSi	81	0.16	1.00688	2.64	10.44	58.8	8.4
131104	DongChengDongSi	14	0	1.01064	1.28	8.1	56.2	9.06
131105	DongChengDongSi	163	0.02	1.00344	1.18	9.08	62	1.4
131106	DongChengDongSi	127	0	0.9999	3.08	8.48	54.4	8.1
131107	DongChengDongSi		0	1.00338	1.86	6.42	43	8.98
131108	DongChengDongSi	75	0	1.00288	1.04	6.16	57.4	5.9
131109	DongChengDongSi	117	0.04	1.0059	2	8.5	52.6	0.76
131110	DongChengDongSi	14	0	1.01182	3.36	3.2	19	8.82
131111	DongChengDongSi	30	0	1.0106	1.96	4.9	36.2	8.7
131112	DongChengDongSi	60	0	1.00744	1.54	5.7	48.4	8.74
131113	DongChengDongSi	166	0	1.00356	1.16	4.64	64.6	0.62
131114	DongChengDongSi	85	0	1.00112	2.36	6.18	47	8.04
131115	DongChengDongSi	110	0	0.9999	1.28	5.52	47.4	8.22
131116	DongChengDongSi	65	0	1.00116	3.46	6.9	36.2	7.84
131117	DongChengDongSi	9	0	1.00666	2.96	3.18	36	8.54
131118	DongChengDongSi	9	0	1.00866	2.86	2.14	32.4	8.54
131119	DongChengDongSi	33	0	1.00704	2.1	1.08	33.2	8.3
131120	DongChengDongSi	62	0	1.00584	1.12	1.52	49.4	8.14
131121	DongChengDongSi		0	1.00824	1.18	1.88	55	7.68
131122	DongChengDongSi	138	0	1.00702	1.26	2.84	56	7.6
131123	DongChengDongSi	243	0	1.00282	1.44	3.54	58.8	4.78
131124	DongChengDongSi	126	0.02	0.9983	2.36	4.96	51.2	0.36
131125	DongChengDongSi		0	0.9994	2.88	2.7	32.2	8.36
131126	DongChengDongSi	22	0	1.0009	3.36	-0.06	33.4	7.74
131127	DongChengDongSi	7	0	1.00866	5.52	-3.7	19.4	8.04
131128	DongChengDongSi	14	0	1.00874	2.7	-2.92	25.8	8.12
131129	DongChengDongSi	63	0	1.00296	1.62	0.96	39.6	8.18
131130	DongChengDongSi	69	0	1.00504	2.26	2.2	37.2	8.2
131201	DongChengDongSi	88	0	1.00245	1.475	-0.275	51.25	7.85
131202	DongChengDongSi	111	0	0.99815	1.225	0.65	50.25	7.2
131203	DongChengDongSi	88	0	1.00098	1.35	2.2	47.25	8.075
131204	DongChengDongSi	112	0	0.9991	1.325	2.2	51.25	5.9
131205	DongChengDongSi	46	0	1.00253	2.4	3.2	36.5	8.05
131206	DongChengDongSi	127	0	0.998725	1.65	0.95	53.5	6.375
131207	DongChengDongSi	258	0	0.99865	1.05	-0.225	68.75	1.975
131208	DongChengDongSi	275	0	0.9995	2.575	2.625	61.5	0.45
131209	DongChengDongSi	59	0	1.00252	2.95	-0.175	37.5	7.975
131210	DongChengDongSi	22	0	0.99815	2.85	-1.4	40.5	5.35
131211	DongChengDongSi	18	0	0.9984	2.4	-1.875	35.5	6.825
131212	DongChengDongSi	19	0	0.999625	3.575	-3.5	27.75	8.025
131213	DongChengDongSi	53	0	1.0039	1.75	-6.075	37.25	7.525
131214	DongChengDongSi	52	0	1.0069	1.95	-4.6	36.75	7.575
131215	DongChengDongSi	39	0	1.01145	1.25	-3.45	37	6.825
131216	DongChengDongSi	142	0	1.00925	0.9	-3.725	46	2.125
131217	DongChengDongSi	112	0.475	1.01118	2.65	-3.175	51.5	2.125
131218	DongChengDongSi	29	0	1.01082	2.275	-7.3	45.5	7.4
131219	DongChengDongSi	45	0	1.00905	2.525	-6.775	43.5	7.7
131220	DongChengDongSi	42	0	1.01255	2.275	-5.875	46.5	7.625
131221	DongChengDongSi	51	0	1.0134	1.325	-5.625	47.5	6.775
131222	DongChengDongSi	138	0	1.0104	0.975	-5.5	51	4.475
131223	DongChengDongSi	141	0	1.01032	1.45	-4.725	53.5	6.725
131224	DongChengDongSi	267	0	1.01215	0.95	-5.3	62.75	2.525
131225	DongChengDongSi	175	0	1.00657	2.15	-4.275	59.25	2.275
131226	DongChengDongSi	8	0	1.01228	3.8	-4.7	29.75	7.675
131227	DongChengDongSi	16	0	1.00865	1.95	-6.175	40	6.375
131228	DongChengDongSi	19	0	1.00478	2.675	-5.7	35.25	7.875
131229	DongChengDongSi	54	0	0.998125	2.675	-3.3	33.5	7.425
131230	DongChengDongSi	42	0	0.99485	2.4	-2.6	36.5	7.675
131231	DongChengDongSi	67	0	0.991275	3.1	-0.225	36.25	7.15
140101	DongChengDongSi	45	0	0.99694	1.94	0.9	37.2	7.56
140102	DongChengDongSi	119	0	1.00048	1.22	-0.68	52.2	6.72
140103	DongChengDongSi	113	0	1.00426	2.44	1.34	39.8	7.98
140104	DongChengDongSi	48	0	1.0046	1.16	-2.46	63.2	3.78
140105	DongChengDongSi	108	0	1.00616	2.06	-1.68	53.4	7.6
140106	DongChengDongSi	119	0.04	1.00768	1.16	-2.24	75	0
140107	DongChengDongSi	127	0	1.00858	2.28	-0.8	51.8	3.08
140108	DongChengDongSi	19	0	1.015	3.08	-3.92	24.8	6.82
140109	DongChengDongSi	18	0	1.0134	1.7	-7.58	32.2	7.5
140110	DongChengDongSi	56	0	1.01246	1.28	-6.5	36.2	7.06
140111	DongChengDongSi	126	0	1.01242	1.54	-5.1	43	5.5
140112	DongChengDongSi	46	0	1.0175	2.42	-3.48	25	8.28
140113	DongChengDongSi	83	0	1.01378	1.42	-5.48	41.8	7.28
140114	DongChengDongSi	115	0	1.01552	1.52	-5.72	47.6	7.26
140115	DongChengDongSi	109	0	1.01302	1.1	-4.9	50.2	6.12
140116	DongChengDongSi	437	0.02	1.00972	1.78	-2.12	59.2	2.26
140117	DongChengDongSi	169	0	1.0131	2.02	-2.4	64.8	3.42
140118	DongChengDongSi	124	0	1.01468	1.58	-2.86	52.4	7.1
140119	DongChengDongSi	139	0	1.00684	2.48	-1.56	55.2	2.12
140120	DongChengDongSi	9	0	1.0112	3.82	-2.08	26.8	8.48
140121	DongChengDongSi	10	0	1.01406	2.08	-4.28	33	8.36
140122	DongChengDongSi	117	0	1.00572	1.08	-3.48	36	7.34
140123	DongChengDongSi	176	0	0.99904	1.08	-3.92	48.4	1.32
140124	DongChengDongSi	183	0	0.9996	1.66	1.12	37.6	0
140125	DongChengDongSi		0	1.00888	2.04	0.14	31.2	6.72
140126	DongChengDongSi	19	0	1.01118	1.44	-3.24	54.4	7.06
140127	DongChengDongSi	99	0	1.00134	2.18	-1.36	54	5.68
140128	DongChengDongSi	28	0	1.0099	2.18	-1.64	37.2	6.58
140129	DongChengDongSi	101	0	0.99708	1.38	-3.06	63.8	1.78
140130	DongChengDongSi	79	0	1.00004	2.48	-0.26	44.4	8.24
140131	DongChengDongSi	140	0.02	1.0013	1.74	-1.82	69.4	0.38
140201	DongChengDongSi	143	0.22	0.99832	1.38	0.82	82	0.68
140202	DongChengDongSi	89	0	0.99716	3.52	2.66	47	7.18
140203	DongChengDongSi	6	0	1.00866	3.8	-2.86	16.8	8.64
140204	DongChengDongSi	16	0	1.01132	1.96	-6.16	19.4	7.48
140205	DongChengDongSi	88	0	1.01016	1.36	-4.52	34.8	3.76
140206	DongChengDongSi	119	0.02	1.01118	1.64	-3.82	51	0.66
140207	DongChengDongSi	91	2.24	1.00874	1.44	-3.54	74	0
140208	DongChengDongSi	63	0.72	1.00946	2.9	-4.2	60.8	6.36
140209	DongChengDongSi	9	0	1.01796	3.2	-7.56	34.2	8.96
140210	DongChengDongSi	17	0	1.0167	1.44	-7.6	39.6	8.92
140211	DongChengDongSi	91	0	1.01008	1.72	-6.52	49	7.64
140212	DongChengDongSi	131	0	1.01384	1.44	-4.56	49.8	7.86
140213	DongChengDongSi	176	0.04	1.01626	1.3	-4.18	63.4	0.2
140214	DongChengDongSi	232	0.02	1.00824	1.08	-3.48	68.8	2.32
140215	DongChengDongSi	446	0	1.00624	1	-2.34	68.6	0.68
140216	DongChengDongSi	344	0	1.01068	1.52	-0.22	56.6	5.3
140217	DongChengDongSi	100	0	1.01634	1.76	0.24	40.2	3.82
140218	DongChengDongSi	61	0.06	1.01384	1.5	-2.5	53.2	1.38
140219	DongChengDongSi	59	0.14	1.01072	1.52	-2.18	54.2	8.28
140220	DongChengDongSi	175	0.06	1.01196	1.2	-2.38	74.4	1.78
140221	DongChengDongSi	264	0	1.01004	1.26	-1.42	73.2	0.66
140222	DongChengDongSi	259	0	1.01162	1.38	1	68.6	0.24
140223	DongChengDongSi	200	0	1.0125	1.48	1.08	70	0
140224	DongChengDongSi	254	0	1.00962	1.02	2.18	67.4	0.26
140225	DongChengDongSi	379	0	1.0081	0.92	2.7	70.2	0.12
140226	DongChengDongSi	445	0.74	1.0051	1.98	4.02	75.8	0
140227	DongChengDongSi	24	0.3	1.00823	4.05	2.45	32.5	10.1
140228	DongChengDongSi	68	0.02	1.00862	1.48	-0.22	55.6	1.6
140301	DongChengDongSi	72	0	1.0058	1.74	2.1	42.8	9.1
140302	DongChengDongSi	119	0	1.00452	2.06	1.72	47.4	7.74
140303	DongChengDongSi	216	0	1.0039	1.46	0.66	60	0
140304	DongChengDongSi	98	0	1.00804	2.98	3.74	32.6	10.14
140305	DongChengDongSi	18	0	1.0104	2.6	1.12	28.8	9.36
140306	DongChengDongSi	16	0	1.01192	2.36	0.84	19.2	10.3
140307	DongChengDongSi	52	0	1.01146	1.5	0.9	34	8.92
140308	DongChengDongSi	128	0	1.00562	1.82	2.44	44.8	6.62
140309	DongChengDongSi	110	0	1.00802	1.92	2.34	40.2	8.82
140310	DongChengDongSi	69	0	1.0059	1.52	2.22	57	6.78
140311	DongChengDongSi	198	0	1.00002	2.06	5.52	53.4	2.3
140312	DongChengDongSi	10	0.08	1.00758	3.46	5.78	22.6	8.42
140313	DongChengDongSi	23	0	1.00452	2.14	4.82	21.4	9.56
140314	DongChengDongSi		0	1.00076	2.82	8.54	18.8	10.64
140315	DongChengDongSi	44	0	0.9936	2.02	11.18	25.2	9.16
140316	DongChengDongSi	117	0	0.99724	2.52	10.38	33.6	7.94
140317	DongChengDongSi	108	0	0.9948	2.66	11.48	38.6	6.52
140318	DongChengDongSi	35	0	1.00442	2.3	10.58	30.4	6.18
140319	DongChengDongSi	52	0.08	1.00486	1.62	6.84	46.6	2.3
140320	DongChengDongSi	10	0	1.00914	3.06	10.12	19.8	10.92
140321	DongChengDongSi	18	0	1.00334	2.04	11.68	23.6	10.4
140322	DongChengDongSi	56	0	1.00032	2.46	13.26	22.4	10.54
140323	DongChengDongSi	126	0	1.00576	1.6	11.76	34.6	7.68
140324	DongChengDongSi	224	0	0.99686	1.94	12.6	46.4	7
140325	DongChengDongSi	212	0	0.9933	1.36	14.16	46.8	6.12
140326	DongChengDongSi	190	0	0.99316	1.68	15.62	55.2	6.6
140327	DongChengDongSi	267	0	0.9939	1.5	14.1	62.8	0
140328	DongChengDongSi	121	3.74	0.99088	1.84	14.64	63.2	4.24
140329	DongChengDongSi	63	0.02	0.99568	1.68	14.68	49.8	10.34
140330	DongChengDongSi	36	0	0.9982	1.44	16.5	37	10.16
140331	DongChengDongSi	137	0.9	0.9983	1.94	16.06	46	1.18
140401	DongChengDongSi	126	0.04	0.9954	1.44	14.74	55.4	9.34
140402	DongChengDongSi	112	0	0.99754	2	15.72	41.8	6.62
140403	DongChengDongSi	34	0	1.0062	3.42	12.7	22.4	11.18
140404	DongChengDongSi	30	0	0.99794	3.6	13.74	24.8	10.82
140405	DongChengDongSi	20	0	1.00496	2.32	11.88	24	11.34
140406	DongChengDongSi	55	0	1.00068	2.46	14.98	24.6	10.7
140407	DongChengDongSi	87	0	0.99604	1.5	16.24	33.6	9.98
140408	DongChengDongSi	44	0	0.99614	1.72	16.96	43	8.32
140409	DongChengDongSi	118	0	0.99412	3.36	20.06	40	8.82
140410	DongChengDongSi	82	0.02	1.00404	1.96	15.28	31.2	0.7
140411	DongChengDongSi	53	0.06	1.00146	1.62	13.62	40	1.82
140412	DongChengDongSi	104	0	0.99864	1.22	13.78	42.6	8.32
140413	DongChengDongSi	148	0	0.99972	1.54	15.82	49.8	9.04
140414	DongChengDongSi	227	0	0.99904	1.76	18.3	57	7.94
140415	DongChengDongSi	31	0	1.00136	2.46	17.38	48	2.46
140416	DongChengDongSi	52	0	0.99682	1.46	16.08	35.2	0.56
140417	DongChengDongSi	98	4.56	0.99504	1.34	13.46	65.2	1.6
140418	DongChengDongSi	142	0	1.00156	1.38	14.62	66.8	2.84
140419	DongChengDongSi	54	1.46	1.00332	1.3	11.9	60.8	1.38
140420	DongChengDongSi	52	0.02	0.9995	1.46	13.08	54	8.94
140421	DongChengDongSi	80	0	0.9988	1.34	16.22	40.2	9.84
140422	DongChengDongSi	57	0	0.99648	2.42	18.28	36.6	11.06
140423	DongChengDongSi		0.46	0.9934	2.52	19.5	52.8	7.22
140424	DongChengDongSi		1.18	0.9969	1.7	19	60.2	5.88
140425	DongChengDongSi		0.6	0.99952	2.38	18.88	53.2	6.3
140426	DongChengDongSi		13.8	1.00296	2.64	14.18	63.6	7.74
140427	DongChengDongSi		0	1.00316	1.6	16.1	52	10.74
140428	DongChengDongSi		0	1.00196	1.5	17.52	45.6	11.18
140429	DongChengDongSi	59	0	0.99634	1.54	18.56	43.2	11.12
140430	DongChengDongSi	99	0	0.99214	1.74	20.08	47.6	10.56
140501	DongChengDongSi	119	0.26	0.99094	2.74	19.66	56	5.5
140502	DongChengDongSi	19	4.62	0.99832	3.58	14.86	35.2	8.1
140503	DongChengDongSi	36	0.02	0.99586	4.12	15.1	38.2	9.42
140504	DongChengDongSi	32	0	0.99996	4.52	12.36	21	11.08
140505	DongChengDongSi	16	0	1.00012	1.96	12.84	27.4	11.94
140506	DongChengDongSi	64	0	0.99142	2.04	15.24	39.6	8.04
140507	DongChengDongSi	85	0.86	0.9892	2.76	17.58	42.4	11.38
140508	DongChengDongSi	85	0	0.99658	2.32	16.58	47	9.08
140509	DongChengDongSi	68	0	0.99718	2.68	17.48	43.4	0.96
140510	DongChengDongSi	52	0.58	0.99842	2.12	16.4	49.6	1.78
140511	DongChengDongSi	24	23.5	0.98972	2.42	11.04	87	0.14
140512	DongChengDongSi	40	0.72	0.98414	2.54	19.6	53.8	11.84
140513	DongChengDongSi	78	0	0.9839	1.88	21.02	46.8	9.86
140514	DongChengDongSi	23	0	0.98842	3.3	18.18	26.4	8.48
140515	DongChengDongSi	40	0	0.98358	2.08	20.16	33.6	11.2
140516	DongChengDongSi	48	0.02	0.98968	2.66	22.54	29.8	12.06
140517	DongChengDongSi	61	0.26	0.9957	1.76	20.62	41.6	8.62
140518	DongChengDongSi	72	0.02	0.99192	1.54	22.26	45.8	10.34
140519	DongChengDongSi	112	2.74	0.98788	1.5	22.26	58.2	7.86
140520	DongChengDongSi	96	0	0.98746	2.24	24.2	45.2	12.08
140521	DongChengDongSi	107	0.02	0.98848	1.88	23.98	51.8	9.14
140522	DongChengDongSi	159	0	0.98944	2.18	26.8	45.6	11.04
140523	DongChengDongSi	74	0	0.9932	2.32	27.52	37.8	9.1
140524	DongChengDongSi	89	6.24	0.99124	1.56	20.3	81.4	0.64
140525	DongChengDongSi	78	0.02	0.98982	3	21.68	53.2	8.7
140526	DongChengDongSi	12	0	0.98372	3.2	24.44	29.6	12.28
140527	DongChengDongSi	31	0.04	0.97958	3.96	24.48	33.2	10.52
140528	DongChengDongSi	23	0	0.98452	1.98	26.82	30	12.44
140529	DongChengDongSi		0.02	0.9818	1.68	29.56	29.2	12.64
140530	DongChengDongSi	89	0.02	0.98868	2.2	28.74	36	10.74
140531	DongChengDongSi	106	0	0.99034	1.78	27.62	45	6.4
140601	DongChengDongSi	51	3.2	0.984633	2.16667	22.9	63.3333	2.23333
140602	DongChengDongSi	27	0.0333333	0.987133	2.23333	21.2	53	6.4
140603	DongChengDongSi	34	0	0.983967	2.6	23.7333	49.3333	12.0667
140604	DongChengDongSi	54	0.0666667	0.982333	0.966667	23.8333	55	8.03333
140605	DongChengDongSi	65	0	0.981	1.76667	25.4333	55.6667	11.3333
140606	DongChengDongSi	64	39.6667	0.980633	2.36667	21.3333	70.3333	3.53333
140607	DongChengDongSi	6	2.73333	0.980233	2.03333	21.0333	57	12.6667
140608	DongChengDongSi	27	1.4	0.978267	1.4	20.7	61	8.36667
140609	DongChengDongSi	28	0.9	0.980767	1.66667	20.9333	60.3333	9.76667
140610	DongChengDongSi	64	0.433333	0.984533	1.2	20.7	68.3333	5.03333
140611	DongChengDongSi	44	0.2	0.9858	1.5	22.1667	61.3333	11.1667
140612	DongChengDongSi	24	0.0333333	0.9827	1.93333	25.3333	50	11.5667
140613	DongChengDongSi	61	1	0.983333	1.3	24.6333	61	8.06667
140614	DongChengDongSi	30	0.4	0.9827	1.36667	24.9333	60	12.6333
140615	DongChengDongSi	117	1.66667	0.9807	1.73333	25.5667	60.6667	4.93333
140616	DongChengDongSi	138	0.5	0.9789	1.9	24.7333	65	3.43333
140617	DongChengDongSi	89	8.26667	0.978267	1.4	23.4	70.6667	3.6
140618	DongChengDongSi	58	2.63333	0.9791	1.66667	23.1667	66.6667	8.3
140619	DongChengDongSi	133	0.0666667	0.9806	1.26667	23.0333	66.6667	4.63333
140620	DongChengDongSi	34	24.3	0.982767	2	21.8	73.3333	7.56667
140621	DongChengDongSi	66	6.53333	0.984133	1.5	21.8667	71.6667	8.03333
140622	DongChengDongSi	29	16.4	0.984833	1.1	20.8	77.3333	4.7
140623	DongChengDongSi	23	0	0.9839	1.43333	23.4667	61.6667	12.8667
140624	DongChengDongSi	53	0	0.980733	1.63333	25.4333	57.3333	11.0667
140625	DongChengDongSi	97	4.53333	0.9798	1.3	22.8	77.3333	0.433333
140626	DongChengDongSi	153	2.1	0.979367	1.43333	24.8333	72	8.63333
140627	DongChengDongSi	28	0.633333	0.982933	1.63333	26.1	52.3333	12.8333
140628	DongChengDongSi	22	0	0.982067	1.43333	26.7	43.6667	12.7333
140629	DongChengDongSi	52	0	0.9821	1.16667	27.1	52	9.3
140630	DongChengDongSi	79	0	0.982267	1.4	27.2667	52	9.03333
140701	DongChengDongSi	119	24.6	0.98435	1.825	25.825	64.5	1.325
140702	DongChengDongSi	64	39.975	0.9826	1.225	22.5	85	1.55
140703	DongChengDongSi	202	0.2	0.9806	1.125	24.85	79	2.375
140704	DongChengDongSi	236	0.05	0.9839	1.7	26.55	72	6.675
140705	DongChengDongSi	133	0.8	0.9862	1.525	26.5	72.25	4.55
140706	DongChengDongSi	216	0	0.984525	1.35	26.825	72.25	2.325
140707	DongChengDongSi	177	5.45	0.982525	1.6	26.75	73	0
140708	DongChengDongSi	135	0.675	0.981875	2.1	27.025	60.25	6.65
140709	DongChengDongSi	25	0	0.983975	1.4	25.8	50.75	3.175
140710	DongChengDongSi	28	0	0.97995	1.775	27.75	47	12.7
140711	DongChengDongSi	31	0	0.97965	2.125	27.775	46.75	12.5
140712	DongChengDongSi	11	0.025	0.9821	2.125	27.375	39.5	12.225
140713	DongChengDongSi	15	5.85	0.98215	2.475	26.2	50	11.175
140714	DongChengDongSi	31	0	0.982175	1.6	26.95	50.5	10.85
140715	DongChengDongSi	43	0.175	0.983425	2.4	26.175	55	8.625
140716	DongChengDongSi	129	3.625	0.983	1.5	24.95	71	3.075
140717	DongChengDongSi	145	0.85	0.98505	1.4	25.375	75	3.125
140718	DongChengDongSi	157	0	0.9865	1.4	28.25	71.25	5.4
140719	DongChengDongSi	73	0	0.987725	1.8	30.325	66.25	10.55
140720	DongChengDongSi	70	1.075	0.98475	2.05	30.15	66.25	10.425
140721	DongChengDongSi	33	3.95	0.981925	2.325	28.15	62.25	3.65
140722	DongChengDongSi	11	0.125	0.986	1.275	25.625	61.25	0.2
140723	DongChengDongSi	23	0.025	0.983925	1.6	24.775	65	1.075
140724	DongChengDongSi	70	0.175	0.98495	1.15	25.575	66.5	2.25
140725	DongChengDongSi	80	0	0.985325	1.375	26.575	58.5	11.85
140726	DongChengDongSi	113	0	0.9876	1.825	27.775	54.75	11.775
140727	DongChengDongSi	108	0	0.98775	1.775	28.4	51.5	10.875
140728	DongChengDongSi	122	0	0.983725	1.675	28.575	59	10.4
140729	DongChengDongSi		0	0.982625	2.5	28.5	59	4.825
140730	DongChengDongSi	124	19.05	0.984825	1.75	24.65	77.75	2.55
140731	DongChengDongSi	215	0.025	0.98625	1.725	26.625	72	5.1
130801	DongChengTianTan	216	20.14	0.9866	1.34	23.34	85.8	3.68
130802	DongChengTianTan	32	0.28	0.9887	1.44	25.1	80.6	6.48
130803	DongChengTianTan	56	0.68	0.9873	1.44	26.12	72	11.22
130804	DongChengTianTan	21	5.34	0.98408	1.76	26.48	77.4	7.92
130805	DongChengTianTan	41	9.66	0.98188	1.12	24.76	79.4	11.88
130806	DongChengTianTan	124	0	0.98278	1.12	27.94	82.4	3.9
130807	DongChengTianTan	90	27.8	0.98556	1.76	24.86	84.6	2
130808	DongChengTianTan	29	0.86	0.98426	1.7	26.1	77.2	9.2
130809	DongChengTianTan	33	0.08	0.98474	1.5	27.18	70	11.84
130810	DongChengTianTan	78	0	0.98814	1.48	28.6	75.2	9.2
130811	DongChengTianTan	149	9.14	0.98982	1.6	27.1	86.6	0.86
130812	DongChengTianTan	93	4.72	0.98864	1.5	25.52	85.4	4.28
130813	DongChengTianTan	69	0	0.9883	1.36	27.44	81.4	7.72
130814	DongChengTianTan	82	4.2	0.98774	1.68	27.48	79.4	8
130815	DongChengTianTan	78	0.08	0.98642	1.18	28.78	81.8	1.52
130816	DongChengTianTan	117	21.12	0.98148	1.7	28.06	85.4	1.7
130817	DongChengTianTan	144	0	0.98444	2.04	29.06	59	11.28
130818	DongChengTianTan	15	0	0.99124	1.8	27.1	53	11.32
130819	DongChengTianTan	20	0	0.9936	1.2	25.96	60.2	11.36
130820	DongChengTianTan	88	2.24	0.99272	1.34	25.54	71	3.84
130821	DongChengTianTan	90	0.44	0.99134	1.18	25.32	75.8	6.6
130822	DongChengTianTan	108	0.06	0.99216	0.96	23.74	81.6	1
130823	DongChengTianTan	92	0.02	0.99254	1.28	25.58	66.8	9
130824	DongChengTianTan	35	0	0.9927	1.4	25.66	61.4	10.12
130825	DongChengTianTan	35	0	0.99042	1.4	26.3	61.8	11.7
130826	DongChengTianTan	44	0	0.98914	1.86	26.38	61.6	11.02
130827	DongChengTianTan	62	1.3	0.99066	1.46	24.28	76.8	1.5
130828	DongChengTianTan	53	21.4	0.98372	1.36	23.1	88.4	0
130829	DongChengTianTan	61	0	0.98578	3.06	22.92	61.8	8.78
130830	DongChengTianTan	6	0.38	0.99494	2.16	20.86	55.2	10.58
130831	DongChengTianTan	18	0	0.99538	1.34	20.98	57.2	11.54
130901	DongChengTianTan	35	0.05	0.993375	1.55	20.675	65	9.725
130902	DongChengTianTan	44	2.575	0.995475	1.375	20.625	72	9.825
130903	DongChengTianTan	92	0	0.996	1.325	21.125	73.5	7.1
130904	DongChengTianTan	90	4.025	0.9957	1.1	19.65	84.5	0
130905	DongChengTianTan	27	23.1	0.99445	1.55	18.85	81	7.875
130906	DongChengTianTan	41	3.15	0.995825	1.375	18.9	79.75	6.15
130907	DongChengTianTan	86	0	0.996525	1.175	20.2	75.75	8.8
130908	DongChengTianTan	80	0.6	0.996325	1.225	20.475	81.75	3.25
130909	DongChengTianTan	112	3.175	0.993	1.4	20.075	82.25	4.2
130910	DongChengTianTan	90	0.425	0.992375	1.55	20.325	72.25	8.725
130911	DongChengTianTan	40	0	0.99455	1.275	19.875	72.25	10.275
130912	DongChengTianTan	94	1.175	0.991925	1.475	21.1	78.25	4.975
130913	DongChengTianTan	108	7.95	0.98655	1.225	19.675	88	2.475
130914	DongChengTianTan	100	5.025	0.9883	1.35	21.375	69.75	9
130915	DongChengTianTan	18	0	0.99345	1.375	19.05	56.5	9.725
130916	DongChengTianTan	34	0	0.991475	1.225	19.35	73	6.475
130917	DongChengTianTan	64	5.45	0.9944	1.2	19.675	86.25	1.35
130918	DongChengTianTan	94	5.025	0.998275	1.475	21.1	84.75	2.775
130919	DongChengTianTan	106	1.65	0.993325	1.475	20.9	82.25	3.275
130920	DongChengTianTan	115	0	0.9953	1.025	20.8	70	8.125
130921	DongChengTianTan	37	0	0.995375	1.2	21.375	68.75	8.225
130922	DongChengTianTan	46	0.05	0.994825	1.2	19.925	78.25	0.4
130923	DongChengTianTan	32	14.225	0.99775	2.375	15.075	74.5	0.775
130924	DongChengTianTan		0	1.0016	1.525	12.625	64	8.875
130925	DongChengTianTan		0	1.00065	2	13.5	56.5	10.825
130926	DongChengTianTan	35	0	0.9968	1.45	15.2	59.25	10.575
130927	DongChengTianTan	129	0	0.991625	1.4	15.875	67.25	8.75
130928	DongChengTianTan	232	0	0.9907	1.175	15.45	78.5	3.25
130929	DongChengTianTan	236	0	0.9968	1.2	16.475	82.75	0
130930	DongChengTianTan	211	0	0.998375	0.8	17.7	84.75	0
131001	DongChengTianTan	134	10.8	1	1.86	16.88	81.4	4.04
131002	DongChengTianTan	25	0	1.0042	1.84	14.68	61.4	10.34
131003	DongChengTianTan	61	0	1.00102	1.6	14.84	67.8	9.36
131004	DongChengTianTan	116	0	0.9971	1.16	15.5	79.6	3.64
131005	DongChengTianTan	288	0	1.0021	1	17.1	77.8	4.46
131006	DongChengTianTan	251	0	1.00518	1.48	16.5	83	3.48
131007	DongChengTianTan	112	0	1.00526	1.78	17.38	65.8	7.84
131008	DongChengTianTan	42	2.04	1.0029	1.52	16.08	66.2	7.9
131009	DongChengTianTan	97	0	0.9941	1.04	15.34	77.8	3.2
131010	DongChengTianTan	112	0	0.99366	2.34	15.92	60.2	6.82
131011	DongChengTianTan	33	0	0.99824	1.48	13.52	59	9.7
131012	DongChengTianTan	72	0.02	1.00094	1.66	15.36	59	6.46
131013	DongChengTianTan	59	1.94	1.0015	1.8	14.06	74	0.46
131014	DongChengTianTan	66	1.48	1.00884	2.48	11.48	62.8	0.84
131015	DongChengTianTan	12	0	1.01334	1.32	7.54	56	9.92
131016	DongChengTianTan	33	0	1.00828	1.38	9.46	59.4	9.62
131017	DongChengTianTan	87	0	1.00882	1.14	10.16	66.6	8.72
131018	DongChengTianTan		0.02	1.00768	0.94	10.28	74.6	3.58
131019	DongChengTianTan		0.64	1.00812	2.26	12.2	55.2	5.74
131020	DongChengTianTan		0	1.00782	1.16	10.48	54.8	9.24
131021	DongChengTianTan		0	1.00578	1.06	10.16	64.2	7.76
131022	DongChengTianTan		2.52	1.0047	1.64	10.38	71.2	3.76
131023	DongChengTianTan		2.24	1.00476	2.44	8.4	49.6	9.06
131024	DongChengTianTan		0	1.00944	2.58	8.44	44.2	8.64
131025	DongChengTianTan		0	1.00994	1.3	8.02	63	8.82
131026	DongChengTianTan		0	1.00548	1.48	8.06	62.2	8.76
131027	DongChengTianTan		0	1.00054	0.84	8	70.6	6.32
131028	DongChengTianTan		0.04	1.00218	1.5	9.92	73.2	1.6
131029	DongChengTianTan		0	1.01014	2.16	9.18	56.6	8.48
131030	DongChengTianTan		0	1.0104	1.28	6.9	68	8.22
131031	DongChengTianTan		0	1.00992	0.84	6.92	73.2	2.74
131101	DongChengTianTan	195	0.1	1.00852	1.04	7.74	77.2	0.78
131102	DongChengTianTan	233	0	1.00474	1.32	8.7	82	2.86
131103	DongChengTianTan	78	0.16	1.00688	2.64	10.44	58.8	8.4
131104	DongChengTianTan	17	0	1.01064	1.28	8.1	56.2	9.06
131105	DongChengTianTan	157	0.02	1.00344	1.18	9.08	62	1.4
131106	DongChengTianTan	122	0	0.9999	3.08	8.48	54.4	8.1
131107	DongChengTianTan		0	1.00338	1.86	6.42	43	8.98
131108	DongChengTianTan	71	0	1.00288	1.04	6.16	57.4	5.9
131109	DongChengTianTan	109	0.04	1.0059	2	8.5	52.6	0.76
131110	DongChengTianTan	15	0	1.01182	3.36	3.2	19	8.82
131111	DongChengTianTan	35	0	1.0106	1.96	4.9	36.2	8.7
131112	DongChengTianTan	60	0	1.00744	1.54	5.7	48.4	8.74
131113	DongChengTianTan	158	0	1.00356	1.16	4.64	64.6	0.62
131114	DongChengTianTan	75	0	1.00112	2.36	6.18	47	8.04
131115	DongChengTianTan	101	0	0.9999	1.28	5.52	47.4	8.22
131116	DongChengTianTan	55	0	1.00116	3.46	6.9	36.2	7.84
131117	DongChengTianTan	10	0	1.00666	2.96	3.18	36	8.54
131118	DongChengTianTan	9	0	1.00866	2.86	2.14	32.4	8.54
131119	DongChengTianTan	29	0	1.00704	2.1	1.08	33.2	8.3
131120	DongChengTianTan	64	0	1.00584	1.12	1.52	49.4	8.14
131121	DongChengTianTan		0	1.00824	1.18	1.88	55	7.68
131122	DongChengTianTan	138	0	1.00702	1.26	2.84	56	7.6
131123	DongChengTianTan	237	0	1.00282	1.44	3.54	58.8	4.78
131124	DongChengTianTan	114	0.02	0.9983	2.36	4.96	51.2	0.36
131125	DongChengTianTan		0	0.9994	2.88	2.7	32.2	8.36
131126	DongChengTianTan	26	0	1.0009	3.36	-0.06	33.4	7.74
131127	DongChengTianTan	7	0	1.00866	5.52	-3.7	19.4	8.04
131128	DongChengTianTan	12	0	1.00874	2.7	-2.92	25.8	8.12
131129	DongChengTianTan	79	0	1.00296	1.62	0.96	39.6	8.18
131130	DongChengTianTan	70	0	1.00504	2.26	2.2	37.2	8.2
131201	DongChengTianTan	96	0	1.00245	1.475	-0.275	51.25	7.85
131202	DongChengTianTan	107	0	0.99815	1.225	0.65	50.25	7.2
131203	DongChengTianTan	84	0	1.00098	1.35	2.2	47.25	8.075
131204	DongChengTianTan	113	0	0.9991	1.325	2.2	51.25	5.9
131205	DongChengTianTan	49	0	1.00253	2.4	3.2	36.5	8.05
131206	DongChengTianTan	143	0	0.998725	1.65	0.95	53.5	6.375
131207	DongChengTianTan	262	0	0.99865	1.05	-0.225	68.75	1.975
131208	DongChengTianTan	251	0	0.9995	2.575	2.625	61.5	0.45
131209	DongChengTianTan	44	0	1.00252	2.95	-0.175	37.5	7.975
131210	DongChengTianTan	23	0	0.99815	2.85	-1.4	40.5	5.35
131211	DongChengTianTan	18	0	0.9984	2.4	-1.875	35.5	6.825
131212	DongChengTianTan	19	0	0.999625	3.575	-3.5	27.75	8.025
131213	DongChengTianTan	56	0	1.0039	1.75	-6.075	37.25	7.525
131214	DongChengTianTan	50	0	1.0069	1.95	-4.6	36.75	7.575
131215	DongChengTianTan	48	0	1.01145	1.25	-3.45	37	6.825
131216	DongChengTianTan	125	0	1.00925	0.9	-3.725	46	2.125
131217	DongChengTianTan	109	0.475	1.01118	2.65	-3.175	51.5	2.125
131218	DongChengTianTan	34	0	1.01082	2.275	-7.3	45.5	7.4
131219	DongChengTianTan	42	0	1.00905	2.525	-6.775	43.5	7.7
131220	DongChengTianTan		0	1.01255	2.275	-5.875	46.5	7.625
131221	DongChengTianTan	44	0	1.0134	1.325	-5.625	47.5	6.775
131222	DongChengTianTan	129	0	1.0104	0.975	-5.5	51	4.475
131223	DongChengTianTan	135	0	1.01032	1.45	-4.725	53.5	6.725
131224	DongChengTianTan	262	0	1.01215	0.95	-5.3	62.75	2.525
131225	DongChengTianTan	190	0	1.00657	2.15	-4.275	59.25	2.275
131226	DongChengTianTan	9	0	1.01228	3.8	-4.7	29.75	7.675
131227	DongChengTianTan	15	0	1.00865	1.95	-6.175	40	6.375
131228	DongChengTianTan	16	0	1.00478	2.675	-5.7	35.25	7.875
131229	DongChengTianTan	58	0	0.998125	2.675	-3.3	33.5	7.425
131230	DongChengTianTan	42	0	0.99485	2.4	-2.6	36.5	7.675
131231	DongChengTianTan	64	0	0.991275	3.1	-0.225	36.25	7.15
140101	DongChengTianTan	40	0	0.99694	1.94	0.9	37.2	7.56
140102	DongChengTianTan	100	0	1.00048	1.22	-0.68	52.2	6.72
140103	DongChengTianTan	99	0	1.00426	2.44	1.34	39.8	7.98
140104	DongChengTianTan	45	0	1.0046	1.16	-2.46	63.2	3.78
140105	DongChengTianTan	93	0	1.00616	2.06	-1.68	53.4	7.6
140106	DongChengTianTan	121	0.04	1.00768	1.16	-2.24	75	0
140107	DongChengTianTan	115	0	1.00858	2.28	-0.8	51.8	3.08
140108	DongChengTianTan	14	0	1.015	3.08	-3.92	24.8	6.82
140109	DongChengTianTan	17	0	1.0134	1.7	-7.58	32.2	7.5
140110	DongChengTianTan	56	0	1.01246	1.28	-6.5	36.2	7.06
140111	DongChengTianTan	122	0	1.01242	1.54	-5.1	43	5.5
140112	DongChengTianTan	49	0	1.0175	2.42	-3.48	25	8.28
140113	DongChengTianTan	90	0	1.01378	1.42	-5.48	41.8	7.28
140114	DongChengTianTan	109	0	1.01552	1.52	-5.72	47.6	7.26
140115	DongChengTianTan	108	0	1.01302	1.1	-4.9	50.2	6.12
140116	DongChengTianTan	399	0.02	1.00972	1.78	-2.12	59.2	2.26
140117	DongChengTianTan	183	0	1.0131	2.02	-2.4	64.8	3.42
140118	DongChengTianTan		0	1.01468	1.58	-2.86	52.4	7.1
140119	DongChengTianTan	138	0	1.00684	2.48	-1.56	55.2	2.12
140120	DongChengTianTan	10	0	1.0112	3.82	-2.08	26.8	8.48
140121	DongChengTianTan	10	0	1.01406	2.08	-4.28	33	8.36
140122	DongChengTianTan	112	0	1.00572	1.08	-3.48	36	7.34
140123	DongChengTianTan	164	0	0.99904	1.08	-3.92	48.4	1.32
140124	DongChengTianTan	168	0	0.9996	1.66	1.12	37.6	0
140125	DongChengTianTan		0	1.00888	2.04	0.14	31.2	6.72
140126	DongChengTianTan	18	0	1.01118	1.44	-3.24	54.4	7.06
140127	DongChengTianTan	93	0	1.00134	2.18	-1.36	54	5.68
140128	DongChengTianTan	26	0	1.0099	2.18	-1.64	37.2	6.58
140129	DongChengTianTan	93	0	0.99708	1.38	-3.06	63.8	1.78
140130	DongChengTianTan	71	0	1.00004	2.48	-0.26	44.4	8.24
140131	DongChengTianTan	127	0.02	1.0013	1.74	-1.82	69.4	0.38
140201	DongChengTianTan	132	0.22	0.99832	1.38	0.82	82	0.68
140202	DongChengTianTan	79	0	0.99716	3.52	2.66	47	7.18
140203	DongChengTianTan	6	0	1.00866	3.8	-2.86	16.8	8.64
140204	DongChengTianTan	13	0	1.01132	1.96	-6.16	19.4	7.48
140205	DongChengTianTan	83	0	1.01016	1.36	-4.52	34.8	3.76
140206	DongChengTianTan	108	0.02	1.01118	1.64	-3.82	51	0.66
140207	DongChengTianTan	89	2.24	1.00874	1.44	-3.54	74	0
140208	DongChengTianTan	56	0.72	1.00946	2.9	-4.2	60.8	6.36
140209	DongChengTianTan	7	0	1.01796	3.2	-7.56	34.2	8.96
140210	DongChengTianTan	11	0	1.0167	1.44	-7.6	39.6	8.92
140211	DongChengTianTan	84	0	1.01008	1.72	-6.52	49	7.64
140212	DongChengTianTan	130	0	1.01384	1.44	-4.56	49.8	7.86
140213	DongChengTianTan	176	0.04	1.01626	1.3	-4.18	63.4	0.2
140214	DongChengTianTan	229	0.02	1.00824	1.08	-3.48	68.8	2.32
140215	DongChengTianTan	403	0	1.00624	1	-2.34	68.6	0.68
140216	DongChengTianTan	341	0	1.01068	1.52	-0.22	56.6	5.3
140217	DongChengTianTan		0	1.01634	1.76	0.24	40.2	3.82
140218	DongChengTianTan	63	0.06	1.01384	1.5	-2.5	53.2	1.38
140219	DongChengTianTan	51	0.14	1.01072	1.52	-2.18	54.2	8.28
140220	DongChengTianTan	178	0.06	1.01196	1.2	-2.38	74.4	1.78
140221	DongChengTianTan	233	0	1.01004	1.26	-1.42	73.2	0.66
140222	DongChengTianTan	254	0	1.01162	1.38	1	68.6	0.24
140223	DongChengTianTan	192	0	1.0125	1.48	1.08	70	0
140224	DongChengTianTan	238	0	1.00962	1.02	2.18	67.4	0.26
140225	DongChengTianTan	349	0	1.0081	0.92	2.7	70.2	0.12
140226	DongChengTianTan	410	0.74	1.0051	1.98	4.02	75.8	0
140227	DongChengTianTan	24	0.3	1.00823	4.05	2.45	32.5	10.1
140228	DongChengTianTan	61	0.02	1.00862	1.48	-0.22	55.6	1.6
140301	DongChengTianTan	63	0	1.0058	1.74	2.1	42.8	9.1
140302	DongChengTianTan	125	0	1.00452	2.06	1.72	47.4	7.74
140303	DongChengTianTan	202	0	1.0039	1.46	0.66	60	0
140304	DongChengTianTan	87	0	1.00804	2.98	3.74	32.6	10.14
140305	DongChengTianTan	15	0	1.0104	2.6	1.12	28.8	9.36
140306	DongChengTianTan	13	0	1.01192	2.36	0.84	19.2	10.3
140307	DongChengTianTan	51	0	1.01146	1.5	0.9	34	8.92
140308	DongChengTianTan	127	0	1.00562	1.82	2.44	44.8	6.62
140309	DongChengTianTan	105	0	1.00802	1.92	2.34	40.2	8.82
140310	DongChengTianTan	70	0	1.0059	1.52	2.22	57	6.78
140311	DongChengTianTan	166	0	1.00002	2.06	5.52	53.4	2.3
140312	DongChengTianTan	11	0.08	1.00758	3.46	5.78	22.6	8.42
140313	DongChengTianTan	22	0	1.00452	2.14	4.82	21.4	9.56
140314	DongChengTianTan	19	0	1.00076	2.82	8.54	18.8	10.64
140315	DongChengTianTan	42	0	0.9936	2.02	11.18	25.2	9.16
140316	DongChengTianTan	116	0	0.99724	2.52	10.38	33.6	7.94
140317	DongChengTianTan	105	0	0.9948	2.66	11.48	38.6	6.52
140318	DongChengTianTan	33	0	1.00442	2.3	10.58	30.4	6.18
140319	DongChengTianTan	52	0.08	1.00486	1.62	6.84	46.6	2.3
140320	DongChengTianTan	11	0	1.00914	3.06	10.12	19.8	10.92
140321	DongChengTianTan	21	0	1.00334	2.04	11.68	23.6	10.4
140322	DongChengTianTan	51	0	1.00032	2.46	13.26	22.4	10.54
140323	DongChengTianTan	120	0	1.00576	1.6	11.76	34.6	7.68
140324	DongChengTianTan	206	0	0.99686	1.94	12.6	46.4	7
140325	DongChengTianTan	190	0	0.9933	1.36	14.16	46.8	6.12
140326	DongChengTianTan	169	0	0.99316	1.68	15.62	55.2	6.6
140327	DongChengTianTan	236	0	0.9939	1.5	14.1	62.8	0
140328	DongChengTianTan	120	3.74	0.99088	1.84	14.64	63.2	4.24
140329	DongChengTianTan	65	0.02	0.99568	1.68	14.68	49.8	10.34
140330	DongChengTianTan	40	0	0.9982	1.44	16.5	37	10.16
140331	DongChengTianTan	135	0.9	0.9983	1.94	16.06	46	1.18
140401	DongChengTianTan	125	0.04	0.9954	1.44	14.74	55.4	9.34
140402	DongChengTianTan	107	0	0.99754	2	15.72	41.8	6.62
140403	DongChengTianTan	36	0	1.0062	3.42	12.7	22.4	11.18
140404	DongChengTianTan	31	0	0.99794	3.6	13.74	24.8	10.82
140405	DongChengTianTan	23	0	1.00496	2.32	11.88	24	11.34
140406	DongChengTianTan	55	0	1.00068	2.46	14.98	24.6	10.7
140407	DongChengTianTan	84	0	0.99604	1.5	16.24	33.6	9.98
140408	DongChengTianTan	50	0	0.99614	1.72	16.96	43	8.32
140409	DongChengTianTan	109	0	0.99412	3.36	20.06	40	8.82
140410	DongChengTianTan	84	0.02	1.00404	1.96	15.28	31.2	0.7
140411	DongChengTianTan	58	0.06	1.00146	1.62	13.62	40	1.82
140412	DongChengTianTan	92	0	0.99864	1.22	13.78	42.6	8.32
140413	DongChengTianTan	144	0	0.99972	1.54	15.82	49.8	9.04
140414	DongChengTianTan	207	0	0.99904	1.76	18.3	57	7.94
140415	DongChengTianTan	29	0	1.00136	2.46	17.38	48	2.46
140416	DongChengTianTan	49	0	0.99682	1.46	16.08	35.2	0.56
140417	DongChengTianTan	107	4.56	0.99504	1.34	13.46	65.2	1.6
140418	DongChengTianTan	159	0	1.00156	1.38	14.62	66.8	2.84
140419	DongChengTianTan	51	1.46	1.00332	1.3	11.9	60.8	1.38
140420	DongChengTianTan	49	0.02	0.9995	1.46	13.08	54	8.94
140421	DongChengTianTan	22	0	0.9988	1.34	16.22	40.2	9.84
140422	DongChengTianTan	61	0	0.99648	2.42	18.28	36.6	11.06
140423	DongChengTianTan		0.46	0.9934	2.52	19.5	52.8	7.22
140424	DongChengTianTan		1.18	0.9969	1.7	19	60.2	5.88
140425	DongChengTianTan		0.6	0.99952	2.38	18.88	53.2	6.3
140426	DongChengTianTan		13.8	1.00296	2.64	14.18	63.6	7.74
140427	DongChengTianTan		0	1.00316	1.6	16.1	52	10.74
140428	DongChengTianTan		0	1.00196	1.5	17.52	45.6	11.18
140429	DongChengTianTan	59	0	0.99634	1.54	18.56	43.2	11.12
140430	DongChengTianTan	84	0	0.99214	1.74	20.08	47.6	10.56
140501	DongChengTianTan	128	0.26	0.99094	2.74	19.66	56	5.5
140502	DongChengTianTan	23	4.62	0.99832	3.58	14.86	35.2	8.1
140503	DongChengTianTan	38	0.02	0.99586	4.12	15.1	38.2	9.42
140504	DongChengTianTan	35	0	0.99996	4.52	12.36	21	11.08
140505	DongChengTianTan	20	0	1.00012	1.96	12.84	27.4	11.94
140506	DongChengTianTan	62	0	0.99142	2.04	15.24	39.6	8.04
140507	DongChengTianTan	75	0.86	0.9892	2.76	17.58	42.4	11.38
140508	DongChengTianTan	74	0	0.99658	2.32	16.58	47	9.08
140509	DongChengTianTan	67	0	0.99718	2.68	17.48	43.4	0.96
140510	DongChengTianTan	54	0.58	0.99842	2.12	16.4	49.6	1.78
140511	DongChengTianTan	29	23.5	0.98972	2.42	11.04	87	0.14
140512	DongChengTianTan		0.72	0.98414	2.54	19.6	53.8	11.84
140513	DongChengTianTan	54	0	0.9839	1.88	21.02	46.8	9.86
140514	DongChengTianTan		0	0.98842	3.3	18.18	26.4	8.48
140515	DongChengTianTan		0	0.98358	2.08	20.16	33.6	11.2
140516	DongChengTianTan		0.02	0.98968	2.66	22.54	29.8	12.06
140517	DongChengTianTan	60	0.26	0.9957	1.76	20.62	41.6	8.62
140518	DongChengTianTan	72	0.02	0.99192	1.54	22.26	45.8	10.34
140519	DongChengTianTan	110	2.74	0.98788	1.5	22.26	58.2	7.86
140520	DongChengTianTan	88	0	0.98746	2.24	24.2	45.2	12.08
140521	DongChengTianTan	105	0.02	0.98848	1.88	23.98	51.8	9.14
140522	DongChengTianTan	154	0	0.98944	2.18	26.8	45.6	11.04
140523	DongChengTianTan	77	0	0.9932	2.32	27.52	37.8	9.1
140524	DongChengTianTan	84	6.24	0.99124	1.56	20.3	81.4	0.64
140525	DongChengTianTan	82	0.02	0.98982	3	21.68	53.2	8.7
140526	DongChengTianTan	20	0	0.98372	3.2	24.44	29.6	12.28
140527	DongChengTianTan	37	0.04	0.97958	3.96	24.48	33.2	10.52
140528	DongChengTianTan	30	0	0.98452	1.98	26.82	30	12.44
140529	DongChengTianTan	50	0.02	0.9818	1.68	29.56	29.2	12.64
140530	DongChengTianTan	95	0.02	0.98868	2.2	28.74	36	10.74
140531	DongChengTianTan	108	0	0.99034	1.78	27.62	45	6.4
140601	DongChengTianTan	53	3.2	0.984633	2.16667	22.9	63.3333	2.23333
140602	DongChengTianTan	32	0.0333333	0.987133	2.23333	21.2	53	6.4
140603	DongChengTianTan	36	0	0.983967	2.6	23.7333	49.3333	12.0667
140604	DongChengTianTan	52	0.0666667	0.982333	0.966667	23.8333	55	8.03333
140605	DongChengTianTan	64	0	0.981	1.76667	25.4333	55.6667	11.3333
140606	DongChengTianTan	67	39.6667	0.980633	2.36667	21.3333	70.3333	3.53333
140607	DongChengTianTan	10	2.73333	0.980233	2.03333	21.0333	57	12.6667
140608	DongChengTianTan	34	1.4	0.978267	1.4	20.7	61	8.36667
140609	DongChengTianTan	34	0.9	0.980767	1.66667	20.9333	60.3333	9.76667
140610	DongChengTianTan	68	0.433333	0.984533	1.2	20.7	68.3333	5.03333
140611	DongChengTianTan	48	0.2	0.9858	1.5	22.1667	61.3333	11.1667
140612	DongChengTianTan	29	0.0333333	0.9827	1.93333	25.3333	50	11.5667
140613	DongChengTianTan	62	1	0.983333	1.3	24.6333	61	8.06667
140614	DongChengTianTan	33	0.4	0.9827	1.36667	24.9333	60	12.6333
140615	DongChengTianTan	117	1.66667	0.9807	1.73333	25.5667	60.6667	4.93333
140616	DongChengTianTan	129	0.5	0.9789	1.9	24.7333	65	3.43333
140617	DongChengTianTan	101	8.26667	0.978267	1.4	23.4	70.6667	3.6
140618	DongChengTianTan	66	2.63333	0.9791	1.66667	23.1667	66.6667	8.3
140619	DongChengTianTan	140	0.0666667	0.9806	1.26667	23.0333	66.6667	4.63333
140620	DongChengTianTan	47	24.3	0.982767	2	21.8	73.3333	7.56667
140621	DongChengTianTan	75	6.53333	0.984133	1.5	21.8667	71.6667	8.03333
140622	DongChengTianTan	37	16.4	0.984833	1.1	20.8	77.3333	4.7
140623	DongChengTianTan	27	0	0.9839	1.43333	23.4667	61.6667	12.8667
140624	DongChengTianTan	52	0	0.980733	1.63333	25.4333	57.3333	11.0667
140625	DongChengTianTan	92	4.53333	0.9798	1.3	22.8	77.3333	0.433333
140626	DongChengTianTan	148	2.1	0.979367	1.43333	24.8333	72	8.63333
140627	DongChengTianTan	26	0.633333	0.982933	1.63333	26.1	52.3333	12.8333
140628	DongChengTianTan	21	0	0.982067	1.43333	26.7	43.6667	12.7333
140629	DongChengTianTan	55	0	0.9821	1.16667	27.1	52	9.3
140630	DongChengTianTan	79	0	0.982267	1.4	27.2667	52	9.03333
140701	DongChengTianTan	107	24.6	0.98435	1.825	25.825	64.5	1.325
140702	DongChengTianTan	58	39.975	0.9826	1.225	22.5	85	1.55
140703	DongChengTianTan	191	0.2	0.9806	1.125	24.85	79	2.375
140704	DongChengTianTan	216	0.05	0.9839	1.7	26.55	72	6.675
140705	DongChengTianTan	115	0.8	0.9862	1.525	26.5	72.25	4.55
140706	DongChengTianTan	201	0	0.984525	1.35	26.825	72.25	2.325
140707	DongChengTianTan	166	5.45	0.982525	1.6	26.75	73	0
140708	DongChengTianTan	135	0.675	0.981875	2.1	27.025	60.25	6.65
140709	DongChengTianTan	23	0	0.983975	1.4	25.8	50.75	3.175
140710	DongChengTianTan	28	0	0.97995	1.775	27.75	47	12.7
140711	DongChengTianTan	34	0	0.97965	2.125	27.775	46.75	12.5
140712	DongChengTianTan	13	0.025	0.9821	2.125	27.375	39.5	12.225
140713	DongChengTianTan	17	5.85	0.98215	2.475	26.2	50	11.175
140714	DongChengTianTan	31	0	0.982175	1.6	26.95	50.5	10.85
140715	DongChengTianTan	41	0.175	0.983425	2.4	26.175	55	8.625
140716	DongChengTianTan	116	3.625	0.983	1.5	24.95	71	3.075
140717	DongChengTianTan	133	0.85	0.98505	1.4	25.375	75	3.125
140718	DongChengTianTan	137	0	0.9865	1.4	28.25	71.25	5.4
140719	DongChengTianTan	67	0	0.987725	1.8	30.325	66.25	10.55
140720	DongChengTianTan	64	1.075	0.98475	2.05	30.15	66.25	10.425
140721	DongChengTianTan	33	3.95	0.981925	2.325	28.15	62.25	3.65
140722	DongChengTianTan	14	0.125	0.986	1.275	25.625	61.25	0.2
140723	DongChengTianTan	24	0.025	0.983925	1.6	24.775	65	1.075
140724	DongChengTianTan	67	0.175	0.98495	1.15	25.575	66.5	2.25
140725	DongChengTianTan	70	0	0.985325	1.375	26.575	58.5	11.85
140726	DongChengTianTan	107	0	0.9876	1.825	27.775	54.75	11.775
140727	DongChengTianTan	105	0	0.98775	1.775	28.4	51.5	10.875
140728	DongChengTianTan	113	0	0.983725	1.675	28.575	59	10.4
140729	DongChengTianTan		0	0.982625	2.5	28.5	59	4.825
140730	DongChengTianTan	106	19.05	0.984825	1.75	24.65	77.75	2.55
140731	DongChengTianTan	196	0.025	0.98625	1.725	26.625	72	5.1
130801	XiChengGuanYuan	207	17.96	0.98786	1.5	23.16	86.2	2.28
130802	XiChengGuanYuan	33	0.28	0.98996	1.52	25.14	79.6	6.78
130803	XiChengGuanYuan	47	0.88	0.98866	1.8	25.96	71.4	11.3
130804	XiChengGuanYuan	21	5.34	0.98532	1.88	26.46	78.6	6.14
130805	XiChengGuanYuan	43	9.1	0.98312	1.28	24.66	80	11.68
130806	XiChengGuanYuan	105	0	0.98388	1.16	28.36	82.2	4.32
130807	XiChengGuanYuan	70	22.98	0.98664	1.94	24.9	84.4	0.46
130808	XiChengGuanYuan	29	0.72	0.98558	1.78	25.92	77.8	9.04
130809	XiChengGuanYuan	31	0.08	0.98598	1.46	27.38	71.8	11.36
130810	XiChengGuanYuan	63	0	0.98932	1.84	28.78	74.8	9.68
130811	XiChengGuanYuan	127	7.9	0.99088	1.76	27.34	84.8	1.04
130812	XiChengGuanYuan	84	5.68	0.9899	1.72	25.46	85	4.24
130813	XiChengGuanYuan	69	0	0.98954	1.46	27.44	80.4	7.4
130814	XiChengGuanYuan	77	4.2	0.98888	2.18	27.34	77.4	8.74
130815	XiChengGuanYuan	84	0	0.98756	1.48	29	80.8	1.6
130816	XiChengGuanYuan	114	2.7	0.98246	1.9	29.26	81	3.54
130817	XiChengGuanYuan	130	0	0.98572	2.46	29.32	55.8	11.4
130818	XiChengGuanYuan	17	0	0.9925	1.94	27.14	50.8	10.92
130819	XiChengGuanYuan	23	0	0.99478	1.34	26.04	60.4	11.22
130820	XiChengGuanYuan	80	2.24	0.99386	1.76	25.84	69	5.14
130821	XiChengGuanYuan	114	0.26	0.99254	1.12	25.6	72.6	5.56
130822	XiChengGuanYuan	108	0.06	0.9933	1.2	24.32	79	0.86
130823	XiChengGuanYuan	87	0.02	0.99374	1.4	25.64	65.8	8.46
130824	XiChengGuanYuan	31	0	0.9939	1.52	25.66	62.4	9.3
130825	XiChengGuanYuan	33	0	0.99168	1.64	26.4	60.8	11.64
130826	XiChengGuanYuan	40	0	0.99028	1.88	26.32	62.2	11.04
130827	XiChengGuanYuan	68	1.3	0.99162	2	24.78	76	1.84
130828	XiChengGuanYuan	61	13.32	0.98474	1.56	23.98	85.6	0
130829	XiChengGuanYuan	63	0	0.9871	3.58	23.12	59	9.76
130830	XiChengGuanYuan	8	0.38	0.99626	2.46	20.86	54.4	10.36
130831	XiChengGuanYuan	18	0	0.99662	1.4	21.44	53.4	11.34
130901	XiChengGuanYuan	34	0	0.99485	1.725	21.375	61	9.925
130902	XiChengGuanYuan	42	0.75	0.996725	1.775	21.25	68.75	9.55
130903	XiChengGuanYuan	92	0	0.9974	1.575	21.5	72	6.85
130904	XiChengGuanYuan	83	8.35	0.997175	1.5	19.375	85.75	0
130905	XiChengGuanYuan	30	17.725	0.995775	2.05	19.5	76.75	8.85
130906	XiChengGuanYuan	39	0.1	0.997225	1.675	19.375	77.75	5.7
130907	XiChengGuanYuan	87	0	0.997925	1.5	20.375	75.75	7.7
130908	XiChengGuanYuan	69	0.6	0.9977	1.5	20.975	81	1.9
130909	XiChengGuanYuan	104	3.175	0.99465	1.775	19.975	80	3.55
130910	XiChengGuanYuan	88	0.425	0.99395	1.575	20.375	69.75	9.5
130911	XiChengGuanYuan	30	0	0.996	1.425	20.15	70.5	10.75
130912	XiChengGuanYuan	90	1.175	0.9933	1.725	21.275	78.25	4
130913	XiChengGuanYuan	116	2.525	0.987875	1.875	20.1	85.5	3.4
130914	XiChengGuanYuan	86	9.4	0.989875	1.525	21.5	69	8.425
130915	XiChengGuanYuan	18	0	0.99485	1.6	19.325	58.5	9.025
130916	XiChengGuanYuan	39	0	0.99285	1.2	19.725	75.25	5.075
130917	XiChengGuanYuan	61	4.875	0.99565	1.475	20.525	84.75	1.625
130918	XiChengGuanYuan	97	5	0.999425	2.125	21.725	81.25	4
130919	XiChengGuanYuan	101	1.65	0.994825	1.525	21.075	80.25	3.65
130920	XiChengGuanYuan	115	0	0.99675	1.2	21.15	69	7.6
130921	XiChengGuanYuan	28	0	0.99685	1.35	21.35	69.5	6.225
130922	XiChengGuanYuan	48	0.05	0.996275	1.275	20.125	77	0.4
130923	XiChengGuanYuan	38	17.075	0.999375	3.1	14.775	74.75	0.775
130924	XiChengGuanYuan	12	0.025	1.00323	2	12.625	64	8.975
130925	XiChengGuanYuan		0	1.00242	2.3	13.8	53	10.75
130926	XiChengGuanYuan	35	0	0.9983	1.65	15.575	56.25	10.525
130927	XiChengGuanYuan	119	0	0.9931	1.975	16.45	61	8.9
130928	XiChengGuanYuan	242	0	0.9921	1.7	16.025	74.5	3.875
130929	XiChengGuanYuan	254	0	0.998075	1.35	16.625	83.25	0.55
130930	XiChengGuanYuan	217	0	0.9998	1.125	17.975	83.25	0.875
131001	XiChengGuanYuan	164	7.76	1.00118	2.02	17.14	80.6	3.78
131002	XiChengGuanYuan	23	0	1.00554	2.12	14.74	60.4	10.22
131003	XiChengGuanYuan	60	0	1.00202	1.88	15.44	66.8	9.28
131004	XiChengGuanYuan	114	0	0.99818	1.58	16.18	75.2	4.26
131005	XiChengGuanYuan	272	0	1.00322	1.34	17.34	74	5.22
131006	XiChengGuanYuan	290	0	1.00624	1.54	16.82	80.6	3.4
131007	XiChengGuanYuan	124	0	1.00644	1.98	17.24	66.4	7.7
131008	XiChengGuanYuan	49	2.04	1.00414	1.78	16.3	64.6	7.86
131009	XiChengGuanYuan	105	0	0.99518	1.4	15.76	76.6	3.4
131010	XiChengGuanYuan	117	0	0.99504	2.86	16	58.4	7
131011	XiChengGuanYuan	36	0	0.9995	1.7	14.14	56	9.74
131012	XiChengGuanYuan	75	0.02	1.00188	1.88	15.62	61.6	6.18
131013	XiChengGuanYuan	60	3.5	1.00234	2.32	14.2	73	0.46
131014	XiChengGuanYuan	62	2.94	1.01002	2.54	11.54	63.4	0.84
131015	XiChengGuanYuan	14	0	1.0147	1.48	7.74	53.6	9.88
131016	XiChengGuanYuan	32	0	1.00966	1.7	9.68	58.8	9.34
131017	XiChengGuanYuan	76	0	1.01004	1.38	10.4	64.6	8.76
131018	XiChengGuanYuan		0.02	1.00884	1.42	10.62	72.8	3.52
131019	XiChengGuanYuan		0.62	1.00944	2.78	12.38	50.6	5.08
131020	XiChengGuanYuan		0	1.0092	1.44	10.36	54.2	9.14
131021	XiChengGuanYuan		0	1.007	1.26	10.34	62.8	7.74
131022	XiChengGuanYuan		2.44	1.00582	1.9	10.68	71	4.04
131023	XiChengGuanYuan		0.04	1.006	2.62	8.64	48	9
131024	XiChengGuanYuan		0	1.01088	3.06	8.64	41.8	8.7
131025	XiChengGuanYuan		0	1.01134	1.6	8.16	62	8.78
131026	XiChengGuanYuan		0	1.0069	1.44	8.14	62.8	8.62
131027	XiChengGuanYuan		0	1.00182	1.1	8.32	69.6	5.76
131028	XiChengGuanYuan		0.04	1.00332	1.54	10.32	72.6	2.28
131029	XiChengGuanYuan		0	1.01148	2.48	9.48	58.2	8.92
131030	XiChengGuanYuan		0	1.01178	1.36	7.24	69	8.18
131031	XiChengGuanYuan		0	1.01132	0.9	7.06	73.6	1.82
131101	XiChengGuanYuan	188	0.14	1.00996	0.9	7.6	80.2	0.16
131102	XiChengGuanYuan	233	0	1.00622	1.44	8.78	85.2	1.96
131103	XiChengGuanYuan	83	0.16	1.00838	3	10.48	59.8	8.76
131104	XiChengGuanYuan	24	0	1.01204	1.4	8.26	56.8	9
131105	XiChengGuanYuan	150	0.02	1.00466	1.48	9.88	60.4	1.86
131106	XiChengGuanYuan	127	0	1.00138	3.3	8.94	55	7.38
131107	XiChengGuanYuan		0	1.0049	2.16	6.7	43.4	8.9
131108	XiChengGuanYuan	64	0	1.00404	1.46	6.9	56.2	6.36
131109	XiChengGuanYuan	116	0.64	1.00718	2.14	8.52	57	0.76
131110	XiChengGuanYuan	15	0	1.0134	3.94	3.28	21.2	8.7
131111	XiChengGuanYuan	31	0	1.0121	2.08	4.96	37.4	8.64
131112	XiChengGuanYuan	66	0	1.00882	1.74	5.86	49.2	8.72
131113	XiChengGuanYuan	155	0	1.00484	1.4	5.1	65	0.82
131114	XiChengGuanYuan	74	0	1.00268	2.58	6.44	47.4	7.36
131115	XiChengGuanYuan	98	0	1.00132	1.54	5.92	47.8	8
131116	XiChengGuanYuan	52	0	1.00272	4.02	7.14	36.4	7.84
131117	XiChengGuanYuan	10	0	1.00824	3.34	3.38	36.4	8.64
131118	XiChengGuanYuan	11	0	1.01024	3.1	2.06	34.8	8.44
131119	XiChengGuanYuan	28	0	1.00856	2.6	1.34	35.6	8.2
131120	XiChengGuanYuan	72	0	1.00726	1.28	1.56	51.4	7.86
131121	XiChengGuanYuan		0	1.00968	1.3	1.9	57.2	7.66
131122	XiChengGuanYuan	130	0	1.00852	1.44	3.08	56.2	6.98
131123	XiChengGuanYuan	225	0	1.00418	1.48	3.86	63.2	4.52
131124	XiChengGuanYuan	117	0.04	0.99974	2.58	5.02	56	0.36
131125	XiChengGuanYuan		0	1.00102	3.2	2.74	34.4	8.34
131126	XiChengGuanYuan	19	0	1.00238	3.56	0.18	35.6	7.74
131127	XiChengGuanYuan	9	0	1.01054	6.24	-3.5	20	7.94
131128	XiChengGuanYuan	16	0	1.01052	3.14	-2.74	25.8	8.08
131129	XiChengGuanYuan	78	0	1.00456	1.82	1.16	40	8.24
131130	XiChengGuanYuan	73	0	1.00644	2.52	2.44	38.4	8.14
131201	XiChengGuanYuan	87	0	1.00438	1.675	0.2	55.75	7.625
131202	XiChengGuanYuan	110	0	0.999975	1.375	0.9	54.5	6.375
131203	XiChengGuanYuan	84	0	1.00277	1.55	2.525	48.5	7.9
131204	XiChengGuanYuan	111	0	1.00083	1.375	2.55	51.5	6.05
131205	XiChengGuanYuan	49	0	1.0042	2.75	3.275	40.5	8.025
131206	XiChengGuanYuan	116	0	1.0005	2.15	1.35	58.75	6.4
131207	XiChengGuanYuan	240	0	1.0002	1.3	0.175	72.75	2.5
131208	XiChengGuanYuan	247	0	1.0013	2.55	1.9	70.75	0.45
131209	XiChengGuanYuan	44	0	1.00445	3.4	-0.175	40.25	7.85
131210	XiChengGuanYuan	20	0	1.00015	3.45	-1.225	43	5.65
131211	XiChengGuanYuan	20	0	1.00033	2.65	-1.575	38	6.75
131212	XiChengGuanYuan	22	0	1.00125	4.4	-3.15	31.5	7.95
131213	XiChengGuanYuan	57	0	1.0059	1.7	-5.65	38.5	7.2
131214	XiChengGuanYuan	58	0	1.00878	2.05	-4.35	39.75	7.25
131215	XiChengGuanYuan	43	0	1.0132	1.275	-3.05	39.25	6.55
131216	XiChengGuanYuan	123	0	1.01087	1.025	-3.275	50.5	2.125
131217	XiChengGuanYuan	105	0.95	1.01278	2.65	-3	61.75	2.125
131218	XiChengGuanYuan	30	0	1.01272	2.4	-7.675	55	7.475
131219	XiChengGuanYuan	48	0	1.01093	2.7	-6.95	51.25	7.7
131220	XiChengGuanYuan	43	0	1.01442	2.7	-5.775	49	7.55
131221	XiChengGuanYuan	50	0	1.0153	1.65	-5.325	48.75	6.75
131222	XiChengGuanYuan	125	0	1.01225	1.1	-5.275	55	4.275
131223	XiChengGuanYuan	139	0	1.0121	1.525	-4.75	57	6.275
131224	XiChengGuanYuan	227	0	1.0139	1.2	-5.05	68	1.675
131225	XiChengGuanYuan	199	0	1.00855	2.35	-4.375	63.75	2.625
131226	XiChengGuanYuan	12	0	1.01435	4.6	-4.775	32	7.725
131227	XiChengGuanYuan	20	0	1.01073	2.05	-6.025	41.5	6.2
131228	XiChengGuanYuan	16	0	1.00685	3.3	-5.175	36.5	7.725
131229	XiChengGuanYuan	52	0	1.0002	2.85	-2.975	34.5	7.6
131230	XiChengGuanYuan	43	0	0.9968	2.45	-2.375	37.75	7.675
131231	XiChengGuanYuan	67	0	0.99335	3.225	0.2	36.75	7.175
140101	XiChengGuanYuan	39	0	0.99848	1.94	1.12	38	7.54
140102	XiChengGuanYuan	103	0	1.00168	1.36	-0.36	53.8	6.38
140103	XiChengGuanYuan	104	0	1.00562	2.6	1.44	42.2	7.84
140104	XiChengGuanYuan	45	0	1.00576	1.46	-2.3	65.4	5.12
140105	XiChengGuanYuan	85	0	1.00752	2.4	-1.6	57	7.68
140106	XiChengGuanYuan	109	0.02	1.009	1.2	-2.32	78	0.24
140107	XiChengGuanYuan	119	0	1.00992	2.6	-0.62	54	2.86
140108	XiChengGuanYuan	14	0	1.01642	3.16	-3.92	29.4	6.68
140109	XiChengGuanYuan	23	0	1.01496	1.64	-7.28	34.2	7.38
140110	XiChengGuanYuan	58	0	1.01394	1.36	-6.08	43	7.04
140111	XiChengGuanYuan	114	0	1.0139	1.72	-4.9	50.8	4.4
140112	XiChengGuanYuan	46	0	1.01896	2.74	-3.22	27.4	8.18
140113	XiChengGuanYuan	75	0	1.0152	1.64	-5.1	46.2	7.02
140114	XiChengGuanYuan	103	0	1.01688	1.48	-5.56	51.2	7.32
140115	XiChengGuanYuan	108	0	1.01446	1.24	-4.68	56.8	5.56
140116	XiChengGuanYuan	416	0	1.01096	2.06	-2.02	63	2.26
140117	XiChengGuanYuan	196	0	1.01456	2.22	-1.78	64.6	4.1
140118	XiChengGuanYuan	136	0	1.0161	1.84	-2.68	54.8	6.62
140119	XiChengGuanYuan	137	0	1.00824	2.66	-1.54	54.6	2.3
140120	XiChengGuanYuan	11	0	1.01286	4.32	-1.92	27.6	8.38
140121	XiChengGuanYuan	12	0	1.01562	2.32	-4.2	33.4	8.28
140122	XiChengGuanYuan	114	0	1.00704	1.16	-3.24	37.6	7.32
140123	XiChengGuanYuan	162	0	1.00026	1.42	-3.5	48.6	1.66
140124	XiChengGuanYuan	205	0	1.00086	1.92	1.44	37.4	0
140125	XiChengGuanYuan		0	1.01028	2.3	0.34	34.4	6.76
140126	XiChengGuanYuan	20	0	1.01252	1.48	-3.16	58.8	7.5
140127	XiChengGuanYuan	105	0	1.00268	2.54	-0.62	51.4	5.9
140128	XiChengGuanYuan	30	0	1.01124	2.34	-1.36	40.6	7.08
140129	XiChengGuanYuan	99	0	0.99834	1.62	-2.38	62.2	3.4
140130	XiChengGuanYuan	76	0	1.00128	2.84	0.34	44.4	8
140131	XiChengGuanYuan	139	0	1.00232	2	-1.5	70.6	0.38
140201	XiChengGuanYuan	139	0.06	0.99964	1.52	0.82	81.8	0.68
140202	XiChengGuanYuan	92	0	0.99854	3.78	2.7	50.8	7.16
140203	XiChengGuanYuan	7	0	1.01012	4.32	-2.48	18.6	8.44
140204	XiChengGuanYuan	17	0	1.01284	2.1	-5.88	20.6	7.02
140205	XiChengGuanYuan	90	0	1.01152	1.46	-4.18	37.4	3.26
140206	XiChengGuanYuan	116	0.02	1.01246	1.78	-3.54	54.2	1.82
140207	XiChengGuanYuan	93	2.66	1.01004	1.8	-3.26	77.4	0
140208	XiChengGuanYuan	64	0.52	1.01082	3.14	-3.94	60	7.14
140209	XiChengGuanYuan	9	0	1.01942	3.78	-7.48	36	8.82
140210	XiChengGuanYuan	15	0	1.01812	1.42	-7.64	43	8.64
140211	XiChengGuanYuan	86	0	1.01154	1.82	-6.28	52	7.86
140212	XiChengGuanYuan	128	0	1.0152	1.48	-4.46	52.4	7.76
140213	XiChengGuanYuan	170	0.04	1.01746	1.6	-3.62	67.4	1.36
140214	XiChengGuanYuan	231	0.02	1.00954	1.3	-3.08	70	2.02
140215	XiChengGuanYuan	395	0	1.00752	1.22	-2.08	69.6	0.68
140216	XiChengGuanYuan	351	0	1.01192	1.72	-0.36	61.8	3.8
140217	XiChengGuanYuan	100	0	1.01766	2.02	0.3	42	3.14
140218	XiChengGuanYuan	59	0.06	1.01514	1.88	-2.16	55.8	2.88
140219	XiChengGuanYuan	61	0.14	1.0121	1.62	-2.14	58.8	8.3
140220	XiChengGuanYuan	177	0.04	1.01326	1.44	-2.16	74.8	2.16
140221	XiChengGuanYuan	254	0	1.01128	1.18	-1.02	73.8	0.66
140222	XiChengGuanYuan	256	0	1.01278	1.52	1.1	70.8	0.24
140223	XiChengGuanYuan	187	0	1.01376	1.66	0.86	74.6	0
140224	XiChengGuanYuan	251	0	1.01092	1	2.52	69.2	0.26
140225	XiChengGuanYuan	390	0	1.00932	1.06	3.36	70.8	0.12
140226	XiChengGuanYuan	437	0.74	1.00632	2.28	4.54	76	0.82
140227	XiChengGuanYuan	25	0.46	1.0122	4.2	2.94	33.6	10.1
140228	XiChengGuanYuan	73	0.02	1.00988	1.74	0.18	58	1.7
140301	XiChengGuanYuan	70	0	1.00722	1.98	2.28	45.2	9
140302	XiChengGuanYuan	129	0	1.00564	1.96	2.1	49.4	7.56
140303	XiChengGuanYuan	209	0	1.0049	1.62	1.28	65.4	0
140304	XiChengGuanYuan	94	0.02	1.00942	3.3	3.88	31.8	10.26
140305	XiChengGuanYuan	17	0	1.01188	2.58	1.56	29.8	9.24
140306	XiChengGuanYuan	14	0	1.01334	2.62	1.02	21.8	10.18
140307	XiChengGuanYuan	50	0	1.01282	1.86	1.08	35.4	8.52
140308	XiChengGuanYuan	131	0	1.00684	1.9	3.08	46.6	6.14
140309	XiChengGuanYuan	101	0	1.00926	2.22	2.72	45.2	8.88
140310	XiChengGuanYuan	70	0	1.007	1.72	2.66	61	6.74
140311	XiChengGuanYuan	172	0	1.0012	2.16	5.94	55.2	3.52
140312	XiChengGuanYuan	16	0.08	1.0089	3.72	5.9	24.8	8.28
140313	XiChengGuanYuan	19	0	1.00594	2.34	5.08	23.2	9.74
140314	XiChengGuanYuan	20	0	1.00232	3.22	9.06	17.4	10.64
140315	XiChengGuanYuan	44	0	0.99484	2.22	11.48	27	9.06
140316	XiChengGuanYuan	114	0	0.9983	2.92	10.22	38.8	7.86
140317	XiChengGuanYuan	113	0	0.9962	3.14	11.64	41.6	6.06
140318	XiChengGuanYuan	33	0	1.00584	2.66	10.2	33	6.26
140319	XiChengGuanYuan	53	0.14	1.00628	1.94	6.78	51	2.24
140320	XiChengGuanYuan	12	0	1.01064	3.34	10.14	21.8	10.9
140321	XiChengGuanYuan	22	0	1.00482	2	11.82	25.2	10.44
140322	XiChengGuanYuan	46	0	1.00166	2.76	13.5	26.2	10.4
140323	XiChengGuanYuan	110	0	1.00702	1.8	11.88	38.6	7.64
140324	XiChengGuanYuan	205	0	0.99814	2.22	13.04	48	7.38
140325	XiChengGuanYuan	200	0	0.9946	1.58	14.42	50	5.96
140326	XiChengGuanYuan	177	0	0.99442	2.02	16.02	56.4	7.26
140327	XiChengGuanYuan	250	0	0.99496	1.92	14.48	65.8	1
140328	XiChengGuanYuan	117	3.72	0.99202	1.86	14.86	64.2	3.98
140329	XiChengGuanYuan	55	0	0.99706	1.82	14.4	54.6	9.76
140330	XiChengGuanYuan	38	0	0.99956	1.76	16.52	40.2	10.06
140331	XiChengGuanYuan	125	0.38	0.9994	2.1	16.54	47.4	0.42
140401	XiChengGuanYuan	125	0.04	0.99662	1.56	15.3	54.6	9.24
140402	XiChengGuanYuan	105	0.02	0.9986	2.36	15.82	42.8	5.68
140403	XiChengGuanYuan	39	0	1.00756	4.14	12.78	25.6	10.94
140404	XiChengGuanYuan	34	0	0.99938	4.06	13.82	25.2	10.54
140405	XiChengGuanYuan	24	0	1.00648	2.94	11.9	25	11.2
140406	XiChengGuanYuan	56	0	1.00228	2.78	15.12	26.8	10.82
140407	XiChengGuanYuan	85	0	0.99738	1.9	16.02	35.6	9.82
140408	XiChengGuanYuan	41	0	0.9974	1.98	17.2	44.8	8.42
140409	XiChengGuanYuan	126	0	0.99528	3.74	20.56	40.6	9.14
140410	XiChengGuanYuan	105	0.02	1.00534	2.16	15.08	33.6	0
140411	XiChengGuanYuan	63	0.08	1.00276	1.8	13.44	42	1.3
140412	XiChengGuanYuan	90	0	0.99996	1.4	13.88	44.4	8.44
140413	XiChengGuanYuan	145	0	1.001	1.7	15.76	52.2	8.92
140414	XiChengGuanYuan	210	0	1.00034	2.22	18.7	57	8.48
140415	XiChengGuanYuan	37	0	1.0027	2.72	16.86	51	2.24
140416	XiChengGuanYuan	54	0	0.99804	1.56	16.12	33.4	1.64
140417	XiChengGuanYuan	95	5.18	0.99614	1.66	13.38	69	1.58
140418	XiChengGuanYuan	153	0	1.00288	1.74	14.42	68.6	3.52
140419	XiChengGuanYuan	51	1.4	1.00452	1.34	12.26	58.6	1.3
140420	XiChengGuanYuan	58	0.02	1.0009	1.62	13.58	53.4	9
140421	XiChengGuanYuan	36	0	1.00018	1.44	16.52	43.4	10
140422	XiChengGuanYuan	64	0	0.99788	2.6	18.42	39.8	10.86
140423	XiChengGuanYuan		0.46	0.99472	2.96	19.7	54	7.78
140424	XiChengGuanYuan		0.52	0.99808	2.32	19.5	57.4	6.68
140425	XiChengGuanYuan		0.6	1.00054	2.62	19.34	52.2	6.06
140426	XiChengGuanYuan		12.24	1.0042	2.76	13.98	67	7.26
140427	XiChengGuanYuan		0	1.00442	1.88	15.88	56	10.26
140428	XiChengGuanYuan		0	1.00326	1.76	17.46	47.8	11.14
140429	XiChengGuanYuan	87	0	0.9976	1.74	18.86	43.2	10.94
140430	XiChengGuanYuan	108	0	0.99342	2.02	20.5	46.6	10.52
140501	XiChengGuanYuan	140	0.08	0.99212	3.1	20.22	54.6	6.08
140502	XiChengGuanYuan	31	3.86	0.9999	4.28	15.28	33.8	9.2
140503	XiChengGuanYuan	50	0.02	0.99728	4.72	15.72	35.8	8.92
140504	XiChengGuanYuan	32	0	1.00168	5.1	12.52	21.2	11.24
140505	XiChengGuanYuan	21	0	1.00156	2.16	13.1	27.6	11.84
140506	XiChengGuanYuan	69	0	0.99244	2.4	15.72	40.2	7.78
140507	XiChengGuanYuan	72	0.12	0.99034	3.16	17.8	43	11.38
140508	XiChengGuanYuan	73	0	0.99784	2.58	16.84	49	9.18
140509	XiChengGuanYuan	67	0	0.99792	3.24	17.64	45.8	2.08
140510	XiChengGuanYuan	52	0.68	0.99936	2.42	16.42	53.2	1.12
140511	XiChengGuanYuan	29	24.12	0.99086	2.66	11.2	88.4	0.14
140512	XiChengGuanYuan	28	0.08	0.9857	3.04	20.14	52	11.7
140513	XiChengGuanYuan	57	0	0.98528	2.38	21.56	45.6	9.78
140514	XiChengGuanYuan	15	0	0.9899	4.08	18.2	25.4	8.26
140515	XiChengGuanYuan	53	0	0.9848	2.32	20.48	33.2	10.84
140516	XiChengGuanYuan	53	0.02	0.99082	2.52	22.28	33.2	11.8
140517	XiChengGuanYuan	59	0.26	0.99686	2.18	20.78	41.6	8.42
140518	XiChengGuanYuan	75	0.02	0.9931	1.88	22.56	46.8	10.46
140519	XiChengGuanYuan	112	2.22	0.98898	1.7	22.86	56.4	8.08
140520	XiChengGuanYuan	89	0	0.98862	2.48	24.26	47.8	11.68
140521	XiChengGuanYuan	107	0.02	0.9897	2.1	24.32	53.6	9.2
140522	XiChengGuanYuan	151	0	0.99062	2.44	27.2	44.6	11.3
140523	XiChengGuanYuan	76	0	0.99434	2.74	27.72	37.8	9.2
140524	XiChengGuanYuan	83	5.72	0.99222	1.66	20.76	82.2	0.64
140525	XiChengGuanYuan	79	0.02	0.99122	2.98	22.18	52.8	7.88
140526	XiChengGuanYuan	18	0	0.98522	3.64	25.22	27.6	12.04
140527	XiChengGuanYuan	32	0.04	0.98102	4.32	25.06	32.2	10.76
140528	XiChengGuanYuan	24	0	0.98574	2.5	27.44	28.4	12.36
140529	XiChengGuanYuan	38	0	0.98304	1.9	29.82	28.2	12.58
140530	XiChengGuanYuan	85	0	0.98958	2.7	28.76	37.8	10.52
140531	XiChengGuanYuan	104	0.02	0.99152	2.34	27.44	48.8	5.98
140601	XiChengGuanYuan	53	5.63333	0.986333	2.63333	22.6333	68.3333	2.23333
140602	XiChengGuanYuan	33	0	0.989133	2.5	20.6667	58.3333	5.66667
140603	XiChengGuanYuan	36	0	0.986067	2.63333	23.5667	51	11.9333
140604	XiChengGuanYuan	52	0.0666667	0.9845	1.2	23.5333	58	6.7
140605	XiChengGuanYuan	63	0	0.9831	2.23333	25.6667	58.3333	11.2667
140606	XiChengGuanYuan	67	29.2667	0.982433	2.86667	21.8333	71.3333	3.6
140607	XiChengGuanYuan	12	0.566667	0.9824	2.56667	21.1667	58.3333	13
140608	XiChengGuanYuan	29	2.6	0.980167	1.43333	21.1667	60.6667	7
140609	XiChengGuanYuan	34	0	0.9826	2.2	22.1	58.3333	11.2667
140610	XiChengGuanYuan	65	1.9	0.9863	1.8	21.6667	68.3333	5.6
140611	XiChengGuanYuan	57	0.0333333	0.9879	1.7	22.1	63.6667	10.4667
140612	XiChengGuanYuan	28	0.0333333	0.984733	2.23333	25.7667	49.3333	12.1
140613	XiChengGuanYuan	64	0.8	0.985433	1.96667	25.4	59	10.0333
140614	XiChengGuanYuan	35	0.8	0.984733	1.6	25.4333	60.3333	12.2
140615	XiChengGuanYuan	109	1.66667	0.9827	2.7	26.0667	58.6667	4.43333
140616	XiChengGuanYuan	138	0.5	0.9809	2.56667	24.9	66	5.53333
140617	XiChengGuanYuan	103	9.46667	0.980133	1.7	23.7	71.3333	2.46667
140618	XiChengGuanYuan	74	0	0.9813	2	23.1333	71	4.26667
140619	XiChengGuanYuan	141	0	0.982467	1.83333	22.8	71.6667	2.06667
140620	XiChengGuanYuan	53	7.53333	0.9847	2.6	21.4	74.6667	6.26667
140621	XiChengGuanYuan	79	6.5	0.9861	2	21.8667	73.6667	7.9
140622	XiChengGuanYuan	38	2.63333	0.986967	1.66667	21.4667	74.6667	6.76667
140623	XiChengGuanYuan	28	0.0333333	0.986067	1.36667	23.4333	64	12.4667
140624	XiChengGuanYuan	44	0	0.982767	2.06667	25.6333	57.6667	10.9333
140625	XiChengGuanYuan	102	5.03333	0.981833	1.63333	22.9333	79	0
140626	XiChengGuanYuan	133	0.0333333	0.9815	1.93333	25.4	71.3333	9.8
140627	XiChengGuanYuan	17	1.43333	0.9851	2.23333	26.3	51.3333	12
140628	XiChengGuanYuan	19	0	0.9842	1.83333	27.0667	44	13.1333
140629	XiChengGuanYuan	39	0	0.984033	1.43333	27.4333	53	8.06667
140630	XiChengGuanYuan	67	0	0.9843	1.7	27.7	50.3333	9.03333
140701	XiChengGuanYuan	97	11.25	0.98555	1.925	26.5	62	1.9
140702	XiChengGuanYuan	53	22.5	0.983875	1.6	23.15	83.5	1.55
140703	XiChengGuanYuan	172	0.025	0.9821	1.3	25.275	77.5	2.275
140704	XiChengGuanYuan	198	7.25	0.9853	1.8	26.7	73.5	6.175
140705	XiChengGuanYuan	112	0	0.98765	1.45	26.55	73.5	4.7
140706	XiChengGuanYuan	175	0	0.985925	1.525	27.125	72.25	4.3
140707	XiChengGuanYuan	158	5.425	0.983875	2.175	27.35	71.25	0
140708	XiChengGuanYuan	120	0	0.983275	2.425	27.725	58.5	5.575
140709	XiChengGuanYuan	25	0	0.9855	1.6	26.3	51.5	2.275
140710	XiChengGuanYuan		0	0.98175	2.25	27.75	48	12.1
140711	XiChengGuanYuan		0	0.981225	2.35	27.825	48	11.425
140712	XiChengGuanYuan	12	0	0.9835	2.375	27.5	42.5	11.25
140713	XiChengGuanYuan	16	5.825	0.983675	2.6	26.575	50.5	11.55
140714	XiChengGuanYuan	28	0	0.983575	1.975	27.45	50.5	10.225
140715	XiChengGuanYuan	41	0.025	0.984975	2.6	26.175	54.75	8.925
140716	XiChengGuanYuan	111	12.15	0.984275	1.9	25	73.5	2.975
140717	XiChengGuanYuan	110	4.325	0.9863	1.75	25.45	77	4.15
140718	XiChengGuanYuan	137	0.05	0.987825	1.675	28.575	72.75	6.375
140719	XiChengGuanYuan	67	0	0.9892	1.95	30.325	67.75	10.375
140720	XiChengGuanYuan	63	1.075	0.98625	2.525	30.075	67.5	10.6
140721	XiChengGuanYuan	32	0.625	0.983375	2.675	28.775	59.75	2.95
140722	XiChengGuanYuan	11	0.1	0.98755	1.4	25.825	61.75	0.2
140723	XiChengGuanYuan	24	0.025	0.9856	1.875	25.025	65.5	0.9
140724	XiChengGuanYuan	66	0.325	0.986425	1.375	25.475	67.5	2.25
140725	XiChengGuanYuan	66	0	0.98685	1.475	26.35	62.25	10.85
140726	XiChengGuanYuan	96	0	0.989175	2.1	27.875	54.5	11.6
140727	XiChengGuanYuan	97	0	0.989325	1.95	28.45	53	10.65
140728	XiChengGuanYuan	114	0	0.985275	2.05	28.675	58.5	10.75
140729	XiChengGuanYuan		0	0.984025	2.825	28.625	58.5	5.925
140730	XiChengGuanYuan	104	19.075	0.986025	1.925	25.175	77.5	3.075
140731	XiChengGuanYuan	188	0.025	0.98775	1.85	26.55	73.5	4.75
130801	XiChengWanShouXiGong	207	17.96	0.98786	1.5	23.16	86.2	2.28
130802	XiChengWanShouXiGong		0.28	0.98996	1.52	25.14	79.6	6.78
130803	XiChengWanShouXiGong	50	0.88	0.98866	1.8	25.96	71.4	11.3
130804	XiChengWanShouXiGong	18	5.34	0.98532	1.88	26.46	78.6	6.14
130805	XiChengWanShouXiGong	41	9.1	0.98312	1.28	24.66	80	11.68
130806	XiChengWanShouXiGong	114	0	0.98388	1.16	28.36	82.2	4.32
130807	XiChengWanShouXiGong	83	22.98	0.98664	1.94	24.9	84.4	0.46
130808	XiChengWanShouXiGong	32	0.72	0.98558	1.78	25.92	77.8	9.04
130809	XiChengWanShouXiGong	30	0.08	0.98598	1.46	27.38	71.8	11.36
130810	XiChengWanShouXiGong	69	0	0.98932	1.84	28.78	74.8	9.68
130811	XiChengWanShouXiGong	146	7.9	0.99088	1.76	27.34	84.8	1.04
130812	XiChengWanShouXiGong	87	5.68	0.9899	1.72	25.46	85	4.24
130813	XiChengWanShouXiGong	75	0	0.98954	1.46	27.44	80.4	7.4
130814	XiChengWanShouXiGong	79	4.2	0.98888	2.18	27.34	77.4	8.74
130815	XiChengWanShouXiGong	74	0	0.98756	1.48	29	80.8	1.6
130816	XiChengWanShouXiGong	112	2.7	0.98246	1.9	29.26	81	3.54
130817	XiChengWanShouXiGong	110	0	0.98572	2.46	29.32	55.8	11.4
130818	XiChengWanShouXiGong	7	0	0.9925	1.94	27.14	50.8	10.92
130819	XiChengWanShouXiGong	18	0	0.99478	1.34	26.04	60.4	11.22
130820	XiChengWanShouXiGong	73	2.24	0.99386	1.76	25.84	69	5.14
130821	XiChengWanShouXiGong	72	0.26	0.99254	1.12	25.6	72.6	5.56
130822	XiChengWanShouXiGong	96	0.06	0.9933	1.2	24.32	79	0.86
130823	XiChengWanShouXiGong	79	0.02	0.99374	1.4	25.64	65.8	8.46
130824	XiChengWanShouXiGong	26	0	0.9939	1.52	25.66	62.4	9.3
130825	XiChengWanShouXiGong	30	0	0.99168	1.64	26.4	60.8	11.64
130826	XiChengWanShouXiGong	36	0	0.99028	1.88	26.32	62.2	11.04
130827	XiChengWanShouXiGong		1.3	0.99162	2	24.78	76	1.84
130828	XiChengWanShouXiGong	60	13.32	0.98474	1.56	23.98	85.6	0
130829	XiChengWanShouXiGong	67	0	0.9871	3.58	23.12	59	9.76
130830	XiChengWanShouXiGong	6	0.38	0.99626	2.46	20.86	54.4	10.36
130831	XiChengWanShouXiGong	17	0	0.99662	1.4	21.44	53.4	11.34
130901	XiChengWanShouXiGong	36	0	0.99485	1.725	21.375	61	9.925
130902	XiChengWanShouXiGong	43	0.75	0.996725	1.775	21.25	68.75	9.55
130903	XiChengWanShouXiGong	94	0	0.9974	1.575	21.5	72	6.85
130904	XiChengWanShouXiGong	83	8.35	0.997175	1.5	19.375	85.75	0
130905	XiChengWanShouXiGong	28	17.725	0.995775	2.05	19.5	76.75	8.85
130906	XiChengWanShouXiGong	46	0.1	0.997225	1.675	19.375	77.75	5.7
130907	XiChengWanShouXiGong		0	0.997925	1.5	20.375	75.75	7.7
130908	XiChengWanShouXiGong	81	0.6	0.9977	1.5	20.975	81	1.9
130909	XiChengWanShouXiGong	120	3.175	0.99465	1.775	19.975	80	3.55
130910	XiChengWanShouXiGong	71	0.425	0.99395	1.575	20.375	69.75	9.5
130911	XiChengWanShouXiGong	28	0	0.996	1.425	20.15	70.5	10.75
130912	XiChengWanShouXiGong	82	1.175	0.9933	1.725	21.275	78.25	4
130913	XiChengWanShouXiGong	100	2.525	0.987875	1.875	20.1	85.5	3.4
130914	XiChengWanShouXiGong	84	9.4	0.989875	1.525	21.5	69	8.425
130915	XiChengWanShouXiGong	8	0	0.99485	1.6	19.325	58.5	9.025
130916	XiChengWanShouXiGong	32	0	0.99285	1.2	19.725	75.25	5.075
130917	XiChengWanShouXiGong	62	4.875	0.99565	1.475	20.525	84.75	1.625
130918	XiChengWanShouXiGong	91	5	0.999425	2.125	21.725	81.25	4
130919	XiChengWanShouXiGong	96	1.65	0.994825	1.525	21.075	80.25	3.65
130920	XiChengWanShouXiGong	112	0	0.99675	1.2	21.15	69	7.6
130921	XiChengWanShouXiGong	33	0	0.99685	1.35	21.35	69.5	6.225
130922	XiChengWanShouXiGong	46	0.05	0.996275	1.275	20.125	77	0.4
130923	XiChengWanShouXiGong	35	17.075	0.999375	3.1	14.775	74.75	0.775
130924	XiChengWanShouXiGong	10	0.025	1.00323	2	12.625	64	8.975
130925	XiChengWanShouXiGong		0	1.00242	2.3	13.8	53	10.75
130926	XiChengWanShouXiGong	21	0	0.9983	1.65	15.575	56.25	10.525
130927	XiChengWanShouXiGong	8	0	0.9931	1.975	16.45	61	8.9
130928	XiChengWanShouXiGong		0	0.9921	1.7	16.025	74.5	3.875
130929	XiChengWanShouXiGong		0	0.998075	1.35	16.625	83.25	0.55
130930	XiChengWanShouXiGong		0	0.9998	1.125	17.975	83.25	0.875
131001	XiChengWanShouXiGong		7.76	1.00118	2.02	17.14	80.6	3.78
131002	XiChengWanShouXiGong	25	0	1.00554	2.12	14.74	60.4	10.22
131003	XiChengWanShouXiGong	61	0	1.00202	1.88	15.44	66.8	9.28
131004	XiChengWanShouXiGong	115	0	0.99818	1.58	16.18	75.2	4.26
131005	XiChengWanShouXiGong	295	0	1.00322	1.34	17.34	74	5.22
131006	XiChengWanShouXiGong	259	0	1.00624	1.54	16.82	80.6	3.4
131007	XiChengWanShouXiGong	107	0	1.00644	1.98	17.24	66.4	7.7
131008	XiChengWanShouXiGong	47	2.04	1.00414	1.78	16.3	64.6	7.86
131009	XiChengWanShouXiGong	98	0	0.99518	1.4	15.76	76.6	3.4
131010	XiChengWanShouXiGong	113	0	0.99504	2.86	16	58.4	7
131011	XiChengWanShouXiGong	35	0	0.9995	1.7	14.14	56	9.74
131012	XiChengWanShouXiGong	69	0.02	1.00188	1.88	15.62	61.6	6.18
131013	XiChengWanShouXiGong	56	3.5	1.00234	2.32	14.2	73	0.46
131014	XiChengWanShouXiGong	66	2.94	1.01002	2.54	11.54	63.4	0.84
131015	XiChengWanShouXiGong	14	0	1.0147	1.48	7.74	53.6	9.88
131016	XiChengWanShouXiGong	35	0	1.00966	1.7	9.68	58.8	9.34
131017	XiChengWanShouXiGong	94	0	1.01004	1.38	10.4	64.6	8.76
131018	XiChengWanShouXiGong		0.02	1.00884	1.42	10.62	72.8	3.52
131019	XiChengWanShouXiGong		0.62	1.00944	2.78	12.38	50.6	5.08
131020	XiChengWanShouXiGong		0	1.0092	1.44	10.36	54.2	9.14
131021	XiChengWanShouXiGong		0	1.007	1.26	10.34	62.8	7.74
131022	XiChengWanShouXiGong		2.44	1.00582	1.9	10.68	71	4.04
131023	XiChengWanShouXiGong		0.04	1.006	2.62	8.64	48	9
131024	XiChengWanShouXiGong		0	1.01088	3.06	8.64	41.8	8.7
131025	XiChengWanShouXiGong		0	1.01134	1.6	8.16	62	8.78
131026	XiChengWanShouXiGong		0	1.0069	1.44	8.14	62.8	8.62
131027	XiChengWanShouXiGong		0	1.00182	1.1	8.32	69.6	5.76
131028	XiChengWanShouXiGong		0.04	1.00332	1.54	10.32	72.6	2.28
131029	XiChengWanShouXiGong		0	1.01148	2.48	9.48	58.2	8.92
131030	XiChengWanShouXiGong		0	1.01178	1.36	7.24	69	8.18
131031	XiChengWanShouXiGong		0	1.01132	0.9	7.06	73.6	1.82
131101	XiChengWanShouXiGong	220	0.14	1.00996	0.9	7.6	80.2	0.16
131102	XiChengWanShouXiGong	241	0	1.00622	1.44	8.78	85.2	1.96
131103	XiChengWanShouXiGong	71	0.16	1.00838	3	10.48	59.8	8.76
131104	XiChengWanShouXiGong	20	0	1.01204	1.4	8.26	56.8	9
131105	XiChengWanShouXiGong	172	0.02	1.00466	1.48	9.88	60.4	1.86
131106	XiChengWanShouXiGong	140	0	1.00138	3.3	8.94	55	7.38
131107	XiChengWanShouXiGong		0	1.0049	2.16	6.7	43.4	8.9
131108	XiChengWanShouXiGong	76	0	1.00404	1.46	6.9	56.2	6.36
131109	XiChengWanShouXiGong	109	0.64	1.00718	2.14	8.52	57	0.76
131110	XiChengWanShouXiGong	16	0	1.0134	3.94	3.28	21.2	8.7
131111	XiChengWanShouXiGong	33	0	1.0121	2.08	4.96	37.4	8.64
131112	XiChengWanShouXiGong	63	0	1.00882	1.74	5.86	49.2	8.72
131113	XiChengWanShouXiGong	167	0	1.00484	1.4	5.1	65	0.82
131114	XiChengWanShouXiGong	79	0	1.00268	2.58	6.44	47.4	7.36
131115	XiChengWanShouXiGong	106	0	1.00132	1.54	5.92	47.8	8
131116	XiChengWanShouXiGong	56	0	1.00272	4.02	7.14	36.4	7.84
131117	XiChengWanShouXiGong	7	0	1.00824	3.34	3.38	36.4	8.64
131118	XiChengWanShouXiGong	9	0	1.01024	3.1	2.06	34.8	8.44
131119	XiChengWanShouXiGong	32	0	1.00856	2.6	1.34	35.6	8.2
131120	XiChengWanShouXiGong	70	0	1.00726	1.28	1.56	51.4	7.86
131121	XiChengWanShouXiGong		0	1.00968	1.3	1.9	57.2	7.66
131122	XiChengWanShouXiGong	140	0	1.00852	1.44	3.08	56.2	6.98
131123	XiChengWanShouXiGong	248	0	1.00418	1.48	3.86	63.2	4.52
131124	XiChengWanShouXiGong	128	0.04	0.99974	2.58	5.02	56	0.36
131125	XiChengWanShouXiGong		0	1.00102	3.2	2.74	34.4	8.34
131126	XiChengWanShouXiGong	25	0	1.00238	3.56	0.18	35.6	7.74
131127	XiChengWanShouXiGong	6	0	1.01054	6.24	-3.5	20	7.94
131128	XiChengWanShouXiGong	15	0	1.01052	3.14	-2.74	25.8	8.08
131129	XiChengWanShouXiGong	86	0	1.00456	1.82	1.16	40	8.24
131130	XiChengWanShouXiGong	77	0	1.00644	2.52	2.44	38.4	8.14
131201	XiChengWanShouXiGong	115	0	1.00438	1.675	0.2	55.75	7.625
131202	XiChengWanShouXiGong	116	0	0.999975	1.375	0.9	54.5	6.375
131203	XiChengWanShouXiGong	88	0	1.00277	1.55	2.525	48.5	7.9
131204	XiChengWanShouXiGong	132	0	1.00083	1.375	2.55	51.5	6.05
131205	XiChengWanShouXiGong	58	0	1.0042	2.75	3.275	40.5	8.025
131206	XiChengWanShouXiGong	150	0	1.0005	2.15	1.35	58.75	6.4
131207	XiChengWanShouXiGong	275	0	1.0002	1.3	0.175	72.75	2.5
131208	XiChengWanShouXiGong	257	0	1.0013	2.55	1.9	70.75	0.45
131209	XiChengWanShouXiGong	45	0	1.00445	3.4	-0.175	40.25	7.85
131210	XiChengWanShouXiGong	31	0	1.00015	3.45	-1.225	43	5.65
131211	XiChengWanShouXiGong	22	0	1.00033	2.65	-1.575	38	6.75
131212	XiChengWanShouXiGong	24	0	1.00125	4.4	-3.15	31.5	7.95
131213	XiChengWanShouXiGong	62	0	1.0059	1.7	-5.65	38.5	7.2
131214	XiChengWanShouXiGong	55	0	1.00878	2.05	-4.35	39.75	7.25
131215	XiChengWanShouXiGong	52	0	1.0132	1.275	-3.05	39.25	6.55
131216	XiChengWanShouXiGong	122	0	1.01087	1.025	-3.275	50.5	2.125
131217	XiChengWanShouXiGong	105	0.95	1.01278	2.65	-3	61.75	2.125
131218	XiChengWanShouXiGong	35	0	1.01272	2.4	-7.675	55	7.475
131219	XiChengWanShouXiGong	47	0	1.01093	2.7	-6.95	51.25	7.7
131220	XiChengWanShouXiGong	43	0	1.01442	2.7	-5.775	49	7.55
131221	XiChengWanShouXiGong	51	0	1.0153	1.65	-5.325	48.75	6.75
131222	XiChengWanShouXiGong	152	0	1.01225	1.1	-5.275	55	4.275
131223	XiChengWanShouXiGong	157	0	1.0121	1.525	-4.75	57	6.275
131224	XiChengWanShouXiGong	265	0	1.0139	1.2	-5.05	68	1.675
131225	XiChengWanShouXiGong	208	0	1.00855	2.35	-4.375	63.75	2.625
131226	XiChengWanShouXiGong	9	0	1.01435	4.6	-4.775	32	7.725
131227	XiChengWanShouXiGong	16	0	1.01073	2.05	-6.025	41.5	6.2
131228	XiChengWanShouXiGong	18	0	1.00685	3.3	-5.175	36.5	7.725
131229	XiChengWanShouXiGong	68	0	1.0002	2.85	-2.975	34.5	7.6
131230	XiChengWanShouXiGong	49	0	0.9968	2.45	-2.375	37.75	7.675
131231	XiChengWanShouXiGong	74	0	0.99335	3.225	0.2	36.75	7.175
140101	XiChengWanShouXiGong	59	0	0.99848	1.94	1.12	38	7.54
140102	XiChengWanShouXiGong	115	0	1.00168	1.36	-0.36	53.8	6.38
140103	XiChengWanShouXiGong	112	0	1.00562	2.6	1.44	42.2	7.84
140104	XiChengWanShouXiGong	56	0	1.00576	1.46	-2.3	65.4	5.12
140105	XiChengWanShouXiGong	92	0	1.00752	2.4	-1.6	57	7.68
140106	XiChengWanShouXiGong	125	0.02	1.009	1.2	-2.32	78	0.24
140107	XiChengWanShouXiGong	119	0	1.00992	2.6	-0.62	54	2.86
140108	XiChengWanShouXiGong	20	0	1.01642	3.16	-3.92	29.4	6.68
140109	XiChengWanShouXiGong	29	0	1.01496	1.64	-7.28	34.2	7.38
140110	XiChengWanShouXiGong	93	0	1.01394	1.36	-6.08	43	7.04
140111	XiChengWanShouXiGong	206	0	1.0139	1.72	-4.9	50.8	4.4
140112	XiChengWanShouXiGong	68	0	1.01896	2.74	-3.22	27.4	8.18
140113	XiChengWanShouXiGong	124	0	1.0152	1.64	-5.1	46.2	7.02
140114	XiChengWanShouXiGong	161	0	1.01688	1.48	-5.56	51.2	7.32
140115	XiChengWanShouXiGong	124	0	1.01446	1.24	-4.68	56.8	5.56
140116	XiChengWanShouXiGong	437	0	1.01096	2.06	-2.02	63	2.26
140117	XiChengWanShouXiGong	208	0	1.01456	2.22	-1.78	64.6	4.1
140118	XiChengWanShouXiGong		0	1.0161	1.84	-2.68	54.8	6.62
140119	XiChengWanShouXiGong	149	0	1.00824	2.66	-1.54	54.6	2.3
140120	XiChengWanShouXiGong	9	0	1.01286	4.32	-1.92	27.6	8.38
140121	XiChengWanShouXiGong	10	0	1.01562	2.32	-4.2	33.4	8.28
140122	XiChengWanShouXiGong	119	0	1.00704	1.16	-3.24	37.6	7.32
140123	XiChengWanShouXiGong	179	0	1.00026	1.42	-3.5	48.6	1.66
140124	XiChengWanShouXiGong	186	0	1.00086	1.92	1.44	37.4	0
140125	XiChengWanShouXiGong		0	1.01028	2.3	0.34	34.4	6.76
140126	XiChengWanShouXiGong	22	0	1.01252	1.48	-3.16	58.8	7.5
140127	XiChengWanShouXiGong	101	0	1.00268	2.54	-0.62	51.4	5.9
140128	XiChengWanShouXiGong	31	0	1.01124	2.34	-1.36	40.6	7.08
140129	XiChengWanShouXiGong	101	0	0.99834	1.62	-2.38	62.2	3.4
140130	XiChengWanShouXiGong	78	0	1.00128	2.84	0.34	44.4	8
140131	XiChengWanShouXiGong	156	0	1.00232	2	-1.5	70.6	0.38
140201	XiChengWanShouXiGong	141	0.06	0.99964	1.52	0.82	81.8	0.68
140202	XiChengWanShouXiGong	89	0	0.99854	3.78	2.7	50.8	7.16
140203	XiChengWanShouXiGong	6	0	1.01012	4.32	-2.48	18.6	8.44
140204	XiChengWanShouXiGong	20	0	1.01284	2.1	-5.88	20.6	7.02
140205	XiChengWanShouXiGong	95	0	1.01152	1.46	-4.18	37.4	3.26
140206	XiChengWanShouXiGong	118	0.02	1.01246	1.78	-3.54	54.2	1.82
140207	XiChengWanShouXiGong	94	2.66	1.01004	1.8	-3.26	77.4	0
140208	XiChengWanShouXiGong	60	0.52	1.01082	3.14	-3.94	60	7.14
140209	XiChengWanShouXiGong	7	0	1.01942	3.78	-7.48	36	8.82
140210	XiChengWanShouXiGong	16	0	1.01812	1.42	-7.64	43	8.64
140211	XiChengWanShouXiGong	97	0	1.01154	1.82	-6.28	52	7.86
140212	XiChengWanShouXiGong	142	0	1.0152	1.48	-4.46	52.4	7.76
140213	XiChengWanShouXiGong	176	0.04	1.01746	1.6	-3.62	67.4	1.36
140214	XiChengWanShouXiGong	242	0.02	1.00954	1.3	-3.08	70	2.02
140215	XiChengWanShouXiGong	449	0	1.00752	1.22	-2.08	69.6	0.68
140216	XiChengWanShouXiGong	375	0	1.01192	1.72	-0.36	61.8	3.8
140217	XiChengWanShouXiGong		0	1.01766	2.02	0.3	42	3.14
140218	XiChengWanShouXiGong	65	0.06	1.01514	1.88	-2.16	55.8	2.88
140219	XiChengWanShouXiGong	57	0.14	1.0121	1.62	-2.14	58.8	8.3
140220	XiChengWanShouXiGong	205	0.04	1.01326	1.44	-2.16	74.8	2.16
140221	XiChengWanShouXiGong	260	0	1.01128	1.18	-1.02	73.8	0.66
140222	XiChengWanShouXiGong	266	0	1.01278	1.52	1.1	70.8	0.24
140223	XiChengWanShouXiGong	194	0	1.01376	1.66	0.86	74.6	0
140224	XiChengWanShouXiGong	268	0	1.01092	1	2.52	69.2	0.26
140225	XiChengWanShouXiGong	402	0	1.00932	1.06	3.36	70.8	0.12
140226	XiChengWanShouXiGong	441	0.74	1.00632	2.28	4.54	76	0.82
140227	XiChengWanShouXiGong	24	0.46	1.0122	4.2	2.94	33.6	10.1
140228	XiChengWanShouXiGong	74	0.02	1.00988	1.74	0.18	58	1.7
140301	XiChengWanShouXiGong	72	0	1.00722	1.98	2.28	45.2	9
140302	XiChengWanShouXiGong	135	0	1.00564	1.96	2.1	49.4	7.56
140303	XiChengWanShouXiGong	221	0	1.0049	1.62	1.28	65.4	0
140304	XiChengWanShouXiGong	93	0.02	1.00942	3.3	3.88	31.8	10.26
140305	XiChengWanShouXiGong	16	0	1.01188	2.58	1.56	29.8	9.24
140306	XiChengWanShouXiGong	15	0	1.01334	2.62	1.02	21.8	10.18
140307	XiChengWanShouXiGong	52	0	1.01282	1.86	1.08	35.4	8.52
140308	XiChengWanShouXiGong	136	0	1.00684	1.9	3.08	46.6	6.14
140309	XiChengWanShouXiGong	110	0	1.00926	2.22	2.72	45.2	8.88
140310	XiChengWanShouXiGong	75	0	1.007	1.72	2.66	61	6.74
140311	XiChengWanShouXiGong	195	0	1.0012	2.16	5.94	55.2	3.52
140312	XiChengWanShouXiGong	13	0.08	1.0089	3.72	5.9	24.8	8.28
140313	XiChengWanShouXiGong	19	0	1.00594	2.34	5.08	23.2	9.74
140314	XiChengWanShouXiGong	17	0	1.00232	3.22	9.06	17.4	10.64
140315	XiChengWanShouXiGong	43	0	0.99484	2.22	11.48	27	9.06
140316	XiChengWanShouXiGong	115	0	0.9983	2.92	10.22	38.8	7.86
140317	XiChengWanShouXiGong	99	0	0.9962	3.14	11.64	41.6	6.06
140318	XiChengWanShouXiGong	30	0	1.00584	2.66	10.2	33	6.26
140319	XiChengWanShouXiGong	50	0.14	1.00628	1.94	6.78	51	2.24
140320	XiChengWanShouXiGong	10	0	1.01064	3.34	10.14	21.8	10.9
140321	XiChengWanShouXiGong	24	0	1.00482	2	11.82	25.2	10.44
140322	XiChengWanShouXiGong	49	0	1.00166	2.76	13.5	26.2	10.4
140323	XiChengWanShouXiGong	117	0	1.00702	1.8	11.88	38.6	7.64
140324	XiChengWanShouXiGong	221	0	0.99814	2.22	13.04	48	7.38
140325	XiChengWanShouXiGong	225	0	0.9946	1.58	14.42	50	5.96
140326	XiChengWanShouXiGong	200	0	0.99442	2.02	16.02	56.4	7.26
140327	XiChengWanShouXiGong	254	0	0.99496	1.92	14.48	65.8	1
140328	XiChengWanShouXiGong	113	3.72	0.99202	1.86	14.86	64.2	3.98
140329	XiChengWanShouXiGong	59	0	0.99706	1.82	14.4	54.6	9.76
140330	XiChengWanShouXiGong	38	0	0.99956	1.76	16.52	40.2	10.06
140331	XiChengWanShouXiGong	131	0.38	0.9994	2.1	16.54	47.4	0.42
140401	XiChengWanShouXiGong	134	0.04	0.99662	1.56	15.3	54.6	9.24
140402	XiChengWanShouXiGong	107	0.02	0.9986	2.36	15.82	42.8	5.68
140403	XiChengWanShouXiGong	36	0	1.00756	4.14	12.78	25.6	10.94
140404	XiChengWanShouXiGong	34	0	0.99938	4.06	13.82	25.2	10.54
140405	XiChengWanShouXiGong	22	0	1.00648	2.94	11.9	25	11.2
140406	XiChengWanShouXiGong	54	0	1.00228	2.78	15.12	26.8	10.82
140407	XiChengWanShouXiGong	85	0	0.99738	1.9	16.02	35.6	9.82
140408	XiChengWanShouXiGong	58	0	0.9974	1.98	17.2	44.8	8.42
140409	XiChengWanShouXiGong	113	0	0.99528	3.74	20.56	40.6	9.14
140410	XiChengWanShouXiGong	80	0.02	1.00534	2.16	15.08	33.6	0
140411	XiChengWanShouXiGong	58	0.08	1.00276	1.8	13.44	42	1.3
140412	XiChengWanShouXiGong	91	0	0.99996	1.4	13.88	44.4	8.44
140413	XiChengWanShouXiGong	143	0	1.001	1.7	15.76	52.2	8.92
140414	XiChengWanShouXiGong	221	0	1.00034	2.22	18.7	57	8.48
140415	XiChengWanShouXiGong	29	0	1.0027	2.72	16.86	51	2.24
140416	XiChengWanShouXiGong	44	0	0.99804	1.56	16.12	33.4	1.64
140417	XiChengWanShouXiGong	102	5.18	0.99614	1.66	13.38	69	1.58
140418	XiChengWanShouXiGong	146	0	1.00288	1.74	14.42	68.6	3.52
140419	XiChengWanShouXiGong	51	1.4	1.00452	1.34	12.26	58.6	1.3
140420	XiChengWanShouXiGong	53	0.02	1.0009	1.62	13.58	53.4	9
140421	XiChengWanShouXiGong	31	0	1.00018	1.44	16.52	43.4	10
140422	XiChengWanShouXiGong	59	0	0.99788	2.6	18.42	39.8	10.86
140423	XiChengWanShouXiGong		0.46	0.99472	2.96	19.7	54	7.78
140424	XiChengWanShouXiGong		0.52	0.99808	2.32	19.5	57.4	6.68
140425	XiChengWanShouXiGong		0.6	1.00054	2.62	19.34	52.2	6.06
140426	XiChengWanShouXiGong		12.24	1.0042	2.76	13.98	67	7.26
140427	XiChengWanShouXiGong		0	1.00442	1.88	15.88	56	10.26
140428	XiChengWanShouXiGong		0	1.00326	1.76	17.46	47.8	11.14
140429	XiChengWanShouXiGong	90	0	0.9976	1.74	18.86	43.2	10.94
140430	XiChengWanShouXiGong	117	0	0.99342	2.02	20.5	46.6	10.52
140501	XiChengWanShouXiGong	124	0.08	0.99212	3.1	20.22	54.6	6.08
140502	XiChengWanShouXiGong	22	3.86	0.9999	4.28	15.28	33.8	9.2
140503	XiChengWanShouXiGong	45	0.02	0.99728	4.72	15.72	35.8	8.92
140504	XiChengWanShouXiGong	29	0	1.00168	5.1	12.52	21.2	11.24
140505	XiChengWanShouXiGong	31	0	1.00156	2.16	13.1	27.6	11.84
140506	XiChengWanShouXiGong		0	0.99244	2.4	15.72	40.2	7.78
140507	XiChengWanShouXiGong		0.12	0.99034	3.16	17.8	43	11.38
140508	XiChengWanShouXiGong	75	0	0.99784	2.58	16.84	49	9.18
140509	XiChengWanShouXiGong	65	0	0.99792	3.24	17.64	45.8	2.08
140510	XiChengWanShouXiGong	52	0.68	0.99936	2.42	16.42	53.2	1.12
140511	XiChengWanShouXiGong	27	24.12	0.99086	2.66	11.2	88.4	0.14
140512	XiChengWanShouXiGong	29	0.08	0.9857	3.04	20.14	52	11.7
140513	XiChengWanShouXiGong	53	0	0.98528	2.38	21.56	45.6	9.78
140514	XiChengWanShouXiGong	15	0	0.9899	4.08	18.2	25.4	8.26
140515	XiChengWanShouXiGong	49	0	0.9848	2.32	20.48	33.2	10.84
140516	XiChengWanShouXiGong	46	0.02	0.99082	2.52	22.28	33.2	11.8
140517	XiChengWanShouXiGong	57	0.26	0.99686	2.18	20.78	41.6	8.42
140518	XiChengWanShouXiGong	67	0.02	0.9931	1.88	22.56	46.8	10.46
140519	XiChengWanShouXiGong	103	2.22	0.98898	1.7	22.86	56.4	8.08
140520	XiChengWanShouXiGong	90	0	0.98862	2.48	24.26	47.8	11.68
140521	XiChengWanShouXiGong	105	0.02	0.9897	2.1	24.32	53.6	9.2
140522	XiChengWanShouXiGong		0	0.99062	2.44	27.2	44.6	11.3
140523	XiChengWanShouXiGong	77	0	0.99434	2.74	27.72	37.8	9.2
140524	XiChengWanShouXiGong	84	5.72	0.99222	1.66	20.76	82.2	0.64
140525	XiChengWanShouXiGong	79	0.02	0.99122	2.98	22.18	52.8	7.88
140526	XiChengWanShouXiGong	20	0	0.98522	3.64	25.22	27.6	12.04
140527	XiChengWanShouXiGong	36	0.04	0.98102	4.32	25.06	32.2	10.76
140528	XiChengWanShouXiGong	28	0	0.98574	2.5	27.44	28.4	12.36
140529	XiChengWanShouXiGong	41	0	0.98304	1.9	29.82	28.2	12.58
140530	XiChengWanShouXiGong	91	0	0.98958	2.7	28.76	37.8	10.52
140531	XiChengWanShouXiGong	107	0.02	0.99152	2.34	27.44	48.8	5.98
140601	XiChengWanShouXiGong	50	5.63333	0.986333	2.63333	22.6333	68.3333	2.23333
140602	XiChengWanShouXiGong	31	0	0.989133	2.5	20.6667	58.3333	5.66667
140603	XiChengWanShouXiGong	38	0	0.986067	2.63333	23.5667	51	11.9333
140604	XiChengWanShouXiGong	54	0.0666667	0.9845	1.2	23.5333	58	6.7
140605	XiChengWanShouXiGong	72	0	0.9831	2.23333	25.6667	58.3333	11.2667
140606	XiChengWanShouXiGong	69	29.2667	0.982433	2.86667	21.8333	71.3333	3.6
140607	XiChengWanShouXiGong	9	0.566667	0.9824	2.56667	21.1667	58.3333	13
140608	XiChengWanShouXiGong	31	2.6	0.980167	1.43333	21.1667	60.6667	7
140609	XiChengWanShouXiGong	33	0	0.9826	2.2	22.1	58.3333	11.2667
140610	XiChengWanShouXiGong	67	1.9	0.9863	1.8	21.6667	68.3333	5.6
140611	XiChengWanShouXiGong	53	0.0333333	0.9879	1.7	22.1	63.6667	10.4667
140612	XiChengWanShouXiGong	28	0.0333333	0.984733	2.23333	25.7667	49.3333	12.1
140613	XiChengWanShouXiGong	65	0.8	0.985433	1.96667	25.4	59	10.0333
140614	XiChengWanShouXiGong	32	0.8	0.984733	1.6	25.4333	60.3333	12.2
140615	XiChengWanShouXiGong	112	1.66667	0.9827	2.7	26.0667	58.6667	4.43333
140616	XiChengWanShouXiGong	126	0.5	0.9809	2.56667	24.9	66	5.53333
140617	XiChengWanShouXiGong	94	9.46667	0.980133	1.7	23.7	71.3333	2.46667
140618	XiChengWanShouXiGong	62	0	0.9813	2	23.1333	71	4.26667
140619	XiChengWanShouXiGong	132	0	0.982467	1.83333	22.8	71.6667	2.06667
140620	XiChengWanShouXiGong	40	7.53333	0.9847	2.6	21.4	74.6667	6.26667
140621	XiChengWanShouXiGong	67	6.5	0.9861	2	21.8667	73.6667	7.9
140622	XiChengWanShouXiGong	31	2.63333	0.986967	1.66667	21.4667	74.6667	6.76667
140623	XiChengWanShouXiGong	25	0.0333333	0.986067	1.36667	23.4333	64	12.4667
140624	XiChengWanShouXiGong	49	0	0.982767	2.06667	25.6333	57.6667	10.9333
140625	XiChengWanShouXiGong	88	5.03333	0.981833	1.63333	22.9333	79	0
140626	XiChengWanShouXiGong	137	0.0333333	0.9815	1.93333	25.4	71.3333	9.8
140627	XiChengWanShouXiGong	27	1.43333	0.9851	2.23333	26.3	51.3333	12
140628	XiChengWanShouXiGong	20	0	0.9842	1.83333	27.0667	44	13.1333
140629	XiChengWanShouXiGong	51	0	0.984033	1.43333	27.4333	53	8.06667
140630	XiChengWanShouXiGong	74	0	0.9843	1.7	27.7	50.3333	9.03333
140701	XiChengWanShouXiGong	100	11.25	0.98555	1.925	26.5	62	1.9
140702	XiChengWanShouXiGong	54	22.5	0.983875	1.6	23.15	83.5	1.55
140703	XiChengWanShouXiGong	176	0.025	0.9821	1.3	25.275	77.5	2.275
140704	XiChengWanShouXiGong	196	7.25	0.9853	1.8	26.7	73.5	6.175
140705	XiChengWanShouXiGong	102	0	0.98765	1.45	26.55	73.5	4.7
140706	XiChengWanShouXiGong	181	0	0.985925	1.525	27.125	72.25	4.3
140707	XiChengWanShouXiGong	156	5.425	0.983875	2.175	27.35	71.25	0
140708	XiChengWanShouXiGong	125	0	0.983275	2.425	27.725	58.5	5.575
140709	XiChengWanShouXiGong	25	0	0.9855	1.6	26.3	51.5	2.275
140710	XiChengWanShouXiGong	27	0	0.98175	2.25	27.75	48	12.1
140711	XiChengWanShouXiGong	36	0	0.981225	2.35	27.825	48	11.425
140712	XiChengWanShouXiGong	12	0	0.9835	2.375	27.5	42.5	11.25
140713	XiChengWanShouXiGong	17	5.825	0.983675	2.6	26.575	50.5	11.55
140714	XiChengWanShouXiGong	27	0	0.983575	1.975	27.45	50.5	10.225
140715	XiChengWanShouXiGong	39	0.025	0.984975	2.6	26.175	54.75	8.925
140716	XiChengWanShouXiGong	104	12.15	0.984275	1.9	25	73.5	2.975
140717	XiChengWanShouXiGong	120	4.325	0.9863	1.75	25.45	77	4.15
140718	XiChengWanShouXiGong	125	0.05	0.987825	1.675	28.575	72.75	6.375
140719	XiChengWanShouXiGong	65	0	0.9892	1.95	30.325	67.75	10.375
140720	XiChengWanShouXiGong	60	1.075	0.98625	2.525	30.075	67.5	10.6
140721	XiChengWanShouXiGong	28	0.625	0.983375	2.675	28.775	59.75	2.95
140722	XiChengWanShouXiGong	11	0.1	0.98755	1.4	25.825	61.75	0.2
140723	XiChengWanShouXiGong	26	0.025	0.9856	1.875	25.025	65.5	0.9
140724	XiChengWanShouXiGong	72	0.325	0.986425	1.375	25.475	67.5	2.25
140725	XiChengWanShouXiGong	67	0	0.98685	1.475	26.35	62.25	10.85
140726	XiChengWanShouXiGong	102	0	0.989175	2.1	27.875	54.5	11.6
140727	XiChengWanShouXiGong	98	0	0.989325	1.95	28.45	53	10.65
140728	XiChengWanShouXiGong	110	0	0.985275	2.05	28.675	58.5	10.75
140729	XiChengWanShouXiGong		0	0.984025	2.825	28.625	58.5	5.925
140730	XiChengWanShouXiGong	97	19.075	0.986025	1.925	25.175	77.5	3.075
140731	XiChengWanShouXiGong	183	0.025	0.98775	1.85	26.55	73.5	4.75
130801	ChaoYangAoTiZhongXin	203	20.54	0.9773	1.42	23.42	82.8	4.36
130802	ChaoYangAoTiZhongXin	29	0.28	0.9794	1.74	25.14	78	7.42
130803	ChaoYangAoTiZhongXin	52	0.66	0.97788	1.56	26.12	69.6	10.86
130804	ChaoYangAoTiZhongXin	20	5.34	0.97486	2.06	26.32	72.4	9.96
130805	ChaoYangAoTiZhongXin	43	12.64	0.97258	1.26	24.76	75.8	11.92
130806	ChaoYangAoTiZhongXin	117	0	0.9737	1.4	27.38	78.8	5.66
130807	ChaoYangAoTiZhongXin	78	27.92	0.9766	1.76	24.38	84.2	2
130808	ChaoYangAoTiZhongXin	27	1.16	0.9751	1.88	25.66	75.4	9.36
130809	ChaoYangAoTiZhongXin		0.2	0.97572	1.7	26.28	67.6	12.3
130810	ChaoYangAoTiZhongXin		0	0.97912	1.44	27.86	72.8	9.1
130811	ChaoYangAoTiZhongXin	143	7.44	0.98064	1.7	26.96	83.4	0.92
130812	ChaoYangAoTiZhongXin		5.86	0.97928	1.44	25.24	84	4.06
130813	ChaoYangAoTiZhongXin	72	0	0.979	1.48	27.14	78.8	8.78
130814	ChaoYangAoTiZhongXin	71	4.08	0.97858	1.74	27.68	77.6	7.56
130815	ChaoYangAoTiZhongXin	87	0.08	0.9773	1.3	28.32	78.8	2.02
130816	ChaoYangAoTiZhongXin	122	22.22	0.97246	1.48	27.14	86.2	1.3
130817	ChaoYangAoTiZhongXin	127	0	0.97542	2.04	28.52	59	11.26
130818	ChaoYangAoTiZhongXin	16	0	0.98204	2.06	27.02	49.4	11.76
130819	ChaoYangAoTiZhongXin	20	0	0.9845	1.36	25.4	57.6	11.22
130820	ChaoYangAoTiZhongXin	88	2.68	0.98364	1.38	24.6	71	2.18
130821	ChaoYangAoTiZhongXin	115	0.56	0.98198	1.42	25.08	74.4	7.92
130822	ChaoYangAoTiZhongXin	102	0.06	0.98294	0.96	23.46	80.4	1.24
130823	ChaoYangAoTiZhongXin	95	0.02	0.9834	1.5	25.36	63.4	9.84
130824	ChaoYangAoTiZhongXin	33	0	0.9835	1.54	25.6	56.8	10.74
130825	ChaoYangAoTiZhongXin	33	0.12	0.98118	1.42	25.66	60.2	11.6
130826	ChaoYangAoTiZhongXin	42	0	0.98006	1.86	25.72	60.4	11.16
130827	ChaoYangAoTiZhongXin	65	0	0.98146	1.5	23.7	74.4	1.5
130828	ChaoYangAoTiZhongXin	58	30.1	0.97468	1.46	22.04	89.6	0
130829	ChaoYangAoTiZhongXin	51	0	0.97658	2.84	22.06	64.2	7.54
130830	ChaoYangAoTiZhongXin	7	0.38	0.98546	2.08	20.46	53.6	10.96
130831	ChaoYangAoTiZhongXin	16	0.72	0.98602	1.44	20.06	59	11.14
130901	ChaoYangAoTiZhongXin	32	0.05	0.981875	1.55	19.675	65	9.5
130902	ChaoYangAoTiZhongXin	38	2.575	0.983875	1.475	19.65	68.25	10.925
130903	ChaoYangAoTiZhongXin	93	0	0.984475	1.55	20.15	68	10.025
130904	ChaoYangAoTiZhongXin	84	0.875	0.984025	1.3	19.05	79.75	0.525
130905	ChaoYangAoTiZhongXin	28	21.3	0.98275	1.6	17.575	84	5.55
130906	ChaoYangAoTiZhongXin	39	3.225	0.98405	1.4	18.075	78.5	7.1
130907	ChaoYangAoTiZhongXin	83	1.2	0.984925	1.4	19.325	73.75	10.175
130908	ChaoYangAoTiZhongXin	64	0.6	0.9847	1.3	19.5	78.25	5.325
130909	ChaoYangAoTiZhongXin	89	3.175	0.980925	1.325	19.725	81.25	4.475
130910	ChaoYangAoTiZhongXin	97	0.425	0.980625	1.7	19.95	69	9.025
130911	ChaoYangAoTiZhongXin	26	0	0.9828	1.575	19.025	68.25	10.55
130912	ChaoYangAoTiZhongXin	92	1.175	0.98025	1.85	20.325	76.5	5.775
130913	ChaoYangAoTiZhongXin	111	10.45	0.974875	1.55	18.95	87	3.025
130914	ChaoYangAoTiZhongXin	88	0.675	0.97675	1.7	20.7	63.75	9.725
130915	ChaoYangAoTiZhongXin	16	0	0.981925	1.325	17.6	52.5	10.15
130916	ChaoYangAoTiZhongXin	37	0	0.9797	1.4	18.375	69.75	8.325
130917	ChaoYangAoTiZhongXin	64	1.8	0.982925	1.075	18.925	83.5	1.35
130918	ChaoYangAoTiZhongXin	90	5.325	0.986975	1.3	19.875	86.5	1.925
130919	ChaoYangAoTiZhongXin	102	1.7	0.981475	1.675	20.4	80.25	3.675
130920	ChaoYangAoTiZhongXin	110	0	0.9837	1.025	19.925	67.75	8.25
130921	ChaoYangAoTiZhongXin	29	0	0.98365	1.375	20.875	66.25	9.625
130922	ChaoYangAoTiZhongXin	49	0.05	0.98305	1.325	19.125	77.75	0.4
130923	ChaoYangAoTiZhongXin	59	10.325	0.985875	2.275	14.85	68.75	0.775
130924	ChaoYangAoTiZhongXin	10	0	0.989525	1.575	12.1	59.25	9.4
130925	ChaoYangAoTiZhongXin		0	0.988325	1.925	12.775	54	10.9
130926	ChaoYangAoTiZhongXin	34	0	0.984925	1.475	14.275	58.25	10.675
130927	ChaoYangAoTiZhongXin	123	0	0.979625	1.425	15.225	67.5	9.35
130928	ChaoYangAoTiZhongXin	240	0	0.978825	1.125	14.85	77.75	3.25
130929	ChaoYangAoTiZhongXin	254	0	0.9852	0.975	16.025	77.75	0
130930	ChaoYangAoTiZhongXin	214	0	0.986525	0.8	16.875	82.25	0
131001	ChaoYangAoTiZhongXin	151	14	0.99056	2.08	16.32	81.4	4.16
131002	ChaoYangAoTiZhongXin	22	0	0.99432	1.74	14.04	60.4	10.62
131003	ChaoYangAoTiZhongXin	52	0	0.9915	1.68	14.04	66.6	9.6
131004	ChaoYangAoTiZhongXin	116	0	0.98744	1.1	15.32	78.2	5.16
131005	ChaoYangAoTiZhongXin	269	0	0.99266	0.92	16.74	77.8	3
131006	ChaoYangAoTiZhongXin	283	0	0.99558	1.46	16.14	81	3.84
131007	ChaoYangAoTiZhongXin	123	0	0.99584	1.88	16.9	62.6	8.06
131008	ChaoYangAoTiZhongXin	48	2.06	0.99316	1.44	15.58	64.6	7.78
131009	ChaoYangAoTiZhongXin	102	0	0.98458	0.92	14.36	79.6	3.7
131010	ChaoYangAoTiZhongXin	111	0.04	0.98404	2.54	15.24	61.4	6.84
131011	ChaoYangAoTiZhongXin	35	0	0.98854	1.44	13	56.8	10.02
131012	ChaoYangAoTiZhongXin	70	0.02	0.99176	1.4	14.3	56.8	6.94
131013	ChaoYangAoTiZhongXin	51	2.22	0.99216	1.44	13.42	74.6	0.46
131014	ChaoYangAoTiZhongXin	56	0.52	0.99916	2.6	11.08	56.6	1.04
131015	ChaoYangAoTiZhongXin	11	0	1.0032	1.38	7.16	51.8	9.96
131016	ChaoYangAoTiZhongXin	25	0	0.9983	1.24	9.06	54	9.84
131017	ChaoYangAoTiZhongXin	76	0	0.99894	1.12	9.76	63	8.84
131018	ChaoYangAoTiZhongXin		0.02	0.99784	0.88	10.1	71.4	4.66
131019	ChaoYangAoTiZhongXin		0.8	0.99834	2.22	11.68	56.2	6.56
131020	ChaoYangAoTiZhongXin		0	0.99788	1.12	10.08	55	9.3
131021	ChaoYangAoTiZhongXin		0	0.99602	0.92	9.7	62.2	8.06
131022	ChaoYangAoTiZhongXin		4.44	0.995	1.9	9.38	71.6	3.76
131023	ChaoYangAoTiZhongXin		2.26	0.99504	2.66	7.44	51.8	8.7
131024	ChaoYangAoTiZhongXin		0	0.99936	2.94	7.78	44.8	8.06
131025	ChaoYangAoTiZhongXin		0	0.99996	1.2	8.22	58.4	8.9
131026	ChaoYangAoTiZhongXin		0	0.9956	1.38	7.76	60.4	9.02
131027	ChaoYangAoTiZhongXin		0	0.99076	0.8	7.58	68.4	7.24
131028	ChaoYangAoTiZhongXin		0.02	0.99264	1.36	8.94	72.2	1.6
131029	ChaoYangAoTiZhongXin		0.02	1.00018	2.12	8.68	56.2	8.2
131030	ChaoYangAoTiZhongXin		0	1.0004	1.12	6.5	63.6	8.54
131031	ChaoYangAoTiZhongXin		0	1.00002	0.88	6.72	69	4.04
131101	ChaoYangAoTiZhongXin	193	0.04	0.99846	1.04	7.6	72.2	2.2
131102	ChaoYangAoTiZhongXin	217	0	0.9946	1.22	8.46	78	4.16
131103	ChaoYangAoTiZhongXin	71	0.18	0.99682	2.8	10.4	55.8	8.4
131104	ChaoYangAoTiZhongXin	15	0	1.00068	1.3	7.96	53.4	9.2
131105	ChaoYangAoTiZhongXin	152	0.02	0.9936	1.02	7.74	62.8	1.4
131106	ChaoYangAoTiZhongXin		0	0.9899	3.14	7.78	54	7.94
131107	ChaoYangAoTiZhongXin		0	0.99324	1.88	6.62	39.8	9.04
131108	ChaoYangAoTiZhongXin	73	0	0.99306	0.9	5.82	54.4	5.4
131109	ChaoYangAoTiZhongXin	115	0	0.9962	2.1	8.02	50.4	0.76
131110	ChaoYangAoTiZhongXin	14	0	1.00148	3.66	2.72	17.6	8.88
131111	ChaoYangAoTiZhongXin	28	0	1.00034	2.02	4.78	34.4	8.76
131112	ChaoYangAoTiZhongXin	62	0	0.99744	1.5	5.36	47.2	8.74
131113	ChaoYangAoTiZhongXin	159	0	0.9935	0.98	4.06	63	1.08
131114	ChaoYangAoTiZhongXin	80	0	0.99094	2.36	5.54	46.2	8.3
131115	ChaoYangAoTiZhongXin	91	0	0.98992	1.2	4.76	46.4	8.16
131116	ChaoYangAoTiZhongXin	57	0	0.99112	3.28	6.16	36.4	7.54
131117	ChaoYangAoTiZhongXin	10	0	0.99632	3.28	2.34	38.2	8.54
131118	ChaoYangAoTiZhongXin	10	0	0.9984	3.52	1.66	30.6	8.56
131119	ChaoYangAoTiZhongXin	29	0	0.99676	2.24	0.62	30.4	8.36
131120	ChaoYangAoTiZhongXin	72	0	0.99576	1.1	1.22	47.4	8.4
131121	ChaoYangAoTiZhongXin		0	0.9981	1.12	1.52	53.8	8.04
131122	ChaoYangAoTiZhongXin	123	0	0.9969	1.14	2.4	54.8	8.22
131123	ChaoYangAoTiZhongXin	202	0	0.9929	1.5	3.04	55.2	6.22
131124	ChaoYangAoTiZhongXin	132	0	0.98836	2.22	4.1	47.6	0.36
131125	ChaoYangAoTiZhongXin		0	0.9891	3.02	1.74	32.6	8.34
131126	ChaoYangAoTiZhongXin	19	0	0.99074	3.54	-1.28	33.4	7.86
131127	ChaoYangAoTiZhongXin	9	0	0.9977	5.6	-4.58	19.8	8.16
131128	ChaoYangAoTiZhongXin	13	0	0.99808	2.82	-2.9	23.8	8.24
131129	ChaoYangAoTiZhongXin	51	0	0.99264	1.7	1.04	38.4	8.32
131130	ChaoYangAoTiZhongXin	66	0	0.99512	2.1	1.58	36.4	8.3
131201	ChaoYangAoTiZhongXin	71	0	0.989675	1.425	-1.075	45.5	8.15
131202	ChaoYangAoTiZhongXin	106	0	0.985675	1.15	-0.25	47.25	7.35
131203	ChaoYangAoTiZhongXin	77	0	0.988525	1.25	1.575	45.5	8
131204	ChaoYangAoTiZhongXin	93	0	0.98685	1.175	1.025	51.75	6.325
131205	ChaoYangAoTiZhongXin	45	0	0.9901	2.1	2.025	38	8.15
131206	ChaoYangAoTiZhongXin	103	0	0.986075	1.225	-0.4	49	7.25
131207	ChaoYangAoTiZhongXin	222	0	0.98615	0.9	-0.875	62.75	3.725
131208	ChaoYangAoTiZhongXin	245	0	0.987025	2.175	1.55	55.75	0.45
131209	ChaoYangAoTiZhongXin	44	0	0.989725	3.1	-1.15	37.5	7.975
131210	ChaoYangAoTiZhongXin	22	0	0.9852	2.85	-2.775	41.75	6.275
131211	ChaoYangAoTiZhongXin	19	0	0.9854	2.225	-2.825	35.5	6.525
131212	ChaoYangAoTiZhongXin	18	0	0.986975	3.65	-4.925	27.5	7.95
131213	ChaoYangAoTiZhongXin	44	0	0.990725	2.075	-6.325	32.25	7.675
131214	ChaoYangAoTiZhongXin	56	0	0.994175	2.075	-5.05	32	7.925
131215	ChaoYangAoTiZhongXin	40	0	0.998575	1.375	-3.925	33.5	7.75
131216	ChaoYangAoTiZhongXin	123	0	0.996575	0.85	-4.75	43.25	3.725
131217	ChaoYangAoTiZhongXin	94	0.025	0.998625	2.525	-4.55	42.25	4.05
131218	ChaoYangAoTiZhongXin	21	0	0.9976	2.425	-7.65	39.5	7.6
131219	ChaoYangAoTiZhongXin	39	0	0.995975	2.825	-7.025	38	7.75
131220	ChaoYangAoTiZhongXin	40	0	0.999525	2.55	-5.85	41	7.75
131221	ChaoYangAoTiZhongXin	46	0	1.00038	1.225	-6.4	44.75	7.325
131222	ChaoYangAoTiZhongXin	118	0	0.9974	0.975	-6.275	47.25	6.25
131223	ChaoYangAoTiZhongXin	134	0	0.997525	1.4	-5.275	50.25	7.25
131224	ChaoYangAoTiZhongXin	208	0	0.999125	0.9	-5.875	58.25	4.025
131225	ChaoYangAoTiZhongXin	200	0	0.993675	2.175	-4.85	54.5	3.475
131226	ChaoYangAoTiZhongXin	10	0	0.99905	4.025	-5.65	29.75	7.675
131227	ChaoYangAoTiZhongXin	16	0	0.995425	2.25	-6.675	38.5	6.6
131228	ChaoYangAoTiZhongXin	19	0	0.991525	2.7	-6.525	35	7.925
131229	ChaoYangAoTiZhongXin	42	0	0.98495	2.425	-4.6	35	7.475
131230	ChaoYangAoTiZhongXin	38	0	0.981975	2.475	-3.375	37.75	7.65
131231	ChaoYangAoTiZhongXin	64	0	0.978375	3.275	-1.45	37.75	7.4
140101	ChaoYangAoTiZhongXin	39	0	0.98674	1.9	0.54	36.6	7.48
140102	ChaoYangAoTiZhongXin	139	0	0.99042	1.12	-1.04	50.8	7.02
140103	ChaoYangAoTiZhongXin	139	0	0.99424	2.26	0.5	39.8	7.86
140104	ChaoYangAoTiZhongXin	47	0	0.99438	1	-3.18	61.8	3.08
140105	ChaoYangAoTiZhongXin	107	0	0.99596	1.98	-2.22	53.4	7.6
140106	ChaoYangAoTiZhongXin	111	0.06	0.99722	1.22	-2.92	71.6	0
140107	ChaoYangAoTiZhongXin	129	0	0.99852	2.2	-1.46	50.6	4.12
140108	ChaoYangAoTiZhongXin	14	0	1.00468	3.04	-5.06	26.2	7.72
140109	ChaoYangAoTiZhongXin	33	0	1.00268	1.76	-8.32	31.6	7.72
140110	ChaoYangAoTiZhongXin	52	0	1.00194	1.38	-7.38	32.6	7.52
140111	ChaoYangAoTiZhongXin	100	0	1.00206	1.48	-5.8	37.4	7.02
140112	ChaoYangAoTiZhongXin	39	0	1.00704	2.3	-4.46	26.2	8.16
140113	ChaoYangAoTiZhongXin	64	0	1.00338	1.2	-6.64	39.8	7.44
140114	ChaoYangAoTiZhongXin	95	0	1.00506	1.6	-6.3	44.8	7.52
140115	ChaoYangAoTiZhongXin	91	0	1.00266	1.02	-5.32	44	7.72
140116	ChaoYangAoTiZhongXin	392	0.02	0.99954	1.7	-2.46	51	2.26
140117	ChaoYangAoTiZhongXin	141	0	1.00252	2.04	-3.1	58.8	4.16
140118	ChaoYangAoTiZhongXin	75	0	1.0042	1.62	-3.1	47	7.74
140119	ChaoYangAoTiZhongXin	123	0	0.99636	2.78	-1.62	52.2	2.12
140120	ChaoYangAoTiZhongXin	11	0	1.00058	4.7	-3.1	28.2	8.34
140121	ChaoYangAoTiZhongXin	11	0	1.00342	1.94	-4.78	33.8	8.26
140122	ChaoYangAoTiZhongXin	108	0	0.99548	1.12	-4.26	36.2	7.42
140123	ChaoYangAoTiZhongXin	155	0	0.9889	1.12	-4.44	46.4	1.32
140124	ChaoYangAoTiZhongXin	189	0	0.98996	1.48	0.48	36.4	0
140125	ChaoYangAoTiZhongXin		0	0.99882	2.02	-0.26	25.6	6.98
140126	ChaoYangAoTiZhongXin	18	0	1.00058	1.46	-4.02	49.8	6.66
140127	ChaoYangAoTiZhongXin	102	0	0.99134	2.26	-1.86	52.4	6.34
140128	ChaoYangAoTiZhongXin	30	0	0.99944	1.94	-2.54	38.4	6.58
140129	ChaoYangAoTiZhongXin	97	0	0.98688	1.36	-3.44	63.6	2.48
140130	ChaoYangAoTiZhongXin	74	0	0.98998	2.56	-0.72	39.4	8.52
140131	ChaoYangAoTiZhongXin	130	0.02	0.99124	1.34	-2.32	62	1.72
140201	ChaoYangAoTiZhongXin	133	0.2	0.98814	1.14	0.5	74.2	0.68
140202	ChaoYangAoTiZhongXin	83	0	0.9874	3.48	1.62	44.8	7.22
140203	ChaoYangAoTiZhongXin	5	0	0.9983	4.44	-4.18	13.8	8.8
140204	ChaoYangAoTiZhongXin	12	0	1.00064	2.32	-6.56	17.4	8.24
140205	ChaoYangAoTiZhongXin	88	0	0.99976	1.26	-5.68	31.8	5.46
140206	ChaoYangAoTiZhongXin	119	0.02	1.00086	1.44	-4.62	46.2	0.66
140207	ChaoYangAoTiZhongXin	87	0.92	0.9983	1.2	-4.16	68.4	0
140208	ChaoYangAoTiZhongXin	63	0.84	0.9991	2.78	-5.22	62	5.28
140209	ChaoYangAoTiZhongXin	8	0	1.0073	3.16	-8.3	35	9
140210	ChaoYangAoTiZhongXin	15	0	1.00598	1.56	-8.14	39	8.88
140211	ChaoYangAoTiZhongXin	83	0	0.99948	1.58	-7.4	49	7.84
140212	ChaoYangAoTiZhongXin	121	0	1.00348	1.5	-5.1	45.8	8.4
140213	ChaoYangAoTiZhongXin	169	0.04	1.00576	1.1	-5.28	60	0.2
140214	ChaoYangAoTiZhongXin	220	0.02	0.99782	1.14	-3.86	67.8	2.32
140215	ChaoYangAoTiZhongXin	394	0	0.99602	1.02	-2.68	67	0.68
140216	ChaoYangAoTiZhongXin	353	0	1.00054	1.48	-0.76	53.2	6.96
140217	ChaoYangAoTiZhongXin	104	0	1.00596	1.6	-0.16	36	3.98
140218	ChaoYangAoTiZhongXin	59	0.06	1.00336	1.48	-3.14	49.8	0.32
140219	ChaoYangAoTiZhongXin	63	0.16	1.00028	1.42	-2.68	52.4	8.46
140220	ChaoYangAoTiZhongXin	173	0.06	1.00148	1.2	-3.12	68.6	3.24
140221	ChaoYangAoTiZhongXin	263	0	0.99978	1.16	-1.64	71.8	0.66
140222	ChaoYangAoTiZhongXin	266	0	1.00168	1.34	0.28	69.2	0.24
140223	ChaoYangAoTiZhongXin	194	0	1.0022	1.28	0.96	69	0
140224	ChaoYangAoTiZhongXin	235	0	0.99934	1	2.04	67.4	0.26
140225	ChaoYangAoTiZhongXin	376	0	0.99802	0.86	1.86	71.6	0.12
140226	ChaoYangAoTiZhongXin	434	0.8	0.99516	1.72	3.32	76.4	0
140227	ChaoYangAoTiZhongXin	23	0.075	0.995575	3.85	1.525	32	10.05
140228	ChaoYangAoTiZhongXin	67	0.02	0.99834	1.48	-1.12	54	0.96
140301	ChaoYangAoTiZhongXin	91	0	0.99558	1.74	1.48	42.2	9.02
140302	ChaoYangAoTiZhongXin	124	0	0.9944	1.98	1.36	41.4	8.32
140303	ChaoYangAoTiZhongXin	214	0	0.99398	1.38	0.18	51.6	0.6
140304	ChaoYangAoTiZhongXin	98	0	0.99792	2.88	2.98	32.2	10.08
140305	ChaoYangAoTiZhongXin	16	0	0.99998	2.54	0.04	27.8	9.36
140306	ChaoYangAoTiZhongXin	13	0	1.00152	2.16	-1.77636e-16	19.2	10.18
140307	ChaoYangAoTiZhongXin	49	0	1.00122	1.38	-0.18	30.2	9.28
140308	ChaoYangAoTiZhongXin	130	0	0.99548	1.86	1.32	38.6	8.02
140309	ChaoYangAoTiZhongXin	109	0	0.99778	1.82	1.88	33.6	9.24
140310	ChaoYangAoTiZhongXin	70	0	0.99562	1.42	1.88	51.6	7
140311	ChaoYangAoTiZhongXin	175	0.02	0.9903	1.88	4.9	51.4	2.3
140312	ChaoYangAoTiZhongXin	10	0.1	0.99758	2.94	4.94	23.8	9.06
140313	ChaoYangAoTiZhongXin	22	0	0.99426	2.12	3.94	22.2	9.28
140314	ChaoYangAoTiZhongXin	20	0	0.99046	2.56	7.48	20.2	10.6
140315	ChaoYangAoTiZhongXin	45	0	0.98396	1.94	10.06	23.8	9.08
140316	ChaoYangAoTiZhongXin	117	0	0.98764	2.14	10	28.8	8.04
140317	ChaoYangAoTiZhongXin	104	0	0.98494	2.98	11	35.6	7.68
140318	ChaoYangAoTiZhongXin	35	0	0.99438	1.94	10.32	29.4	6.86
140319	ChaoYangAoTiZhongXin	58	0.04	0.9948	1.94	6.64	42.2	2.7
140320	ChaoYangAoTiZhongXin	12	0	0.9989	3.24	9.5	19.6	10.9
140321	ChaoYangAoTiZhongXin	22	0	0.99326	1.92	11.02	22.6	10.42
140322	ChaoYangAoTiZhongXin	53	0	0.99074	2.36	12.1	20.6	10.66
140323	ChaoYangAoTiZhongXin	118	0	0.99584	1.56	11.06	31.6	8.24
140324	ChaoYangAoTiZhongXin	220	0	0.987	1.88	12.34	43.2	7.3
140325	ChaoYangAoTiZhongXin	224	0	0.9837	1.42	13.98	42.4	7.02
140326	ChaoYangAoTiZhongXin	209	0	0.98354	1.66	15.12	50.8	6.78
140327	ChaoYangAoTiZhongXin	253	0	0.98444	1.62	13.56	59	0.6
140328	ChaoYangAoTiZhongXin	115	4.2	0.98138	1.86	14.5	63.6	4.58
140329	ChaoYangAoTiZhongXin	61	0.04	0.98602	1.66	14.56	47.4	10.54
140330	ChaoYangAoTiZhongXin	38	0	0.98854	1.4	15.62	36	10.48
140331	ChaoYangAoTiZhongXin	132	0.92	0.98872	1.76	14.9	45.8	1.56
140401	ChaoYangAoTiZhongXin	121	0.04	0.9857	1.52	14.12	55	9.18
140402	ChaoYangAoTiZhongXin	103	0	0.98818	1.7	15.2	39.8	8.22
140403	ChaoYangAoTiZhongXin	42	0	0.99632	3.42	12	17.2	11.34
140404	ChaoYangAoTiZhongXin	32	0	0.988	3.54	12.92	22.4	10.96
140405	ChaoYangAoTiZhongXin	22	0	0.99478	2.64	11.58	20.8	11.4
140406	ChaoYangAoTiZhongXin	58	0	0.99058	2.12	14.4	21.4	10.94
140407	ChaoYangAoTiZhongXin	87	0	0.98632	1.52	16.3	29	10.22
140408	ChaoYangAoTiZhongXin	33	0	0.98644	1.64	16.84	37.8	8.24
140409	ChaoYangAoTiZhongXin	128	0	0.98484	3.04	18.84	37.2	8.98
140410	ChaoYangAoTiZhongXin	113	0.02	0.99424	2	14.72	29.8	1.68
140411	ChaoYangAoTiZhongXin	72	0.02	0.99156	1.74	13.6	37.6	2.64
140412	ChaoYangAoTiZhongXin	103	0	0.98874	1.32	13.84	41	8.52
140413	ChaoYangAoTiZhongXin	161	0	0.98986	1.56	15.82	45.6	9.58
140414	ChaoYangAoTiZhongXin	237	0	0.98928	1.68	18.02	54.2	7.88
140415	ChaoYangAoTiZhongXin	70	0	0.99178	2.6	17.8	44	3.58
140416	ChaoYangAoTiZhongXin	50	0	0.98718	1.54	15.86	35.6	0.32
140417	ChaoYangAoTiZhongXin	114	3.74	0.98544	1.54	13.4	61.8	1.2
140418	ChaoYangAoTiZhongXin	143	0	0.99172	1.6	14.86	62.2	3.68
140419	ChaoYangAoTiZhongXin	60	1.54	0.99344	1.54	11.52	58.8	1.68
140420	ChaoYangAoTiZhongXin	54	0.02	0.98962	1.54	12.28	54	8.36
140421	ChaoYangAoTiZhongXin	48	0	0.98914	1.5	15.3	35.6	10.38
140422	ChaoYangAoTiZhongXin	68	0	0.98674	2.38	17.52	31	11.22
140423	ChaoYangAoTiZhongXin		0.9	0.98372	2.6	18.68	50.2	7.06
140424	ChaoYangAoTiZhongXin		1.38	0.98722	1.48	18.22	62.8	5.7
140425	ChaoYangAoTiZhongXin		0.6	0.99002	2.52	18.2	54.8	5.46
140426	ChaoYangAoTiZhongXin		12.46	0.99344	2.46	14	60.2	8.66
140427	ChaoYangAoTiZhongXin		0	0.9936	1.66	15.9	45.8	10.88
140428	ChaoYangAoTiZhongXin		0	0.9923	1.78	17.32	40.2	11.1
140429	ChaoYangAoTiZhongXin	77	0	0.98676	1.5	18.04	40.8	11.08
140430	ChaoYangAoTiZhongXin	94	0	0.98248	1.58	19.66	46.2	10.64
140501	ChaoYangAoTiZhongXin	132	0.54	0.98154	2.44	18.88	57.6	5.28
140502	ChaoYangAoTiZhongXin	42	3.34	0.98836	3.6	13.7	38.2	7.24
140503	ChaoYangAoTiZhongXin	57	0.24	0.98592	4.06	13.88	40.8	8.42
140504	ChaoYangAoTiZhongXin	41	0	0.98958	4.64	11.52	21.4	10.5
140505	ChaoYangAoTiZhongXin	40	0	0.99018	2.22	12.24	26.6	11.86
140506	ChaoYangAoTiZhongXin	85	0	0.98204	1.88	14.36	38.4	7.66
140507	ChaoYangAoTiZhongXin	81	0.86	0.9799	2.6	16.6	42.2	10.94
140508	ChaoYangAoTiZhongXin	90	0	0.98698	2.24	16.02	43.4	8.96
140509	ChaoYangAoTiZhongXin	66	0.24	0.9881	2.98	16.66	43.4	0.96
140510	ChaoYangAoTiZhongXin	56	0.52	0.9891	2.02	16.18	45.6	1.58
140511	ChaoYangAoTiZhongXin	29	23.12	0.98024	2.2	10.64	86.8	0
140512	ChaoYangAoTiZhongXin	35	1	0.97422	2.52	19	53.2	11.5
140513	ChaoYangAoTiZhongXin	60	0	0.97448	1.86	20.18	44.6	8.5
140514	ChaoYangAoTiZhongXin	24	0	0.97878	3.26	17.56	27.8	7.2
140515	ChaoYangAoTiZhongXin	63	0	0.97422	2.06	19.18	33.8	11.14
140516	ChaoYangAoTiZhongXin	66	0.02	0.98042	2.74	22.22	27.6	12.32
140517	ChaoYangAoTiZhongXin	71	0.26	0.9862	1.98	20.16	39.8	8.32
140518	ChaoYangAoTiZhongXin	96	0.02	0.98246	1.54	21.74	45	10.1
140519	ChaoYangAoTiZhongXin	110	6.68	0.97868	1.66	21.1	63.2	7.86
140520	ChaoYangAoTiZhongXin	98	0	0.9783	2.18	23.28	44	12.4
140521	ChaoYangAoTiZhongXin	106	0.02	0.9792	1.86	23.26	49.4	9.54
140522	ChaoYangAoTiZhongXin	163	0	0.9801	2.2	26.1	46.2	10.42
140523	ChaoYangAoTiZhongXin	83	0	0.98392	2.38	26.94	38.4	8.2
140524	ChaoYangAoTiZhongXin	86	7.1	0.982	1.8	19.64	81.4	0.64
140525	ChaoYangAoTiZhongXin	86	0.02	0.98018	3.26	21.08	51.8	8.22
140526	ChaoYangAoTiZhongXin	27	0	0.97392	2.74	23.62	31.2	11.8
140527	ChaoYangAoTiZhongXin	43	0.06	0.97022	4.02	23.36	33.8	9.5
140528	ChaoYangAoTiZhongXin	33	0	0.97514	1.88	26	30.4	11.8
140529	ChaoYangAoTiZhongXin	52	0.02	0.97284	1.76	28.86	28.6	12.42
140530	ChaoYangAoTiZhongXin	91	0.02	0.97984	2.5	28.52	33.2	10.76
140531	ChaoYangAoTiZhongXin	112	0	0.98118	1.56	27.48	42.6	5.5
140601	ChaoYangAoTiZhongXin	58	4.03333	0.969533	2.03333	22.4667	61.6667	1.26667
140602	ChaoYangAoTiZhongXin	33	0.0666667	0.9714	2.06667	20.8667	53.3333	6.6
140603	ChaoYangAoTiZhongXin	38	0	0.9685	2.36667	23.1667	47.6667	11.6333
140604	ChaoYangAoTiZhongXin	60	0.0666667	0.966633	1.23333	23.6	51.3333	6.66667
140605	ChaoYangAoTiZhongXin	66	0	0.965267	1.83333	25.4667	51.3333	11.1333
140606	ChaoYangAoTiZhongXin	66	35.6	0.9654	2.43333	20.7	69	1.43333
140607	ChaoYangAoTiZhongXin	12	3.03333	0.964667	2.06667	19.7	57.6667	9.03333
140608	ChaoYangAoTiZhongXin	29	0.533333	0.9628	1.56667	19.8333	59	9.03333
140609	ChaoYangAoTiZhongXin	33	3.6	0.965567	1.93333	18.6667	64.6667	7.13333
140610	ChaoYangAoTiZhongXin	71	1.33333	0.9691	1.26667	18.8333	72.3333	3.46667
140611	ChaoYangAoTiZhongXin	52	1.9	0.970233	1.26667	21.3667	61.3333	10.5667
140612	ChaoYangAoTiZhongXin	31	0.0666667	0.967533	1.66667	23.5667	56.6667	9.03333
140613	ChaoYangAoTiZhongXin	62	4.1	0.967933	1.23333	23.1667	66	6.26667
140614	ChaoYangAoTiZhongXin	35	0	0.967367	1.4	23.9	60.3333	11.8333
140615	ChaoYangAoTiZhongXin	115	1.7	0.9654	1.76667	24.3	63.3333	3.96667
140616	ChaoYangAoTiZhongXin	132	0.533333	0.9634	1.93333	23.4667	68.3333	1.96667
140617	ChaoYangAoTiZhongXin	90	30.1667	0.962767	1.4	22.2667	72	5.56667
140618	ChaoYangAoTiZhongXin	57	3.9	0.963467	1.83333	22.6	61.3333	11.5667
140619	ChaoYangAoTiZhongXin	137	1.36667	0.9653	1.6	22.4667	61.6667	6.7
140620	ChaoYangAoTiZhongXin	44	26.0667	0.9673	1.9	21.1	74.6667	6.33333
140621	ChaoYangAoTiZhongXin	79	6.53333	0.9686	1.66667	20.5667	74	5.7
140622	ChaoYangAoTiZhongXin	31	13.8	0.969333	1.33333	19.6	78.3333	3.76667
140623	ChaoYangAoTiZhongXin	27	0	0.9684	1.5	22.7667	62.3333	12.4667
140624	ChaoYangAoTiZhongXin	56	0	0.965367	1.66667	24.4667	59.3333	10.3667
140625	ChaoYangAoTiZhongXin	95	2.13333	0.964133	1.83333	22.3	74.6667	0.9
140626	ChaoYangAoTiZhongXin	131	2.1	0.9638	1.6	24.6333	66.3333	7.83333
140627	ChaoYangAoTiZhongXin	29	0	0.9675	1.73333	25.1667	48.6667	13.2667
140628	ChaoYangAoTiZhongXin	25	0.333333	0.966767	1.4	24.8333	48.3333	11.9667
140629	ChaoYangAoTiZhongXin	42	0	0.967033	1.36667	26.2333	49.6667	11.1333
140630	ChaoYangAoTiZhongXin	80	0	0.967033	1.63333	25.6333	55	7.96667
140701	ChaoYangAoTiZhongXin	101	19.7	0.97912	2	25.38	65.2	1.28
140702	ChaoYangAoTiZhongXin	63	34.94	0.97724	1.4	22.22	85.8	1.24
140703	ChaoYangAoTiZhongXin	195	0.3	0.97512	1.2	24.66	79.2	2.42
140704	ChaoYangAoTiZhongXin	205	0.04	0.97858	1.64	26.38	72.4	7.2
140705	ChaoYangAoTiZhongXin	126	0.9	0.98078	1.58	26.26	73.4	3.64
140706	ChaoYangAoTiZhongXin	201	0	0.97914	1.32	26.5	73.2	2
140707	ChaoYangAoTiZhongXin	161	4.36	0.97712	1.84	26.52	73.8	0
140708	ChaoYangAoTiZhongXin	119	1.7	0.97652	2.14	26.64	60.2	6.92
140709	ChaoYangAoTiZhongXin	28	0	0.9786	1.34	25.16	52.4	3.52
140710	ChaoYangAoTiZhongXin	33	0	0.97462	1.76	27.34	47.2	12.36
140711	ChaoYangAoTiZhongXin	33	0	0.9744	2.04	27.16	46.2	12.2
140712	ChaoYangAoTiZhongXin	17	0.02	0.9768	2.16	26.9	40.6	11.68
140713	ChaoYangAoTiZhongXin	18	4.68	0.97676	2.26	25.86	49.6	10.92
140714	ChaoYangAoTiZhongXin	31	0.02	0.97694	1.64	26.58	50.4	10.5
140715	ChaoYangAoTiZhongXin	46	14.14	0.97802	2.22	25.56	57.2	7.9
140716	ChaoYangAoTiZhongXin	114	3.48	0.9777	1.58	24.32	73	2.46
140717	ChaoYangAoTiZhongXin	119	2.66	0.97976	1.36	24.92	76	2.82
140718	ChaoYangAoTiZhongXin	144	0	0.98122	1.3	27.82	73.2	4.32
140719	ChaoYangAoTiZhongXin	70	0	0.98242	1.78	29.9	67.6	10.08
140720	ChaoYangAoTiZhongXin	67	0.86	0.97936	2.18	30	66.6	9.94
140721	ChaoYangAoTiZhongXin	32	7.6	0.97662	2.28	27.78	63.6	3.54
140722	ChaoYangAoTiZhongXin	13	0.18	0.98064	1.12	24.92	65	0.16
140723	ChaoYangAoTiZhongXin	26	0.02	0.97844	1.58	24.62	66.8	2.12
140724	ChaoYangAoTiZhongXin	72	0.14	0.97966	1.18	25.22	67.8	1.8
140725	ChaoYangAoTiZhongXin	72	0	0.98006	1.3	26.08	59.2	11.46
140726	ChaoYangAoTiZhongXin	103	0	0.98228	1.8	27.14	56.4	11.48
140727	ChaoYangAoTiZhongXin	106	0	0.9823	1.68	28.1	54.2	10.48
140728	ChaoYangAoTiZhongXin	124	0	0.97834	1.78	28.24	60	10.08
140729	ChaoYangAoTiZhongXin		0	0.97736	2.54	28	60.8	5.46
140730	ChaoYangAoTiZhongXin	117	15.64	0.97944	1.7	24.66	76.6	2.72
140731	ChaoYangAoTiZhongXin	213	0.02	0.98082	1.64	26.46	72.2	5.34
130801	ChaoYangNongZhanGuan	218	20.54	0.9773	1.42	23.42	82.8	4.36
130802	ChaoYangNongZhanGuan	31	0.28	0.9794	1.74	25.14	78	7.42
130803	ChaoYangNongZhanGuan	49	0.66	0.97788	1.56	26.12	69.6	10.86
130804	ChaoYangNongZhanGuan	20	5.34	0.97486	2.06	26.32	72.4	9.96
130805	ChaoYangNongZhanGuan	46	12.64	0.97258	1.26	24.76	75.8	11.92
130806	ChaoYangNongZhanGuan	134	0	0.9737	1.4	27.38	78.8	5.66
130807	ChaoYangNongZhanGuan	90	27.92	0.9766	1.76	24.38	84.2	2
130808	ChaoYangNongZhanGuan	33	1.16	0.9751	1.88	25.66	75.4	9.36
130809	ChaoYangNongZhanGuan	36	0.2	0.97572	1.7	26.28	67.6	12.3
130810	ChaoYangNongZhanGuan	82	0	0.97912	1.44	27.86	72.8	9.1
130811	ChaoYangNongZhanGuan	160	7.44	0.98064	1.7	26.96	83.4	0.92
130812	ChaoYangNongZhanGuan	99	5.86	0.97928	1.44	25.24	84	4.06
130813	ChaoYangNongZhanGuan	75	0	0.979	1.48	27.14	78.8	8.78
130814	ChaoYangNongZhanGuan	76	4.08	0.97858	1.74	27.68	77.6	7.56
130815	ChaoYangNongZhanGuan	83	0.08	0.9773	1.3	28.32	78.8	2.02
130816	ChaoYangNongZhanGuan	127	22.22	0.97246	1.48	27.14	86.2	1.3
130817	ChaoYangNongZhanGuan	139	0	0.97542	2.04	28.52	59	11.26
130818	ChaoYangNongZhanGuan	18	0	0.98204	2.06	27.02	49.4	11.76
130819	ChaoYangNongZhanGuan	21	0	0.9845	1.36	25.4	57.6	11.22
130820	ChaoYangNongZhanGuan	97	2.68	0.98364	1.38	24.6	71	2.18
130821	ChaoYangNongZhanGuan	126	0.56	0.98198	1.42	25.08	74.4	7.92
130822	ChaoYangNongZhanGuan	108	0.06	0.98294	0.96	23.46	80.4	1.24
130823	ChaoYangNongZhanGuan	98	0.02	0.9834	1.5	25.36	63.4	9.84
130824	ChaoYangNongZhanGuan	35	0	0.9835	1.54	25.6	56.8	10.74
130825	ChaoYangNongZhanGuan	39	0.12	0.98118	1.42	25.66	60.2	11.6
130826	ChaoYangNongZhanGuan	44	0	0.98006	1.86	25.72	60.4	11.16
130827	ChaoYangNongZhanGuan	64	0	0.98146	1.5	23.7	74.4	1.5
130828	ChaoYangNongZhanGuan	54	30.1	0.97468	1.46	22.04	89.6	0
130829	ChaoYangNongZhanGuan	64	0	0.97658	2.84	22.06	64.2	7.54
130830	ChaoYangNongZhanGuan	7	0.38	0.98546	2.08	20.46	53.6	10.96
130831	ChaoYangNongZhanGuan	20	0.72	0.98602	1.44	20.06	59	11.14
130901	ChaoYangNongZhanGuan	34	0.05	0.981875	1.55	19.675	65	9.5
130902	ChaoYangNongZhanGuan	44	2.575	0.983875	1.475	19.65	68.25	10.925
130903	ChaoYangNongZhanGuan	90	0	0.984475	1.55	20.15	68	10.025
130904	ChaoYangNongZhanGuan	83	0.875	0.984025	1.3	19.05	79.75	0.525
130905	ChaoYangNongZhanGuan	27	21.3	0.98275	1.6	17.575	84	5.55
130906	ChaoYangNongZhanGuan	41	3.225	0.98405	1.4	18.075	78.5	7.1
130907	ChaoYangNongZhanGuan	79	1.2	0.984925	1.4	19.325	73.75	10.175
130908	ChaoYangNongZhanGuan	72	0.6	0.9847	1.3	19.5	78.25	5.325
130909	ChaoYangNongZhanGuan	109	3.175	0.980925	1.325	19.725	81.25	4.475
130910	ChaoYangNongZhanGuan	92	0.425	0.980625	1.7	19.95	69	9.025
130911	ChaoYangNongZhanGuan	40	0	0.9828	1.575	19.025	68.25	10.55
130912	ChaoYangNongZhanGuan	99	1.175	0.98025	1.85	20.325	76.5	5.775
130913	ChaoYangNongZhanGuan	106	10.45	0.974875	1.55	18.95	87	3.025
130914	ChaoYangNongZhanGuan	102	0.675	0.97675	1.7	20.7	63.75	9.725
130915	ChaoYangNongZhanGuan	19	0	0.981925	1.325	17.6	52.5	10.15
130916	ChaoYangNongZhanGuan	37	0	0.9797	1.4	18.375	69.75	8.325
130917	ChaoYangNongZhanGuan	68	1.8	0.982925	1.075	18.925	83.5	1.35
130918	ChaoYangNongZhanGuan	89	5.325	0.986975	1.3	19.875	86.5	1.925
130919	ChaoYangNongZhanGuan	102	1.7	0.981475	1.675	20.4	80.25	3.675
130920	ChaoYangNongZhanGuan	119	0	0.9837	1.025	19.925	67.75	8.25
130921	ChaoYangNongZhanGuan	39	0	0.98365	1.375	20.875	66.25	9.625
130922	ChaoYangNongZhanGuan	51	0.05	0.98305	1.325	19.125	77.75	0.4
130923	ChaoYangNongZhanGuan	63	10.325	0.985875	2.275	14.85	68.75	0.775
130924	ChaoYangNongZhanGuan	9	0	0.989525	1.575	12.1	59.25	9.4
130925	ChaoYangNongZhanGuan		0	0.988325	1.925	12.775	54	10.9
130926	ChaoYangNongZhanGuan	38	0	0.984925	1.475	14.275	58.25	10.675
130927	ChaoYangNongZhanGuan	142	0	0.979625	1.425	15.225	67.5	9.35
130928	ChaoYangNongZhanGuan	240	0	0.978825	1.125	14.85	77.75	3.25
130929	ChaoYangNongZhanGuan	238	0	0.9852	0.975	16.025	77.75	0
130930	ChaoYangNongZhanGuan	228	0	0.986525	0.8	16.875	82.25	0
131001	ChaoYangNongZhanGuan	125	14	0.99056	2.08	16.32	81.4	4.16
131002	ChaoYangNongZhanGuan	24	0	0.99432	1.74	14.04	60.4	10.62
131003	ChaoYangNongZhanGuan	55	0	0.9915	1.68	14.04	66.6	9.6
131004	ChaoYangNongZhanGuan	118	0	0.98744	1.1	15.32	78.2	5.16
131005	ChaoYangNongZhanGuan	285	0	0.99266	0.92	16.74	77.8	3
131006	ChaoYangNongZhanGuan	246	0	0.99558	1.46	16.14	81	3.84
131007	ChaoYangNongZhanGuan	113	0	0.99584	1.88	16.9	62.6	8.06
131008	ChaoYangNongZhanGuan	52	2.06	0.99316	1.44	15.58	64.6	7.78
131009	ChaoYangNongZhanGuan	94	0	0.98458	0.92	14.36	79.6	3.7
131010	ChaoYangNongZhanGuan	117	0.04	0.98404	2.54	15.24	61.4	6.84
131011	ChaoYangNongZhanGuan	32	0	0.98854	1.44	13	56.8	10.02
131012	ChaoYangNongZhanGuan	72	0.02	0.99176	1.4	14.3	56.8	6.94
131013	ChaoYangNongZhanGuan	54	2.22	0.99216	1.44	13.42	74.6	0.46
131014	ChaoYangNongZhanGuan	55	0.52	0.99916	2.6	11.08	56.6	1.04
131015	ChaoYangNongZhanGuan	14	0	1.0032	1.38	7.16	51.8	9.96
131016	ChaoYangNongZhanGuan	34	0	0.9983	1.24	9.06	54	9.84
131017	ChaoYangNongZhanGuan	93	0	0.99894	1.12	9.76	63	8.84
131018	ChaoYangNongZhanGuan		0.02	0.99784	0.88	10.1	71.4	4.66
131019	ChaoYangNongZhanGuan		0.8	0.99834	2.22	11.68	56.2	6.56
131020	ChaoYangNongZhanGuan		0	0.99788	1.12	10.08	55	9.3
131021	ChaoYangNongZhanGuan		0	0.99602	0.92	9.7	62.2	8.06
131022	ChaoYangNongZhanGuan		4.44	0.995	1.9	9.38	71.6	3.76
131023	ChaoYangNongZhanGuan		2.26	0.99504	2.66	7.44	51.8	8.7
131024	ChaoYangNongZhanGuan		0	0.99936	2.94	7.78	44.8	8.06
131025	ChaoYangNongZhanGuan		0	0.99996	1.2	8.22	58.4	8.9
131026	ChaoYangNongZhanGuan		0	0.9956	1.38	7.76	60.4	9.02
131027	ChaoYangNongZhanGuan		0	0.99076	0.8	7.58	68.4	7.24
131028	ChaoYangNongZhanGuan		0.02	0.99264	1.36	8.94	72.2	1.6
131029	ChaoYangNongZhanGuan		0.02	1.00018	2.12	8.68	56.2	8.2
131030	ChaoYangNongZhanGuan		0	1.0004	1.12	6.5	63.6	8.54
131031	ChaoYangNongZhanGuan		0	1.00002	0.88	6.72	69	4.04
131101	ChaoYangNongZhanGuan	220	0.04	0.99846	1.04	7.6	72.2	2.2
131102	ChaoYangNongZhanGuan	245	0	0.9946	1.22	8.46	78	4.16
131103	ChaoYangNongZhanGuan	75	0.18	0.99682	2.8	10.4	55.8	8.4
131104	ChaoYangNongZhanGuan	13	0	1.00068	1.3	7.96	53.4	9.2
131105	ChaoYangNongZhanGuan	165	0.02	0.9936	1.02	7.74	62.8	1.4
131106	ChaoYangNongZhanGuan	143	0	0.9899	3.14	7.78	54	7.94
131107	ChaoYangNongZhanGuan		0	0.99324	1.88	6.62	39.8	9.04
131108	ChaoYangNongZhanGuan	84	0	0.99306	0.9	5.82	54.4	5.4
131109	ChaoYangNongZhanGuan	120	0	0.9962	2.1	8.02	50.4	0.76
131110	ChaoYangNongZhanGuan	13	0	1.00148	3.66	2.72	17.6	8.88
131111	ChaoYangNongZhanGuan	29	0	1.00034	2.02	4.78	34.4	8.76
131112	ChaoYangNongZhanGuan	60	0	0.99744	1.5	5.36	47.2	8.74
131113	ChaoYangNongZhanGuan	168	0	0.9935	0.98	4.06	63	1.08
131114	ChaoYangNongZhanGuan	86	0	0.99094	2.36	5.54	46.2	8.3
131115	ChaoYangNongZhanGuan	95	0	0.98992	1.2	4.76	46.4	8.16
131116	ChaoYangNongZhanGuan	64	0	0.99112	3.28	6.16	36.4	7.54
131117	ChaoYangNongZhanGuan	8	0	0.99632	3.28	2.34	38.2	8.54
131118	ChaoYangNongZhanGuan	8	0	0.9984	3.52	1.66	30.6	8.56
131119	ChaoYangNongZhanGuan	29	0	0.99676	2.24	0.62	30.4	8.36
131120	ChaoYangNongZhanGuan	65	0	0.99576	1.1	1.22	47.4	8.4
131121	ChaoYangNongZhanGuan		0	0.9981	1.12	1.52	53.8	8.04
131122	ChaoYangNongZhanGuan	133	0	0.9969	1.14	2.4	54.8	8.22
131123	ChaoYangNongZhanGuan	241	0	0.9929	1.5	3.04	55.2	6.22
131124	ChaoYangNongZhanGuan	130	0	0.98836	2.22	4.1	47.6	0.36
131125	ChaoYangNongZhanGuan		0	0.9891	3.02	1.74	32.6	8.34
131126	ChaoYangNongZhanGuan	21	0	0.99074	3.54	-1.28	33.4	7.86
131127	ChaoYangNongZhanGuan	7	0	0.9977	5.6	-4.58	19.8	8.16
131128	ChaoYangNongZhanGuan	12	0	0.99808	2.82	-2.9	23.8	8.24
131129	ChaoYangNongZhanGuan	46	0	0.99264	1.7	1.04	38.4	8.32
131130	ChaoYangNongZhanGuan	59	0	0.99512	2.1	1.58	36.4	8.3
131201	ChaoYangNongZhanGuan	74	0	0.989675	1.425	-1.075	45.5	8.15
131202	ChaoYangNongZhanGuan	113	0	0.985675	1.15	-0.25	47.25	7.35
131203	ChaoYangNongZhanGuan	89	0	0.988525	1.25	1.575	45.5	8
131204	ChaoYangNongZhanGuan	101	0	0.98685	1.175	1.025	51.75	6.325
131205	ChaoYangNongZhanGuan	53	0	0.9901	2.1	2.025	38	8.15
131206	ChaoYangNongZhanGuan	127	0	0.986075	1.225	-0.4	49	7.25
131207	ChaoYangNongZhanGuan	270	0	0.98615	0.9	-0.875	62.75	3.725
131208	ChaoYangNongZhanGuan	278	0	0.987025	2.175	1.55	55.75	0.45
131209	ChaoYangNongZhanGuan	54	0	0.989725	3.1	-1.15	37.5	7.975
131210	ChaoYangNongZhanGuan	33	0	0.9852	2.85	-2.775	41.75	6.275
131211	ChaoYangNongZhanGuan	19	0	0.9854	2.225	-2.825	35.5	6.525
131212	ChaoYangNongZhanGuan	24	0	0.986975	3.65	-4.925	27.5	7.95
131213	ChaoYangNongZhanGuan	55	0	0.990725	2.075	-6.325	32.25	7.675
131214	ChaoYangNongZhanGuan	54	0	0.994175	2.075	-5.05	32	7.925
131215	ChaoYangNongZhanGuan	41	0	0.998575	1.375	-3.925	33.5	7.75
131216	ChaoYangNongZhanGuan	166	0	0.996575	0.85	-4.75	43.25	3.725
131217	ChaoYangNongZhanGuan	113	0.025	0.998625	2.525	-4.55	42.25	4.05
131218	ChaoYangNongZhanGuan	26	0	0.9976	2.425	-7.65	39.5	7.6
131219	ChaoYangNongZhanGuan	46	0	0.995975	2.825	-7.025	38	7.75
131220	ChaoYangNongZhanGuan	37	0	0.999525	2.55	-5.85	41	7.75
131221	ChaoYangNongZhanGuan	47	0	1.00038	1.225	-6.4	44.75	7.325
131222	ChaoYangNongZhanGuan	141	0	0.9974	0.975	-6.275	47.25	6.25
131223	ChaoYangNongZhanGuan	170	0	0.997525	1.4	-5.275	50.25	7.25
131224	ChaoYangNongZhanGuan	262	0	0.999125	0.9	-5.875	58.25	4.025
131225	ChaoYangNongZhanGuan	189	0	0.993675	2.175	-4.85	54.5	3.475
131226	ChaoYangNongZhanGuan	9	0	0.99905	4.025	-5.65	29.75	7.675
131227	ChaoYangNongZhanGuan	13	0	0.995425	2.25	-6.675	38.5	6.6
131228	ChaoYangNongZhanGuan	22	0	0.991525	2.7	-6.525	35	7.925
131229	ChaoYangNongZhanGuan	51	0	0.98495	2.425	-4.6	35	7.475
131230	ChaoYangNongZhanGuan	37	0	0.981975	2.475	-3.375	37.75	7.65
131231	ChaoYangNongZhanGuan	65	0	0.978375	3.275	-1.45	37.75	7.4
140101	ChaoYangNongZhanGuan	42	0	0.98674	1.9	0.54	36.6	7.48
140102	ChaoYangNongZhanGuan	124	0	0.99042	1.12	-1.04	50.8	7.02
140103	ChaoYangNongZhanGuan	123	0	0.99424	2.26	0.5	39.8	7.86
140104	ChaoYangNongZhanGuan	47	0	0.99438	1	-3.18	61.8	3.08
140105	ChaoYangNongZhanGuan	122	0	0.99596	1.98	-2.22	53.4	7.6
140106	ChaoYangNongZhanGuan	121	0.06	0.99722	1.22	-2.92	71.6	0
140107	ChaoYangNongZhanGuan	132	0	0.99852	2.2	-1.46	50.6	4.12
140108	ChaoYangNongZhanGuan	14	0	1.00468	3.04	-5.06	26.2	7.72
140109	ChaoYangNongZhanGuan	22	0	1.00268	1.76	-8.32	31.6	7.72
140110	ChaoYangNongZhanGuan	63	0	1.00194	1.38	-7.38	32.6	7.52
140111	ChaoYangNongZhanGuan	130	0	1.00206	1.48	-5.8	37.4	7.02
140112	ChaoYangNongZhanGuan	49	0	1.00704	2.3	-4.46	26.2	8.16
140113	ChaoYangNongZhanGuan	83	0	1.00338	1.2	-6.64	39.8	7.44
140114	ChaoYangNongZhanGuan	136	0	1.00506	1.6	-6.3	44.8	7.52
140115	ChaoYangNongZhanGuan	112	0	1.00266	1.02	-5.32	44	7.72
140116	ChaoYangNongZhanGuan	445	0.02	0.99954	1.7	-2.46	51	2.26
140117	ChaoYangNongZhanGuan	158	0	1.00252	2.04	-3.1	58.8	4.16
140118	ChaoYangNongZhanGuan	104	0	1.0042	1.62	-3.1	47	7.74
140119	ChaoYangNongZhanGuan	136	0	0.99636	2.78	-1.62	52.2	2.12
140120	ChaoYangNongZhanGuan	12	0	1.00058	4.7	-3.1	28.2	8.34
140121	ChaoYangNongZhanGuan	10	0	1.00342	1.94	-4.78	33.8	8.26
[truncated: 10,776 more rows]
