# Supplementary material for: PM2.5 Spatiotemporal Variations and the Relationship with Meteorological Factors during 2013-2014 in Beijing, China
Source: PLoS One. 2015 Nov 3;10(11):e0141642. doi: 10.1371/journal.pone.0141642 (PMC4631325; doi:10.1371/journal.pone.0141642)
Supplement: S1 Table — (XLSX) [file pone.0141642.s003.xlsx]

## Sheet: Table S1
S1 Table. Correlation coefficient matrix of PM2.5 and meteorological factors.
variable	PM2.5	WS0	WS1	WS2	WS3	RH0	RH1	RH2	RH3	T0	T1	T2	T3	P0	P1	P2	P3	AP0	AP1	AP2	AP3	SH0	SH1	SH2	SH3
PM2.5	1	-0.301941	-0.475963	-0.241402	-0.0397372	0.383155	0.21905	-0.0352336	-0.1193	-0.0513726	-0.100567	-0.130722	-0.150743	0.00754135	-0.134747	-0.194725	-0.136203	0.166889	0.2016	0.245853	0.260499	-0.511597	-0.232501	0.0441818	0.127779
WS0	-0.301941	1	0.400305	0.189712	0.164249	-0.494379	-0.20873	-0.189993	-0.206614	-0.0279209	-0.0185484	-0.0232809	-0.0341875	-0.0142949	-0.0518173	-0.072898	-0.108256	-0.0676843	-0.110188	-0.0864041	-0.071536	0.267458	0.00495959	0.0207861	0.0550148
WS1	-0.475963	0.400305	1	0.395984	0.187453	-0.465055	-0.489493	-0.204071	-0.184629	-0.0846988	-0.0234319	-0.0132005	-0.0179638	-0.0898134	-0.00810702	-0.0538238	-0.0702595	-0.0469114	-0.0706773	-0.113475	-0.089383	0.264638	0.26862	0.00863407	0.0158748
WS2	-0.241402	0.189712	0.395984	1	0.397489	-0.355692	-0.467015	-0.491741	-0.206213	-0.0683646	-0.0874678	-0.0265961	-0.0164222	-0.138165	-0.0935656	-0.00566602	-0.0560822	-0.0762223	-0.045321	-0.0687969	-0.111737	0.178299	0.262101	0.264919	0.0117343
WS3	-0.0397372	0.164249	0.187453	0.397489	1	-0.283468	-0.361245	-0.473818	-0.494062	-0.0462091	-0.0745692	-0.0929088	-0.0337705	-0.090769	-0.142794	-0.0983909	-0.00528193	-0.0835068	-0.0725396	-0.041249	-0.06421	0.107322	0.178775	0.262969	0.268882
RH0	0.383155	-0.494379	-0.465055	-0.355692	-0.283468	1	0.755155	0.574942	0.49067	0.405266	0.421721	0.429653	0.424437	0.517082	0.341537	0.222338	0.241927	-0.135929	-0.107563	-0.108152	-0.113821	-0.464429	-0.235425	-0.0292274	0.0512851
RH1	0.21905	-0.20873	-0.489493	-0.467015	-0.361245	0.755155	1	0.755077	0.576547	0.424339	0.405209	0.422309	0.42957	0.390187	0.518912	0.334457	0.227101	-0.113748	-0.137047	-0.108668	-0.108578	-0.194748	-0.458897	-0.227991	-0.0309903
RH2	-0.0352336	-0.189993	-0.204071	-0.491741	-0.473818	0.574942	0.755077	1	0.756825	0.406573	0.423826	0.40565	0.421569	0.261716	0.392357	0.511604	0.339764	-0.0896841	-0.11441	-0.137648	-0.108483	-0.0395175	-0.189268	-0.450675	-0.229274
RH3	-0.1193	-0.206614	-0.184629	-0.206213	-0.494062	0.49067	0.576547	0.756825	1	0.39818	0.409355	0.426728	0.4088	0.199489	0.265468	0.389026	0.514555	-0.0932868	-0.0919844	-0.116943	-0.139719	0.0385183	-0.0350733	-0.183175	-0.452618
T0	-0.0513726	-0.0279209	-0.0846988	-0.0683646	-0.0462091	0.405266	0.424339	0.406573	0.39818	1	0.980842	0.964694	0.954399	0.408838	0.414534	0.419843	0.436503	-0.457652	-0.457664	-0.449744	-0.444243	0.219288	0.230654	0.239169	0.231765
T1	-0.100567	-0.0185484	-0.0234319	-0.0874678	-0.0745692	0.421721	0.405209	0.423826	0.409355	0.980842	1	0.980912	0.964648	0.457609	0.411541	0.406135	0.425377	-0.44782	-0.458442	-0.45855	-0.449846	0.170489	0.226048	0.240062	0.236957
T2	-0.130722	-0.0232809	-0.0132005	-0.0265961	-0.0929088	0.429653	0.422309	0.40565	0.426728	0.964694	0.980912	1	0.981248	0.464877	0.460921	0.403529	0.411064	-0.443324	-0.448835	-0.459655	-0.459048	0.167869	0.176943	0.234923	0.236449
T3	-0.150743	-0.0341875	-0.0179638	-0.0164222	-0.0337705	0.424437	0.42957	0.421569	0.4088	0.954399	0.964648	0.981248	1	0.457556	0.468077	0.451151	0.409747	-0.439212	-0.444368	-0.449905	-0.459843	0.184914	0.17526	0.187498	0.232502
P0	0.00754135	-0.0142949	-0.0898134	-0.138165	-0.090769	0.517082	0.390187	0.261716	0.199489	0.408838	0.457609	0.464877	0.457556	1	0.371412	0.172802	0.147336	-0.263085	-0.265489	-0.259563	-0.282733	-0.286316	-0.155867	0.118058	0.211659
P1	-0.134747	-0.0518173	-0.00810702	-0.0935656	-0.142794	0.341537	0.518912	0.392357	0.265468	0.414534	0.411541	0.460921	0.468077	0.371412	1	0.364182	0.17767	-0.245797	-0.265759	-0.268413	-0.261894	0.107721	-0.279605	-0.146797	0.112469
P2	-0.194725	-0.072898	-0.0538238	-0.00566602	-0.0983909	0.222338	0.334457	0.511604	0.389026	0.419843	0.406135	0.403529	0.451151	0.172802	0.364182	1	0.36655	-0.237014	-0.241362	-0.260682	-0.262944	0.194468	0.110622	-0.27712	-0.141028
P3	-0.136203	-0.108256	-0.0702595	-0.0560822	-0.00528193	0.241927	0.227101	0.339764	0.514555	0.436503	0.425377	0.411064	0.409747	0.147336	0.17767	0.36655	1	-0.242956	-0.239459	-0.244324	-0.263601	0.219345	0.195551	0.112082	-0.280347
AP0	0.166889	-0.0676843	-0.0469114	-0.0762223	-0.0835068	-0.135929	-0.113748	-0.0896841	-0.0932868	-0.457652	-0.44782	-0.443324	-0.439212	-0.263085	-0.245797	-0.237014	-0.242956	1	0.945365	0.919346	0.906142	-0.131112	-0.164871	-0.191034	-0.186535
AP1	0.2016	-0.110188	-0.0706773	-0.045321	-0.0725396	-0.107563	-0.137047	-0.11441	-0.0919844	-0.457664	-0.458442	-0.448835	-0.444368	-0.265489	-0.265759	-0.241362	-0.239459	0.945365	1	0.945454	0.919661	-0.145831	-0.134601	-0.169618	-0.188608
AP2	0.245853	-0.0864041	-0.113475	-0.0687969	-0.041249	-0.108152	-0.108668	-0.137648	-0.116943	-0.449744	-0.45855	-0.459655	-0.449905	-0.259563	-0.268413	-0.260682	-0.244324	0.919346	0.945454	1	0.945523	-0.14304	-0.149658	-0.139998	-0.167124
AP3	0.260499	-0.071536	-0.089383	-0.111737	-0.06421	-0.113821	-0.108578	-0.108483	-0.139719	-0.444243	-0.449846	-0.459048	-0.459843	-0.282733	-0.261894	-0.262944	-0.263601	0.906142	0.919661	0.945523	1	-0.144977	-0.146983	-0.155072	-0.138217
SH0	-0.511597	0.267458	0.264638	0.178299	0.107322	-0.464429	-0.194748	-0.0395175	0.0385183	0.219288	0.170489	0.167869	0.184914	-0.286316	0.107721	0.194468	0.219345	-0.131112	-0.145831	-0.14304	-0.144977	1	0.369127	0.0284484	-0.0833319
SH1	-0.232501	0.00495959	0.26862	0.262101	0.178775	-0.235425	-0.458897	-0.189268	-0.0350733	0.230654	0.226048	0.176943	0.17526	-0.155867	-0.279605	0.110622	0.195551	-0.164871	-0.134601	-0.149658	-0.146983	0.369127	1	0.369933	0.0253787
SH2	0.0441818	0.0207861	0.00863407	0.264919	0.262969	-0.0292274	-0.227991	-0.450675	-0.183175	0.239169	0.240062	0.234923	0.187498	0.118058	-0.146797	-0.27712	0.112082	-0.191034	-0.169618	-0.139998	-0.155072	0.0284484	0.369933	1	0.363384
SH3	0.127779	0.0550148	0.0158748	0.0117343	0.268882	0.0512851	-0.0309903	-0.229274	-0.452618	0.231765	0.236957	0.236449	0.232502	0.211659	0.112469	-0.141028	-0.280347	-0.186535	-0.188608	-0.167124	-0.138217	-0.0833319	0.0253787	0.363384	1
WS: Wind Speed, RH: Relative Humidity, T: Temperature, P: Precipitation, AP: Air Pressure, SH, Sunlight hour, subscript 0/1/2/3: lagged days
