# Supplementary material for: PM2.5 Spatiotemporal Variations and the Relationship with Meteorological Factors during 2013-2014 in Beijing, China
Source: PLoS One. 2015 Nov 3;10(11):e0141642. doi: 10.1371/journal.pone.0141642 (PMC4631325; doi:10.1371/journal.pone.0141642)
Supplement: S2 Database — (XLSX) [file pone.0141642.s002.xlsx]

## Sheet: Sheet1
date	local time	DongChengDongSi	DongChengTianTan	XiChengGuanYuan	XiChengWanShouXiGong	ChaoYangAoTiZhongXin	ChaoYangNongZhanGuan	HaiDianWanLiu	HaiDianBeiBuXinQu	HaiDianBeiJingZhiWuYuan	FengTaiHuaYuan	FengTaiYunGang	ShiJingShanGuCheng	FangShanLiangXiang	DaXingHuangCunZhen	YiZhuangKaiFaQu	TongZhouXinCheng	ShunYiXinCheng	ChangPingZhen	MenTouGouLongQuanZhen	PingGuZhen	HuaiRouZhen	MiYunZhen	YanQingZhen	ChangPingDingLing	JingXiBeiBaDaLing	JingDongBeiMiYunShuiKu	JingDongDongGaoCun	JingDongNanYongLeDian	JingNanYuFa	JingXiNanLiuLiHe	QianMenDongDaJie	YongDingMenNeiDaJie	XiZhiMenBeiDaJie	NanSanHuanXiLu	DongSiHuanBeiLu
20131206	0	78	90	80	89	60	80	99	73	43	126	86	101	143	113	101	100	139	50	42	35	45	52	66	37	22	10	37	108	98	140	94	95	66	104	67
20131206	1	93	93	97	111	69	84	112	69	56	151	106	80	147	124	111	99	121	59	35	26	36	45	68	56	27		54	82		152	89	105	78	126	73
20131206	2	122	121	125	137	90	105	125	63	60	167	81	55	148	134	117	99	132	36	26	24	38	49	59	42	31	12	57	94	130	155	122	131	103	149	92
20131206	3	135	135	129	149	112	126	124	73	53	181	66	48	162	149	135	113	96	82	40	30	30	38	64	33	37		65	102	120	156	167	152	107	162	109
20131206	4	141	146	135	163	121	131	116	71	49	189	66	43	169	144	136	122	81	51	26	30	28	26	64	32	41	14	73	91	99	167	178	164	117	172	128
20131206	5	155	152	143	164	116	143	108	86	51	204	55	31	173	150	142	131	70	34	39	22	31	36	60	37	38		88	89	99	177	181	163	124	181	181
20131206	6	156	150	120	175	115	166	113	72	48	195	57	37	167	156	150	141	66	38	49	31	27	35	49	34	45		98	88	89	183	187	170	80	223	185
20131206	7	152	155	102	188	95	163	111	75	51	194	66	49	192	166	152	166	62	55	45	36	37	34	51	34	39	15	108	112	103	180	169	179	83	198	164
20131206	8	135	166	100	191	75	161	128	85	56	198	86	66	185	174	163	229	65	64	59	109	48	38	46	38	55	23	110	113	105	189	183	179	101	191	141
20131206	9	99	164	97	182	68	129	119	87	57	188	94	85	135	189	179	199	59	70	40	109	45	52	59	48	63		105	121	112	216	142	174	78	202	134
20131206	10	90	159	90	124	85	131	95	100	69	147	100	83	139	199	220	297	86	78	40	152	67	51	99	64	67	42	109	150	131	223	120	145	73	191	146
20131206	11	108	125	94	114	114	125	106	141	104	146		85	149	250	230	285	85	111	60	153		44	119	72	68		143	172	198	258	105	134	84	156	126
20131206	12	115	118	98	105	114	122	110	156	115	156		90	198	293	222	276	94	120	90	211		50	83	104	49		169	181	179	284	108	125	91	168	142
20131206	13	90	179	105	153	103	123	99	116	94	188		97	233	216	219	264	114	117	98	216		63	85	128	41		154	177	183	248	102	252	86	215	104
20131206	14	112	248	113	220	79	91	119	123	89		163	108	258	207	187	182	126	117	97	207		68	64	129	41	54	124	158	186	248	102	252	86	215	104
20131206	15	237	275	196	245	104	188	171	104	90		161	156	209	164	165	224	119	118	99	166	21	71	34	124	39	52	112	136	183	204	244	281	131	259	145
20131206	16	242	206	217	205	217	240	218	102	118		158	92	216	105	177	190	110	111	88	129	99	76	39	113	47		109	137	191	241	272	212	213	221	219
20131206	17	189	137	114	114	198	203	114	124	76		215	104	226	197	142	184	158	139	86		109	95	53	116	50		124	157	198	368	166	122	127	129	184
20131206	18	107	117	97	140	124	113	118	115	82	198	215	193	252	253	215	180	201	151	167	245	123	122	71		45		179	193	272	395	139	116	89	148	123
20131206	19	124	133	151	194	112	118	195	161	106	243	210	200	287	296	286	216	220	153	190	297	176	153	97		49		169	227	281	417	141	171	119	170	111
20131206	20	153	157	181	187	152	127	204	143	102	282	237	209	321	319	278	304	227	151	164	263	156	191	111	3	89		167	300	252	444	181	182	152	197	114
20131206	21	136	178	188	217	188	134	176	162	114	282	248	225	383	303	277	335	249	131	118	234	135	150	106	93	70		160	319	240	433	177	245	147	244	217
20131206	22	165	187	170	262	167	182	215	183	141	310	295	243	389	344	264	355	331	127	106	230	125	166	113	120	75		152	390	277	477	240	292	143	280	245
20131206	23	232	223	182	284	204	254	213	191	137	371	276	234	406	357	236	381	321	130	102	210	127	167	117	125	65		153	380	260	465	277	331	161	343	248
20131207	0	272	282	210	327	285	267	211	202	146	424	243	188	410	357	275	439	273	132	98	195	121	150	130	112	65		150	378	265	491	359	345	185	341	290
20131207	1	307	293	267	330	316	325	194	199	153	429	246	170	357	339	319	396	203	126	79	200	124	127	120	108	58		156	402	283	478	376	341	249	383	338
20131207	2	308	298	274	327	313	363	250	199	146	407	146	186	363	390	310	370	146	101	73	203	108	106	142	109	50	62	154	408	294	480	331	327	267	375	358
20131207	3	345	307	297	298	300	378	257	191	161	381	128	202	339	431	342	346	151	96	77	170	118	90	131	94	66	66	156	393	284	409	310	307	297	362	359
20131207	4	355	296	330	329	271	325	258	171	165	313	134	186	239	440	357	343	125	115	69	162	125	81	125	92	63	84	156	395	284	322	383	332	302	323	326
20131207	5	280	309	287	321	225	273	222	174	178	297	144	202	194	403	358	322	101	120	65	155	114	72	104	89	61		157	382	296	270	371	336	225	334	303
20131207	6	235	292	208	276	131	261	209	185	192	304	131	191	198	356	294	288	90	106	61	182	113	70	107	89	76		158	376	325	227	311	295	169	312	303
20131207	7	157	268	152	191	85	208	222	181	179	273	112	127	168	387	264	254	76	140	70	158	121	76	91	93	74	65	158	367	317	172	209	221	139	258	285
20131207	8	107	185	122	129	111	184	202	205	185	232	109	112	151	419	264	276	76	178	66	162	124	90	81	118	70		161	392	316	153	144	156	107	173	230
20131207	9	125	137	116	142	102	163	207	225	165	178	114	139	151	333	272	325	69	155	83	174	125		97	124	85	60	169	409	385	137	118	139	95	132	181
20131207	10	144	138	151	168	115	171	194	263	200	157	147	155	170	322	315	294	95	146	71	172	134	119	103	137	93	62	178	410	417	167	127	152	134	167	147
20131207	11	265	233	219	206	165	223	188	259	217	196	152	153	171	350	323	307	106	210	97	241	123	90	141	174	87	52	233	433	486	167	235	249	183	259	183
20131207	12	269	284	251	295	202	250	197	214	195	236	191	184	208	404	340	358	125	270	141	321	125	86	151	205	86		228	438	495	219	264	298	205	279	218
20131207	13	285	287	269	297	241	284	241	217	220	279	227	216	281	375	360	357	175	222	201	253	122	96	138	253	83	74	252	451	483	255	297	295	235	291	252
20131207	14	316	325	286	313	276	352	276	240	235	326	264	235	341	354	370	368	217	222	201	253	122	96	138	253	83	74	252	451	483	255	297	295	235	291	252
20131207	15	366	354	303	346	292	381	295	252	257	321	360	255	365	361	386	356	275	237	253	207	170	187	93	232	157		239	453	456	383	351	358	272	318	339
20131207	16	395	360	354	363	328	404	314	268	266	362	350	277	386	403	406	357	313	221	275	246	212	200	103	223	128		226	448	450	397	413	365	314	337	364
20131207	17	423	376	388	381	366	424	342	279	263	385	387	286	372	455	422	355	331	251	335	247	209	218	131	225	167		221	429	447	403	390	388	355	358	378
20131207	18	424	375	405	416	388	422	370	272	272	430	420	314	446	476	429	396	342	294	362	270	224	243	128	237	235		239	453	487	417	412	425	383	381	388
20131207	19	413	395	405	437	385	427	413	277	286	439	447	325	500	500	447	453	350	296	334	313	300	279	137	246	252		251	482	500	447	488	419	389	419	396
20131207	20	393	388	420	407	378	403	464	308	319	455	471	365	500	500	438	500	380	274	317	294	272	268	173	242	238		257	477	484	465	450	412	388	414	377
20131207	21	395	358	375	379	363	421	467	298	345	452	472	386	500	500	455	480	353	234	303	241	271	346	197	254	252		261	500	500	461	421	401	383	396	424
20131207	22	386	346	351	368	371	466	439	300	349	408	410	370	500	484	422	447	351	223	303	199	264	326	209	254	256		263	500	500	457	410	370	372	377	431
20131207	23	399	357	425	370	413	419	401	331	353	429	397	362	497	500	406	415	362	224	315	198	253	300	230	246	267		262	500	500	455	428	375	415	376	396
20131208	0	399	359	413	374	420	422	328	354	352	431	381	349	451	457	410	374	361	274	329	205	265	295	250	246	285	200	256	487	500	449	426	380	387	379	417
20131208	1	397	381	343	393	368	394	311	362	365	377	394	348	401	418	393	355	325	331	307	224	278	280	253	254	294		251	424	500	435	457	389	336	387	379
20131208	2	383	367	351	391	335	385	326	346	338	366	367	335	361	421	383	349	312	330	294	306	274	282	251	242	289		253	381	500	409	429	369	322	389	340
20131208	3	388	378	365	384	350	365	339	344	332	347	361	319	350	400	384	350	299	375	280	227	265	279	247	263	263	200	261	353	500	431	439	372	353	379	309
20131208	4	401	377	364	391	323	372	357	313	348	349	321	321	340	402	360	382	355	345	285	229	264	274	252	273	256		284	307	500	427	450	380	335	390	311
20131208	5	383	387	333	365	337	407	362	318	334	359	317	309	323	374	368	341	343	325	265	243	249	246	258	276	241		288	290	500	386	429	375	313	373	361
20131208	6	395	383	345	367	334	407	362	290	322	358	301	287	313	376	369	359	351	312	257	206	274	244	217	274	202	220	276	348	500	374	438	378	333	343	344
20131208	7	390	375	365	373	345	372	357	285	297	362	290	283	284	368	370	332	345	265	246	231	284	244	220	255	173		266	357	482	339	428	369	351	346	333
20131208	8	363	356	347	371	331	361	343	332	285	369	280	286	308	346	369	357	303	200	239	259	274	239	246	218	146		253	400	458	339	400	378	323	350	318
20131208	9	312	343	307	336	316	331	344	342	332	349	304	300	338	368	369	374	279	162	256	342	277	238	222	144	125	215	251	416	456	379	383	341	305	353	309
20131208	10	331	320	296	322	300	339	336	403	297	301	348	329		388	384	358	259	129	278	414	298	242	227	62	105		267	449	472	393	358	313	294	319	328
20131208	11	307	290	272	293	286	337	322	435	320	299	373	324	403	500	395	358	259	129	278	414	298	242	227	62	105	227	267	449	472	393	358	313	294	319	328
20131208	12	255	215	216	236	262	319	331	369	296	367	351	261	419	500	344	338	253	38	340	476	303	242	266	40	62		286	448	500	446	251	236	215	254	294
20131208	13	196	160	172	181	189	219	253	203	241	395	358	243	433	448	265	284	226	33	282	500	262	216	230	39	29		318	395	500	413	202	170	186	188	223
20131208	14	210	136	161	146	157	177	190	49	74	398	366	258	409	444	500	214	182	18	249	499	244	204	200	30	20	205	298	331	494	410	164	143	164	217	163
20131208	15	129	78	46	59	21	101	22	13	12	285	321	140	419	434	485	159	137	23	25	419	226	151	107	13	14		286	156	500	410	84	83	38	354	84
20131208	16	72	12	21	14	16	18	18	12	10	25	46	18	420	448	129	57	133	17	11	240	222	132	17	12	17	159	84	453	467	379	6	20	11	21	13
20131208	17	52	12	15	10	12	8	12	9	10	17	12	12	337	246	14	20	139	18	14	77	191	138	11	12	16	142	67	325	436	401	3	9	10	3	8
20131208	18	35	7	17	10	12	13	14	12	8	19	42	20	34	26	13	21	44	19	10	61	15	104	12	11	10		59	32	457	396	19	9	14	16	11
20131208	19	10	15	14	13	15	11	14	7	3	11	52	14	15	21	14	20	12	15	11	68	3	21	12	5	13	15	55	28	142	229	25	15	15	17	11
20131208	20	7	10	12	11	10	7	11	6	3	5	9	14	15	21	14	20	12	15	11	68	3	21	12	5	13	15	55	28	142	229	25	15	15	17	11
20131208	21	6	11	11	8	10	3	12	6	6	3	10	8	12	15	15	16	3	14	13	23	8	11	5	7	8		10	12	16	7	16	3	3	3	6
20131208	22	22	12	9	7	8	3	8	7	6	5	10	9	8	9	12	15	5	9	11	3	7	3	10	6	9		6	18	14	10	13	3	3	3	11
20131208	23	7	12	9	10	3	7	9	3	3	3	11	5	5	3	10	6	9	3	9	13	8	3	13	3	15	5	3	11	3	3	3	3	3	6	8
20131209	0	3	10	3	11	3	6	10	8	3	3	7	4	5	10	7	3	7	3	9	3	9	3	6	3	7		8	6	7	6	13	9	10	10	7
20131209	1	3	3	5	11	3	3	3	3	3	7	7	6	3	4	5	3	8	5	3	8	10	6	8	3	6		8	4	3	3	7	7	8	11	5
20131209	2	3	3	3	6	3	6	8	3	5	7	9	9	5	7	4	5	9	3	9	10	13	4	5	3	7		7	12	6	4	6	5	8	11	5
20131209	3	16	3	3	9	10	5	10	8	3	9	8	4	3	5	4	6	10	9	6	4	14	4	7	3	11		6	13	7	3	13	6	7	7	6
20131209	4	12	8	8	8	9	6	9	7	3	8	3	4	3	4	9	4	14	9	5	8	6	8	9	3	8		3	9	7	3	7	5	8	7	3
20131209	5	10	7	5	6	7	7	8	3	5	9	6	6	3	9	6	3	8	8	5	8	16	5	5	6	11		3	13	5	5	7	5	9	6	3
20131209	6	12	7	9	3	6	9	3	3	6	4	6	3	9	8	8	12	8	5	5	8	8	12	4	4	6		4	10	5	5	7	3	6	4	7
20131209	7	3	3	3	8	10	4	3	10	3	3	8	4	7	6	8	14	8	9	7	10	9	9	5	3	3		3	18	8	4	14	3	9	8	3
20131209	8	16	11	7	9	3	9	3	8	7	3	9	5	9	9	7	9	3	11	3	11	20	16	8	3	8		3	16	13	18	9	3	10	12	8
20131209	9	15	10	14	11	3	14	12	7	8	3	7	4	12	3	3	3	8	7	8	12	21	18	11	6	9		5	11	18	19	3	3	3	10	3
20131209	10	8	12	12	8	3	4	14	7	6	3	14	3	6	13	3	10	14	6	7	17	11	8	10	3	11		3	16	19	54	3	6	8	3	3
20131209	11	20	6	12	4	3	15	13	9	3	4	3	9	7	3	3		5	12	3	3	9	12	8	8	9		3	11	4	20	4	12	9	11	7
20131209	12	7	8	12	11	9	3	3	7	45	15		3	3	12	3	9	6	8	6	3	3	6	9	7	14		3	3	12	13	3	3	3	11	8
20131209	13	20	15	3	12	3	11	8	7	8	14		12	7	16	10	3	6	14	5	9	3	6	10	14	13		5	11	8	16	19	13	10	10	3
20131209	14	5	3	17	11	10	3	9	5	4	9	3	11	3	6	11	3	5	8	9	3	15	5	13	10	13		3		12	17	17	9	13	3	3
20131209	15	23	9	13	7	3	3	3	9	10	6	16	6	5	3	11	9	11	13	5	3	4	3	12	6	11		3	16	3	24	18	9	6	8	3
20131209	16	16	9	7	6		9	3	6	3	3	5		18	3	9	11	3	16	3	3	18	3	4	12	10		3	12	26	30	17	3	9	8	6
20131209	17	16	8	10	3	3	3	3	6	9	3	19	9	31	3	3	5	3	18	6	9	8	9	5	9	12		3	17	11	32	14	3	12		6
20131209	18	8	5	14	7	10	3	12	3	3	13	17	13	43	23	3	7	9	26	3	13	27	3	6	3	13		14	34	17	53	18	3	4		7
20131209	19	12	14	20	15	13	12	18	24	9	19	49	23	53	66	8	20	13	28	16	27	43	6	20	21	19		27	43	33	71	20	6	24	15	13
20131209	20	17	27	31	18	20	10	36	52	16	37	65	31	69	82	42	58	14	19	54	56	79	3	22	15	20		49	74	43	97	14	15	23	25	18
20131209	21	20	22	22	35	29	40	36	79	16	69	70	54	73	75	85	67	10	22	77	46	62	9	16	9	20		24	57	38	128	25	34	21	58	56
20131209	22	25	21	17	51	41	55	41	108	13	77	78	68	91	92	80	77	12	14	45	31	77	10	24	16	17		29	70	53	125	16	44	16	69	73
20131209	23	34	22	31	36	21	51	57	97	7	86	76	57	156	107	81	88	8	17	42	34	43	15	31	22	20		23	77	77	120	15	36	26	73	71
20131210	0	24	31	21	47	14	56	61	94	13	132	81	52	120	198	76	120	9	28	46	96	24	14	50	27	25		11	91	67	130	27	61	21	66	82
20131210	1		28	23	62	20	47	70	93	24	141	67	45	104	183	102	117	19	127	50	95	25	3	47	28	26		3	116	89	145	35	68	26		79
20131210	2	26	49	25	99	19	45	55	118	20	105	46	44	76	129	151	96	23	83	48	110	33	8	48	30	26	6	4	94	98	171	30	62	26		74
20131210	3	29	49	26	56	27	51	53	88	18	80	35	40	79	144	159	202	30	72	29	112	28	7	65	28	23		9	97	93	177	35	48	20	118	71
20131210	4	28	42	32	27	44	50	49	98	10	64	32	23	61	173	137	176	26	48	21	86	17	4	81	21	33		8	114	88	175	40	35	34	78	61
20131210	5	40	25	28	17	28	48	54	75	15	38	30	16	44	174	171	110	19	35	18	79	14	7	57	25	28		3	109	88	148	43	25	30	33	47
20131210	6	30	25	14	23	34	46	49	75	19	38	26	16	41	159	135	95	13	59	21	42	13	20	46	21	31		3	104	92	138	35	33	22		54
20131210	7	29	26	18	26	25	38	52	76	18	52	32	29	38	169	84	96	12	32	21	28	23	30	28	16	34		3	93	79	142	30	14	25		52
20131210	8	21	27	22	21	15	36	56	73	12	64		42	58	158	87	124	10	40	24	21	26	25	26	24	41		3	164	98	147	22	26	16		57
20131210	9	19	37	20	23	21	31	52	81		60	46	39	63	134	148	169	25	66	29	31	34	30	63	27	34		5	214	140	137	39	32	10		59
20131210	10	23	38	24	56	31	43	51	82		84	60	34	76	192	133	125	36	117	32	54	55	48	70	32	32		50	216	182	129	28	29	13		37
20131210	11	16	25	34	62	47	47	56	61		87	65	39	83	172		62	50	90	34	78	65	36	66	42	30	14	39	217		182	19	28	34		63
20131210	12	34	28	35	51	25	38	31	17		39	45	29	84	134		64	55	18	23	94	65	37	8	18	15		66	217		159	23	36	27		37
20131210	13	15	12	20	15	13	11	18	9		22	12	12	73	45	16	21	49	17	8	83	34	39	3	12	14		58	198	133	153	25	12	10		8
20131210	14	15	8	20	11	10	12	15	7		10	10	7	34	15	13	6	12	9	7	83	5	14	7	9	10		55	54	189	163	21	10	12		9
20131210	15	12	6	9	7	11	3	13	9		11	9	10	26	8	9	19	11	11	9	76	10	9	6	4	3	3	20	10	73	3		3	11		3
20131210	16	14	7	12	5	7	6	14	7		5	25	8	20	17	9	9	7	5	8	12	7	9	7	5	3	5	3	8		6		9	8		7
20131210	17	7	7	9	5	7	8	12	5	7		10	10	25	11	8	9	6	8	5	7	12	3	7	4	4	4	7	7	25	3	9	7	8		8
20131210	18	11	6	5	7	8	6	12	6		6	16	7	13	13	10	15	48	10	10		7	6	13	8	9		10	12	22	6	12	5	7		3
20131210	19	13	7	8	9	11	7	7	7		7	8	8	12	9	7	9	13	5	5	10	6	4	10	7	6		13	11	17	7	13	10	12		12
20131210	20	13	4	7	7	11	7	10	7	3	11	7	10	16	8	10	8	8	9	7	7	10	11	7	3	9		10	12	24	4	13	10	11		7
20131210	21	7	4	10	8	11	9	13	7		15	7	12	10	10	14	6	3	10	4	8	11	7	11	3	12		4	7	14	6	11	7	8		7
20131210	22	7	6	8	8	7	7	11	7		11	12	8		7	6	3	4	16	9	8	6	8	9	6	9		10	7	12	3	10	6	8		7
20131210	23	9	9	3	10	7	9	8	3		6	11	11	6	11	6	3	4	12	3	6	5	5	13	10	13		7	8	8	3	12	4	6		8
20131211	0	6	5	5	8	8	4	9	5		8	11	10	4	7	5	6	3	13	8	4	6	6	9	6	7		15	6	9	5	7	5	8		9
20131211	1	3	3	3	6	7	3	9	4		8	19	6	6	13	9	5	3	10	7	8	6	4	7	7	8		6	5		3	9	3	5		6
20131211	2	3	3	6	7	3	3	3	3		6	17	6	15	8	4	16	4	13	8	3	3	8	6	3	6		3	13	7	6	6	7	6		4
20131211	3	6	3	3	6	7	6	3	7		6	61	3	3	3	5	19	3	11	6	3	11	5	5	4	10		10	6	6	3	8	7	3		3
20131211	4	3	8	3	7	6	8	3	3		3	23	5		3	6	10	3	9	5	8	3	11	3	5	12		9	9	9	3	16	6	7		10
20131211	5	5	4	7	3	7	4	5	3		3	10	3	8	9	7	5	3	5	3	5	9	9	6	3	6		4	9	11	3	8	4	6		8
20131211	6	5	5	9	10	10	6	9	4		5	30	5	10	6	5	10	6	10	4	8	16	16	3	3	5		11	15	18	9	9	3	3		8
20131211	7	3	9	7	8	3	8	4	6		9	25	7	17	3	9	9	7	7	8	8	30	9	15	3	10		3	15	23	15	14	3	3		13
20131211	8	8	5	6	15	21	10	17	9		16	28	11	19	14	17	12	14	22	13	10	35	32	29	6	13		10	22	33	30	14	15	5		41
20131211	9	5	26	23	31	22	3	20	36		32	27	15	36	28	31	56	15	21	14	27	48	43	30	4	13		3	29	34	48	27	28	16		20
20131211	10	25	33	24	41	19	15	26	22		30	45	31	40	40	23	48	28	36	16	38	36	38	23	7	18		5	22	64	79	39	37	14		15
20131211	11	31	30	34	36	29	27	21	21		33	55	39	40	35	15	20	25	20	22	42	42	20	17	3	23		3	16	44	70	38	24	18		20
20131211	12	30	33	25	31	22	26	29	15		42	42	34	48	32	21		18	10	31	28		29	3	5	11		13	16	52	61	40	30	27		20
20131211	13	28	28	29	35	21	33	32	5		41	48	44	55	40	34	25	18	11	25	44		26	7	7	8		27	16	34	58	34	28	20	42	27
20131211	14	15	28	31	34	22	39	36	10	27	31	42	40	49	40	37	23	10	11	38	50	8	23	9	8	8		18	15	28	57	29	20	23	39	28
20131211	15	27	26	36	38	18	28	38	6		32	37	36	42	18	36	33	10	13	36	21	49	21	5	12	18		21		21	33	28	29	31	43	19
20131211	16	35	40	37	33	34	24	35	9		30	40	36	40	24	35	37	11	9	35	24	17	17	3	3	8		18	12	24	24	40	31	36	36	23
20131211	17	32	27	35	31	41	28	45	8		37	48	50	40	25	29	53	10	9	47	21	35	25	5	3	6		19	33	33		42	28	40	32	28
20131211	18	36	28	48	33	36	29	49	37		41	55	68	57	52	40	65	16	9	73	26	30	16	6	6	9		23	45	38		44	35	49	43	29
20131211	19	58	28	41	36	45	40	64	73		45	93	86	183	115	50	140	26	18	84	43	44	7	14	8	11		29	169	64	65	49	47	48	60	34
20131211	20	51	40	40	63	47	80	93	86		68	48	84	175	150	51	215	41	27	82	37	23	9	15	3	8		20	157	81	87	61	70	47	68	112
20131211	21	46	54	43	55	34	92	78	75		127	62	84	105	189	93	155	25	41	62	83	20	6	10	22	10		8	186	95	117	48	75	38	82	110
20131211	22	50	43	30	40	27	82	49	81	28	121	83	77	118	215	100	162	27	35	50	51	22	6	28	34	9		5	113	85	153	49	55	27	73	120
20131211	23	49	43	37	54	36	79	55	88		134	63	63	100	143	85	130	25	42	48	39	24	17	37	44	17		3	155	111	126	49	52	30	57	113
20131212	0	47	44	36	54	39	58	61	110		157	47	52	77	130	88	102	36	54	41	63	25	35	50	50	22		14	154	122	123	48	64	42	79	77
20131212	1	52	46	39	62	43	58	69	114		119	55	54	76	98	100	88	40	67	44	64	19	29	47	41	18	7	12	132	113	116	47	54	45	125	60
20131212	2	40	39	47	47	39	49	64	92		123	48	43	77	103	93	121	29	48	47	83	18	34	32	34	11		3	86	105	121	46	51	45	87	76
20131212	3	44	39	49	61	38	56	54	79		61	49	40	70	106	82	118	21	28	42	70	39	19	16	27	3		27	108	108	129	46	47	50	102	71
20131212	4	30	41	43	77	33	41	63	35	10	63	46	45	58	87	82	72	29	25	39	47	29	22	6	23	7	13	55	106	105	108	42	60	42	106	46
20131212	5	15	26	27	24	6	10	24	6	10	66	26	40	70	90	90	55	18	7	42	44	21	8	6	5	5	12	16	91	105	102	24	21	13	62	22
20131212	6	6	7	10	8	24	22	10	6		12	11	8	56	18	20	54	11	7	15	64	19	5	3	3	4		10	31	114	86	8	8	9	19	34
20131212	7	13	18	20	11	27	19	11	4	4	6	11	5	11	13	22	44	10	3	4	10	4	5	3	3	5		6	36	70		20	12	13	15	25
20131212	8	12	10	12	13	13	12	9	3	3	6	6	5	14	8	22	18	4	3	6	21	8	6	7	3	9		3	36	14	38	12	7	7	15	13
20131212	9	3	9		6	3	3	6	5	3	7	5	3	13	4	13	12	5	7	8	7	10	8	14	3	10		9	14	21		14	6	5	8	9
20131212	10	11	11	6	5	3	6	8	4		10	6	5	20	11	9	7	9	6	10	10	6	6	6	8	8		8	9	15	9	11	5	7	11	7
20131212	11	3	8	8	8	6	12	8	7	6	8	10	9	17	7	7	11	3	7	10	6	4	3	3	8	6		5	8	15		14	10	10	10	8
20131212	12	6	3	11	10	7	7	10	8	6	6	14	6	27	8	10	4	3	3	6	6	7	5	7	9	9		3	10	11	5	10	7	8	6	7
20131212	13	10	7	15	11	6	3	12	6		3	41	9	16	9	9	7	4	3	7	13	5	5	6	7	14		11	6	9	4	16	7	3	11	4
20131212	14	9	6	15	9	8	6	9	6	5	9	3	7	14	4	4	9	3	8	9	10	5	3	4	3	18		8	6	8	8	15	6	8	7	7
20131212	15	8	6		4	7	10	11	11		8	10	23	14	7	5	6	5	3	9	7	3	4	5	3	7		3	6	15	5	18	9	8	9	11
20131212	16	8	7		8	8	3	7	5	7	9	6	8	16	10	10	9	6	5	5	4	3	6	6	6	8	3	3	7	13	10	18	8	7	6	5
20131212	17	17	6	5	8	3	5	10	4		9	8	6	11	6	13	7	6	9	9	4	7	9	8	5	4		8	8	14	13	18	8	11	6	4
20131212	18	8	11	11	9	8	3	11	6		9	10	6	15	11	17	7	8	15	8	9	7	15	7		6	7	10	17	18	13	16	9	10	9	13
20131212	19	8	9	9	10	7	5	19	9	13	8	17	12	16	12	18	22	10	8	9	20	15	13	5	3	6		10	25	17	16	14	9	8	16	15
20131212	20	9	8	14	16	17	12	22	8	11	12	23	16	19	24	22	46	11	13	10	17	16	9	3	4	5		5	20	18	17	17	12	19	16	29
20131212	21	8	16	12	12	19	9	20	6	5	10	21	21	15	28	27	39	11	11	9	11	6	8	3	7	7		6	24	17		10	18	16	22	12
20131212	22	16	25	10	22	21	13	20	8	3	15	16	20	19	34	27	42	12	25	6	7	15	14	3	9	4		6	34	18	60	21	17	22	19	26
20131212	23	18	17	11	19	16	31	27	4	3	17	47	17	71	40	23	57	16	19	6	8	26	29	7	21	11	4	5	30	21	73	23	24	12	21	51
20131213	0	15	35	61	49	11	35	41	14		57	53	36	68	44	33	74	24	13	15	9	30	26	10	12	17		3	22	30	97	44	45	16	69	44
20131213	1	38	40	51	38	22	41	58	11	3	51	61	50	81	39	52	37	30	8	24	14	29	20	9	8	16		10	31	63		49	38	50	64	40
20131213	2	45	45	64	51	43	43	60	15		64	69	50	74	75	48	43	52	20	45	21	29	31	13	14	15		13	41	78		54	49	43	68	39
20131213	3	42	46	49	49	38	44	52	13	6	61	65	41	72	72	57	56	61	36	64	23	36	29	12	11	16		18	45	61		50	50	46	69	39
20131213	4	37	46	49	49	35	35	51	5	9	58	62	43	75	84	69	61	53	25	36	38	29	25	8	13	7		35	46	61		46	47	38	37	42
20131213	5	38	42	51	50	39	32	46	3	7	66	57	51	76	79	74	68	44	23	37	37	23	19	13	8	13		43	50	51		48	48	42	74	37
20131213	6	48	56	39	57	38	45	41	5	10	65	56	45	76	76	66	65	37	17	41	36	48	15	21	8	8		45	64	138		58	54	32	76	53
20131213	7	44	50	43	52	45	46	45	3	11	64	46	41	87	77	59	59	27	10	46	15	24	24	21	10	8		24	74	90		54	49	41	78	79
20131213	8	25	41	51	43	51	75	52	4		76	50	45	65	79	56	96	12	20	56	31	42	19	13	7	9		13	71	99		50	50	44	86	102
20131213	9	34	58	42	56	46	67	59	10	45	57	61	53	78	102	57	190	38	16	83	33	41	30	13	8	5		11	104	104		61	70	36	93	131
20131213	10	35	39		61	18	96	45	41		81	69	70	128	71	74	37	35	7	61	30	45	26	15	9	9	6	16	95	121		41	68	20	81	94
20131213	11	54	71	51	66	38	32	60	28	47	91	86	65	121		56	13	21	68	42	23	47	14	27	10	9		21	47	102		69	72	37	63	23
20131213	12	78	68	78	80	62	62	71	39	55	79	95	67	106	50	57	21	18	43	41	3	22	7	11	27	10		5		62	87	87	72	58	77	41
20131213	13	57	53	55	58	48	67	54	38	42	71	87	71	106	50	49	58	21	48	30	3	13	6	9	28	14		3	19	66	54	65	51	48	65	53
20131213	14	55	47	56	56	45	41	53	36		61	88	73	83	73	57	40	46	39	57	7	22	5	12	39	14	6	5	33	84	80	55	44	48	52	41
20131213	15	47	58	61	70	45	46	65	55	69	76	60	59	88	86	77	52	56	56	57	16	27	8	13	52	9		28		80		69	66	52	75	38
20131213	16	77	80	74	77	62	74	61	54	50	73	85	64	135	100	83	56	45	63	71	30	28	10	13	55	13	6	51	56	53		86	82	68	89	58
20131213	17	83	84	82	93	69	80	84	57		100	106	88	155	117	109	78	48	68	86	60	39	6	20	61	32		62	58	56		97	91	72	99	66
20131213	18	108	100	110	120	88	98	105	81	87	132	128	114		137	129	118	61	74	110	42	45	15	41	61	55		60	71	63	127	132	116	100	127	79
20131213	19	122	111	117	134	97	103	120	137		138	148	128		112	150	284	33	80	117	67	41	56	66	68	57		67	132	91	259	142	128	109	135	91
20131213	20	140	107	113	120	61	109	109	103	94	135	156	145	136	106	155	279	33	75	112	77	68	82	55	57	56	11	43	219	106	201	133	139	92	139	104
20131213	21	73	101	66	98	46	55	67	114	90	153	133	102	221	103	132	306	40	75	91	81	59	64	32	55	47		48	255	111	219	101	111	44	128	38
20131213	22	59	57	53	61	46	39	73	131	62	103	131	86	152	132	186	203	35	97	85	119	69	64	53	60	23		48	273	152	219	60	60	33	80	37
20131213	23	58	55	52	55	44	42	83	113	41	68	111	107	113	186	150	170	68	77	83	100	76	53	61	57	15	21	42	308	166	196	53	60	49	62	54
20131214	0	44	50	53	50	59	60	83	173	51	74	98	88	122	221	152	169	96	64	83	79	68	41	90	56	25		42	405	136	180	42	55	51	58	77
20131214	1	47	44	49	43	101	93	105	147		100	87	88	142	240	97	80	44	39	79	66	59	33	71	33	21		45	339	188		52	49	50	48	100
20131214	2	95	43	65	52	127	110	133	135		128	75	84	134	183	88	62	28	75	82	98	57	29	12	14	18		41	226	163	166	69	53	91	46	116
20131214	3	80	61	97	78	123	86	124	112	49	100	73	72	122	153	100	63	18	89	83	29	51	37	17	11	13	12	32	186	185	151	109	91	106	82	67
20131214	4	39	66	66	58	55	44	119	111	30	61	63	59	100	118	59	42	12	15	83	44	42	21	11	10	13	9	21	105	194		71	65	77	33	47
20131214	5	22	42	40	31	54	38	89	99	24	45	49	52	91	97	33	30	6	15	77	63	42	7	8	11	14		17	89	195	145	49	41	48	3	56
20131214	6	24	19	37	26	37	36	62	82	20	36	45	57	98	91	29	28	9	10	72	38	28	3	7	9	16		17	56	198		37	26	42	3	45
20131214	7	21	16	28	22	32	36	31	84		25	45	35	92	37	34	32	4	13	69	51	21	3	12	6	11		14	39	192		23	16	23	3	43
20131214	8	17	18	24	15	27	27	14	62		18	32	17	99	20	26	48	7	11	60	68	22	8	20	7	18	13	12	45	124		26	15	12	3	39
20131214	9	17	20	19	19	25	37	19	37		12	25	22	105	19	27	50	12	13	59	65	61	11	41	10	21		3	44	57		25	18	17	8	31
20131214	10	14	10	23	12	32	21	24	40	32	15	33	31	87	19	24	53	11	13	41	81	37	7	33	12	26	14	8	32	51		24	16	15	29	30
20131214	11	16	17	32	21	30	18	29	41	20	23	57	31	98	17	26	25	18	16	14	63	19	7	19	9	27	10	18	25	40	160	19	15	29	41	24
20131214	12	20	20	35	18	21	22	25	38	23	22	77	28	97	20	29	20	12	15	15	20	17	3	11	12	31		4	17	41	86	30	18	22	20	22
20131214	13	16	26	31	25	19	26	30	37	21	33	108	38	108	40	18	16	4	13	73	58	7	7	8	15	15		9	13	51	85	23	21	23	28	19
20131214	14	19	19	29	33	21	21	32	28	25	47	111	74	111	60	26	13	3	10	90	3	12	3	14	15	12		11	13	76	85	24	24	22	30	14
20131214	15	23	31	39	27	22	18	52	35	48	105	119	107	109	107	27	13	6	17	97	3	16	3	11	11	13		3	17	71	79	34	34	32	55	19
20131214	16	54	85	100	109	38	28	116	72	101	121	128	117	103	105	81	4	8	18	114	4	14	3	14	8	12		15	30	80	83	102	100	78	115	24
20131214	17	120	113	114	114	95	106	129	105	116	120	107	118	96	93	112	32	15	34	130	8	19	8	18	29	12	3	3	37	91	88	128	112	118	116	76
20131214	18	118	102	113	110	110	115	126	134	120	115	120	114	112	115	114	101	16	42	162	15	27	12	34	34	20		21	85	94	110	126	109	112	115	101
20131214	19	130	97	112	119	111	112	117	149	111	126	145	128	126	155	135	129	20	56	142	87	40	25	34	53	28	6	19	165	109	135	121	106	104	121	99
20131214	20	123	98	116	116	79	108	120	92	101	131	157	141	139	161	161	129	34	115	154	37	53	64	26	46	19		24	182	105	171	120	112	111	126	85
20131214	21	100	105	108	121	38	49	120	89		142	161	137	163	153	138	134	28	100	159	26	39	41	24	37	18		29	170	111	185	130	120	61	124	57
20131214	22	40	106	58	123	43	66	114	160	97	147	174	134	176	140	145	155	25	121	159	69	51	32	33	36	28		18	176	132	192	125	124	28	125	68
20131214	23	50	110	53	128	40	55	125	154	63	178	135	137	184	151	161	204	53	94	130	80	45	14	34	52	22		15	195	120	200	129	131	43	135	69
20131215	0	49	115	47	123	34	54	135	158		203	130	123	206	208	177	245	41	90	107	67	47	23	38	49	37	20	31	190	125		83	137	37	144	81
20131215	1	36	107	30	50	39	55	113	169	29	176	118	104	204	208	166	188	27	63	102	85	35	34	37	37	39	16	43	220	134	243	46	78	29	100	56
20131215	2	33	55	36	32	85	41	139	164	20	170	86	101	159	219	154	97	18	95	95	105	43	19	67	42	39	18	34	216	170	229	27	39	57	35	54
20131215	3	51	39	84	46	109	39	146	147	24	88	88	80	138	224	85	84	25	119	78	71	36	12	78	27	29	12	15	256	168	203	34	41	109	38	64
20131215	4	34	29	69	46	51	47	118	140	16	77	71	51	92	231	63	62		87	63	47	21	3	81	27	28	7	23	267	159		50	42	54	38	54
20131215	5	14	20	17	29	23	21	82	139	12	44	43	38	73	103	39	42	10	75	55	46	20	6	73	14	31	7	22	217	164		23	22	18	35	36
20131215	6	15	13	19	23	14	8	50	127	9	15	63	56	43	43	43	31	5	72	63	36	17	3	77	14	23	10	11	152	163		22	11	14	15	29
20131215	7	7	7	11	15	9	13	39	121	24	21	58	53	48	37	34	36	6	135	64	34	24	7	50	29	26	13	9	156	168		14	16	13	27	27
20131215	8	17	17	18	15	15	19	29	112		56	70	36	60	31	28	36	7	126	64	32	30	5	61	38	25	8	3	130	199		24	16	7	21	27
20131215	9	13	18	18	14	17	22	32	111	15	61	60	40	78	63	23	43	8	100	65	45	41	6	105	69	20	6	15	125	243		22	20	13	22	29
20131215	10	16	18	18	20	20	19	20	93	17	30	90	26	128	38	40	45	15	79	68	51	41	3	106	87	26		25	150	185	158	21	18	14	24	27
20131215	11	18	16	24	13	32	28	15	58	29	20	49	27	90	25	31	38	11	78	44	69	25	3	83	83	38	14	115	94	63	65	20	10	16	22	50
20131215	12	13	7	21	19	31	34	13	58	21	11	45	29	50	19	28	56	8	68	19	95	27	3	79	65	32		108	63	50	43	13	7	16	21	28
20131215	13	26	20	28	23	27	31	37	55	44	14	39	30	35	16	32	52	7	68	33	67	13	3	53	65	32		72	64	38	26	29	11	17	22	30
20131215	14	38	26	35	33	31	37	41	53		30	31	23	33	36	35	56	12	61	40	59	13	5	36	64	18		71	63	31	17	36	25	30	25
20131215	15	38	36	43	30	39	39	42	52	40	32	28	32	39	33	40	68		44	40	38	16	4	35	66	20	4	46	72	20	37	36	33	39	37	30
20131215	16	41	39	38	40	36	54	42	44	40	37	34	39	44	40	44	94	27	40	34	34	46	9	30	54	18	8	50	85	46	52	46	40	30	46	39
20131215	17	46	43	41	48	43	45	46	50	38	47	47	50	55	45	52	64	44	45	39	40	22	15	28	50	28		58	95	71	75	53	47	49	56	50
20131215	18	57	46	55	64	47	57	54	69		70	73	77	81	59	55	98	79	59	54	61	34	34	48	45	61	16	69	147	119	99	71	66	45	69	66
20131215	19	72	61	56	70	55	52	60	82	47	98	109	89	105	78	83	124	102	63	83	86	90	52	59	93	51	31	84	145	107	131	85	82	53	81	62
20131215	20	84	72	78	88	59	75	83	140		101	120	110	145	135	134	334	106	57	96	109	60	135	86	66	54	33	110	204	112	173	91	80	66	91	58
20131215	21	99	81	82	99	70	78	101	134	66	112	135	122	141	137	141	344	169	58	77	134	62	99	66	54	47	47	111	208	96	205	100	88	80	101	70
20131215	22	102	81	80	102	82	78	117	159	64	111	139	132	192	125	140	320	201	67	66	106	62	86	70	81	58	22	103	227	112	215	95	103	74	110	153
20131215	23	84	83	86	101	136	165	118	130	65	142	142	119	215	167	127	333	183	63	58	92	55	84	65	92	63		106	300	151	246	102	109	100	103	175
20131216	0	116	87	121	100	186	222	132	119	62	179	105	107	274	288	143	316	100	64	56	91	50	99	78	63	51		78	299	163	235	102	126	124	119	237
20131216	1	173	96	140	121	180	307	154	133		156	85	95	239	249	160	356	73	66	64	106	48	82	84	81	51		76	344	171		133	135	170	159	308
20131216	2	244	141	182	163	183	316	135	153		144	96	87	163	239	205	363	82	54	58	87	50	52	104	68	48		73	407	177	189	188	146	195	251	280
20131216	3	260	158	199	171	165	255	138	147		149	84	78	135	266	227	302	73	55	57	77	42	47	86	51	60		93	387	168	147	191	196	177	230	233
20131216	4	189	183	167	181	119	187	118	136		151	77	74	97	231	314	294	67	54	56	70	46	51	99	51	54		79	394	155	128	207	195	134	202	217
20131216	5	94	169	111	114	113	146	125	159		156	74	70	89	206	307	229	58	53	52	69	51	44	89	47	55		77	401	163		104	119	88	153	165
20131216	6	58	93	91	84	112	73	105	159		147	65	63	92	247	216	175	55	61	55	70	51	40	79	47	53		71	372	153		76	69	91	81	146
20131216	7	39	67	79	74	106	53	102	148		104	77	67	93	305	166	171	49	75	56	67	56	43	85	75	56		70	358	167		60	58	85	79	97
20131216	8	51	58	92	66	107	68	140	156		107	84	89	96	232	119	181	45	82	52	81	59	47	97	69	63		72	368	165	108	47	50	84	63	89
20131216	9	53	50	86	62	50	76	128	152		121	102	96	113	272	125		40	130	60	105	78	52	92	99	76		76	382	188		61	48	75	70	83
20131216	10		58		52	50	74	112	149		87	114	90	151	212	120	215	73	149	71	92	82	50	194	102	73	42	85	373	229		75	60	55	54	99
20131216	11		64	64	59	57		85	101		85	110	85	164	211	142	172	53	149	68	115	71	48	124	86	80		129	299	268	172	80		56	60	102
20131216	12	57	79	69	75	69		87	104	92	77	100	90	154	192	181		61	150	84	134	63	44	109	100	84		135	278	245		96	51	68	76	99
20131216	13	110	94	79		87	83	86	110		85	113	86	141	171	186		85		92	205	61	40	113	114	87		145	248	230	122	106	99	80	95	109
20131216	14	129	114	98	116	91	126	107	113		101	109	92	126	164	188	134	105	60	98	138	85	63	107	148	86		145	250	227	151	125	109	93	110	126
20131216	15	145	117	117	123	104	146	113			120	119		132	186	193	199	109	132	102	144	119	76	93	137	97		152	240	197	149	133	120	115	130	137
20131216	16	147	146	129	134	112	151	120			128	131	83	150	211	203	200	119	110	119	140	207	88	97	113	102		179	239	191	165	146	135	117	174	146
20131216	17	163	162	166	143	130	164	123	72		140	138	118	159	226	216	211	152	105	124	149	182	102	101	107	90		172	252	201	180	173	168	119	180	161
20131216	18	188	181	142	178	145	169	138	118		167	129	123	175	256	231	249	176	123	133	159	124	153	119	106	104		154	293	272	208	181	195	133	205	177
20131216	19	185	199	160	202	150	188	173	122		232	162	140	206	264	270	338	192	145	147	204	180	173	123	117	98		142	359	258	206	188	215	155	219	204
20131216	20	194	196	180	182	155	213	191	198		256	202	162	290	299	263	334	182	137	170	249	155	166	221	123	118		144	348	288	238	190	201	150	223	213
20131216	21	209	192	152	151	162	212	205	187		229	197	151	269	292	263	354	166	160	155	227	138	170	215	154	102		126	351	273	213	198	209	147	223	243
20131216	22	227	213	171	170	191	255	208	212		266	222	156	273	300	258	376	142	145	152	361	137	127	159	140	104		146	354	269	203	251	233	160	260	284
20131216	23	256	221	255	231	210	309	209	226		260	199	166	331	292	264	285	171	141	158	327	144	118	143	128	96		133	334	257	248	245	229	189	237	290
20131217	0	252	214	249	223	219	267	207	219		247	202	161	313	289	282	281	188	137	159	371	155	148	143	144	92		149	326	267	253	258	222	203	227	259
20131217	1	253	222	235	224	235	255	227	244		211	189	144	243	269	285	300	168	139	147	369	132	145	107	131	58		156	326	290	263	261	235	204	217	244
20131217	2	248	232	232	232	235	251	234	230		211	171	136	197	242	283	262	212	140	135	290	124	143	62	124	38	103	149	306	316	221	253	235	223	233	234
20131217	3	206	222	236	232	187	246	215	229		238	148	149	157	262	258	244	152	131	129	262	130	125	109	121	25	76	153	248	294	188	226	221	197	229	232
20131217	4	169	182	181	202	168	183	183	221		237	150	155	159	234	233	221	123	125	131	268	130	96		118	38		146	229	263	141	200	187	144	211	181
20131217	5	184	186	158	181	139	176	173	210	129	198	164	142	171	211	209	197	103	120	125	229	94	34	39	113	22	42	145	226	248	142	184	187	141	191	162
20131217	6	127	144	130	127	109	131	183	198	120	172	151	127	152	206	200	222	41	113	125	174	61	20	16	54	22		149	221	212	157	129	130	122	137	131
20131217	7	96	102	90	96	69	92	130	189		125	135	79	136	181	195	231	35	91	132	169	46	13	11	23	20		143	217	200	165	121	110	71	104	92
20131217	8	46	58	42	64	29	49	44	156		69	106	74	128	133	169	163	20	66	112	183	51	14	23	8	19		140	233	213	148	63	74	29	89	42
20131217	9		23		28	24	20	42	147		33	83	46	122	104	80	58	16	13	79	114	68	12	25	5	20		144	253	217	121	28	29	24	36	21
20131217	10	15	18		22	24	17	34	165		26	55	57	63	32	31	26		14	76	55	79	14	33	10	15		74	242	221	89	27	21	24	26	19
20131217	11	27	26	34	28	24	22	35	106	42	30	53	46	39	25	22	24	13	21	45	45	31	10	46	18	20	12	66	205	192	60	28	26	30	30	18
20131217	12	28	25	29	27	26	13	29	17		29	39	27	38	24	21	17	10	27	48	38	57	10	30	24			116	217	36	29	25	21	33	26	18
20131217	13	29	28	32	31	27	18	30	18		26	30	19	30	30	18	15	10	22	35	15	23	6		22	11		65	223	26	29	25	21	33	26	18
20131217	14	32	27	31	26	27	24	26	12		24	30	24	22	31	18	14		18		11	35	8		17	16		12	225	25	32	34	26	27	30	20
20131217	15	27	25	29	27	25	18	21	11		19	28	19		28	23	18		15	12	10	42	10	16	17	17		11	202	29	28	29	28	25	32	18
20131217	16	29	24	26	28	26	24	23	18	16	21	22	14		35	24	14		18	12	12	58	12	21	19	20		18	153	172	32	30	26	17	28	20
20131217	17	26	20	24	25	21	23	23	15		19	27	19	31	40	78	182	7	19	19	12	53	10	13	17	19		136	135	153	31	31	25	17	32	21
20131217	18	23	23	24	23	22	26	20	20		24	35	17	59	183	184	206	20	26	18	12	47	6	15	5	20		136	142	152	47	25	20	24	31	29
20131217	19	29	18	20	21	26	34	16	24		15	96	16	187	186	159	186	23	18	17	122	18	11	18	6	20		134	168	162		26	54	24	33	56
20131217	20	32	160	23	96	23	54	26	32		23	188	22	189	171	144	151	12	11	13	118	17	4	14	5	12		123	172	162		46	162	21	153	62
20131217	21	14	41	14	59	13	14	15	17		17	183	21	184	160	133	200	9	12	23	69	15	14	15	5	11		114	221	165		20	84	16	135	14
20131217	22	14	8	12	12	13	11	22	21		16	135	13	198	150	99	200	6	6	15	4	12	12	11	3	6		40	310	172		12	12	16	15	13
20131217	23	12	8	13	11	16	9	14	18		12	38	20	160	26	14	53	9	12	18	4	13	6	13	7	8		28	191	182		8	8	15	16	10
20131218	0	10	10	12	14	13	9	14	21		14	35	16	42	20	13	22	7	13	20	4	11	5	23	4	8		4	25	169		9	8	13	11	10
20131218	1	10	13	14	10	11	14	15	22		12	19	15	16	17	13	15	8	15	17	5	12	8	14	6	15		12	8	118		12	11	12	11	8
20131218	2	12	6	8	11	9	11	13	24		9	17	12	23	17	10	13	6	19	20	3	11	7	25	6	16		11	10	102		10	10	10	20	8
20131218	3	14	8	13	10	11	12	12	25		11	15	14	23	11	9	14	7	14	22	5	14	3	27	15	15		4	12	49		11	10	12	28	8
20131218	4	14	8	13	10	11	12	12	25		11	15	14	23	11	9	14	7	14	22	5	14	3	27	15	15	8	4	12	49		11	10	12	28	8
20131218	5	16	9	15	14	10	11	16	38		15	17	17	32	14	10	12	7	13	23	6	9	6	27	12	11		10	10	27		12	8	14	28	8
20131218	6	15	13	18	12	12	11	19	42		16	21	15	36	16	12	12	5	12	28	6	19	6	23	8	10		6	9	26		9	10	14	29	12
20131218	7	18	13	22	13	12	24	21	30		15	18	20	39	34	15	19	14	14	31	5	17	10	24	11	8		7	13	21		15	16	18	35	16
20131218	8	19	20	15	16	14	16	17	16		15	22	20	48	49	17	31	26	17	32	7	21	16	31	10	13		7	25	19		15	17	15	36	12
20131218	9	14	19	17	11	14	11	21	14		16	30	19	83	53	24	63	28	20	25	14	41	8	49	11	10		10	40	17		17	15	14	35	11
20131218	10	20	20	18	18	17	15		13		14	35	18	64	106	18	36	14	16	15	66	36	7	56	15	13		17	32	54		20	16	16	33	11
20131218	11	20	15	22	18	17	15		12		23	46	22	50	63	13	13	18	19	23	20	35	4	25	15	11		18	26	44		22	20	21	28
20131218	12	15	17	16	17	12	13		14		38	62	31	74	41	15	17		8	37		30	5	16	14	16		6	11	34		17	20		41
20131218	13	17	26	18	42	14	16	25	10	18	48	73	53	76	53	33	10	13	13	64		28	11	22	3	14		11	17	59		25	38		48	7
20131218	14	26	37	38	52	14	17	49	13		73	75	64	73	76	40	11		12	72		24	7	20	3	15			35	73		53	48	15	58	15
20131218	15	63	55	64	67		43	100	28	62	66	83	70	82	89	72		20	10	72	6	40	5	18	8	18	4	10	38	82	63	74	65	60	69	28
20131218	16	62	64	61	69		54	104	54		73	88	80	82	85	90	66	18	31	85	8	15	10	18	10	17		12	56	83		78	68	57	72	53
20131218	17	76	81	83	84	36	70	117	69	77	90	79	84	78	82	93	91	19	52	88	10	44	12	20	16	15		12	78	79	75	93	80	74	88	58
20131218	18	90	80	84	83	79	80	116	85		87	95	87		90	93	110	31	49	94	14	46	22	27	53	22	11	11	91	83	92	92	85	83	92	70
20131218	19	92	86	92	101	73	87	130	112		111	111	122		95	119	108	39	40	100	44	42	41	34	43	26		12	101	90	123	105	94	84	104	70
20131218	20	97	94	94	100	81	85	138	100		109	117	113	76	122	107	160	52	36	106	73	58	70	21	56	20		27	117	100	117	108	97	96	102	75
20131218	21	105	84	97	100	81	96	152	104	92	123	152	108	126	144	109	152	68	81	105	56	53	16	19	62	16	6	54	124	113	139	108	97	95	98	122
20131218	22	106	88	103	97	117	129	163	106	83	110	154	116	150	170	136	175	60	77	117	56	59	4	13	52	7		63	125	103	137	110	102	88	104	168
20131218	23	145	91	107	103	99	184	159	107		124	138	130	164	182	146	217	60	103	128	61	48	7	33	40	7		36	113	101	150	114	119	104	124	236
20131219	0
20131219	1
20131219	2
20131219	3
20131219	4
20131219	5
20131219	6
20131219	7
20131219	8
20131219	9
20131219	10
20131219	11
20131219	12
20131219	13
20131219	14
20131219	15
20131219	16
20131219	17	46	49	57	59	30	33	108	20	46	63	72	60	62	59	60	23	13	21	61	9		8	11	13	17	7	11	26
20131219	18	59	60	73	68	32	44	104	46	59	78	87	82	77	79	64	59	14	28	76	18		16	13	24	20	10	18	44	47	76	81	69	63	82	40
20131219	19	79	72	80	82	39	45	122	52	64	90	110	100	93	90	68	64	27	37	92	57		35	27	34	24	18	26	65	59	92	82	74	73	86	66
20131219	20	102	76	85	83	54	79	133	76	68	98	121	110	104	85	92	97	36	54	99	34		37	39	39	26	18	25	82	68	136	96	79	83	90	64
20131219	21	89	76	81	91	79	80	138	83	81	93	133	125	121	75	102	151	59	70	95	45		48	49	42	16		45	93	88	140	88	79	87	89	69
20131219	22	95		85	88	82	80	154	136	63	108	109	130	141	85	112	163	118	67	103	53		29	47	36	12		54	106	81	146	97	80	90	94	74
20131219	23	91	75	97	101	94	81	156	134	61	154	115	122	183	97	139	175	42	57	113	44		4	38	39	13	12	63	121	85	177	102	89	91	104	86
20131220	0	107		94	109	113	106	140	134	61	154	115	122	183	97	139	175	42	57	113	44		4	38	39	13	12	63	121	85	177	102	89	91	104	86
20131220	1	116	87	112	110	92	82	138	142	45	213	105	102	191	130	244	153	20	72	93	30		6	23	6	18	9	37	108	114	192	104	96	106	140	69
20131220	2	54	86	91	94	65	49	138	132	45	193	104	89	185	148	123	79	14	104	81	52		7	36	6	18		31	118	149	184	108	101	72	126	50
20131220	3	28	42	35	50	38	21	146	127	31	185	95	63	177	198	35	80	13	166	76	6		7	42	9	16	10	18	135	140	181	52	59	28	102	37
20131220	4	20	15	26	27	27	16	88	124	23	148	79	57	155	136	25	42	9	140	74	6		3	43	10	13	9	14	129	140	177	26	25	27	62	33
20131220	5	15	11	20	17	29	20	62	113	21	102	68	54	127	78	23	35	9	103	72	5		9	72	10	14	8	11	145	141	160	14		26	46	32
20131220	6	23	16	22	19	39	18	68	106	20	108	67	38	106	144	22	41	10	15	63	8		15	86	10	15	10	11	159	137	151	19	20	27	38	38
20131220	7	27	19	25	19	27	25	70	91	24	78	66	43	96	186	17	51	15	15	58	5		20	68	11	16	10	11	163	127	163	23	24	21	40	26
20131220	8	17	17	21	18	19	25	63	88	21	51	67	59	133	147	21	62	12	16	75	10		22	85	13	17	15	18	190	144	156	22	20	21	41	28
20131220	9	16	17	27	18	25	20	53	106	37	125	76	63	123	151	34	68	12	21	90	12		13	62	13	18		21	108	187	143	21	20	25	38	27
20131220	10	22	16	26	20	39	23	56	52	27	64	103	34	175	75	54	47	17	21	89	12		11	42	13	20	14	21	53	148	158	21	19	25	39	33
20131220	11	26	27	29	21	23	25	57	19	21	22	51	21	128	31	30	26	18	18	57	14	3	7	26	14	21	6	10	30	89	125	30	24	22	29	41
20131220	12	13	15	16	15	14	7	52	12		18	28	21	48	19	28	25	12	12	28	7	32	12	16	16	19		8	21	96	64	18	17	16	3	12
20131220	13	14	10	16	14	12	9	56	9	8	13	20	21	48	19	28	25	12	12	28	7	32	12	16	16	19	5	8	21	96	64	18	17	16	3	12
20131220	14	12	8	15	14	13	11	27	9	13	11	15	13	55	12	12	10	5	13	9	9	18	3	14	14	16	3	5	14	78	51	14	13	13	13	17
20131220	15	16	13	16	13	13	19	27	8	12	14	21	14	37	11	17	10	5	14	5	5	27	5	14	13	20	5	6	12	22	49	15	12	10	11	15
20131220	16	18	15	15	14	17	21	27	10	7	10	19	14	46	12	19	10	9	16	7	8	43	13	17	12	23	3	10	10	18	51	22	17	17	15	16
20131220	17	20	13	17	19	17	20	31	12	12	11	40	11	20	21	26	18	8	24	9	6	45	11	17	19	23	7	13	16	27	58	19	19	22	20	24
20131220	18	24		27	20	18	28	49	23	11	17	66	21	83	34	36	28	13	30	19	10	41	12	32	23	21	11	13	35	54	105	24	23	24	24	35
20131220	19	49		28	26	21	30	61	44	18	43	86	38	103	68	46	97	14	41	51	27	78	7	43	44	19	10	14	62	77	126	28	28	31	41	48
20131220	20	37		34	30	28	27	86	64	26	99	103	48	118	96	60	202	22	33	85	49	75	9	31	3	27	8	10	106	58	141	39	42	30	62	82
20131220	21	23		23	30	27	33	100	77	37	83	112	92	133	97	61	166	27	14	111	24	71	5	28	5	23	8	14	120	58	156	25	29	27	48	69
20131220	22	38		23	21	40	49	111	117	27	122	99	63	218	109	56	69	20	12	103	27	42	5	29	4	15	7	13	111	64	165	31	24	27	30	58
20131220	23	44		36	32	71	42	102	106	22	177	169	42	251	122	44	60	14	10	70	8	36	8	19	7	17	5	22	128	74	157	44	38	38	49	53
20131221	0	29	23	36	34	45	33	98	109	17	151	129	54	300	147	45	37	16	11	75	10	29	10	19	5	27		16	167	102	165	34	27	41	38	42
20131221	1	24		34	26	38	26	59	121	25	168	137	70	255	160	45	25	7	12	66	17	20	9	62	7	21	10	17	156	198	192	24	22	33	26	38
20131221	2	18		25	26	36	18	69	119	30	172	115	71	193	186	38	41	7	23	61	23	26	3	53	10	19	5	22	111	141	196	24	19	22	31	29
20131221	3	15		18	21	22	16	40	125	27	145	60	31	150	209	21	28	6	120	47	45	15	7	59	17	20	11	22	84	87	222	23	21	13	40
20131221	4	12		14	20	20	14	48	88	20	26	42	43	127	150	13	18	9	86	40	34	16	7	49	15	17	11	22	61	107	235	22	16	16	37	25
20131221	5	18		14	17	16	11	53	70	18	11	37	45	91	41	9	14	8	68	31	35		4	41	16	17	9	14	56	147	190	23	21	16	34	25
20131221	6	19		16	17	18	14	48	63	17	10	39	44	63	108	17	14	10	55	37	26	18	8	38	15	20	8	15	36	148	134	20	19	17	38	26
20131221	7	19		18	16	13	15	56	49	17	38	28	43	56	183	29	18	7	79	38	18	26	11	48	16	20	8	13	52	155	171	23	23	17	37	27
20131221	8	20		18	17	15	15	67	63	18	56	40	36	99	141	21	23	11	105	40	24	24	5	66	22	23	8	11	61	181	166	24	22	17	34	31
20131221	9	18		21	18	16	25	84	76	17	58	50	41	115	136	41	21	7	93	38	39	27	10	77	19	26	9	11	74	187	152	35	23	19	35	34
20131221	10	27		22	19	25	36	63	106	40	38	63	30	137	101	42	29	13	112	37	45	30	7	95	17	35	11	12	66	201	173	22	21	20	35	31
20131221	11	29		26	23	29	34	48	79	51	32	42	34	108	34	34	28	12	112	50	68	30	9	70	33	38	12	26	39	81	123	37	22	26	29	39
20131221	12	34	29	30	29	32	32	56	69	42	41	52	39	75	44	39	22	12	127	37	47	21	12	46	63	35	8	28	28	51	71	42	27	35	23	33
20131221	13	31	34	40	38	30	24	58	49	34	52	60	52	83	76	46	23	8	104	46	16	16	7	42	83	30	6	18	33	73	69	33	33	33	44	25
20131221	14	35	39	44	46	30	28	61	37	36	75	78	63	102	112	57	27	12	73	63	8	31	8	40	88	32	6	14	47	114	129	46	47	40	59	27
20131221	15	54	74	68	75	39	41	88	42	56	85	100	74	172	103	96	35	12	56	71	82	43	5	39	78	21	5	12	71	121	134	80	80	56	91	32
20131221	16	88	98	85	104	63	75	116	58	76	114	126	98	162	94	112	62	33	41	97	15	24	8	37	67	22	3	16	94	162	165	102	105	77	116	58
20131221	17	113	106	104	114	89	103	143	73	92	127	169	121	174	128	107	121	36	39	133	14	28	16	41	63	35	10	21	102	180	183	124	113	77	116	58
20131221	18	125	101	128	128	111	110	177	94	101	164	195	168	202	160	135	135	43	73	165	25	34	48	52	68	40	7	27	115	215	201	140	123	116	139	95
20131221	19	171	122	167	162	127	137	224	102	133	200	200	197	218	202	149	161	87	106	175	40	85	85	87	74	38	10	38	128	354	297	192	168	146	175	109
20131221	20	218	152	199	186	160	201	253	106	154	218	206	200	250	211	241	170	141	92	170	96	79	104	179	74	50	14	103	129	344	312	214	189	185	202	167
20131221	21	226	182	213	212	193	212	269	117	132	260	216	201	311	240	287	184	148	66	140	127	68	59	161	65	53	31	116	217	312	271	232	207	210	227	193
20131221	22	245	200	204	235	195	217	278	116	115	326	198	181	310	270	325	244	151	68	114	54	56	76	125	60	53	26	129	247	332	290	232	205	198	221	200
20131221	23	230	196	195	237	194	209	263	125	101	323	192	133	242	285	344	320	130	65	103	51	62	75	116	60	47	22	141	298	327	269	223	197	189	222	209
20131222	0	216	190	194	232	187	200	257	118	103	291	224	120	255	343	361	350	80	70	92	60	65	76	136	63	45	22	154	267	328	357	207	197	180	265	186
20131222	1	185	174	144	266	154	155	163	120	94	217	155	116	260	400	387	365	103	67	80	90	55	54	131	65	50	23	167	300	355	295	211	200	112	292	187
20131222	2	117	178	107	294	196	130	131	116	95	175	120	94	220	387	413	439	76	62	75	79	55	42	132	61	51	29	174	342	356	241	175	211	125	323	164
20131222	3	115	181	160	195	162	128	177	114	96	182	85	105	223	391	424	472	50	96	60	68	54	34	130	62	49	21	173	332	346	285	141	157	178	346	162
20131222	4	119	136	155	139	86	153	185	115	91	166	85	99	172	448	444	455	37	59	59	54	53	32	121	51	51	21	168	302	348	290	117	117	112	249	162
20131222	5	132	106	88	114	57	148	165	123	73	148	66	92	144	401	384	324	28	60	45	54	43	28	120	51	53	17	176	326	334	279	121	111	66	133	146
20131222	6	88	105	56	93	39	103	111	142	55	140	64	55	103	371	231	193	25	67	48	50	36	30	107	57	59	19	178	337	324	254	100	104	36	137	113
20131222	7	53	65	34	53	33	65	73	144	34	108	62	54	107	360	165	139	32	67	45	66	36	39	89	54	64	16	159	328	321	263	57	59	29	97	95
20131222	8	38	39	26	29	28	51	94	154	34	69	77	61	92	340	146	107	30	80	49	56	41	38	106	56	66	23	128	385	323	267	38	33	27	51	77
20131222	9	47	34	32	33	38	49	120	155	41	65	74	66	119	322	118	180	32	100	50	92	50	53	119	53	65		142	393	342	303	49	42	39	56	75
20131222	10	35	38	68	41	70	44	153	158	66	40	121	71	172	319	116	164	41	100	54	76	64	74	98	112	78	19	145	453	407	287	41	39	69	57	58
20131222	11	54	35	63	38	55	55	126	116	115	61	73	99	218	326	120	182	61	150	66	96	56	59	136	154	83	21	202	478	400	245	47	38	44	52	55
20131222	12	59	53	55	42	56	78	127	115	127	76	89	111	170	250	100	202	85	181	69	188	53	41	119	149	77	23	241	493	365	192	49	42	56	26	85
20131222	13	86	64	67	51	80	114	124	137	123	70	99	95	150	199	76	246	57	163	85	175	51	25	111	159	78	23	172	459	359	195	63	55	56	26	85
20131222	14	94	62	73	59	81	105	116	136	103	78	113	93	170	301	106	263	73	137	99	139	37	27	113	158	75	18	169	407	340	180	76	62	68	62	117
20131222	15	83	65	71	66	79	129	111	95	74	93	134	87	198	243	187	289	136	124	103	156	41	30	88	137	72	16	191	365	279	269	73	62	71	72	133
20131222	16	76	72	78	147	68	115	125	78		232	170	118	221	259	252	220	168	99	120	170	50	39	88	116	67		205	371	233	284	90	106	72	185	119
20131222	17	186	225	202	295	87	171	222	85	102	251	211	164	307	284	270	233	190	80	156	227	53	59	88	106	79	26	255	363	214	336	283	274	156	284	209
20131222	18	297	272	240	291	264	283	274	89	130	295	288	218	346	290	329	287	247	87	199	305	73	101	95	114	96	51	341	357	244	332	318	278	235	292	252
20131222	19	312	271	284	303	270	275	338	115	176	339	337	304	382	306	349	300	339	123	228	422	124	143	170	116	104	90	380	326	283	362	322	284	245	303	249
20131222	20	322	276	326	327	232	283	386	155	206	378	350	292	380	325	358	321	349	126	185	395	111	173	208	127	111	103	322	379	285	488	346	316	294	344	245
20131222	21	338	299	329	361	247	296	363	168	176	401	359	248	437	347	378	365	403	135	144	377	98	149	190	125	98		297	436	292	421	369	343	293	365	260
20131222	22	348	319	326	355	250	312	340	225	172	444	382	225	500	361	423	429	425	126	123	268	118	135	219	118	97	61	325	404	292	384	345	335	304	360	266
20131222	23	319	299	312	335	253	310	285	196	200	489	370	193	324	363	471	412	385	120	114	237	93	147	201	110	95	45	318	500	304	344	331	324	266	370	304
20131223	0	301	288	234	357	199	376	269	203	207	276	266	160	285	351	473	500	242	114	114	215	90	118	187	110	87	42	297	427	299	335	323	308	186	400	400
20131223	1	234	278	188	408	180	408	279	210	176	231	228	153	313	383	461	500	185	122	103	274	85	100	203	109	86		260	443	304	375	283	325	195	419	434
20131223	2	247	282	188	332	236	371	244	205	164	191	162	143	243	441	440	500	115	104	99	224	91	89	198	94	74	32	215	439	317	387	239	244	186	394	426
20131223	3	275	217	183	254	244	396	220	204		197	160	125	237	500	455	500	82	132	94	208	81	64	194	93	54	27	184	436	362	357	231	225	203	318	396
20131223	4	274	209	244	226	200	357	206	202	151	169	131	101	232	464	486	319		173	85	201	79	55	198	94	59		141	468	342	336	305	255	266	252	314
20131223	5	127	237	237	234	183	262	226	206	137	172	108	100	191	328	417	238	87	170	75	179	77	47	182	71	55	28	111	459	340	302	221	216	179	259	151
20131223	6	99	159	178	161	139	157	251	208		182	112	92	157	284	334	122	74	140	74	192	72	44	169	51	56		73	477	368	292	130	133	131	177	120
20131223	7	77	107	132	96	136	89	253	199	135	208	120	96	159	230	193	85	68	155	72	170	70	36	155	46	50	24	63	493	373	306	94	81	131	114	104
20131223	8	95	77	119	80	169	87	257	190		191	140	85	171	200	126	84	58	198	66	151	70	51	173	39	43	23	62	500	381	313	100	87	112	98	99
20131223	9	80	82	112	87	176	90	271	249	128	169	115	85	144	221	322	86	30	218	87	117	72	55	198	33	36	22	65	489	402	306	110	92	117	123	110
20131223	10	78	86	98	81	121	73		292	144	165	179	115	173	211	215	102	32	166	99	130	64		215	34	52		62	471	391	313	90	74	95	92	79
20131223	11	64	3	65	69	70	59	191	274	139	112	157	128	186	149	102	131	29	181	104	132	48	24	202	41	62		48	311	359	301	86	63	71	86	60
20131223	12	62	3	58	3	69	44	119	178	87	62	86	97	161	87	50	77	23	191	115	187		22	137	52	51		54	210	192	3	59	47	57	57	35
20131223	13	62	3	58	3	69	44	119	178	87	62	86	97	161	87	50	77	23	191	115	187		22	137	52	51	20	54	210	192	3	59	47	57	57	35
20131223	14	40	38	48	45	35	30	86	94		56	84	70	109	29	43	24	19	148	84	64	23	14	85	185	48		69	74	65	139	41	44	46	49	27
20131223	15	38	36	41	42	35	34	81	96	71	54	72	57	93	61	38	15	3	81	78	28	18	13	73	148	46		64	68	47	154	39	39	44	41	28
20131223	16	40		45	40	36	30	70	81		51	70	58	102	30	33	47	3	65	78	35	21	14	64	102	48		44	99	52	156	42	38	39	45	29
20131223	17	34	30	39	41	34	29	66	64	67	49	138	79	159	48	64	82	8	51	80	58	432	22	62	106	51	16	63	118	77	151	42	39	34	45	28
20131223	18	76	82	53	57	64	89	103	78	48	121	165	131	187	74	102	118	66	49	107	31		35	83	101	103	16	77	234	103	158	91	85	43	73	88
20131223	19	112	92	90	98	87	108	197	103	42	169	184	148	210	137	144	171	99	93	117	50	86	84	126	149	107	34	111	279	117	188	133	110	94	110
20131223	20	139	118	108	144	105	160	162	132	64	157	258	165	210	146	182	232	132	87	123	81	107	113	117	80	92		157	366	143	267	157	159	115	186	134
20131223	21	188	140	173	197	141	179	181	166	124	201	185	149	179	170	220	267	165	94	133	76	100	106	147	86	76		146	406	149	284	209	204	149	197	173
20131223	22	205	176	190	204	181	180	267	171	140	226	156	174	274	191	212	270	179	78	122	82	83	148	143	80	65		152	473	216	291	242	236	178	214	173
20131223	23	221	208	198	211	203	183	277	167	140	226	144	199	212	206	217	291	184	74	120	75	77	136	131	107	63		179	479	180	243	270	260	184	225	184
20131224	0	240	231	195	233	197	189	271	177	144	255	155	167	196	204	232	431	252	81	109	109	77	97	123	82	56		199	500	166	240	267	255	194	255	208
20131224	1	248	234	201	199	188	202	273	192		227	144	143	179	273	247	428	270	85	94	85	77	107	125	85	59	50	222	436	271	247	267	249	198	240	233
20131224	2	236	230	200	187	212	262	207	200	134	190	191	111	151	231	262	404	258	77	85	70	80	121	124	94	58		239	424	261	232	254	221	184	208	286
20131224	3	246	213	185	195	256	345	197	212	114	171	160	118	138	224	276	380	205	84	77	64	66	85	124	92	58		241	440	194	212	230	226	168	207	362
20131224	4	290	224	176	198	271	423	206	196	100	163	115	97	168	255	308	378	188	100	77	57	66	68	140	103	64		249	455	190	310	263	228	212	231	399
20131224	5	334	245	210	248	256	400	208	195	105	143	98	89	170	282	328	373	142	92	74	58	78	61	138	94	69		250	490	190	260	311	273	220	287	365
20131224	6	360	267	239	291	245	349	201	203	110	149	95	116	191	329	332	384	108	98	72	66	79	61	118	94	67		194	500	223	254	320	299	263	312	314
20131224	7	333	273	258	307	216	288	197	202		172	96	126	140	340	328	352	91	94	73	72	81	61	115	99	64	80	149	500	209	206	315	318	237	327	256
20131224	8	293	268	231	313	182	235	213	201	124	184	111	146	138	378	364	334	78	102		80	88	72	119	104	67	76	80	497	217	224	278	281	203	327	238
20131224	9	266	251	222	285	149	227	209	218		214	131	127	177	360		381	73	105		94	105	82	112	105	80		76	500	233	243	279	271	195	302	239
20131224	10	229	252	210	265	130	224	191	221		207	143	125	178	449	320	298	84	114		97	122	93	140	108	75		65	500	314	296	260	273	181	357	214
20131224	11	212	267	210	247	131	233	213	183	148	215	126	145	213	387		268	106	171		148	155	73	151	155	77		167	434	3	217	259	260	194	333	218
20131224	12	205	292	220	278	151	232	247	176	159	221	168	161	253	346	3	215	143	188		141	134	71	131	145	89		209	368	3	253	267	262	198	386	217
20131224	13	205	292	220	278	151	232	247	176	159	221	168	161	253	346	3	215	143	188		141	134	71	131	145	89	70	209	368	3	253	267	262	198	386	217
20131224	14	287	384	248	424	233	277	304	203		330	270	205	331	355	299	262	156	222		81	161	96	117	216	99		136	338	350	323	421	389	218	417	251
20131224	15	328	392	302	384	262	293	289	223		295	330	236	333	298	366	319	180	198		105	185	116	126	218	163		157	292	338	350	431	353	274	384	267
20131224	16	343	340	327	339	278	320	334	247	224	294	320	285	313	287	341	334	181	195		116	166	120	123	205	184	79	189	233	347	278	397	316	306	340	281
20131224	17	347	306	291	286	274	299	359	232		300	296	250	321	294	352	344	194	197		146	211	134	127	201	187		215	229	361	229	346	319	274	305	263
20131224	18	318	308	320	278	266	281	359	236	231	325	300	257	334	297	359	413	194	202		176	188	144	139	207	197		222	282	368	233	360	305	296	294	254
20131224	19	288	301	305	300	261	266	372	247	233	322	320	262	377	335	377	472	234	211		184	193	179	170	204	237	137	218	389	379	247	334	320	288	311
20131224	20	300	293	305	313	256	280	367	259	234	325	333	260	437	370	437	500	233	227		222	196	204	203	210	215		206	382	452	263	322	310	277	311
20131224	21	289	285	301	320	240	299	344	297	238	321	306	262	412	413	486	500	239	236		201	203	201	221	233	206		221	392	435	322	300	323	277	343	290
20131224	22	258	275	285	321	229	264	328	310	247	321	318	263	448	432	485	500	252	235		216	208	215	236	244	206		232	442	413	357	284	320	264	390	260
20131224	23	240	259	278	262	261	240	343	302	241	315	307	275	419	450	487	500	254	246		194	204	207	245	262	209	141	230	435	413	395	270	248	267	283	245
20131225	0	232	227	283	246	295	255	333	299		294	304	277	378	467	383	500	249	249		180	198	188	239	240	213		291	408	425	383	239	222	269	247	250
20131225	1	247	203	255	235	267	255	330	313	243	286	291	274	352	500	357	500	232	233		190	205	177	276	254	216		329	475	438	386	261	226	242	234	269
20131225	2	261	216	247	252	277	254	348	316		264	291	269	315	500	374	500	238	228		186	197	173	287	233	188		340	445	499	362	270	243	251	245	267
20131225	3	275	229	244	240	254	255	349	315	238	250	283	255	301	500	336	500	226	219		183	195	160	232	223	164		344	500	481	375	275	250	249	246	265
20131225	4	262	235	246	237	258	255	326	313		247	269	245	303	412	296	407	210	217		180	195	159	242	220	172		322	500	450	359	264	250	238	238	280
20131225	5	254	228	243	241	259	259	308	310	247	254	263	229	288	386	260	367	180	220		177	197	166	240	221	145		314	500	472	305	266	236	238	234	295
20131225	6	234	221	237	244	265	271	326	303	241	284	259	216	273	378	268	337	191	219		182	200	162	219	226	149		317	500	456	285	264	241	247	243	309
20131225	7	208	216	247	241	249	227	333	302		269	263	222	268	319	268	284	226	221		219	200	167	206	216	151		322	500	452	277	248	240	237	245	254
20131225	8	217	210	235	238	235	214	357	297	240	275	243	253	278	293	283	290	213	246		222	213	177	208	226	142	173	258	500	463	289	219	210	226	242	230
20131225	9	3	191	230	227	259	220	357	312	239	284	230	234	292	293	257	223	187	260		197	235	195	234	252	135		241	500	446	305	233	213	233	222	219
20131225	10	3	191	230	227	259	220	357	312	239	284	230	234	292	293	257	223	187	260		197	235	195	234	252	135	161	241	500	446	305	233	213	233	222	219
20131225	11	247	235	275	231	322	241	418	322		325	269	255	310	399	286	3	210	298		327	249	196	271	280	122		269	500	500	346	262	241	291	251	219
20131225	12	265	251	291	254	316	258	406	366		343	296	289	3	443	290	3	222	305		249	223	195	214	248	119		275	500	416	321	277	248	306	268	245
20131225	13	265	251	291	254	316	258	406	366	303	343	296	289	3	443	290	3	222	305		249	223	195	214	248	119	3	275	500	416	321	277	248	306	268	245
20131225	14	112	283	131	310	72	98	139	49		339	3	300	245	413	361	196	243	143		281	247	173	54	61	37	90	306	3	363	303	229	310	91	338	101
20131225	15	50	202	61	231	49	47	153	43	52	3	218	209	347	354	455	242	173	33		272	240	3	16	32	19	29		156	373	311	89	223	54	3	39
20131225	16	38	43	41	49	33	34	132	26	34	112	213	48	347	352	394	150	107	21		127	213	80	13	21	12		82	391	385	323	46	46	35	3	27
20131225	17	31	32	31	37	29	28	129	23	25	45	42	30	351	341	73	24	41	19		111	16	99	15	14	11		66	434	417	324	42	35	30	34	26
20131225	18	21	19	26	29	22	24	261	14	8	28	20	22	50	47	32	21	17	22		69	3	11	21	12	16		36	332	446	287	30	24	23	34	16
20131225	19	22	18	27	21	24	24	228	11	17	23	16	19	37	36	24	23	14	25		40	3	14	10	14	12	11	14	33	244	47	31	27	26	36	21
20131225	20	15	20	20	20	20	20	116	15	13	30	12	18	65	45	25	24	14	15		16	8	9	10	14	11		11	33	50	18	21		15	33	16
20131225	21	14	18	14	8	13	13	78	11		15	11	14	25	14	21	18	9	16		13	7	14	11	7	8	12	8	30	38	21	16		16	15	8
20131225	22	11	9	8	12	10	8	94	8	4	10	9	16	20	12	13	17	10	8		10	9	12	16	10	10		10	18	17	12	13		14	12	12
20131225	23	9	9	7	9	9	10	42	4		8	9	9	15	12	12	17	8	8		11	8	9	20	4	10		15	21	9	8	14		11	12	10
20131226	0	11	9	38	10	11	5	31	5	8	10	6	5	13	12	12	8	8	10		9	9	10	11	4	15	9	15	11	15	7	6
20131226	1	6	10	12	10	8	8	25	3		11	6	8	15	6	11	7	7	12		11	4	10	8	8	5	8	6	9	11	6	7
20131226	2	4	8	10	6	8	10	23	4		9	6	7	11	7	10	7	7	7		6	12	5	7	6	7		6	10	7	7	12
20131226	3	5	7	10	9	8	7	20	6		8	5	6	10	5	6	6	3	7		6	22	9	6	6	11		5	10	8	6	7
20131226	4	4	9	4	5	6	5	20	6	3	8	3	5	8	5	10	7	6	3		5	13	3	5	3	7		6	7	7	7	4
20131226	5	3	4	4	7	5	3	19	4	4	6	5	3	9	8	8	7	7	5		4	7	4	4	8	6		6	9	6	6	5
20131226	6	3	4	5	5	8	4	20	5		6	3	3	8	3	6	5	5	8		3	15	4	6	7	11		3	7	3	8	4
20131226	7	5	7	5	6	8	6	18	4	3	7	6	5	11	6	9	7	6	13		3	8	6	8	4	8		3	9	4	5	8
20131226	8	4	8	7	7	6	6	20	7	5	9	7	4	10	9	8	5	11	13		4	10	5	7	3	7		8	12	7	4	8
20131226	9	9	7	10	9	10	12	22	6		11	4	7	18	11	8	8	18	13		4	11	9	6	8	14		8	16	14	4	11
20131226	10	13	7	10	6	12	8	16	7	5	14	4	4	18	13	11	9	10	14		10	7		11	12	13		4	11	16	19	13
20131226	11	13	11	15	10	13	7	37	7		10	3	3	12	12	11	14	6	14		5	10	5	11	13	11		3	12	12	29	15
20131226	12	7	9	15	14	9	10	71	3		7	5	5	12	3	17	4		11		7	8	6	8	10	10		3	13	5	17	12
20131226	13	7	9	15	14	9	10	71	3	6	7	5	5	12	3	17	4	10	11		7	8	6	8	10	10	10	3	13	5	17	12
20131226	14	9	7	12	6	7	10	27	8	9	10	7	10	12	6	9		3	12		4	14	10	10	12	11		5	10	5	23	8
20131226	15	7	12	7	5	9	7	27	6		7	5	5	14	8	10	10	4	12		7	14	5	5	10	10	3	6	10	8	17	10
20131226	16	11	9	8	9	10	8	27	7	9	8	8	5	14	8	8	10	3	8		6	5	3	6	8	12		7	13	7	16	12
20131226	17	7	7	11	9	10	7	25	5	4	10	5	6	16	10	9	5	7	13		5	3	4	7	7	8		6	14	10	4	3
20131226	18	11	10	29	7	9	12	24	3	5	8	9	8	15	13	10	9	10	22		5	5	7	8	6	8		19	23	14	24	14
20131226	19	13	15	14	14	13	14	17	4	5	14	11	6	15	16	9	12	11	8		14	9	5	7	5	14		18	34	16	51	15
20131226	20	16	17	25	14	18	10	33	14		9	5	5	26	21	15	6	11	9		11	6	6	9	5	8		24	12	17	86	17
20131226	21	9	9	22	17	13	16	41	15	4	19	9	4	34	19	22	8	11	8		9	7	3	15	5	6		17	8	25	94	9
20131226	22		14	16	18	16	10	48	17		18	7	5	23	17	27	5	15	11		9	8	6	20	4	15		15	10	29	98	11
20131226	23	14	13	15	15	13	14	36	11	11	15	6	21	37	16	18	5	22	23		12	9	13	29	8	12	3	15	15	27	111	16
20131227	0	17	10	15	15	12	12	38	7		19	4	16	25	16	15	9	28	23		19	31	16	31	10	18	6	15	20	25	121	12		15	18	10
20131227	1	15	9	19	13	15	12	47	7	3	15	3	7	30	12	15	8	26	18		20	40	19	12	7	11	9	10	23	31	138	17		22	20	13
20131227	2	12	12	18	12	13	11	32	8		10	8	7	8	15	17	13	13	18		13	8	11	15	9	7	10	9	20	58	164	15		17	32	15
20131227	3	10	9	30	11	14	13	16	5	4	8	5	8	15	10	14	10	4	13		7	7	30	25	8	15	9	7	21	54	171	15		17	30	9
20131227	4	13	10	11	9	13	13	20	11		4	5	7	11	7	14	9	3	12		19	5	21	28	10	15		13	14	58	147	15		13	27	9
20131227	5	13	7	12	10	12	9	21	14	6	8	5	7	14	7	14	13	6	12		9	23	16	29	13	16	4	12	14	54	128	12		13	25	9
20131227	6	11	13	15	13	15	11	24	10		8	7	5	8	11	13	13	7	13		14	20	20	23	11	15	8	10	21	82	124	13		15	28	8
20131227	7	16	15	17	13	14	8	30	6	4	16	10	11	14	6	14	12	14	13		12	29	20	32	13	17		8	25	54	138	13		12	35	8
20131227	8	17	9	17	15	16	12	26	6		18	20	8	15	10	15	14	19	20		10	29	40	35	8	14	7	8	30	50	130	15		17	36	15
20131227	9	17	20	19	13	22	13	34	10	12	18	40	12	39	11	14	19	25	18		21	67	45	50	11	16	15	9	48	56	143	16		16	37	14
20131227	10	23	16	19	12	21	15	32	8		12	39	10	51	26	18	20	23	16		41	55	55	50	12	18		31	47	88	162	3		15	32	14
20131227	11	18	17	20	16	22	15	37	8	19	11	48	9	62	25	18	20	23	18		26	44	61	38	12	20		22	32	96	249	3	32	18	32	14
20131227	12	18	16	16	18	18	15	34	11	15	12	71	9	55	23	19	23	15	19		16	39	29	31	13	20		14	23	53	215	16	37	18	16	16
20131227	13	16	16	15	14	18	21	30	6		8	38	13	39	22	20	17	12	14		9	27	9	21	15	21		12	21	35	143	19	35	19	18	15
20131227	14	21	17	17	13	12	11	28	6	3	23	44	13	40	19	19	15	16	12		12	23	16	19	13	18		14	20	42	56	19	30	19	17	14
20131227	15	16	13	16	13	19	9	25	14		36	62	31	52	31	16	20	22	22		16	29	16	15	17	25		6	19	46	47	14	31	15	17	11
20131227	16	14	14	16	25	13	13	33	16	9	42	77	69	53	32	16	13	22	25		18	30	20	18	24	19		10	19	38	50	20	28	17	34	14
20131227	17	14	24	36	38	13	13	65	14		50	84	79	48	29	27	16	25	33		23	36	17	21	18	25		21	24	46	41	32	46	17	45	16
20131227	18	36	35	56	42	31	21	109	18	40	56	97	87	56	46	26	23	55	46		32	41	36	19	45	23		43	48	42	42	57	3	54	40	15
20131227	19	54	42	66	42	44	47	111	17		80	114	102	92	72	60	50	66	47		60	51	50		42	23		30	69	88	58	52	34	66	51	26
20131227	20	62	52	69	70	29	46	81	20		101	106	100	93	96	110	79	45	71		71	49	70	17	40	27	15	25	66	80	72	72	43	70	67	45
20131227	21	45	58	31	76	76	112	38	15	11	98	56	57	127	128	121	126	56	68		108	47	83	17	48	29		30	133	95	144	49	75	20	99	119
20131227	22	45	58	31	76	76	112	38	15	11	98	56	57	127	128	121	126	56	68		108	47	83	17	48	29	23	30	133	95	144	49	75	20	99	119
20131227	23
20131228	0
20131228	1
20131228	2
20131228	3
20131228	4
20131228	5
20131228	6
20131228	7
20131228	8
20131228	9
20131228	10
20131228	11	8
20131228	12	14	7	15	13	10	5	32	3		18	7	6	19	14	14	8	10	9		9	12	5	15	11	17	9	6	15	12	30	17	11	14	15	6
20131228	13	15	9	11	14	12	14	22	6	10	12	5	5	27	16	16	13	14	10		9	14	8	12	14	15		4	15	11	22	17	12	13	14	9
20131228	14	9	11	11	11	11	15	27	5	3	7	7	11	24	13	13	10	10	14		8	19	4	10	12	18		6	12	13	21	17	9	9	14	7
20131228	15	23	5	10	5	9	10	18	6		7	3	13	20	11	12	10	9	11		8	19	4	11	10	12		7	13	20	23	20	12	12	13	9
20131228	16	11	11	7	10	9	5	23	6		14	14	15	25	10	13	6	12	16		8	15	7	12	13	13	8	7	20	26	25	16	11	13	12	7
20131228	17	13	12	12	13	9	9	31	13	13	14	33	12	37	9	16	14	16	18		12	19	18	14	11	15	7	11	26	28	21	18	15	9	15	10
20131228	18	13	19	19	22	16	14	40	12		43	48	21		32	18	18	20	16		15	43	36	11	14	14		14	34	39	28	27	20	16	28	14
20131228	19	33	30	24	37	15	23	47	12	11	60	58	28	3	107	44	27	30	19		35	20	51	18	25	21		24	66	54	50	45	33	20	41	13
20131228	20	31	30	24	48	21	23	48	22	15	64	79	28	88	110	77	41	33	28		69	35	63	34	22	25		40	69	115	54	43	43	23	52	19
20131228	21	35	30	26	47	20	24	52	19		90	73	53	125	93	109	34	27	26		81	75	65	27	23	22	19	53	86	96	53	36	38		57	19
20131228	22	37	34	37	57	23	28	89	9	10	84	57	61	105	87	105	52	30	26		79	99	54	27	22	21		58	73	96	58	52	41	34	56	23
20131228	23	48	42	55	59	32	44	95	17	15	90	58	60	153	103	89	69	36	23		120	101	72	20	32	20	28	46	85	104	77	56	56	52	77	26
20131229	0	56	62	65	85	41	50	106	36		100	85	89	106	95	111	96	44	25		172	86	63	23	33	19		48	88	111	155	76	78	64	101	34
20131229	1	64	71	61	78	60	59	118	23	23	90	87	80	102	117	111	93	39	24		121	117	57	19	24	22	30	55	103	115	126	87	98	60	112	60
20131229	2	71	80	52	84	70	75	110	12		120	79	71	108	116	118	101	23	19		114	101	59	12	16	24	29	49	108	122	120	95	97	63	86	64
20131229	3	69	77	38	61	54	77	121	11	10	115	66	46	99	122	131	76	21	18		123	93	48	18	15	24		59	114	126	108	94	90	58	89	61
20131229	4	61	58	23	26	22	51	110	13	15	105	51	19	89	132	106	86	19	20		103	52	36	20	13	17		48	118	122	122	62	45	51	40	46
20131229	5	20	31	26	15	15	44	72	14	11	108	41	9	85	159	55	93	21	18		114	52	27	22	15	19		39	129	125	127	36	32	21	40	44
20131229	6	28	23	17	60	25	35	49	18	7	102	56	35	124	155	129	70	71	18		90	46	30	24	20	23		37	129	153	139	38	45	26	92	48
20131229	7	46	62	42	95	27	39	70	19	12	121	68	63	136	147	152	128	64	24		104	46	28	19	20	25		35	134	143	141	96	94	32	118	52
20131229	8	71	82	74	100	37	53	98	30	14	126	55	63	118	157	157	134	41	28		135	44	42	22	25	28		33	136	142	143	108	98	59	123	58
20131229	9	65	93	75	116	62	66	103	68	18	136	56	63	143	188	208	153	61	23		138	65	49	22	32	23	22	34	154	213	184	119	111	67	150	57
20131229	10	66	100	62	119	80	58	128	84	43	129	97	75	200	174	226	178	58	23		144	88	64	21	41	24	25	28	171	185	179	97	108	63	140	60
20131229	11	62	79	64	71	61	54	100	48	55	113	87	49	146	124	149	84	70	27		177	75	47	22	28	19	23	49	140	137	156	76	86	59	119	56
20131229	12	42	50	64	58	33	71	84	29	38	105	54	69	115	117	52	85	98	29		121	71	40	21	19	22		34	62	150	126	59	59	48	86	76
20131229	13	48	62	44	53	29	71	84	29	38	105	54	69	115	117	52	85	98	29		121	71	40	21	19	22	23	34	62	150	126	59	59	48	86	76
20131229	14	34	64	52	71	33	42	68	21		60	87	36	57	42	90	39	23	26		36	54	38	13	13	23	31	25	41	58	47	67	91	37	115	35
20131229	15	63	66	51	39	39	49	79	26	34	37	37	38	47	35	46	49		27		35	59	33	20	19	23	35	45	36	54	73	72	66	47	46	31
20131229	16	41	31	35	31	53	60	59	29	40	34	48	43	94	47	37	57	26	25		43	55	27	18	46	25	40	42	42	81	73		27	34	33	60
20131229	17	40	38	47	50	37	35	78	41		71	71	52	111	59	65	52	37	33		45	22	33	27	28	30	37	53	52	77	67	56	44	39	52	36
20131229	18	78	54	92	96	57	48	119	55	45	123	100	82	129	83	89	65	64	53		55	24	38	35	44	27		47	102	97	71	106	69	77	94	44
20131229	19	115	82	120	119	82	89	150	98	43	165	112	122	151	111	135	119	72	54		98	54	61	38	66	30		51	146	108	99	130	106	105	108	69
20131229	20	113	98	110	114	95	95	171	78		174	103	127		130	137	135	89	75		113	75	74	34	49	35	41	71	118	106	154	119	117	103	122	85
20131229	21	104	97	99	109	104	90	183	69	47	147	84	115	147	167	146	142	103	116		107	91	76	31	49	29		82	161	124	131	124	104	109	127	78
20131229	22	112	91	103	122	97	89	183	83		159	76	110	108	192	193	166	105	96		155	56	122	32	49	29		96	155	120	125	115	113	117	159	84
20131229	23	114	97	122	132	94	101	195	58	24	140	88	101	90	224	253	157	130	50		164	36	112	33	53	32	47	105	176	125	184	123	121	101	166	95
20131230	0	82	100	95	137	58	83	116	29	16	138	77	95	86	170	224	126	123	40		134	40	103	31	73	24		83	150	129	156	136	129	45	164	66
20131230	1	48	100	37	78	24	27	50	18		116	18	56	85	86	149	51	107	32		128	35	80	33	66	28	47	86	157	180	230	49	127	30	121	25
20131230	2	20	82	17	29	21	18	51	21	13	26	39	17	81	171	39	20	82	27		134	41	73	25	27	27	48	98	144	155	254	23	50	15	30	19
20131230	3	22	39	19	21	18	15	66	23	11	21	28	17	102	127	20	17	78	22		171	47	57	22	26	21		86	60	170	239	21	49	18	24	18
20131230	4	23	19	17	19	28	21	56	23	21	22	17	22	104	57	22	19	86	26		134	71	55	19	20	30		62	24	168	213	22	22	27	18	18
20131230	5	22	19	25	23	31	22	48	21	21	22	20	22	104	57	22	19	86	26		134	71	55	19	20	30	38	62	24	168	213	22	22	27	18	18
20131230	6	13	15	23	25	31	24	48	18	15	27	20	17	99	86	21	26	58	32		122	80	50	31	20	30		57	28	197	202	23	22	29	18	20
20131230	7	19	10	23	22	23	21	58	18		24	26	21	92	76	20	25	77	36		100	59	51	32	26	26	32	52	33	198	173	32	19	22	26	19
20131230	8	21	16	23	24	21	19	70	23	22	25	29	23	123	45	20	18	42	35		102	27	65	30	53	25		38	37	192	177	34	19	20	24	17
20131230	9	22	22	23	22	24	20	76	29	24	31	62	27	144	125	20	24	46	43		174	54	69	36	112	30		35	39	213	202	34	25	29	28	20
20131230	10	27	18	26	21	25	23	89	26	20	28		22	175	141	23	31	47	37		165	65	75	42	78	31		47	46	192	201	40	22	25	29	19
20131230	11	27	23	22	26	23	22	83	26		30	41	22	175	141	23	31	47	37		165	65	75	42	78	31	33	47	46	192	201	40	22	25	29	19
20131230	12	18	23	22	26	23	22	83	26		30	41	24	157	141	23	28	64	28		141	60	80	31	40	30	40	46	38	166	173	39	21	25	25	18
20131230	13	18	18	22	25	19	25	174	24	23			18		13								17		21			25	23		94	31		25	21	18
20131230	14	23	15	19	21	22	22	84	22		20	76	3		21								18		27			23	24		51	29		24	18	19
20131230	15	17	13	25	20	20	24	3	20				11		21		20		27				12		27			23	24		45	31		20	20	16
20131230	16	15	14	20	20	17	19	3	17				25		17		22						10		23			19	25		40			17	24	13
20131230	17	27	22	29	26	19	27	24	19				25		29		19						16		25			26	27		55	42		24	31	20
20131230	18	33	22		37	27				22	62	84		88	29	30	19	27	30		29	14	16	18	25	27	17	26	27	67	55	42	27	24	31	20
20131230	19	63	37	75	79	34	37	63	37	28	103	93	88	98	87	91	40	44	60		86	48	73	40	24	40	32	51	73	83	131	91	70	59	88	24
20131230	20	85	65	94	89	68	74		79	35	146	100	105										139					51	87		203			93	108	49
20131230	21	88	82	93	101	84	80	118	71	46	149	122	109	152	161	205	145	56	127		177	72	116	52	29	40	38	46	130	142	234	113	88	92	107	65
20131230	22	87	84	100	97	84	85	112	89	60	149	167	133	127	140	171	147	78	63		224	72	77	37	26	36	33	45	155	164	292	103	94	94	106	74
20131230	23	97	100	96	113	86	110	108	110		135	113	129	171	145	185	152	98	150		128	63	110	37	54	39	30	79	183	221	286	114	105	98	110	94
20131231	0	96	103	106	121	86	99	119	109	58	147	84	158	168	143	213	161	87	200		133	62	104	44	45	46	43	117	194	229	320	125	110	98	123	88
20131231	1	112	107	122	131	101	99	130	98	52	156	88	126	153	165	214	176	93	130		131	90	97	49	52	51	35	116	179	323	291	138	124	110	139	83
20131231	2	128	117	132	137	110	110	157	95	48	167	110	96	156	211	245	176	174	47		119	85	97	50	47	52	33	124	185	230	281	154	145	116	173	94
20131231	3	137	144	132	147	125	130	154	96	50	166	106	82	128	203	238	188	145	54		97	103	62	50	55	55		120	209	235	272	167	164	125	181	119
20131231	4	132	154	123	160	159	134	156	73	51	147	86	65	126	186	238	217	136	55		87	88	61	60	49	50	37	117	217	246	268	174	170	124	174	132
20131231	5	117	122	109	119	100	95	140	51		92	59	37	96	206	193	169	95	51		75	60	45	45	53	48		78	186	206	224	151		104	127	101
20131231	6	106	117	98	110	112	94	118	46	47	79	64	40	78	164	194	148	79	48		75	49	46	45	49	47		59	199	203	220	143	124	94	120	76
20131231	7	88	84	58	76	62	85	75	45	37	69	43	44	81	147	159	86	79	48		75	49	46	45	49	47	28	59	199	203	220	143	124	94	120	76
20131231	8	54	34	46	41	49	71	60	48	41	52	45	40	81	111	161	61	45	49		81	37	64	43	49	49		55	204	219	222	60	46	48	60	51
20131231	9	45	31	43	46	46	46	54	43	45	52	39	41	83	123	47	55	58	52		81	86	77	36	51	52		64	180	247	197	68	50	39	62	34
20131231	10	39	26	41	39	45	41	54	42	42	44	36	38	83	123	47	55	58	52		81	86	77	36	51	52	38	64	180	247	197	68	50	39	62	34
20131231	11	33	25	33	38	42	38	48	42	38	48	32	35	39	41	41	45	42	41		123	106	85	28	46	42		75	57	162	107	65	33	35	41	24
20131231	12	28	22	28	35	33	31	45	31	32	41	27	34	59	28	32	36	33	27		75	24	30	23	33	24		42	45	92	90	49	32	29	32	23
20131231	13	26	19	29	27	29	17	27	25	22	27	24	29	70	23	28	27	18	29		121		24	19	20	28		22	29	69	73	45	26	27	32	19
20131231	14	20	17	25	26	23	23	34	26	22	28	22	23	44	18	25	21	19	25		25	11	14	19	28	29		17	31	42	28	39	21	21	27	14
20131231	15	20	16	23	24	21	15	29	14	25	22	22	22	38	32	24	18	17	26		17	12	17	21	22	22		13	24	46	17	33		21	19	14
20131231	16	19	13	17	21	16	29	24	20	21	21	21	18	33	22	21	22	19	23		13	13	10	15	26	23		15	24	30	20	30		20	21	11
20131231	17	17	18	20	26	16	20	24	19	21	24	26	19	30	15	23	22	19	20		13	11	12	18	22	27		21	36	50	31	30	21	20	25	10
20131231	18	17	17	17	21	16	25	28	14	14	22	26	22	48	25	25	23	22	23		18	14	24	10	22	21		24	62	57	64	33	21	20	25	16
20131231	19	17	12	25	21	18	21	25	17	20	21	21	31	70	39	22	21	23	19		38	23	32	12		17		29	51	77	65	26	24	18	21	11
20131231	20	22	19	27	22	17	16	23	16	19	25	26	28	91	85	35	17	25	17		80	31	38	13	3	7		38	66	67	93	29	22	29	29	14
20131231	21	23	19	28	26	18	20	33	20	21	29	45	21	127	90	50	21	19	20		55	24	36	12	12	13		36	94	131	158	30	35	26	34	13
20131231	22	20	18	27	20	22	20	29	23	18	35	58	31	149	83	36	14	31	24		45	29	50	19	18	21		29	104	100	162	26	31	25	35	17
20131231	23	20	18	23	29	22	20	31	20	18	67	50	36	137	123	64	31	28	32		34	50	65	28	25	28		26	103	81	145	37	50	22	51	27
20140101	0	35	32	45	66	20	31	57	22	17	80	67	46	129	179	102	62	24	34		61	64	59	23	27	22		21	110	90	136	75	66	35	84	45
20140102	0	83	82	82	106	94	108	141	89	38	133	59	61	107	175	227	172	95	78		86	72	72	105	55	41		56	199	182	311	109	129	84	147	136
20140103	0	184	154	168	186	197	238	217	164	26	199	68	81	244	294	303	262	199	92		218	123	107	146	61	39		92	407	224	275	177	171	177	197	270
20140104	0	77	77	81	97	79	75	103	130	95	124	148	141	129	75	83	67	48	83		48	68	60	88	39	21	38	26	87	87	188	95	82	90	103	74
20140105	0	165	152	142	153	148	177	187	195	134	162	178	181	222	206	250	262	263	142		154	161	193	185	145	121	128	45	320	304	212	182	169	153	167	184
20140106	0	122	124	128	146	124	119	131	135	124	148	150	143	139	128	148	159	128	126		143	141	126	100	70	60	120	113	201	118	135	149	146	133	152	107
20140107	0	176	162	177	166	168	168	194	211	162	206	207	168	198	214	160	196	233	189		233	230	209	192	197	165	182	122	277	183	205	174	168	181	172	169
20140108	0	18	10	10	18	9	11	16	13	9	15	18	13	16	11	29	24	9	12	11	15	20	6	21	9	10	8	12	51	20	23	13	10	10	9	11
20140109	0	18	17	22	28	103	58	19	18	21	26	20	27	59	63	41	89	14	29	20	76	40	60	38	20	23	9	20	70	67	119	20	20	20	27	61
20140110	0	79	74	63	126	57	75	55	68	37	80	57	61	125	103	110	82	43	59	39	67	53	59	80	43	28	24	64	86	87	156	88	86	63	95	68
20140111	0	106	114	99	158	99	101	142	168	46	153	88	84	160	219	266	262	179	46	56	113	81	84	99	51	36	31	130	294	275	170	125	129	100	135	103
20140112	0	23	20	38	42	16	32	24	15	21	42	11	14	25	52	53	60	81	14	11	131	81	48	21	6	16	20	74	425	206	87	33	32	31	28	14
20140113	0	66	62	63	117	53	55	56	95	43	92	69	75	83	98	83	66	77	32	36	58	49	79	105	26	17	16	44	77	65	117	72	74	57	84	48
20140114	0	210	172	162	235	145	296	156	159	102	229	131	127	238	313	287	375	147	59	96	163	93	60	119	58	11	19	144	428	246	172	166	180	144	238	268
20140115	0	119	107	113	131	103	109	124	164	90	176	100	122	192	179	222	157	212	89		108	74	81	109	72	41	25	99	159	159	180	134	126	104	134	96
20140116	0	584	523	603	623	499	534	587	161	442	685	625	585	638	584	589	539	454	294	275		159	120	106	150	170	47	395	510	479	537	621	561	551	585	494
20140117	0	291	275	299	294	277	305	294	273	327	308	420	414	271	306	285	304	316	365	379	481	338	375	319	319	348	370	310	255	250	349	323	285	291	286	268
20140118	0	321		339		48	249	376	22	70	389			364	353	379	354	143	20	219	300	158	159	47	30	16	110	107	354	327	344	380	352	325	357	165
20140119	0	130	128	123	115	138	155	143	155	147	162	241	180	166	153	176	131	110	158	200	80	114	82	112	138	112	99	63	142
20140120	0	17	15	14	14	16	16	13	20	13	18	15	19	15	12	22	18	9	13	18	50	11	11	11	9	9	3	18	27
20140121	0	5	8	11	6	10	6	11	21	15	10	24	20	12	10	13	9	16	12	15	11	14	13	22	10	16	7	7	20		18	14	11	11	11	7
20140122	0	127	111	141	139	119	109	125	91	65	157	104	142	169	123	133	138	140	72	65	90	76	69	98	112	34	26	70	106	104	186	141	136	130	154	99
20140123	0	220	200	209	231	168	254	219	185	161	267	194	202	257	306	256	363	288	143	142	209	129	209	131		138	135	174	401		331	250	239	193	260	284
20140124	0	260	241	282	271	286	263	287	302	211	311	243	247	278	432	366	324	340	232	228	303	225	258	367	237	183		169	462	336	315	274	261	262	255	272
20140125	0	45	35	47	33	65	33	82	195	21	51	59	71	57	41	41	45	31	16	43	92	76	7	58	8	22		53	265	102	205	43	38	53	37	41
20140126	0	34	36	39	30	33	35	39	47	30	65	54	67	42	26	38	48	33	57	61	27	39	39	34	47	13	5	21	40	39	72	36	38	38	36	34
20140127	0	115	114	137	130	102	102	150	151	132	156	168	162	164	196	108	106	98	133	139	75	94	98	113	107	96	72	66	106	141	206	134	122	135	139	92
20140128	0	8	6	13	10	6	4	11	11	5	9	16	15	8	17	13	20	6	13	8	15	20	7	11	8	5	5	17	13		4	9	9	9	8	9
20140129	0	66	54	76	71	69	68	86	90	101	81	107	106	117	70	69	66	60	70	121	51	58	57	105	86	85	54	36	56		181	69	64	67	70	62
20140130	0	195	174	187	193	207	193	179	180	165	193	186	190	219	254	200	248		167	161	276	189	196	260	138	35	162	193	424		245	215	193	187	190	181
20140131	0	122	139	166	247	152	144	162	184	171	171	148	179	202	180	113	123	135	124	174	225	98	211	158	160	131		73	98	80	137	182	148	185	163	101
20140101	1	66	56	57	72	43	58	68	22	25	83	77	58	130	159	111	79	22	26		91	62	51	30	25	24	14	14	116	122	181	87	68	56	85	46
20140102	1	90	88	80	119	139	147	138	92	21	120	58	47	89	126	176	176	76	118		68	66	63	112	35	42	35	73	182	157	294	119	118	100	147	166
20140103	1	184	139	147	157	166	189	175	57	25	173	24	20	229	145	238	200	145	37		218	118	93	114	34	26	101	91	306	245	323	186	148	171	152	198
20140104	1	82	85	81	93	81	85	112	118	111	131	148	129	138	98	87	58	42	75		47	73	62	102	42	23	49	25	84	90	186	96	88	81	90	79
20140105	1	152	147	143	150	143	178	184	181	129	156	156	169	195	164	238	237	239	226		162	163	162	189	145	122	123	52	305	326	248	175	160	152	163	164
20140106	1	132	135	112	136	137	118	130	133	123	140	144	142	136	137	130	137	128	137		151	136	134	110	85	90	127	112	185	124	133	167	161	123	142	113
20140107	1	185	160	184	170	163	175	200	226	164	206	180	168	211	230	180	186	215	218		229	239	197	202	195	156	178	132	271	219	212	180	163	178	168	224
20140108	1	15	9	8	13	8	13	19	12	15	11	15	13	15	12	25	12	13	7	11	14	18	7	22	10	10	8	3	52	12	19	9	9	8	10	7
20140109	1	24	16	17	32	84	40	25	18	20	25	19	22	63	58	23	81	29	27	18	114	33	53	70	24	30	12	19	100	92	106	18	20	21	27	51
20140110	1	78	83	64	124	63	73	56	72	38	85	49	53	107	124	117	90	50	46	38	84	47	47	78	51	32	21	66	101	115	140	94	91	59	104	70
20140111	1	99	112	92	163	104	97	149	163	42	162	87	69	167	219	263	244	160	99	51	135	86	70	106	51	35	25	133	293	271	155	108	129	103	155	149
20140112	1		16	20	27	17	14	20	18	10	22	10	15	22	23	19	36	23	18	11	12	39	10	22	9	14	7	27	133	101	124	29	22	19	16	10
20140113	1	74	72	69	131	58	60	69	87	38	96	59	58	109	101	101	71	78	33	32	47	42	54	93	26	20	20	63	79	107	122	87	81	63	98	53
20140114	1	153	175	135	187	126	176	170	155	91	198	123	117	192	309	367	279	115	69	89	151	69	52	174	24	3	18	150	422	253	208	148	147	120	161	202
20140115	1	117	110	112	124	139	110	116	172	95	160	106	89	215	191	213	173	140	75	75	102	80	58	104	66	37	23	102	182	186	197	126	126	110	145	101
20140116	1	598	539	596	618	511	561	589	163	423	685	640	602	618	595	588	537	482	347	544		175	192	119	161	203	51	385	510	461	521	637	585	547	592	519
20140117	1	254	251	270	262	254	257	298	304	321	299	315	375	209	268	263	279	331	352	347	326	341	398	342	310	322	385	240	198	246	271	295	258	266	274	237
20140118	1	182		333		21	83	355	17	6	392			375	370	377	350	116	12	205	244	141	132	44	18	15	113	101	358	348	354	383	350	285	363	94
20140119	1	137	136	130	154	143	143	128	155	149	128	200	177	156	143	155	102	80	126	190	67	113	94	129	139	132	108	51	159
20140120	1	5	6	13	7	11	16	11	12	14	18	13	11	18	14	20	17	12	11	10	12	4	9	7	12	7	3	10	24
20140121	1	8	11	11	10	9	9	12	33	9	9	20	20	14	10	11	10	19	16	13	11	26	23	22	9	19	9	21	19		18	6	10	9	9	8
20140122	1	136	132	152	139	141	118	112	111	63	204	82	72	134	140	138	143	150	70	57	92	75	72	110	85	35		73	109	109	193	145	158	120	172	120
20140123	1	244	220	221	259	257	296	215	185	153	310	189	163	270	351	300	356	259	179	130	212	119	222	133		147		180	343	246	269	269	243	224	257	289
20140124	1	268	239	259	274	276	262	279	295	206	286	235	240	277	383	323	320	266	228	219	248	238	254	328	261	165		173	494		292	282	266	253	258	277
20140125	1	45	35	47	33	65	33	82	195	21	51	59	71	57	41	41	45	31	16	43	92	76	7	58	8	22	8	53	265	102	205	43	38	53	37	41
20140126	1	27	29	34	28	20	31	39	65	40	52	40	46	37	37	41	71	38	52	45	32	49	44	48	36	21		21	58	48	72	26	28	31	29	29
20140127	1	101	97	150	115	106	101	149	159	116	200	151	140	187	172	109	109	91	154	120	78	87	97	135	108	102	72	65	111	152	218	116	108	127	128	92
20140128	1	6	8	10	8	5	5	16	15	7	14	13	9	6	11	13	26	8	12	7	14	21	5	7	5	8	4	20	20	16	11	8	5	11	6	15
20140129	1	71	58	71	63	59	64	86	79	91	74	107	87	121	69	66	68	59	69	118	50	68	74	88	80	78	55	38	61	73	191	73	67	61	60	61
20140130	1	200	172	181	187	187	193	177	184	132	192	194	188	219	237	205	209	193	182	163	255	184	176	196	68	17	148	161	441		269	211	195	169	185	176
20140131	1	279	345	293	556	333	426	378	361	231	557	787	441	523	408	178	294	349	237	394	644	185	999	295	165	129	136	85	340	318	189	422	456	441	408	308
20140101	2	70	53	57	80	79	68	81	21	15	94	50	59	124	152	120	90	21	26		62	65	65	20	27	24	21	23	133	135	235	92	76	59	93	49
20140102	2	127	89	100	114	165	169	145	95	31	115	55	55	97	132	170	298	54	157		58	52	48	106	45	41	36	84	210	155	295	111	127	121	153	198
20140103	2	122	110	91	134	87	126	80	30	17	91	18	26	63	194	215	169	112	29		202	108	85	82	27	28		80	270	242	300	135	112	82	128	142
20140104	2	76	81	78	88	74	71	112	100	106	95	150	118	130	108	96	55	39	64		46	67	64	119	46	47	53	22	75	101	180	94	82	82	95	77
20140105	2	151	145	141	154	146	170	188	191	140	158	148	166	175	186	237	234	248	155		154	150	146	212	139	102	115	57	275	322	246	160	153	152	155	238
20140106	2	143	137	106	135	137	134	121	118	117	137	130	137	124	138	173	134	123	145		153	142	129	118	105	118	127	120	162	147	146	163	149	111	149	125
20140107	2	184	156	195	175	174	185	203	215	171	216	178	166	210	219	189	216	180	234		270	213	190	213	197	158	165	136	277	257	215	190	194	179	174	213
20140108	2	15	7	7	17	9	6	14	14	12	15	14	13	16	10	21	13	8	12	12	14	15	11	8	7	6	7	8	33	10	19	10	10	12	10	13
20140109	2	16	19	21	29	87	25	25	13	17	23	21	22	86	22	27	64	51	31	17	114	27	39	57	24	23	19	14	123	86	115	27	22	16	19	27
20140110	2	65	76	56	100	68	63	72	78	38	84	48	35	72	132	131	99	47	39	28	79	53	40	90	41	35	28	67	121	131	123	70	74	62	93	61
20140111	2	91	109	90	169	148	107	151	190	46	148	75	60	174	259	261	251	117	107	47	113	59	46	115	61	39	30	126	312	271	143	113	129	116	170	177
20140112	2		12	18	20	12	13	17	12	13	19	13	10	16	21	14	36	15	17	9		9	7	21	13	12	8	10	44	28	117	21	20	16	14	10
20140113	2	89	85	65	142	99	74	88	86	39	94	61	32	121	125	132	84	71	28	24	47	35	52	94	24	26	22	60	85	123	120	103	101	74	115	67
20140114	2	99	159	116	155	119	159	165	156	86	134	101	123	179	309	354	288	82	67	66	150	58	41	164	19	6	22	140	397	277	223	124	118	103	120	175
20140115	2	121	108	124	120	161	125	134	180	90	162	114	84	205	194	204	241	103	68	57	105	75	43	105	58	36	19	104	240	212	211	122	123	127	133	168
20140116	2	593	534	595	607	530	580	499	170	394	649	650	610	629	635	569	547	468	370	553		211	197	103	155	259	72	406	492	456	541	640	583	545	599	523
20140117	2	251	236	248	253	236	250	271	336	316	283	262	303	211	263	259	201	263	337	292	268	357	369	374	311	302	411	204	141	230	225	283	251	250	256	236
20140118	2	24		142		17	34	185	24	6	387			393	365	383	330	108	12	232	239	150	132	28	10	18	82	72	361	359	353	378	345	43	357	28
20140119	2	135	133	140	151	127	129	137	144	142	151	178	156	146	158	154	71	68	124	189	64	106	105	139	121	134	103	49	109
20140120	2	8	10	9	7	9	10	6	10	7	13	8	14	10	12	12	17	9	11	15	9	3	3	5	4	4	3	12	19
20140121	2	11	8	11	11	11	13	14	35	17	12	22	14	14	11	12	13	10	17	15	16	11	21	26	11	18	6	16	22		14	12	9	9	11	8
20140122	2	128	132	123	150	148	136	118	117	65	223	72	82	103	157	150	135	111	69	46	89	65	66	120	85	43		78	132		209	149	151	127	169	168
20140123	2	268	246	249	272	287	325	229	211	151	276	168	146	222	344	341	336	183	151	130	198	119	191	156		153		182	381	283	274	263	273	242	273	280
20140124	2	264	245	257	256	257	270	282	288	219	274	220	222	267	338	274	304	253	225	205	234	228	229	315	292	166		170	512	379	301	270	253	238	248	295
20140125	2	31	36	45	35	56	37	73	138	21	57	58	59	92	88	39	42	22	28	40	133	64	10	132	8	18		30	277	146	252	37	46	43	53	52
20140126	2	29	25	33	45	28	23	43	62	39	76	23	32	33	40	33	70	45	48	39	52	53	44	40	42	36	21	26	77		47	41	35	33	43	22
20140127	2	101	92	138	101	105	104	146	169	108	152	139	132	158	127	112	113	91	106	124	76	84	117	140	120	103		69	116	146	204	107	96	112	103	102
20140128	2	8	3	8	9	9	18	13	15	7	9	24	7	10	12	13	25	8	9	10	9	31	7	6	3	8	3	18	24	15	7	9	7	10	4	19
20140129	2	62	62	70	70	60	67	74	80	89	73	104	91	98	68	68	66	57	71	113	47	78	60	104	78	74	53	39	59	77	194	73	67	64	63	63
20140130	2	216	172	159	183	171	196	173	200	6	182	140	60	215	221	202	242	141	190	29	278	181	171	57	19	14	143	137	352		291	204	188	162	179	183
20140131	2	374	263	240	358	289	361	255	321	257	410	554	462	368	221	272	325	251	133	353	202	127	333	159	202	134	140	78	272	428	512	250	296	424	269	300
20140101	3	71	64	64	89	82	83	95	20	13	106	40	51	96	188	150	100	18	26		102	36	43	27	34	29		34	159	146	224	93	89	67	102	57
20140102	3	175	99	114	110	119	160	118	95	34	116	38	75	69	172	162	281	46	109		47	50	43	110	49	33		88	192	147	293	130	114	108	167	188
20140103	3	32	55	37	55	53	44	44	27	28	121	23	22	26	100	65	118	92	26		189	100	63	59	30	36	76	63	198	235	251	57	47	31	62	33
20140104	3	69	73	71	84	69	72	119	99	98	88	128	121	110	93	85	61	44	73		47	61	61	117	53	70	45	29	76	94	162	87	76	79	93	75
20140105	3	150	139	143	147	153	247	196	187	133	156	141	178	182	182	213	183	210	152		203	145	131	198	118	61	110	57	251	318	242	156	149	157	156	256
20140106	3	126	138	114	124	119	142	117	139	116	132	117	125	117	162	182	131	135	143		150	136	127	119	126	122	125	116	148	151	147	151	146	121	133	130
20140107	3	174	157	210	180	194	179	225	215	158	210	175	175	212	247	224	194	179	222		263	201	179	205	182	175	159	152	281	210	236	187	212	208	201	210
20140108	3	14	10	12	15	9	11	11	15	12	14	18	10	17	13	15	13	12	10	13	13	13	7	12	7	12	7	4	28	21	17	7	10	8	7	13
20140109	3	11	13	14	31	58	16	15	10	13	20	17	21	52	19	27	72	51	23	14	101	22	30	55	21	23	15	19	99	83	131	21	18	14	21	12
20140110	3	62	66	69	138	64	87	102	83	33	84	48	45	57	112	138	144	44	45	31	81	45	34	95	38	44	20	78	118	128	127	83	69	83	91	98
20140111	3	130	104	150	185	200	225	181	186	52	145	81	63	125	199	260	273	76	114	32	113	48	47	106	43	36	33	121	321	263	171	114	124	171	170	239
20140112	3		14	20	19	14	13	14	15	8	13	12	10	18	15	14	23	7	12	6	5	9	6	20	14	16	11	5	22	22	16	16	14	17	15	9
20140113	3	97	93	92	114	81	78	100	108	43	70	60	63	123	143	146	111	58	28	34	43	35	42	103	35	34	22	61	101	139	117	91	97	97	112	100
20140114	3	96	102	88	154	85	116	134	161	54	112	98	101	136	248	247	237	29	39	58	136	42	34	151	11	26	16	143	396	286	175	91	90	68	109	110
20140115	3	144	109	134	132	176	173	148	179	87	151	95	79	124	181	176	317	79	108	51	104	68	40	119	44	39	29	100	266	224	219	138	122	137	139	215
20140116	3	597	526	496	605	538	581	268	182	365	655	622	548	633	578	578	527	461	377	519		223	184	96	150	307	77	428	457	455	519	650	588	458	593	524
20140117	3	248	227	255	251	241	231	253	331	260	269	264	285	239	245	219	130	208	295	230	240	289	300	322	303	300	355	191	71	158	218	275	243	236	251	190
20140118	3	16		19		15	17	96	21	11	341			386	371	382	361	96	14	188	210	129	124	13	6	15	36	61	368		368	275	332	13	340	14
20140119	3	115	112	134	123	113	105	147	133	142	158	153	136	128	167	109	70	61	104	185	57	94	97	135	117	125	89	59	80
20140120	3	3	7	8	4	7	9	10	5	3	5	5	14	4	9	10	10	7	6	5	5	4	6	3	7	4	3	9	14
20140121	3	13	15	14	14	11	15	15	28	19	17	17	18	16	11	12	12	12	18	14	9	9	13	38	17	20		10	18		20	11	10	15	9	12
20140122	3	153	131	138	150	140	163	121	122	67	185	64	73	152	154	155	132	88	63	45	96	66	57	118	68	62		84	138	151	219	150	146	133	166	178
20140123	3	296	247	250	262	277	301	234	209	149	236	165	153	179	317	378	348	168	152	127	182	129	166	147		148		180	379	274	283	279	263	259	279	310
20140124	3	256	230	250	248	261	264	261	287	211	270	216	214	278	312	267	285	246	256	201	224	218	213	285	238	178	201	174	471	379	322	272	247	245	245	267
20140125	3	26	18	36	36	35	38	70	136	21	95	55	48	100	136	139	117	14	20	40	72	51	15	97	9	16	4	21	269		290	33	48	36	48	47
20140126	3	29	25	22	38	25	32	28	66	32	43	31	31	32	37	36	53	47	48	43	50	45	44	41	40	47		21	90	51	41	38	25	20	36	26
20140127	3	107	85	111	113	96	95	127	162	99	126	133	126	133	100	119	109	97	101	116	80	85	119	153	114	107	73	75	105		188	120	91	101	98	99
20140128	3	12	3	8	9	6	11	11	12	8	9	15	10	11	10	16	15	10	9	13	9	22	9	16	3	9	6	11	21	12	14	8	6	8	9	20
20140129	3	63	61	64	61	57	66	87	83	86	74	113	86	89	75	72	65	70	85	84	45	76	73	102	101	76	49	40	65	78	160	68	71	61	66	59
20140130	3	135	162	113	166	90	142	155	196	6	90	17	9	236	213	190	268	68	42	12	347	171	160	25	11	6		127	276	266	372	180	174	104	166	161
20140131	3	279	198	293	246	226	241	350	299	311	248	420	336	302	236	271	208	181	124	406	156	152	289	153	120	138	133	56	250		525	226	224	303	208	226
20140101	4	82	71	65	92	124	75	95	24	24	111	39	38	64	143	143	104	22	28		133	29	34	25	32	29		51	138	145	172	105	102	61	106	86
20140102	4	158	100	101	119	135	149	110	95	41	120	37	59	69	203	212	278	46	98		37	44	42	103	35	28		77	201	148	309	146	126	100	148	178
20140103	4	28	24	29	32	30	27	34	33	35	36	28	31	26	35	26	68	70	28		118	85	47	41	33	49	55	49	89	148	135	40	31	28	31	23
20140104	4	66	64	75	75	66	70	90	95	79	95	122	108	97	94	76	64	44	92		46	59	83	103	55	71	36	30	68	101	123	82	75	86	87	68
20140105	4	155	132	148	152	146	219	176	187	104	158	154	155	200	179	222	168	162	110		145	145	120	186	77	40	109	72	233	281	254	160	145	156	147	192
20140106	4	134	146	112	117	119	130	114	154	108	130	112	119	127	166	165	142	137	136		155	131	127	112	134	125	131	119	154	151	152	149	141	116	128	119
20140107	4	190	170	212	190	206	217	244	218	152	205	172	164	218	236	209	220	171	229		183	192	183	194	178	183	159	151	294	214	219	188	194	227	208	214
20140108	4	15	10	10	18	8	12	14	17	13	14	16	14	17	7	11	12	9	10	14	10	11	4	9	11	16	9	8	30	20	13	9	9	10	7	13
20140109	4	3	8	10	16	13	13	11	7	6	14	11	16	94	14	21	45	45	23	12	71	16	27	66	19	17	21	13	97	75	102	12	14	8	17	9
20140110	4	65	71	70	106	43	89	106	88	40	59	41	57	52	114	149	169	31	71	28	70	36	26	89	40	45	19	66	111	127	124	83	73	50	92	86
20140111	4	190	102	182	199	157	233	147	150	60	135	56	126	131	219	248	356	66	97	30	100	49	41	108	37	38	26	114	312	256	163	176	147	165	175	232
20140112	4	17	14	14	17		13	13	12	11	14	10	10	11	11	7	16	9	14	7	4	9	5	26	13	14	3	7	15	14	12	16	14	13	13	4
20140113	4	101	84	104	92	72	99	82	116	44	69	38	61	128	164	158	155	51	27	25	44	34	31	93	34	35	22	69	118	145	135	100	94	75	92	103
20140114	4	49	59	49	77	54	67	109	149	37	70	74	72	114	115	202	231	17	22	56	123	43	36	103	13	27	22	150	328		133	62	68	42	71	61
20140115	4	143	120	144	145	79	191	162	182	82	149	94	120	141	156	161	347		118	58	161	68	36	124	55	35	26	93	277	218	214	163	136	162	134	206
20140116	4	603	529	444	578	535	608	368	216	466	440	391	368	646	546	565	529	373	303	483		187	142	118	155	333	84	438	442	452	480	624	573	474	599	549
20140117	4	205	182	233	227	195	167	260	260	270	255	239	254	179	151	133	70	91	307	240	215	242	203	285	287	305	242	183	57	113	222	219	201	216	215	124
20140118	4	15		17		16	21	70	22	14	86			370	381	382	227	104	13	100	184	85	93	16	13	22	33	40	381		327	74	139	13	227	16
20140119	4	115	97	113	107	104	106	148	137	145	140	158	144	151	145	102	74	67	92	160	65	94	89	118	109	119	83	77	92
20140120	4	5	9	5	6	5	6	4	3	6	9	6	7	6	7	9	21	4	6	5	3	7	4	4	3	6	3	3	12
20140121	4	13	12	16	15	16	18	20	25	13	23	27	20	11	17	13	12	7	19	14	8	15	12	42	15	20	8	11	18		23	12	13	15	13	12
20140122	4	150	139	127	140	125	170	118	128	65	123	56	74	106	154	159	187	74	56	39	94	64	54	107	55	60	53	100	142		209	153	139	133	160	172
20140123	4	309	255	253	277	250	303	199	208	160	230	145	157	169	323	344	320	164	150	124	180	134	156	129		155		181	374	276	276	310	279	255	267	300
20140124	4	229	225	247	240	261	230	274	286	224	261	202	236	240	312	265	267	228	255	204	243	224	193	267	236	170		171	397	379	326	250	230	244	239	243
20140125	4	19	35	24	65	30	36	63	109	21	95	55	48	100	136	139	117	14	20	40	72	51	15	97	9	16	4	21	269		290	33	48	36	48	47
20140126	4	20	26	20	31	20	19	25	65	38	33	42	35	36	25	44	50	51	44	37	34	41	30	46	47	55		19	112	48	47	33	29	21	31	20
20140127	4	96	87	103	107	96	96	116	158	91	115	129	115	120	101	106	104	109	122	116	92	84	102	134	103	98	66	93	108	117	165	115	102	97	108	93
20140128	4	8	11	8	10	7	11	11	15	9	11	10	13	7	7	14	13	9	11	12	26	17	5	22	8	11	4	9	29		22	7	7	9	10	21
20140129	4	64	58	64	64	64	71	86	76	72	78	102	85	79	76	70	76	73	90	73	46	73	80	105	101	79	52	41	62	88	135	61	67	64	68	66
20140130	4	73	49	36	70	38	48	109	188	15	7	10	7	109	197	164	165	60	13	12	265	167	43	11	13	14	131	60	294		378	66	69	46	72	67
20140131	4	199	136	222	156	151	194	255	254	349	179		266	222	261	193	198	120	150	353	135	124	290	141	158	137	168	54	248	201	244	154	160	197	159	169
20140101	5	93	85	66	84	89	83	89	23	10	106	55	36	54	131	152	106	19	25		77	34	36	26	30	32	26	40	142	141	175	106	97	69	95	95
20140102	5	126	114	99	124	74	138	104	92	48	112	46	57	110	167	260	236	67	130		59	45	35	95	39	32	32	54	168	144	279	141	137	82	130	167
20140103	5	30	25	29	37	35	32	40	39	44	35	66	27	31	30	25	40	47	31		40	73	19	43	39	45		28	47	60	24	47	33	30	35	19
20140104	5	65	66	74	71	67	65	72	98	67	91	112	82	105	82	70	70	44	72		44	53	68	115	58	78	35	33	76	98	104	75	72	85	75	66
20140105	5	152	140	128	143	171	160	162	195	57	152	144	145	190	192	211	174	133	63		113	134	112	181	38	40	101	73	220	278	237	160	145	153	147	147
20140106	5	118	132	93	111	113	130	99	154	106	123	114	119	140	144	161	143	143	137		149	136	136	115	133	121	130	119	165	138	154	139	127	104	129	116
20140107	5	188	183	219	186	185	203	243	225	201	216	175	178	197	227	203	211	207	207		188	188	159	199	177	190	145	155	273	216	218	206	187	218	197	182
20140108	5	14	8	13	16	11	3	12	11	14	11	19	14	34	11	13	13	8	13	12	10	15	7	13	7	17	12	12	17	15	14	6	9	12	10	13
20140109	5	4	6	8	14	9	9	9	7	9	10	9	13	65	10	11	31	34	21	11	59	15	31	66	18	15	24	18	103	51	99	13	9	8	10	9
20140110	5	58	66	41	93	37	82	85	87	39	81	48	57	47	118	151	174	30	121	26	70	27	28	73	45	42	19	62	120	150	119	60	61	45	95	73
20140111	5	170	128	177	252	114	188	133	147	74	161	58	119	134	246	253	365	57	96	43	95	43	29	99	41	40	32	113	318	258	184	150	155	144	175	195
20140112	5	13	8	10	16	14	7	11	12	10	14	7	8	21	9	11	21	3	13	7	3	10	3	25	9	14	5	3	14	16	9	13	9	11	10	9
20140113	5	90	80	77	155	73	98	66	145	41	88	38	57	118	168	174	166	44	28	20	46	31	30	79	33	31	20	85	118	153	139	89	116	71	134	104
20140114	5	35	22	31	45	32	28	95	147	27	33	67	52	73	93	122	220	18	22	42	133	33	31	75	12	22	15	160	274	332	139	31	31	38	31	38
20140115	5	130	114	138	147	72	161	149	183	86	150	94	114	130	165	187	305	46	131	37	116	57	27	87	60	36	35	100	256	213	224	143	136	94	142	166
20140116	5	590	508	578	594	521	596	442	217	490	429	365	376	642	559	585	516	418	290	474		216	132	121	186	339	101	377	451	447	471	603	552	538	564	529
20140117	5	116	111	159	150	121	100	214	248	227	168	148	209	100	66	87	55	72	268	229	192	141	191	296	279	272	202	153	52	92	222	131	119	151	156	74
20140118	5	12		23		15	16	51	31	28	283			343	394	374	84	76	19	33	180	78	71	26	14	22	14	36	397		264	30	55	14	134	18
20140119	5	120	99	111	106	99	115	146	122	136	127	161	141	160	122	106	91	63	85	152	69	94	84	114	107	124	85	84	100
20140120	5	3	3	7	6	3	5	5	3	3	4	7	3	3	6	7	10	5	4	3	4	5	4	5	3	8	3	6	18
20140121	5	16	14	16	19	14	16	20	21	16	17	23	14	18	20	15	13	13	20	8	7	22	11	21	15	15	6	10	17		35	16	14	14	17	13
20140122	5	112	133	125	138	114	137	104	120	76	138	43	86	70	161	180	190	69	60	34	93	67	55	107	53	64		96	142	134	154	140	138	108	145	147
20140123	5	273	270	238	278	217	273	172	192	185	252	139	157	198	318	319	261	169	153	130	218	134	148	127		165	143	211	321	309	245	288	270	212	272	272
20140124	5	216	209	243	243	236	223	277	280	225	247	214	222	234	268	255	247	221	249	200	282	228	186	267	220	142		182	338	375	289	246	228	235	233	212
20140125	5	19	35	24	65	30	36	63	32	22	110	55	49	66	161	193	179	34	12	42	264	43	10	30	7	17		30	266	187	286	63	56	16	88	48
20140126	5	17	19	22	30	19	23	25	62	29	43	24	29	27	27	35	51	43	42	37	23	42	32	52	42	49	21	20	87	44	57	20	23	19	29	17
20140127	5	94	95	95	95	97	91	114	155	89	111	133	101	104	94	104	102	111	103	112	98	84	90	145	98	104	80	89	103	109	145	106	93	96	99	91
20140128	5	8	8	8	10	11	14	12	18	10	10	16	10	8	13	10	8	8	14	10	9	15	6	28	13	9	5	9	24	12	29	12	11	8	11	22
20140129	5	67	55	70	64	67	69	75	84	62	79	95	75	84	76	68	64	73	86	68	51	71	77	121	84	82	56	44	62	93	124	72	63	68	64	70
20140130	5	23	21	28	32	31	36	86	133	12	11	9	7	17	96	62	59	67	12	6	72	151	10	12	10	8	99	44	287		353	34	30	33	28	53
20140131	5	163	120	169	126	122	157	171	220	278	129	179	242	172	183	169	161	164	149	343	122	128	270	135	167	145	245	56	147		225	137	127	148	139	126
20140101	6	92	80	78	84	59	97	95	22	21	103	48	39	59	132	143	121	21	26		107	27	37	28	30	36		41	157	143	175	107	98	63	102	107
20140102	6	121	117	90	119	86	140	90	109	45	105	57	55	69	234	237	167	89	88		58	40	43	88	36	34		51	87	154	205	128	137	83	129	138
20140103	6	33	24	32	37	77	37	44	38	39	40	32	32	36	29	31	24	41	35		31	66	17	45	36	46	32	22	41	32	23	46	34	34	34	23
20140104	6	74	64	63	72	74	63	66	94	78	85	104	81	97	92	83	78	47	58		40	51	68	110	63	70	33	38	80	89	94	73	67	80	75	85
20140105	6	131	122	118	101	146	137	133	194	43	96	112	101	178	186	192	135	112	28		94	129	98	169	34	34	100	79	203	246	209	144	126	136	117	127
20140106	6	105	117	94	110	100	124	97	157	100	118	122	118	126	145	154	137	133	133		150	141	137	115	131	124	135	118	149	144	141	121	113	98	114	118
20140107	6	172	175	193	199	175	191	230	219	207	228	172	200	193	234	227	173	190	189		188	186	155	209	179	185	142	159	243	212	203	195	190	187	201	170
20140108	6	12	12	12	20	12	16	13	15	13	15	17	14	18	13	15	17	10	11	14	10	16	9	11	7	17	7	17	13	13	12	15	9	15	10	12
20140109	6	5	4	8	14	10	8	8	6	6	13	7	9	57	11	11	25	43	16	7	74	15	22	56	15	18	14	22	59	21	100	11	8	9	10	9
20140110	6	42	51	42	66	25	76	59	101	40	109	46	40	53	109	148	131	27	88	25	84	27	27	60	44	48	22	63	135	170	123	50	53	38	70	68
20140111	6	173	133	152	222	94	178	114	137	81	176	97	87	90	208	285	309	43	95	37	120	42	32	94	34	39	28	107	325	248	193	146	144	110	179	188
20140112	6	10	6	8	14	15	14	12	9	11	13	18	9	20	13	11	15	5	12	8	3	13	3	22	4	8	3	4	17	14	11	14	6	11	12	8
20140113	6	75	87	68	191	35	102	79	113	39	81	31	28	79	218	184	183	38	37	26	54	26	31	70	37	28	18	102	122	151	141	89	126	63	181	103
20140114	6	32	26	40	44	43	52	94	153	27	30	50	48	58	103	128	205	24	23	38	149	35	26	52	26	20	22	167	277	306	114	26	24	40	25	69
20140115	6	95	105	78	98	70	121	145	169	93	153	98	109	120	190	223	343	39	152	49	107	49	36	92	40	32	35	98	228	217	221	110	114	74	117	129
20140116	6	555	486	548	560	475	566	478	226	481	536	395	459	477	541	545	498	412	265	481		207	137	145	212	258	134	376	451	450	465	583	534	510	551	508
20140117	6	87	90	100	96	89	67	142	222	171	106	91	122	84	63	83	57	61	184	151	168	106	173	280	227	261	188	132	53	63	191	100	94	101	99	59
20140118	6	14		19		16	18	30	30	20	411			317	395	384	74	41	22	40	34	76	41	30	12	26	11	25	412		236	19	30	19	101	19
20140119	6	131	109	130	115	87	121	133	118	126	128	175	136	141	116	117	104	77	83	134	93	92	79	114	111	121	85	81	105
20140120	6	8	7	5	4	6	5	6	4	3	5	3	3	3	7	6	4	5	8	3	3	5	4	3	5	4	3	3
20140121	6	17	14	18	17	14	14	19	20	15	16	21	14	18	16	16	12	15	22	11	13	26	12	25	15	15	12	11	27		66	14	16	13	17	13
20140122	6	89	120	110	103	116	97	86	110	75	136	42	74	58	186	190	186	61	63	34	116	69	51	83	51	73	58	91	151	132	154	104	117	99	119	114
20140123	6	252	251	216	255	191		169	174	181	221	140	150	192	276	294	252	165	162	118	195	143	142	132		177	149	191	298	323	186	264	251	194	254	262
20140124	6	210	200	228	221	215	204	263	279	205	239	228	227	218	235	251	225	214	247	193	240	218	187	242	221	137		211	334	393	294	216	212	217	222	186
20140125	6	24	47	9	22	13	29	13
20140126	6	25	21	24	36	19	22	22	62	24	34	28	20	30	32	37	56	40	42	33	27	38	25	39	43	51		17	89	65	55	35	27	24	33	26
20140127	6	97	87	98	96	108	97	115	150	83	107	120	104	97	94	106	105	98		115	104	87	82	141	107	101	81	87	100	111	119	99	92	93	93	98
20140128	6	8	13	12	10	15	11	13	23	8	9	12	15	14	13	11	12	7	20	13	25	25	8	23	11	7	5	4	20	16	39	12	11	12	14	16
20140129	6	73	61	69	70	63	70	69	72	58	77	78	63	67	75	71	64	75	77	83	51	71	70	121	77	84	58	49	71		97	74	68	70	67	75
20140130	6	17	14	22	21	18	9	49	70	11	9	9	15	17	11	21	31	92	13	7	16	139	10	12	7	6	72	29	248		355	16	17	18	23	14
20140131	6	109	102	114	134	117	121	123	221	166	137	167	176	147	142	135	114	194	125	287	121	115	266	134	148	166	244	33	126		174	119	107	117	119	117
20140101	7	74	76	73	84	31	85	88	21	28	90	62	44	68	134	144	131	21	32		66	23	41	26	29	30		38	155	149	147	106	129	27	105	94
20140102	7	168	111	130	141	166	173	93	120	52	138	67	60	114	210	170	97	71	85		77	46	45	74	40	36	30	44	85	163	208	137	139	136	138	151
20140103	7	32	29	32	39	35	39	41	37	39	41	31	28	37	27	37	32	31	39		19	63	17	41	34	34		15	39	33	21	50	36	35	39	27
20140104	7	82	63	67	71	73	71	67	88	79	73	96	87	100	87	80	93	53	58		45	45	60	94	62	67	35	40	79	83	95	79	76	73	82	82
20140105	7	107	93	89	69	122	125	115	186	41	80	54	92	181	133	143	120	104	33		94	123	100	174	28	25	101	80	218	235	223	104	96	107	89	122
20140106	7	104	117	86	104	89	109	103	149	100	122	122	117	130	148	157	145	149	133		144	149	133	121	126	123	134	117	145	145	137	122	123	92	132	120
20140107	7	177	170	178	187	188	186	227	215	205	227	181	211	199	236	214	180	162	195		207	179	136	203	128	131	142	148	241	211	183	188	174	179	190	192
20140108	7	20	15	13	20	12	9	14	16	15	17	27	14	15	19	16	9	12	11	10	12	14	9	16	11	17	11	18	15	15	20	17	10	14	15	15
20140109	7	7	6	7	13	16	8	9	7	8	11	9	10	36	7	6	22	31	21	6	66	12	19	50	16	17	13	20	37	15	105	8	6	13	8	13
20140110	7	33	43	31	38	23	47	49	102	42	75	37	46	63	120	132	110	25	78	26	80	31	30	59	41	46	18	72	142	192	115	37	35	33	57	54
20140111	7	145	124	110	187	49	166	106	122	73	145	61	74	107	185	279	181	42	73	30	103	36	34	73	42	43	26	103	349	270	187	136	137	74	163	167
20140112	7	15	7	14	13	16	8	16	10	12	14	25	12	21	9	11	39	3	15	11	6	13	3	21	4	16	3	3	20	10	12	13	14	11	14	9
20140113	7	57	93	71	144	35	84	75	122	41	94	43	34	89	190	198	190	40	47	26	66	32	34	55	35	46	24	112	140	158	138	81	99	71	180	96
20140114	7	49	30	26	35	43	58	109	150	39	30	67	73	63	117	192	223	57	23	38	157	35	27	54	25	13	14	145	268	262	120	33	38	32	30	73
20140115	7	53	87	67	57	50	87	122	159	91	163	93	94	136	187	229	308	39	172	55	116	56	37	88	33	36	34	105	236	225	209	64	90	65	113	74
20140116	7	494	459	455	484	398	547	445	245	407	481	400	449	441	521	571	457	419	251			214	118	191	227	146	128	349	461	466	468	504	473	423	501	469
20140117	7	87	90	100	96	89	67	142	222	171	106	91	122	84	63	83	57	61	184	151	168	106	173	280	227	261	188	132	53	63	191	100	94	101	99	59
20140118	7	15		17		19	20	33	34	21	380			222	435	336	76	18	19	34	12	72	36	30	19	26	9	9	423		234	23	44	27	354	22
20140119	7	124	130	118	137	106	110	115	105	104	138	157	131	125	113	129	100	82	112	109	97	87	88	112	108	119		92	106
20140120	7	4	5	4	7	7	3	7	5	3	9	7	6	3	3	8	7	9	8	6	5	5	14	7	4	9	5	10	11
20140121	7	20	14	20	16	18	10	19	20	11	19	22	18	39	24	17	30	13	23	11	12	24	17	22	13	18	10	10	23		61	14	19	18	23	14
20140122	7	87	98	98	95	75	88	104	93	72	113	53	70	68	209	174	150	65	74	33	96	70	57	84	57	83		94	156		138	98	101	103	98	104
20140123	7	211	232	199	230	173		176	199	179	216	142	152	176	269	268	261	174	163	126	204	146	139	132		177		188	280		156	245	238	186	241	251
20140124	7	210	197	235	208	221	195	271	279	209	256	219	199	235	251	227	214	196	284	202	243	192	185	222	202	134		188	355	402	303	217	204	216	210	182
20140125	7	9	15	11	25	6	21	15	16	15	13	55	27	88	177	164	118	8	10	52	289	22	7	32	8	15		73	269	196	261	12	15	9	18	26
20140126	7	20	18	17	32	16	21	26	61	22	42	32	25	31	29	39	56	42	42	29	24	40	22	45	40	50		18	83		61	25	24	20	30	42
20140127	7	97	85	93	89	120	93	120	137	88	97	133	118	92	98	104	123	100	148	115	111	91	87	145	113	106		86	98	113	126	107	95	102	101	99
20140128	7	13	9	16	11	18	16	17	33	9	14	19	16	23	19	17	20	9	10	16	26	20	13	26	10	10	3	15	17		45	14	17	15	18	17
20140129	7	68	65	69	70	70	78	73	79	64	77	91	67	63	74	72	65	76	80	98	52	72	66	118	70	84	57	51	66		87	73	70	67	70	78
20140130	7	12	12	29	14	13	11	42	33	8	12	8	8	10	11	14	31	80	5	8	19	93	12	7	9	12	35	16	110		353	16	24	19	25	15
20140131	7	99	92	99	95	93	111	126	125	160	122	203	137	130	105	95	120	154	123	245	108	86	229	125	148	158	243	29	149	192	140	98	95	94	98	106
20140101	8	51	72	47	76	21	65	69	37	19	94	65	44	89	143	128	161	25	27		102	24	47	25	25	33		45	140	140	142	103	102	37	117	61
20140102	8	119	83	133	87	118	112	163	91	72	119	87	86	160	134	125	72	96	78		70	53	52	69	49	34		43	90	172	134	102	89	153	104	99
20140103	8	30	26	30	33	33	38	38	34	37	34	31	30	39	26	28	28	29	46		14	50	16	41	32	28	18	13	46	40	23	44	34	34	38	20
20140104	8	78	64	71	79	73	84	68	88	82	70	105	95	105	102	84	120	66	63			51	55	77	67	63	33	47	80	86	112	85	85	88	84	92
20140105	8	90	75	71	60	112	88	140	179	41	66	65	91	184	118	126	121	97	31		91	123	101	176	19	21	101	75	171	237	240	89	74	85	77	120
20140106	8	107	115	88	116	84	117	108	149	99	131	123	127	132	142	154	151	151	134		147	161	130	132	119	119	128	121	141	146	138	130	129	98	139	128
20140107	8	181	167	174	183	175	185	227	207	158	212	209	202	212	244	204	181	142	139		212	182	119	212	70	71	133	136	278	219	203	194	178	181	192	184
20140108	8	19	18	11	21	14	10	16	14	17	15	19	15	18	18	20	19	11	13	10	14	21	10	23	9	17	10	18	15	15	15	13	13	14	17	17
20140109	8	11	11	8	14	16	15	11	8	4	8	8	10	17	10	10	19	41	22	5	60	15	33	57	18	15	17	21	34	16	104	13	9	14	18	14
20140110	8	28	31	31	43	29	50	48	103	40	64	37	50	69	116	101	112	25	89	27	78	35	52	60	60	40	20	69	161	184	87	39	36	36	50	60
20140111	8	99	116	69	160	39	118	86	233	66	115	47	85	126	215	223	192	36	80	50	102	46	38	60	43	52	26	102	387	273	176	113	124	44	151	142
20140112	8	14	11	13	17	17	13	17	13	10	17	23	11	23	20	19	61	5	14	20	12	16	7	17	8	18	4	9	23	11	20	16	12	13	16	17
20140113	8	60	79	64	195	45	87	77	129	42	103	48	33	110	190	215	184	37	44	36	75	47	28	66	33	44	26	109	145	164	131	74	169	52	210	99
20140114	8	128	95	55	134	72	114	80	139	33	30	69	61	69	175	178	249	95	27	37	157	33	30	55	20	18	14	135	274	225	92	128	127	48	125	107
20140115	8	51	55	62	52	46	68	110	159	81	152	85	57	120	173	256	269	50	147	56	144	53	49	99	31	41	31	88	230	231	212	56	55	62	111	65
20140116	8		403	417	425	383	445	403	230	395	431	421	408	429	488	547	484	408	264			226	108	154	241	110	140	330	473	456	469	455	415	392	420	396
20140117	8	73	72	76	83	74	63	120	111	109	96	72	91	59	76	66	56	57	85	105	123	104	93	250	149	241	108	88	54	50	94	75	71	84	91	57
20140118	8	20		26		29	27	38	44	14	302			125	512	330	68	18	21	38	16	51	48	52	17	24		7	388		243	25	43	30	258	35
20140119	8	134	133	104	144	116	114	108	104	89	120	136	104	125	166	144	105	87	143	101	97	96	88	116	131	115	85	94	107
20140120	8	6	11	5	10	7	8	8	7	8	7	9	6	3	5	9	17	7	17	6	7	7	6	16	3	12	3	13	23
20140121	8	21	17	19	19	19	22	28	39	13	24	22	26	41	37	22	40	8	15	18	16	33	16	48	11	17		11	40		64	19	16	21	21	17
20140122	8	81	79	96	79	74	85	115	107	77	113	71	73	74	217	150	161	52	128	37	98		59	86	54	76	55	90	157	132	138	77	77	91	86	85
20140123	8	195	207	190	197	179		174	193	177	204	156	147	164	229	260	240	198	177	122	224	148	149	146		175	145	201	284		162	205	199	177	207	206
20140124	8	207	190	219	208	223	197	260	270	213	260	201	204	238	237	228	211	180	288	217	275	181	191	242	74	100		193	392	379	288	218	211	211		193
20140125	8	9	15	10	12	8	9	20	14	13	11	28	18	97	161	43	31	10	11	36	247	28	3	69	5	16	9	86	270	217	252	10	9	11	15	13
20140126	8	17	24	20	27	18	24	24	62	25	43	39	28	41	31	46	75	45	46	36	25	40	21	65	48	49		17	89	54	59	25	29	23	33	28
20140127	8	114	95	113	93	123	98	120	140	94	108	125	118	103	118	104	127	124	135	115	109	96	96	132	114	113	75	82	96	103	128	116	102	113	99	113
20140128	8	10	10	15	20	18	10	24	32	7	33	30	23	30	29	22	22	13	15	23	23	22	11	35	11	11	4	65	32		51	23	22	14	22	21
20140129	8	69	69	68	73	72	71	79	86	67	78	98	69	69	83	75	65	82	86	94	55	70	68	114	80	110	62	45	73	86	75	69	63	71	73	74
20140130	8	9	9	12	11	11	7	14	16	6	10	9	4	14	10	15	33	30	8	9	20	52	11	8	6	9	24	17	32	283	351	11	28	15	21	30
20140131	8	95	83	93	84	101	108	94	145	128	90	155	104	116	88	126	187	136	91	235	126	99	241	136	153	149	188	29	151	220	121	87	85	93	93	110
20140101	9	46	66	25	109	38	47	67	26	22	109	65	26	117	157	155	154	33	33		90	38	65	22	26	24		45	164	145	139	109	113	34	132	43
20140102	9	74	75	93	92	117	81	176	130	113	101	116	119	133	107	101	95	114	114		68	52	64	85	66	44			80	158	111	104	95	76	101	81
20140103	9	26	21	28	32	29	26	41	35	26	32	41	29	44	28	30	24	21			18	35	16	48	27	34	23	15	46	50	31	41	32	31	34	21
20140104	9	91	78	97	98	85	96	81	91	84	94	117	89	141	132	98	149	81	95		65	66	64	144	87	67	35	52	97	114	129	106	100	105	104	102
20140105	9	89	69	62	58	121	87	128	173	32	57	74	58	74	47	122	134	105	26		127	126	114	159	40	21	102	63	159	270	253	89	72	85	62	117
20140106	9	108	124	89	131	98	142	107	156	102	136	130	133	145	138	150	160	150	138		150	169	126	125	121	112	130	125	155	151	153	137	137	98	146	147
20140107	9	163	158	172	174	163	175	239	203	79	204	211	197	218	236	201	172	138	52		195	189	103	223	49	23	132	127	316	226	208	179	165	175	175	164
20140108	9	17	15	16	27	12	13	19	19	20	19	14	19	20	18	21	24	15	14	18	12	23	13	32	11	20	17	18	18	22	36	16	12	14	35	13
20140109	9
20140110	9	30	30	32	45	32	48	79	109	32	74	51	52	66	158	78	121	27	96	35	125	48	47	68	59	41	21	60	192	201	95	43	38	41	59	51
20140111	9	71	102	44	121	43	83	69	218	67	123	65	82	151	237	226	265	30	127	66	168	50	47	70	60	55	28	102	406	283	199	88	103	38	198	98
20140112	9	12	12	11	18	11	25	16	31	13	16	52	17	27	21	24	27	7	14	40	13	36	9	28	8	17	3	15	35	17	25	14	14	16	14	27
20140113	9	80	127		157	55	95	71	131	49	100	77	52	79	221	226	201	42	86	35	92	54	50	76	46	48	30	108	157	175	123	69	132	50	214	112
20140114	9	156	122	117	175	93	149	73	150	26	121	90	47	132	161	198	270	78	45	49	158	38	49	89	19	22	20	141	270	209	100	143	133	105	142	132
20140115	9	50	55	56	54	41	63	97	179	69	146	75	54	102	190	248	182	42	173	61	160	55	61	89	38	46	38	88	259	227	219	61	57	50	128	57
20140116	9	447	385	418	423	389	442	349	234	396	425	402	420	416	462	506	483	413	289		414	240	131	188	234	86		326	488	460	436	453	400	391	412	412
20140117	9	75	69	78	75	71	72	130	78	120	97	80	103	70	75	70	63	60	81	114	113	94	90	251	123	202	84	90	56	56	63	80	78	85	91	63
20140118	9	28		33		36	31	36	66	22	157			108	426	495	62	25	24	42	82	40	60	91	21	27	5	8	386		246	36	44	37	190	36
20140119	9		138	133	124	116	118	105	102	89	120	116	92	119	150	143	136	91	151	110	122	103	104	146	137	127	102	103	118
20140120	9	5	12	7	9	10	9	8	8	6	9	6	4	6	7	11	20	8	15	9	12	5	9	13	4	11	3	7	24
20140121	9	20	15	17	20	20	20	25	44	9	28	22	26	68	48	36	33	17	19	25	31	30	31	56	13	16	7	23	66		100	17	18	21	22	17
20140122	9	82	72	85	73	65	88	122	119	76	111	67	87	104	228	141	168	57	126	42	136	77	67	81	87	70	43	81	199	148	145	81	73	82	78	90
20140123	9	181	180	178	184	178	200	184	194	176	193	161	154	173	234	255	242	167	187	124	205	155	159	206		155		194	290		246	196	185	176	189	198
20140124	9	215	197	237	217	206	196	254	268	206	245	231	210	237	238	231	219	196	282	225	268	187	193	247	62	90	144	221	404	360	272	223	208	210	241	193
20140125	9
20140126	9	28	47	29	27	21	29	27	70	26	49	35	36			46	75	45	46	36	25	40	21	65	48	49	19	17	89	54	59	25	29	23	33	28
20140127	9	115	102	113	111	121	123	118	146	94	119	132	115	126	110	118	105	125	132	112	127	97	110	150	123	121	80	83	108		133	121	113	112	104	156
20140128	9	18	26	23	28	21	17	28	40	19	34	34	31	30	41	33	50	13	20	41	64	25	22	62	15	15	7	48	77	44	61	26	26	27	31	28
20140129	9	74	56	78	71	83	66	90	106	70	79	118	89	75	82	83	91	79	99	100	80	71	80	132	93	103	63	59	81		83	81	77	80	77	95
20140130	9	7	7	11	6	12	26	24	32	8	15	14	6	13	14	18	53	18	13	13	25		7	21	6	7		16	33	282	334	12	11	15	26	56
20140131	9	104	78	83	87	98	118	80	160	119	88	110	95	158	89	150	160	144	122	217	256	249	258	187	156	144	154	31	144	182	162	111	95	76	97	119
20140101	10	44	53	25	137	33	37	47	23	21	134	86	26	111	200	167	94	74	29		140	45	78	23	42	26		43	211	160	153	94	115	24	185	66
20140102	10	74	68	72	80	119	82	152	3	109	104	131	3	136	79	93	104	116	180										80	158	111	104	95	76	101	81
20140103	10	28	23	23	31	32	25	41	36	35	37	31	27	41	27	28	34	24			26	25	14	50	28	30	18	25	37	37	26	45	28	28	34	18
20140104	10	119	104	106	118	92	109	83	116	87	144	125	95	141	135	111	162	99	85		75	73	77	141	110	79	39	55	169	159	144	124	114	108	140	130
20140105	10	110	57	47	51	80	91	97	227	40	52	77	56	57	35	128	138	94	22		100	123	128	86	20	21	99	61	163	223	257	61	57	63	50	98
20140106	10	108	127	108	136	111	142	112	163	107	150	123	122	138	143	150	162	151			158	167	120	122	126	118	142	133	159	157	130	135	133	108	157	150
20140107	10	147	131	104	149	154	168	180	134	43	147	229	195	232	271	186	142	133	26		200	186	83	127	32	21		121	222	273	288	152	130	146	150	160
20140108	10	14	16	15	26	15	14	21	21	17	21	24	19	14	21	19	23	16	14	8	17	22	10	32	13	22	13	23	21	28	49	15	17		38	21
20140109	10	13	16	10	9	21	20	17	21	8	7	16	11	34	11	12	24	43	19	4	106	48	55	32	16	11	23	22	27	24	113	23	7	18	24	12
20140110	10	30	35	39	58	48	48	85	113	54	72	58	56	106	203	63	94	34	112	42	97	44	55	107	61	39	24	58	150	243	131	44		49	57	40
20140111	10	54	78	43	139	44	76	75	184	70	120	86	80	130	282	194	273	69	139	56	195	47	54	119	71	60	27	131	492	284	183	76	93	47	188	76
20140112	10	19	14	15		14	21	24	32	14	16	27	17	29	16	24	19	9	16	37	17	38	8	56	9	16	10	5	36	19	38	20	15	15	20	22
20140113	10	80	162	65	106	59	115	79	145	71	94	89	72	100	196	251	159	51	93	34	118	52	47	107	79	49	31	108	195	186	162	72	94	59	189	107
20140114	10	149	131	109	194	130	173	100	132	28	152	181	68	196	179	222	286	74	115	58	197	47	52	120	17	23	15	137	320	214	156	155	144	119	145	191
20140115	10	50	55	52	54	44	60	97	178	87	152	104	50	105	271	235	81	79	216	62		56	49	117	78	53	50	84	318	248	207	64	58	46	78	52
20140116	10	423	385	405	420	396	449	362		401	429	378	394	414	454	481	421	297	298		450	276	161	199	177	62	141	331	512	476	440	441	404	371	404	423
20140117	10	87	80	89	89	70	75	146	84	106	110	96	105	80	82	73	72	69	83	137	117	96	76	231	112	82		95	57	61	63	91	79	106		69
20140118	10	44	38	32	29	39	28	37	64	34	110		50	69	513	486	49	22	26	44	94	51	64	104	22	31	9	3	387		296	43	34	34	111	30
20140119	10	140	132	126	143	120	119	116	134	101	135	113	100	109	170	151	150	103	144	134	125	109	120	176	182	142	91	102	140
20140120	10	7	9	11	6	14	8	6	7	4	10	5	7	3	10	10	17	3	12	7	11	7	8	12	4	5	3	22	16
20140121	10	19	16	22	17	23	19	24	61	19	47	30	33	99	77	35	27	14	19	35	25	36	36	68	17	19		23	61		95	20	14	21	22	19
20140122	10	83	80	85	82	65	85		116	77	123	78	85	85	226	120	172	59	170	43	154	88	71	134	91	74		92	267	160	135	88	77	76	79	87
20140123	10							189																			145
20140124	10	182	185	196	195	180	195	242	277	216	243	238	228	242	220	230	216	196	301	235	232	207	122	269	64	64	135	222	372		310	214	203	186	199	175
20140125	10	10	12	12	12	16	14	16	19	16	17	23	16	45	17	13	18	14	11	11	88	23	6	32	5	14		69	97		269	16	13	13	11	10
20140126	10	32	50	29	27	24	27	32	76	40	52	46	51	60	24	34	109	68	33	55	43	55	29	96	30	52		31	104	62	80		51	26	37	26
20140127	10	125	103	125	119	134	138	127	178	115	127	141	126	149	107	148	108	116	150	123	134	133	120	171	137	135	92	90	160		154	134	117	127	114	142
20140128	10	21	25	30	32	20	20	27	38	20		39	42	20	53	32	71	19	31	41	50	52	32	85	26	15	3	22	73		62	26	26	27	30	18
20140129	10	79	70	77	85	100	82	97	118	69	81	115	87	74	98	85	96	149	100	103	92	87	120	168	98	109	76	82	107	89	102	88	80	82	79	85
20140130	10	16	11	11	9	12	19	11	12	11	11	13	11	13	11	23	29	20	8	10	13	43	6	27	9	7	21	21	33		414	20	12	11	14	34
20140131	10	87	86	70	81	73	90	79	116	107	76	107	114	111	84	137	156	161	133	175	286	212	261	166	145	143	128	43	147		161	92	90	71	94	84
20140101	11	29	32	19	99	25	30	28	21	18	98	63	22	102	261	154	109	45	25		139	58	103	17	29	26		74	167	173	145	45	71	20	109	22
20140102	11	104	78	91	76	130	82	135	3	94	88	125	76	159	86	84	108	92	123		101	118	64	94	105	57			106	98	109	91	78	110	77	80
20140103	11	28	20	26	32	24	26	41	30	36	36	24	33	31	3	21	29	24	27		23	12	15	37	29	27	12	16	26	30	30	40	28	33	34	13
20140104	11	125	129	114	135	106	135	98	128	93	166	109	98	141	175	137	175	109	100		92	88	82	152	93	84	61	64	192	146	154	142	132	117	156	134
20140105	11	133	38	38	32	71	112	63	183	36	46	50	45	46	35	100	90	94	21		75	162	71	80	19	19	104	60	110	62	215	43	40	32	42	112
20140106	11	120	128	97	122	99	111	110	163	113	144	3	130	141	135	3	165	160			165	181	118	125	137	124	155	133	168	3	118	139	141	102	160	142
20140107	11	117	99	40	87	116	121	24	14	29	39	178	43	247	161	132	94	119	22		221	137	51	148	30	23	3	107	113	235	275	117	101	76	111	134
20140108	11	15	18	20	29	17	16	18	14	23	24	12	15	13	14	21	22	15	18	8	15	18	10	29	16	25	13	10	19	21	10	19	17	20	41	18
20140109	11	19	13	108	14	21	19	16	6	6	9	8	4	58	10	15	18	26	11	3	63	46	42	39	9	12	15	27	3	23	83	20	17	25	41	14
20140110	11	34	39	50	63	62	45	72	81	77	98	53	58	100	155	69	69	40	171	43	144	36	40	95	63	38	33	104	163	263	115	44	42	58	65	60
20140111	11	62	58	52	111	50	73	70	173	77	107	64	74	151	321	202	155	71	148	62	185	47	45	129	92	69	31	151	322	390	129	63	78	56	128	72
20140112	11	13	13	15	21	16	21	18	11	11	16	18	16	24	11	22	14	8	15	9	6	14	6	37	10	16	4	3	25	16	26	20	13	16	17	20
20140113	11	106	170	78	124	73	109	87	162	81	3	97	90	126	241	235	139	64	90	46	126	39	43	97	76	59	35	188	220	227	169	105	159	75		102
20140114	11	92	132	86		123	204	81	52	30	195	165	54	185	194	216	230	36		43	183	29	28	69	18	27	17	142	316	178	178	136	134	78	145	209
20140115	11	50	64	58	62	49	54	74	177	85	118	144	82	121	193	152	84	61	204	63		55	42	98	80	54	41	95	271	302	171	63	62	56	72	51
20140116	11	440	382	422	423	418	439	373		394	431	402	392	426	423	441	463	255	313		458	295	165	147	56	42	135	337	457	429	410	446	402	396	412	376
20140117	11	103	88	174	111	87	84	145	103	124	141	125	137	102	98		77	80	112		124	102	86	257	137	23	79	113	65	72	67	115	100	162	106	74
20140118	11	28	33	33	31	40	34	36	40	32	67		47	60	354	189	46	12	25		110	52	28	55	20	22	3	10	286		402	43	34	29	34	40
20140119	11	139	147	140	152	123	128	127	115	103	137	117	107	117	165	169	135	113	137	131	152	118	131	158	153	147	99	105	146
20140120	11	9	9	8	7	9	11	6	8	11	7		9	4	8	10	6	5	11	7	4	6	7	10	4	10	3	9	8
20140121	11	20	19	24	21	23	21	27	40	26	44	49	38	63	39	26	27	20	17	35	13	35	16	36	16	14		15	34		85	27	24	25	34	19
20140122	11	99	81	84	79	73	94	88	114	107	93	93	89	110	206	114	167	70	136	50	207	83	67	127	86	83	47	141	241	176	105	97	3	79	84	93
20140123	11	208	199	191	206	191	262	203	213	224	208	175	176	192	221	240	255	169	215	128	234	219	170	160		126	143	204	300			215	208	189	207	225
20140124	11	181	182	184		188	178	253	298		226	237	225	257	249	215	220	184	290	242	246	167	91	337	102	43	126	211	299		306	191	176	179	178	181
20140125	11	6	10	14	8	9	14	16	19	16	17	23	16	45	17	13	18	14	11	11	88	23	6	32	5	14	10	69	97		269	16	13	13	11	10
20140126	11	27	30	31	22	24	28	35	57	40	41	45	48	50	32	36	66	55	49	56	32	54	24	82	48	49	21	27	72		55		34	24	25	23
20140127	11	133	127	143	133	137	118	148	160	139	131	130	141	134	113		132	115	167	131	152	132	119	180	153	148	99	99	165	132	162	141	127	143	132	103
20140128	11	18	22	24		17	13		43	22			27	27	35	42	56	60	32	25	20	56	32	74	21		7		64		54	28	21	19	27	16
20140129	11	89	87	89	93	92	100	96	123	74	86	94	80	89	90	102	119	105	81	98	108	87	108	167	3	108	71	115	124	101	92	101	87	86	86	92
20140130	11	19	10	8	15	16	18	14	9	8	10	8	13	18	12	19	13	17	6	9	5	18	3	20	8	9	14	8	26	103	390		14	12	13	15
20140131	11	78	68	68	69	61	68	77	103	83	78	93	79	88	82	100	147	147	133	136	150	186	187	153	139	150	137	56	145	103	104	86	77	62	78	60
20140101	12	34	13	23	32	23	22	27	19	27	57	55	22	54	155	45	63	27	31		87	104	66	24	23	26		44	87	177	79	28	24	23	32	15
20140102	12	108	82	94	85	100	90	145	56	89	90	114	112	123	92	89	107	86	85		3	127	73	81	128	49		3	107	95	126	96	88	93	92	78
20140103	12	25	20	3	26	25	24	32	24	26	32	22	29	34	3	18	28	22	25		11	18	9	44	27	25	12	9	17	26	22	37	22	25	27	16
20140104	12	130	145	124	138	133	150	117	103	97	148	120	101	157	195	183	172	108	92		80	107	82	109	90	83	76	68	133	140	146	148	152	131	158	140
20140105	12	66	40	18	33	82	66	26	44	31	29	37	38	45	26	67	71	65	26		65	86	28	65	21	20	62	36	44	57	119	41	32	19	38	59
20140106	12	135	133	106	114	105	125	127	141	120	140	3	126	124	129	3	3	158			157	195	127	129	151	122	170	90	167	3	113	135	124	109	123	134
20140107	12	58	48	24	3	18	90	19	17	12	24	26	18	202	46	88	85	55	24		230	24	24		26	29	3	101	46	169	196	3	35	3	31	75
20140108	12	21	14	22	30	18	16	15	11	10	25	11	16	18	14	22	22	13	19	11	13	13	10	20	15	19	12	9	20	17	3	26	20	14	12	14
20140109	12	17	17	20	27	13	12	9	7	3	8	20	6	45	6	17	15	8	9	8	20	31	19	28	9	12	15	14	7	18	76	24	20	17	14	15
20140110	12	3	38	54	65	54	58	76	79	77	75	62	65	63	147	71	79	48	123	48	111	37	35	93	38	31	27	96	151	213	79	51	47	53	68	52
20140111	12	62	60	57	134	56	70	74	149	81	111	93	83	148	350	223	167	68	131	60	150	55	37	113	123	58	29	151	301	407	174	75	90	68	151	75
20140112	12	12	9	19	14	12	14	16	11	9	13	8	11	27	12	22	21	8	10	3	4	9	3	21	6	11	4	3	16	22	12	15	14	14	14	11
20140113	12	106	128	71	113	87	91	71	92	85	3	111	88	132	303	192	144	84	72	3	156	38	44	74	89	70	38	172		253	187	93	104	69	3	99
20140114	12	98	68	63	98	93	122	65	35	28	214	186	71	184	182	198	175	23		51	170			40	17	17	12	92	240	176	143	85	96	59	154	151
20140115	12	49	55	57		49	44	59	98	77	107	144	85	133	157	110	109		219	82		43	40	84	171	61	29		203	322	170	60	57	48	63	43
20140116	12	425	386	389	409	422	421	382	306	292	370	340	371	420	396	423	424	203	300		467	223	155	131	43	37	123	347	436	403	399	432	391	395	405	377
20140117	12	124	128	162	151	100	103	160	135	158	183	171	166	144	165	93		89	105		134	114	114	167	72	15	89		82	99	111	150	134	132	146	93
20140118	12	38	42	40	106	35	57	38	33	27	88		44	200	267	181	36	9	25	34	68	22	41	37	22	29	13	3	119		514	43	102	36	173	52
20140119	12	155	154	161	165	143	151	153	120	115	167	125	125	122	166	182	140	121	167	146	163	132	147	169	149	109	129	147	156
20140120	12	11	10	8	6	9	6	9	8	4	7	4	8		3	12	14	7	15	7	5	5	9	10	4	17	6	3	9
20140121	12
20140122	12	104	92	86	88	86	104	93	105	95	94	93	89	108	132	122	166	58	122	62	153	91	59	131	103	100		115	237	165	98	109	94	80	96	98
20140123	12	214	212	201	213	208	210	203	210	191	221	191	195	197	226	257	266		229		327	203	169	170	203	128	143		294			230	212	192	221	188
20140124	12	152	153	178		163	159	242	273		232	222	198	253	217	167	194	190	293		290	151	63	285	198	28		264	263		269	181	168	167	161
20140125	12	9	9	13	12	9	13	15	12	18	13	13	13	14	11	13	14	12	13	7	6	10	6	46	8	14		8	23	95	159	7	10	9	14	9
20140126	12		22	29	30	25	29	29	60	45	33	38	39	47	27	32	37	46	59	53	23	48		57	59	52		24	47		48	17	26	26	34	27
20140127	12	114	135	152	135	133	118	154	143	136	150	141	136	131		99		124	176	129	148	133	105	188	151	154	106	126	140	128	159	141	137	145	134	110
20140128	12	51	47	55		48	51	31	26	32	33		43		46	55	62	63	32	30		49	38	48	31		29		46		53	64	53	43	58	40
20140129	12	105	92	102	106	109	105	120	114	90	101	91	90	101	104	119	146	115	95	97	141	93	101	142	3	117		146	155		96	104	98	102	102	105
20140130	12	21	14	15	20	13	18	13	5	6	19	11	8	21	18	16	12	9	9	10	6		4	16	7	12	7	3	13	23	176		17	12	23	12
20140131	12	63	64	66	68	59	62	73	95	69	76	70	69	80	68	79	114	129	130	138	149	119	116	153	144	132	113	155	139		85	80	72	63	76	59
20140101	13	28	18	22	20	22	18	24	22	23	26	44	25	39	44	23	21	19	31		47		45	27	27	26		20	39	88	64	35	19	23	22	18
20140102	13	101	99	95	103	110	99	160	96	105	105	126	115	103	88	100	90	79	91		3	81	83	74	95	32		59	114	109	149	108	103	104	109	92
20140103	13	21	20	9	25	20	23	24	21	24	25	24	26	35	10	19	28	17	22		10	18	13	31	22	32	8	10	14	17	24	31	21	21	21	13
20140104	13	147	156	142	157	142	163	137	103	119	159	128	115	191	183	195	171	140	107		88	117	99	98	99	80	80	81	112	154	175	159	164	156	167	147
20140105	13	33	27	16	41	37	30	25	14	22	27	31	28	64	30	42	37	42	23		42	70	34	46	16	20	33	17	32	58	92	39	33	21	37	28
20140106	13	119	113	114	125	113	140	147	134	125	144	99	145	3	112	108	3	157	179		156	194	137	131	160	128	159	88	133	70	126	130	118	121	137	130
20140107	13	31	22	23	3	20	75	22	16		24	17	20	33	21	65	48	25	23	14	65	31	13		3	23		18	25	59	170	3	17	3	21	60
20140108	13	19	16	15	24	18	22	12	12	8	13	11	14	15	18	16	21	14	18	11	12	16	8	22	16	19	11	11	20	19	7	17	15	15	13	16
20140109	13	4	10	10	11	13	7	4	4	3	8	28	6	45	21	16	16	9	15	3	11	15	17	15	9	10	8	11	3	29	51	14	12	7	12	6
20140110	13	36	37	47	58	56	60	62	46	58	61	61	74	85	111	70	78	42	29	58	93	30	33	70	24	31	21	53	92	204	71	49	38	56	52	56
20140111	13	68	122	84	253	61	79	92	117	75	122	96	81	154	220	197	185	72	131	72	149	51	38	91	130	42	26	119	278	367	163	129	209	68	183	75
20140112	13	10	5		20	11	13	14	6	7	13	8	6	20	8	12	12	9	11	5	5	12	3	14	6	16	3	3	10	15	36	14	13	13	14	10
20140113	13	74	95	60	72	79	82	71	3	63	48	138	54	174	211	150	138	64	74	37	133	40	44	65	81	68	43	134	241	251	144	68	57	60	51	88
20140114	13	82	75	65	252	65	121	70	39	38	172	178	120	183	164	211	130			79	109		4	39	12	10	7	62	172	114		67	66	55	203	92
20140115	13	52	44	53	42	44	45	58	67	63	64	111	85	154	144	83	84	62	189	103		35	31	62	178	58	24	56	228	363	196	51	51	49	53	35
20140116	13	285	269	293	266	288	350	335	375	219	256	234	308	301	355	389	375	235	28		471	199	133	73	27	25		389	415	363	397	258	253	311	265	311
20140117	13	73	154	116		85	77	124	104	166	201	219	169	234	204	174		104	27	121	133	123	133	22	17	16	95	114	127	135	160	112	166	90	188	68
20140118	13	123	265	121	223	42	59	81	31	45	285		114	144	124	229	27	8	29	90	28	14	12	32	22	16	6	11	86		278	209	265	79	214	44
20140119	13	173	170	181	183	162	174	175	136	141	184	142	142	140	187	206	161	129	186	157	177	165	163	160	174	73	146	160	175
20140120	13	6	10	11	9	12	11	8	7	11	7	10	10		5	9	8	8	17	10	11	5	12	5	3	17	6	4	14
20140121	13	35	32	45	38	23	19	40	25	35	49	60	54	55	57	29	26	18		47	11	21	6	26	12	16	8	14	34		69	43	34	32	36	17
20140122	13	113	106	96	94	96	100	101	107	99	107	88	85	103	119	134	171	69	108	89	137	65	55	114	124	100		130	210		93	116	102	94	96	98
20140123	13	217	202	216	219	223	205	219	231	179	218	209	197	210	220	266	284		270	189		193	185	159	217	139		102			145	229	211	209	219	193
20140124	13	108	77		76	153	117	199	269	76	150	202	184	198	130	107	119	175	231	232	271	156	50	212	179	21		266	140		281	119	98		126	69
20140125	13	9	9	13	12	5	23	14	9	10	16	17	15	13	8	21	9	9	17	9	8	11	14	30	10	17	9	6	15		93	13	8	10	10	15
20140126	13		32	39	36	29		37	62	47	50	53	48	62	35	34	29	32	59	55	31	50		58	57	59	30	40	33		50	40	35	33	37	35
20140127	13	134	131	161	142	148	129	154	139	147	162	145	134	143	73	142	77	131	179	148	143	129	117	182	167	130	108	143	146	137	145	154	138	148	137	117
20140128	13	61	47	57	58	65	58	54	40	54	69	35	59		52	45	46	64	41	60	27	60	30	25	27	12	33	17	44	53	53	67	55	58	62	48
20140129	13	125	111	122	122	125	133	124	110	105	124	113	109	113	112	141	158		103	114	165	124	112	143	3	122	96	169	172	127	103	139	124	119	116	123
20140130	13	14	15	14	5	12	15	10	8	7	17	11	8	23	16	16	21	7	11	9	3	13	3	10	7	8	3	9	16	18	132	9	12	12	13	14
20140131	13	69	67	70	69	55	68	81	117	76	75	69	67	77	75	97	104	89	120	132	121	95	83	110	150	116	78	174	128		74	79	72	66	77	63
20140101	14	23	17	22	22	22	22	23	23	19	25	24	26	34	31	23	21	27	31		33	22	26	27	29	29		28	19	52	52	29	21	20	24	12
20140102	14	108	111	98	114	141	116	167	100		112	117	121	112	106	119	92	87	113		3	81	84	58	158	32		92	118	120	3	129	117	105	118	100
20140103	14	16	14	19	21	16	17	24	22	25	28	23	22	31	20	25	18	20	22		12	16	11	25	23	26	11	6	21	18	23	24	16	17	20	18
20140104	14	170	176	145	171	147	169	158	121	136	173	143	137	216	195	209	186	151	121		94	140	107	98	116	84	89	89	110	153	217	188	180	163	185	145
20140105	14	29	23	20	29	31	31	21	12	20	23	25	25	30	36	30	30	26	15		18	29	25	26	15	13	27	14	25	39	70	35	29	17	33	25
20140106	14	138	128	132	142	125	131	158	140	142	148	144	151	96	106	141	87	144	179		152	184	140	132	169	141	155	86	87	124	139	147	3	131	139	138
20140107	14	44	20	20	3	21	47	18	15	20	19	21	18	27	20	47	19	16	24	13	7		14	3	3	19	15	6	18	54	94	16	16	9	17	3
20140108	14	19	14	10	19	10	19	14	10	8	11	9	14	13	11	16	16	11	18	6	8	15	16	22	16	19	13	8	18	13	8	14	15	13	14	12
20140109	14	10	3	11	15	21	11	7	9	7	18	38	24	51	38	11	11	8	6	26	9	10	12	17	3	12	11	5	4	39	31	5	8	6	10	5
20140110	14	50	35	43	72	56	51	59	44	48	72	73	88	246	81	56	65	41	19	69	71	29	32	39	16	29	25	49	79	154	81	52	40	52	63	48
20140111	14	78	120	3	225	66	90	87	77	62	138	101	86	191	202	203	112	76	105	76	106	54	35	80	121	36	29	55	266	333	159	141	159	78	231	74
20140112	14	13	10	3	19	9	13	13	4	8	13	11	5	22	12	17	14	9	9	4	3	17	4	10	12	12	7	3	14	17	23	15	16	11	16	8
20140113	14	79	3	60	91	67	64	66	51	52	85	154	49	217	177	156	116	47	70	56	101	46	31	44	79	50	32	97	206	205	119	80	80	60	91	74
20140114	14	67	114	127	207	50	88	78	40	36	145	167	118	142	156	157	99	8		125	44	15	14	32	35	9	5	54	151	79	67	91	127	61	164	79
20140115	14	50	41	43	51	44	44	61	61	75	54	80	83	140	96	60	63	36	151	103		33	26	45	158	51	14	51	251	407	185	51	58	39	73	40
20140116	14	149	132	172	162	165	210	218	289	161	201	222	269	253	290	308	351	225	26		418	243	128	40	29	25	101	408		300	399	158	145		157	192
20140117	14	58	85	84	158	62	63	115	29	76	196	249	161	243	214	193	67	112	16		125	131	135	11	20	21	111	121	132	208	219	78	167	68	178	53
20140118	14	163	142		155	144	142	163	70	112	186	116	120	111	114	142	32	14	31	153	10	10	5	38	26	15	3	27	81		158	149	145	160	141	90
20140119	14	180	174	179	191	173	183	181	147	149	194	164	155	158	203	228	190	157	178	155	205	173	164	123	162	47	153	185	198
20140120	14	6	10	7	10	10	12	9	8	4	11	8	8	7	6	13	7	8	14	11	4	3	13	6	3	7	3	5	10
20140121	14	43	43	45	53	34	43	44	31	50	60	54	48	60	44	50	31		18	43	14	28	13	21	13	11	8	4	38		53	51	49	45	61	29
20140122	14	118	110	101	104	99	110	96	107	101	104	100	86	95	140	136	162	86	111	90	139	68	66	93	110	98		142	191	165	100	122	105	94	112	95
20140123	14	212	203	218	224	200	206	224	203	182	225	216	201	216	232	280	270	155	274	218		214	197	155	268	137		184			218	231	213	210	221	186
20140124	14	79	65		79	92	97	198		122	99	156	170	153	60	74	69	81	59	205	276	78	45	154	30	30		169	86		242	88	69	57	82	62
20140125	14	11	14	16	16	9	14	15	10	8	16	15	13	31	12	15	7	8	12	11	6	10	10	25	11	5		5	8	10	16	14	14	16	18	9
20140126	14	23		46	42	41		54	62	63	52	65	64	72	51	42	44	35	56	72	46	47		67	59	65	41	46	41		67	48	43	50	47	39
20140127	14	147	144	163	151	146	141	176	162	146	164	147	149	145	147	151	136	145	187	156	146	132	130	95	191	65	122	145	161	148	138	168	143	158	144	138
20140128	14	56	57	63	60	61	61	65	60	62	70	57	65	42	55	55	47	53	63	73	46	74	62		45	31	41	40	46		61	72	57	63	67	49
20140129	14	157	146	143	139	145	159	150	113	115	134	132	119	136	125	166	188	137	104	121	175	141	132	135	75	119	107	187	214	148	118	162	136	148	139	151
20140130	14	17	10	11	10	17	18	9	7	9	12	13	8	26	9	18	11	8	12	10	7	13	3	16	8	13	6	4	9		107	17	14	14	13	13
20140131	14	90	91	76	87	83	101	83	91	77	81	79	80	69	92	111	109	91	101	102	134	85	73	81	147	106	57	181	118	116	75	104	89	80	85	93
20140101	15	19	13	19	23	19	20	21	24	17	31	27	26	54	34	25	21	19	29		31	22	23	24	30	27	26	28	23	41	47	29	21	20	30	15
20140102	15	124	117	103	115	402	119	155	113	110	117	108	125	122	109	128	97	105	105		3	100	83	52	211	38		72	130	129	79	133	121	102	130	107
20140103	15	15	15	19	20	16	13	22	20	26	19	26	18	32	26	20	24	14	24		10	17	8	18	22	28	7	8	25	19	22	22	16	17	18	12
20140104	15	178	178	154	183	150	180	170	133	145	189	159	159	220	195	190	169	165	120		92	151	123	98	128	93	106	92	108	136	211	201	184	161	188	169
20140105	15	28	29	25	33	28	29	24	18	19	30	22	20	27	32	27	26	22	13		21	30	16	20	10	12	23	17	21	34	49	32	28	25	32	25
20140106	15	140	123	135	133	136	147	154	143	157	153	150	152	151	123	131	130	165	176		141	176	131	132	163	143	163	81	103	140	143	150	3	139	136	137
20140107	15	46	41	20	18	104	32	22	16	17	26	17	19	21	16	37	19	14	22	11	9	23	10	7	13	10	11	8	18	42	21	28	27		18	15
20140108	15	22	16	14	18	14	9	17	9	8	10	10	11	17	8	17	19	14	17	8	8	10	10	16	17	15	13	13	12	13	11	15	13	16	14	13
20140109	15	10	18	17	40	11	8	26	3	12	38	45	38	47	40	23	16	10	8	40	12	16	12	13	10	15	10	10	15	43	33	26	28	16	30	3
20140110	15	46	44	56	88	43	50	51	36	53	90	124	82	210	81	53	58	40	13	73	42	35	20	22	11	19	12	51	56	156	91	56	63	40	70	39
20140111	15	108	128	93	265	68	113	88	76	68	239	195	98	225	188	187	124	79	76	86	82	64	39	47	66	39	20	61	178	384	139	135	144	94	204	87
20140112	15	9	4	3	15	11	6	6	5	3	7	28	18	35	7	13	10	6	11	21	10	14	8	6	8	15	5	9	13	17	23	13	11	7	14	9
20140113	15	81	47	60	3	50	50	63	65	51	93	154	68	170	150	152	104	51	93	75	85	45	30	44	74	31	29	82	190	184	130	85	87	56	85	45
20140114	15	115	129	127		58	105	125	46	94	148	129	154	117	140	167	69	29		152		28	10	22	61	10	3	22	128	83	78	144	138	114	150	81
20140115	15	50	54	53	74	47	42	56	66	71	79	102	59	128	155	98	46	37	121	74		38	17	38	139	53	3	50	277	431	176	56	66	44	76	41
20140116	15	108	101	93	106	123	253		179	154	140	208	203	229		330	319	202	26		423	199	123	28	26	21	122	373	177	239	390	104	92	103	106	244
20140117	15	14	52	80	130	12	29	92	9	3	162	260	172	247	220	159	111	109	17		137	127	112	11	14	12	129	119	133	217	249	67	96	47	146	13
20140118	15	104	107	79	110	105	105	126	104	108	146	140	116	142	107	99	48	38	77	211	52	17	10	39	37	11	3	35	65		137	116	105	103	111	90
20140119	15	190	180	184	199	177	179	175	156	153	192	182	174	170	206	232	196	165	173	182	225	180	174	38	161	32	164	195	234
20140120	15	8	9	13	6	12	14	8	8	7	9	8	9	5	7	12	11	4	9	3	8	7	5	4	5	8	3	6	11
20140121	15	48	47	52	45	48	53	52	46	48	50	53	51	58	52	40	43	18	20	50	14	21	19	14	13	19	7	17	27	56	40	53	47	48	42	45
20140122	15	119	118	96	118	113	113	96	108	85	95	88	89	104	112	135	145	114	123	96	142	83	74	91	109	88		162	164	160	100	132	115	94	120	110
20140123	15	210	212	218	221	200	205	216	196	189	233	219	200	226	242	308	234	239		216	167		194	166	250	142		185	127		217	234		199		184
20140124	15	83	66		58	76	72	140	166	130	69	121	134	113	58	94	46	37	24	170	146	40	22	170	26	31		89	51		191	94	74	66	66	72
20140125	15	13	12	9	8	9	9	15	7	7	11	14	13	23	10	14	8	7	9	15	7	14	7	24	13	11	8	11	10		20	15	12	14	18	9
20140126	15	54		59	64	51	36	63	64	65	67	75	69	73	61	56	42	43	60	75		46	30	67	56	64		47	61	51	87	63	53	56	59	45
20140127	15	127	134		133	113	143	128	155	82	161	157	122	153	163	133	157	146	165	103	149	138	124	15	170	27	117	145	155	160	154	168	124	115	127	143
20140128	15	59	57	63	61	58	61	62	68	66	69	70	64	65	42	52	51	58	79		49	82	58	24	62	43	66	44	41		57	67	62	60	62	53
20140129	15	168	164	164	166	155	172	155	119	123	153	145	133	153	145	203	196			133	194	151	144	143	128	128	109	179	232	188	122	173	159	152	161	164
20140130	15	17	12	14	10	18	16	15	10	9	20	50	9	48	16	17	14	11	15	53	6	12	7	16	10	13	7	4	13		63	19	14	16	17	15
20140131	15	114	114	103	106	96	112	94	90	82	86	85	81	80	118	122	119	121	96	90	158	91	67	103	130	130		182	110	121	74	123	108	99	115	103
20140101	16	22	20	15	24	20	22	25	21	17	31	39	25	47	32	26	23	21	25		30	20	26	23	23	23		26	27	33	53	30	25	22	29	17
20140102	16	121	123	110	129	259	131	138	124	140	140	111	115	138	125	127	104	114	120		107	105	94	49	116	42	80	79	138	133	132	134	129	106	132	123
20140103	16	13	19	16	21	18	15	15	19	17	25	24	19	28	22	18	23	13	21		10	18	11	18	23	28	9	11	26	18	19	19	15	15	22	15
20140104	16	192	180	156	190	155	193	177	140	149	199	171	167	216	195	190	121	170	132		97	157	145	96	129	112	129	86	92	124	199	199	192	161	202	177
20140105	16	29	21	19	23	23	23	29	21	20	30	24	21	32	35	30	27	22	14		19	27	15	25	11	9		18	22	28	69	27	26	21	31	27
20140106	16	138	127	136	136	135	131	160	152	155	153	157	149	154	148	132	113	162	179		139	182	146	143	177	166	166	85	117	134	147	145	93	141	140	133
20140107	16	39	33	21	29	137	31	20	15	15	22	13	16	18	20	31	19	10	15	8	13	24	11	14	17	15	13	12	14	32	19	34	30	3	25	3
20140108	16	21	14	16	22	11	3	9	6	8	12	14	11	16	12	14	15	14	16	10	11	8	10	16	17	19	9	9	16	16	12	19	15	14	15	11
20140109	16	30	31	32	55	18	21	46	7	44	46	47	43	55	46	40	12	3	11	42	10	10	10	16	9	21	7	12	10	37	37	40	33	29	37	15
20140110	16	58	58	60	91	48	42	68	31	72	90	123	133	169	87	60	57	37	20	74	37	41	26	16	12	28	15	37	67	173	79	66	62	60	69	40
20140111	16	167	190	144	272	96	144	158	63	72	211	216	176	213	217	199	140	83	51	112	78	70	38	37	30	35	26	72	204	390	136	203	185	119	182	108
20140112	16	14	14	12	20	10	11	19	5	24	26	32	33	37	15	16	13	8	11	32	8	18	9	6	9	12	5	10	14	18	22	16	14	10	18	8
20140113	16	80	94	81	101	46	84	61	45	54	118	146	112	180	139	144	93	83	85	111	72	45	23	39	79	27	21	73	157	207	113	93	103		126	63
20140114	16	132	129	129		106	118	133	94	124	114	90	116	103	114	147	73	38	33	123	12	36	11	15	56	15	8	6	114	73	74	148	127	118	129	99
20140115	16	64	73	70	77	50	61	61	71	65	91	121	69	170	219	221	117	45	94	79		42	24	42	100	57		65	347	441	185	81	74	56	83	58
20140116	16	108	101	93	106	123	253		179	154	140	208	203	229		330	319	202	26		423	199	123	28	26	21	122	373	177	239	390	104	92	103	106	244
20140117	16	13	105	78	139	11	7	51	6	8	217	276		277	227	145	75	111	14		193	137	107	12	14	15	128	113	172	231	291	103	110	6	169	10
20140118	16	90	84	116	108	87	85	129	111	128	123	128	129	119	94	78	82	62	124	155	38	37	18	34	100	22	5	25	72		82	96	86	114	99	77
20140119	16	195	190	188	200	171	183	193	118	171	196	193	203	189	220	254	216	177	183	223	215	183	186	17	179	21	161	191	235
20140120	16	12	8	11	10	8	12	10	7	7	10	6	6	12	12	10	3	3	10	11	3	6	4	5	3	9	3	7	10
20140121	16	50	57	54	68	43	45	56	48	51	62	52	48	54	64	64	35	20	50	50	21	28	24	16	33	20	10	24	36		36	56	55		57
20140122	16	117	111	107	117	114	128	92	108	91	131	112	96	122	135	155	161	118	113	92	183	83	91	91	105	67		166	152	167	123	120	111	103	119
20140123	16	218	213	213	223	202	213	216	203	190	227	235	207	235	275	294	218	262		226	217		209	166	231	144	200	193	259		222	230		195		194
20140124	16	60	72	37	60	64	40	71	214	102	51	80	92	93	67	60	38	26	39	146	12	27	20	144	38	28		60	34		149	82	69	52	68	39
20140125	16	12	11	12	13	8	11	12	12	12	11	14	13	23	10	14	8	7	9	15	7	14	7	24	13	11	8	11	10	9	20	15	12	14	18	9
20140126	16	65	33	70	65	67	59	74	79	78	79	82	83	76	61	58	38	49	67	94		47	45	69	61	64		45	62	59	96	74	66	68	67	53
20140127	16	46	62	27	60	75	148	55	28	17	90	27	23	166	154	100	146	142	58	16	147	128	119	12	49	16		145	137	178	169	78	63	56	67	147
20140128	16	59	54	65	62	67	59	75	75	74	75	73		61	64	54	45	64	65	48	49	69	53	46	64	59	56	44	37	53	61	66	60	68	67	47
20140129	16	175	171	168	177	158	179	165	127	130	171	154	143	154	167	205	214	185		136	219	153	129	180	129	120	134	196	242		134	184	171	163	179	170
20140130	16	16	18	22	19	15	19	14	29	34	21	57	52	52	30	20	14	9	17	95	6	10	13	16	19	15	5	4	8		64	24	20	17	17	16
20140131	16	128	120	122	128	119	122	106	89	81	116	89	83	80	125	128	106	138	89	87	166	92	82	113	108	130	53	119	137		75	137	126	120	130	114
20140101	17	28	17	18	23	21	23	26	22	18	43	61	40	55	27	30	27	20	31		28	21	28	24	24	25		22	32	36	49	34	22	20	34	15
20140102	17	129	124	118	131	170	147	150	126	117	150	134	121	132	138	130	122	121	133		103	102	117	59	117	40		92	134	139	145	150	133	119	145	137
20140103	17	18	15	12	17	21	28	22	22	21	19	21	20	25	24	29	38	13	22		8	14	12	25	18	23	10	10	31	19	19	23	21	18	20	24
20140104	17	199	180	154	187	174	192	177	141	156	206	186	170	193	175	181	109	181	143		109	165	156	104	146	130	142	83	102	116	186	199	195	166	198	177
20140105	17	30	24	19	20	31	29	25	30		27	30	34	37	35	29	25	24	38		19	27	21	28	52	9		30	22	29	109	34	33	22	37	32
20140106	17	137	131	139	146	134	138	159	158	151	157	166	157	164	161	131	117	156	185		135	181	144	152	161	161	170	104	127	139	158	149	142	141	150	137
20140107	17	32	26	21	26	40	24	19	13	15	20	10	13	11	26	31	20	14	20	7	9	22	11	16	14	17	13	13	32	27	29	34	28	14	17	3
20140108	17	24	15	11	17	16	9	11	8	11	13	12	11	19	11	19	22	19	23	13	12	12	9	15	17	19	10	10	18	17	17	14	12	11	15	14
20140109	17	42	39	45	69	36	36	44	14	47	56	54	49	53	46	50	37	11	20	39	13	10	16	15	16	18	12	13	28	34	39	50	48	41	56	32
20140110	17	68	63	81	111	63	62	94	49	119	116	120	122	150	106	94	69	26	23	96	42	50	29	23	21	24	12	32	118	189	102	83	80	77	83	52
20140111	17	179	157	191	249	163	148	222	71	80	198	200	199	199	236	226	194	96	66	219	87	84	57	42	53	32	20	81	270	396	136	180	163	183	184	118
20140112	17	24	21	27	39	19	14	35	7	33	36	32	32	35	27	21	20	11	12	34	12	18	10	8	8	9	5	12	15	25	29	24	22	30	23	9
20140113	17	121	123	116	175	71	113	102	58	100	140	156	130	148	139	138	121	88	86	141	59	46	23	27	84	31	17	61	172	201	118	128	122	97	129	104
20140114	17	108	95	101		106	124	106	125	106	103	85	89	104	94	144	128	49	82	100		35	16	17	49	18	9	15	130	84	66	106	95	105	99	111
20140115	17	84	127	84	166	60	86	79	73	59	171	133	98	206	340	324	273	38	81	99		51	40	48	88	86	3	68	402	462	215	129	174	71	216	84
20140116	17	261	247		256	136	263	112	140	130	296	357	270	407	190	356	333	177	238	240	451	173	179	24	215	19	121	369	363	262	411	263	248	224	292	258
20140117	17	60	209	196	238	9	27	179	7	5	274	301		318	285	235	89	12	15	8	135	141	104	10	13	15	123	100	199	268	319	236	228	81	248	9
20140118	17	90	98	95	97	85	83	101	133	123	113	100	111	78	102	82	74	81	128	140	56	83	32	53	114	86	14	41	82		88	102	99	83	104	75
20140119	17	197	200	188	201	182	195	207	42	201	202	209	204	223	223	270	232	193	198	218	212	192	177	26	164	18	179	184	245
20140120	17	11	9	10	6	9	3	6	8	8	10	6	10	6	6	11	10	9	11	10	5	7	3	8	9	3	3	3	11
20140121	17	60	65	58	63	57	60	64	46	48	65	46	49	47	51	68	59	47	55	52	26	33	24		47	24	9	19	47	56	50	67	61		66	53
20140122	17	123	121	122	137	117	138	116	109	86	126	153	131	143	163	190	168	134	103	107	194	84	109	88	103	80	84	167	155		144	125	130	110	136
20140123	17	223	257	217	252	207	241	220	230	204	265	249	212	256	283	274	255	242	155	227	215	156	212	168	228	181	214	199	250		236	263	165	205	209	232
20140124	17	35	31	47	46	38	31	58	208	74	40	82	75	90	50	34	21	20	120	138	9	31	19	144	35	26		42	24	60	130	39	34	44	47	26
20140125	17	11	12	15	3	11	11	14	14	11	7	18	10	17	13	12	16	6	13	17	7	12	9	20	19	13		6	11		18	14	13	12	16	13
20140126	17	64	60	76	71	69	56	78	79	80	78	86	84	92	64	63	54	54	70	105	51	54	46	65	66	67		54	59		115	73	66	75	69	52
20140127	17	38	20	15	10	61	85	11	13	10	14	15	16	160	155	36	141	153	17	14	142	85	122	8	9	3	81	131	127		172	32	24	38	19	81
20140128	17	77	69	74	75	79	77	75	71	72	82	74	41	72	69	58	41	56	86	69	53	72	60	63	77	66	55	42	42	54	77	89	75	72	80	63
20140129	17	183	177	174	173	171	184	172	137	145	175	159	149	155	184	208	219	198	99	148	230	163	187	203	146	132	139	228	255		145	198	184	169	183	175
20140130	17	24	23	30	28	23	27	29	79	72	35	83	80	80	33	26	23	12	30	91	9	13	14	18	16	19	3	9	14		90	29	22	32	28	19
20140131	17	130	127	140	135	129	127	143	89	101	137	97	99	119	127	127	117	143	90	90	149	92	90	106	114	125	64	122	136		98	151	136	140	131	117
20140101	18	36	21	36	40	34	22	42	23	16	57	81	66	77	46	54	29	29	52		29	24	52	43	27	30		34	69	44	50	45	35	35	50	20
20140102	18	135	126	132	144	131	152	165	133	121	157	144	138	153	163	147	141	123	132		130	118	131	69	130	53		99	159	146	154	160	151	135	154	149
20140103	18	32	28	21	30	33	35	27	54	22	32	30	30	58	40	39	70	31	30		11	25	23	33	44	26	12	15	47	27	40	40	42	28	40	31
20140104	18	196	189	161	190	177	199	180	143	144	188	192	164	208	189	206	147	195	153		108	172	156	119	148	129	145	76	150	130	189	208	195	174	194	180
20140105	18	30	33	29	36	32	33	34	50	28	49	68	50	54	57	33	42	34	46		21	49	38	42	57	14		50	39	25	122	50	44	30	45	44
20140106	18	144	141	142	152	134	144	166	163	150	168	169	166	177	173	137	124	147	176		143	185	152	164	177	156		108	165	138	169	164	149	145	163	143
20140107	18	30	25	14	24	21	29	16	20	13	18	13	11	16	50	42	34	35	26	12		31	9	14	11	15	12	12	68	34	40	18	23	16	24	18
20140108	18	16	12	11	18	14	20	15	9	9	17	12	14	18	13	15	62	23	34	12	13	16	17	10	13	20	15	19	27	20	27	13	13	14	14	17
20140109	18	47	47	50	73	47	45	55	46	46	62	57	61	53	46	57	56	21	31	43	19	32	30	22	23	21	11	16	38	31	61	64	53	57	56	40
20140110	18	103	83	110	175	76	81	126	112	125	135	130	127	159	119	144	91	63	39	104	74	64	52	22	22	25	17	35	188	201	114	122	105	100	118	66
20140111	18	187	152	194	299	160	169	208	109	154	219	196	228	221	249	282	212	136	84	226	116	84	90	40	69	43	20	119	296	410	145	207	210	185	235	150
20140112	18	36	31	36	51	29	27	34	23	33	38	61	43	51	38	31	42	15	37	41	23	31	25	9	10	14	8	11	40	27	50	43	36	37	35	27
20140113	18	120	115	101	193	113	113	131	68	119	173	171	146	154	166	186	158	92	90	152	66	60	27	57	92	30		68	190	199	105	136	135	100	142	108
20140114	18	94	84	97	70		90	93	128	88	108	94	97		85	143	178	95	132	97		48	38	26	71	13	6	25	152	82	64	99	87	89	101	81
20140115	18	298	314	249	383	127	257	152	81	64	324	221	199	369	450	412	347	43	83	131		56	60	56	96	87	9	65	446	469	387	344	361	187	390	237
20140116	18	301	326	205	336	230	300	261	187	143	352	392	336	425	351	380	361	293	189	250	453	195	185	33	237	15	152	358	414	257	417	370	334	271	343	284
20140117	18	222	260	253	274	11	192	226	9	8	350	379	129	373	316	302	217	33	23	6	123	159	116	10	12	8	124	75	208	276	356	277	274	187	292	89
20140118	18	103	102	95	117	96	92	92	123	82	124	93	89	112	105	131	106	71	127	99	108	111	60	105	133	104	30	73	76		108	116	111	85	111	73
20140119	18	199	191	195	211	143	189	138	30	33	234	230	217	217	237	268	252	201	58	114	235	211	184	19	20	21	199	183	262
20140120	18	9	11	10	9	6	7	12	8	6	10	8	11	17	10	9	5	7	13	10	10	5	7	9	7	4	3	10	13
20140121	18	55	53	52	53	56	56	53	55	51	55	56	49	66	62	71	62	54	63	52	63	56	31	27	61	25	9	40	62		72	58	47	34	54	54
20140122	18	169	149	141	169	136	155	130	116	87	167	161	166	173	175	187	166	147	107	142	210	101	134	100		114	84	179	170	156	169	175	172	137	173	149
20140123	18	269	269	222	296	213	272	228	222	205	306	272	242	294	280	272	271	248	216	225	232	231	231	180	231	211	220	194	272	288	241	309	282	213	298	263
20140124	18	28	27	36	35	30	16	42	215	74	28	86	62	116	34	36	30	23	32	57		28	20	89	27	19		47	87	59	88	33	27	35	34	24
20140125	18	11	12	15	3	11	11	14	14	11	7	18	10	17	13	12	16	6	13	17	7	12	9	20	19	13		6	11		18	14	13	12	16	13
20140126	18	64	59	74	72	62	64	77	85	80	79								70	105	51	54	46	65	66	67		54	59		115	73	66	75	69	52
20140127	18	14	6	11	7	15	21	10	9	12	14	14	8	137	53	17	177	88	10	9	155	7	26	14	12	7	5	135	108	194	166	22	15	15	15	36
20140128	18	67	62	74	68	81	66	80	74	75	82	81	82	78	59	60	48	63	78	83	56	70	60	74	94	77	55	44	44	56	91	78	68	76	75	62
20140129	18	185	182	172	189	167	193	169	137	150	188	159	150	166	186	212	231	210	153	158	267	170	219	194	170	154		232	274		143	206	187	159	195	184
20140130	18	37	35	37	41	32	33	72	83	87	62	125	127	141	36	29	21		71	108	18	36	34	57	30	71	3	12	48		116	43	41	35	48	30
20140131	18	136	126	144	143	130	127	149	90	121	150	148	132	139	134	126	125	139	104	106	130	94	104	94	111	124	79	117	144	122	110	151	138	141	131	118
20140101	19	54	33	62	54	52	33	88	49		88	85	75	148	89	70	43	38	71		67	75	114	57	47	29		26	123	38	160	82	63	58	77	23
20140102	19	164	131	147	161	146	163	186	163	111	166	171	147	171	159	177	156	141	142		174	149	162	75	121	51	108	104	211	155	198	175	170	141	179	162
20140103	19	36	25	30	51	36	39	36	59	23	54	65	58	63	75	51	69	49	35		25		55	41	54	25	18	15	45	29	45	58	54	37	61	36
20140104	19	194	186	169	185	185	183	173	147	144	194	217	166	234	203	266	217	200	177		122	178	186	124	151	129	152	75	247	165	228	199	192	175	194	178
20140105	19	35	46	37	41	39	30	44	58	36	75	85	108	77	84	46	71	41	66		71	60	94	44	40	33		59	100	35	154	62	44	40	61	67
20140106	19	152	142	145	158	148	148	166	192	153	166	175	171	182	175	142	200	152	178		143	190	167	159	196	162		107	208	136	180	172	152	157	178	141
20140107	19	32	21	21	22	27	35	19	30	13	18	21	13	15	28	47	30	41	15	20	28	45	14	15	7	15	13	15	76	38	60	20	18	23	21	24
20140108	19	21	13	17	23	16	14	14	14	11	19	14	16	22	21	17	42	41	42	14	33	23	16	22	14	25	13	20	40	24	66	19	13	17	19	17
20140109	19	49	47	53	83	54	50	66	56	40	80	64	77	61	47	76	70	53	40	49	25	35	25	43	37	26	22	16	49	38	101	68	53	54	62	44
20140110	19	133	104	124	188	103	111	126	145	103	142	154	139	164	150	177	139	79	70	141	113	71	63	37	36	33	25	67	237	228	165	135	118	116	128	93
20140111	19	254	231	213	358	180	219	208	104	177	246	227	233	252	291	339	269	179	95	185	157	145	105	54	77	43	27	147	383	395	160	269	261	195	270	186
20140112	19	38	32	41	56	33	32	43	45	35	51	68	59	56	51	75	50	28	41	73	71	47	45	26	22	18	14	20	63	38	65	48	38	41	51	28
20140113	19	131	126	149	217	99	116	160	85	132	178	192	184	196	192	233	236	121	114	189	110	94	51	81	96	36	24	67	305	205	124	160	148	121	165	100
20140114	19	98	94	97	108	105	95	94	135	86	120	105	114	102	94	167	155	145	137	113	63	76		41		20	16	36	173	103	83	105	98	98	103	79
20140115	19	436	396	429	481	357	409	354	101	124	486	388	345	500	482	460	425	153	115	177		94	76	96		87	40	292	500	478	472	469	448	363	467	355
20140116	19	371	347	351	369	280	362	353	191	213	394	424	373	463	376	403	409	373	176	290	483	312	315	43	207	55	165	361	469	254	456	403	363	343	369	331
20140117	19	268	287	272	350	82	223	248	9	9	421	428	281	390	376	355	280	91	32	10	142	180	144	15	12	12	114	77	274	279	344	344	319	216	347	165
20140118	19	113	109	112	121	97	102	113	102	81	132	129	121	132	118	137	155	85	93	106	117	104	86	119	95	124	75	79	139		142	118	112	104	116	92
20140119	19	81	171	67	211	27	61	27	34	17	184	225	57	230	256	260	220	213	23	23	275	217	198	20	16	16	100	200	266
20140120	19	9	9	16	8	14	11	15	11	9	10	8	8	33	5	12	3	13	13	11	8	6	10	5	4	8	3	7	9
20140121	19	67	62	63	78	54	59	65	55	45	84	84	84	89	80	86	74	77	74	64	83	88	56	34	69	42		55	121		111	77	73	60	80	51
20140122	19	181	168	179	199	164	176	169	116	132	193	177	203	215	181	175	177	178	127	182	221	132	155	96		109	116	181	178	175	202	194	188	170	201	184
20140123	19	264	249	271	286	231	259	235	234	218	313	298	287	337	277	288	286	258	238	249	315	260	260	180	238	223		194	315	271	294	278	266	248	263	254
20140124	19	28	22	35	28	40	26	36	215	57	34	64	55	137	34	39	42	20	95	69	15	33	12	111	20	19		51	197		63	33		36	29	28
20140125	19
20140126	19	83	78	93	94	74	71	91	89	94	103	140	138	148	97	82	79	82	84	134	93	74	61	77	74	80	90	68	86		137	97	87	85	93	66
20140127	19	13	11	9	9	15	22	9	7	11	11	13	9	18	15	10	111	9	12	8	91	10	15	15	10	12	3	118	152	87	205	19	12	13	12	46
20140128	19	63	60	64	64	66	65	69	85	83	66	78	81	107	53	69	59	76	86	97	81	81	61	76	89	78	57	52	51		123	70	65	65	72	56
20140129	19	194	177	174	195	177	203	173	140	140	193	178	159	181	189	225	269	229	169	168	292	218	220	201	179	168	177	245	295	232	156	203	204	172	203	193
20140130	19	45	50	103	68	42	61	129	98	107	147	196	162	205	113	72	106	59	99	138	73	79	105	97	76	95	8	60	165		207	71	56	107	82	44
20140131	19	130	127	137	143	134	120	156	94	121	158	168	165	151	134	139	147	126	120	140	160	111	121	94	113	120	90	105	161	133	143	148	136	141	140	111
20140101	20	66	48	83	76	61	60	109	46	26	137	72	93	202	158	125	88	52	73		135	72	100	52	36	31		31	89	46	220	88	97	86	90	44
20140102	20	168	142	148	167	160	194	195	159		190	158	158	207	179	211	201	149	124		239	156	210	84	109	54		105	283	170	206	181	175	162	188	187
20140103	20	57	46	43	58	36	38	47	98	24	86	65	82	203	81	61	103	110	56		57	47	80	49	70	23	22	29	72	50	148	75	67	51	73	40
20140104	20	206	173	157	184	179	193	173	176	143	185	198	165	239	205	253	246	196	175		143	173	199	125	150	133	148	68	291	197	234	201	189	180	191	206
20140105	20	45	46	36	51	47	41	55	72	59	106	74	123	82	69	53	80	49	59		110	77	85	44	82	40	21	69	145	65	239	66	48	44	65	62
20140106	20	162	146	155	168	160	152	165	197	152	189	181	171	180	178	155	221	158	173		179	193	196	167	197	154	189	110	197	148	178	173	163	165	181	140
20140107	20	37	29	19	31	27	31	22	29	17	21	20	16	24	20	40	54	17	14	17	37	37	13	12	5	10	8	17	66	40	93	32	25	22	17	19
20140108	20	18	19	18	23	18	18	15	17	13	23	16	18	24	18	22	27	61	38	16	49	37	12	20	27	23	11	29	39	33	82	20	18	21	23	17
20140109	20	58	54	52	91	47	48	64	77	43	88	104	68	71	48	102	72	64	64	75	67	34	42	41	31	26	25	57	60	59	144	67	58	53	65	45
20140110	20	141	118	136	212	112	117	133	134	105	154	145	155	186	170	208	173	103	142	123	134	90	97	47	56	34	20	105	239	220	177	151	134	128	142	100
20140111	20	242	246	226	353	176	248	207	96	183	271	188	219	321	402	376	312	182	97	182	258	133	124	72	38	32	32	191	403	399	267	260	259	202	286	219
20140112	20	45	40	47	67	37	37	52	71	33	64	85	61	79	51	72	72	47	66	59	77	63	67	45	44	22	12	31	106	47	94	54	46	46	66	31
20140113	20	163	142	162	276	107	134	185	143	133	189	177	177	252	215	241	264	159	91	199	182	90	85	109	89	33	30	68	356	210	203	184	163	140	171	139
20140114	20	94	92	86	102	87	95	97	143	93	141	121	127	112	92	154	143	123	164	146	125	98	125	48	115	16		95	197	105	99	92	101	91	98	81
20140115	20	500	454	498	500	436	450	492	144	252	500	500	468	500	497	500	465	320	100	300		119	112	90	97	79	38	388	500	470	500	500	496	445	488	405
20140116	20	399	376	383	391	350	400	390	233	271	416	416	375	408	390	435	405	380	223	316	441	392	369	55	175	156	265	373	435	303	447	430	395	359	392	354
20140117	20	344	326	323	396	102	210	173	11	12	439	435	385	372	368	387	340	112	42	15	238	195	183	20	15	20	110	87	328	284	337	401	368	219	387	157
20140118	20	108	112	122	126	101	101	117	98	103	135	151	155	156	117	139	157	115	109	125	115	104	91	113	90	115	83	92	190		192	131	133	110	132	98
20140119	20	19	25	33	22	27	37	38	29	20	28	29	31	144	143	191	35	135	26	22	295	117	148	13	15	13	11	215	273
20140120	20	11	12	13	11	11	7	18	15	16	17	9	10	17	12	11	5	16	10	10	4	3	9	6	5	6	3	9	9
20140121	20	91	91	88	97	80	87	90	60	55	119	108	101	111	88	91	120	80	99	84	137	95	71	56	86	49	8	70	116		124	105	108	83	108	71
20140122	20	188	167	192	198	177	176	194	147	148	228	202		236	181	186	277	188	125	180	263	151	162	103		104		181	250	207	251	205	202	183	204	195
20140123	20	294	244	291	286	250	254	247	242	218	361	323	309	366	304	301	345	298	267	255	364	269	271	254	243	221	222	188	386		288	290	267	261	299	246
20140124	20	25	16	36	27	43	26	41	234	37	33	57	52	107	28	41	24	16	180	93	24	31	11	84	27	19	9	53	213		129	26	23	41	31
20140125	20
20140126	20	102	89	109	113	85	87	130	100	121	149	158	154	159	112	110	88	98	95	144	107	98	62	85	68	85		73	93		165	107	99	102	110	76
20140127	20	18	13	14	12	13	18	12	11	3	13	14	7	8	5	19	23	9	4	6	17	10	10	11	6	11	5	25	38		151	18	15	11	12	11
20140128	20	67	63	63	59	59	65	67	88	80	81	84	79	92	61	62	55	70	97	111	55	102	53	92	85	76	55	29	60		135	72	69	59	69	57
20140129	20	202	179	187	193	190	206	192	141	148	196	178	157	230	208	252	299	211	163	161	310	216	236	249	179	120	159	248	366		176	208	196	182	196	198
20140130	20	125	133	132	155	101	115	157	108	173	173	204	188	235	220	124	154	146	136	201	111	165	80	111	112	105		91	120	182	252	146	139	136	172	104
20140131	20	145	140	138	153	131	142	173	102	109	170	183	161	168	149	142	159	134	146	158	194	141	197	137	160	114	107	112	167	151	142	158	140	169	150	119
20140101	21	94	67	84	95	86	59	130	68	29	145	66	104	193	197	168	84	75	49		105	76	117	72	76	31	34	28	101	82	219	96	84	99	109	53
20140102	21	178	148	155	193	182	204	201	175	132	217	165	163	272	227	243	269	139	119		297	138	171	81	129	54	105	110	286	189	211	190	180	167	199	194
20140103	21	54	58	53	69	47	57	71	88	44	132	63	83	124	79	58	132	114	50		61	30	92	69	50	22		45	81	98	131	78	75	58	81	42
20140104	21	183	179	142	184	168	209	168	181	134	180	200	179	236	190	260	257	193	148		137	167	237	134	154	129	147	50	260	244	249	191	183	166	191	279
20140105	21	44	53	55	81	54	41	60	108	61	131	96	108	69	98	90	134	98	64		122	91	118	104	107	33		112	123	135	227	70	92	48	110	51
20140106	21	176	151	159	178	158	156	174	198	150	184	174	175	201	176	158	193	198	173		198	195	207	177	191	158		110	268	168	183	183	176	162	175	155
20140107	21	26	17	16	23	22	29	23	17	11	22	23	10	29	14	26	34	15	10	13	32	25	6	4	3	9	8	18	78	82	95	28	27	16	23	23
20140108	21	18	17	18	25	18	14	16	20	15	29	16	16	29	19	25	88	40	25	23	35	60	10	35	21	23	14	25	60	30	94	22	18	21	24	15
20140109	21	55	55	59	80	46	52	68	64	47	103	88	63	87	64	97	68	66	87	84	115	55	67	41	42	24	20	63	76	73	143	59	56	54	56	42
20140110	21	139	128	121	214	103	111	126	134	95	163	120	141	219	171	219	189	131	146	136	182	101	83	62	50	35	23	145	248	220	189	153	135	117	150	98
20140111	21	218	244	226	370	173	225	203	74	121	295	176	233	276	407	377	338	128	60	171	217	117	111	122	33	27	52	236	445	431	310	253	264	213	314	217
20140112	21	55	56	54	104	44	55	60	74	34	76	82	56	94	55	88	74	59	55	62	162	59	62	50	82	14	11	38	100	50	125	70	69	53	84	45
20140113	21	169	148	156	304	150	157	183	125	129	225	182	170	253	256	264	407	166	84	157	154	74	116	118	76	27	27	97	370	223	212	188	178	154	185	169
20140114	21	93	93	93	122	81	91	106	160	86	149	129	132	121	106	143	133	138	110	123	261	84	79	76	94	22	16	139	174	137	146	105	86	90	103	79
20140115	21	531	478	507	534	463	491	508	182	318	544	525	495	546	533	512	509	404	99	336		103	146	81	100	74	42	431	564	475	551	558	517		525	443
20140116	21	372	374	400	413	356	376	428	235	334	463	411	398	390	406	392	357	384	377	367	417	372	421	71	198	168	365	339	353	339	462	438	402	375	422	335
20140117	21	387		385		176	353	411	14	11	401			355	366	388	378	134	33	117	299	185	186	24	12	17	129	104	351	291	340	414	375	321	389	284
20140118	21	124	123	117	133	102	123	129	103	118	160	163	163	178	149	166	185	151	117	149	125	127	81	92	102	94	82	105	186		350	147	163	108	171	119
20140119	21	14	21	24	16	19	25	22	21	26	24	20	24	18	22	37	25	24	19	13	255	25	23	15	16	16	9	236	89
20140120	21	11	11	10	9	10	10	15	12	15	15	16	14	19	10	11	6	19	12	8	6	6	9	5	4	6	3	7	10
20140121	21	106	104	104	110	97	93	107	77	54	128	127	98	126	95	108	111	95	74	75	135	117	88	81	90	48	20	81	125		144	112	110	97	120	83
20140122	21	188	177	196	206	179	182	208	169	155	255	205	208	281	201	197	308	232	129	174	264	129	202	109		113		180	267		312	215	223	192	216	216
20140123	21	276	242	270	303	265	282	272	243	227	354	318	317	362	322	363	381	314	239	258	343	239	295	331	236	203		180	429	293	353	280	270	266	309	278
20140124	21	21	20	29	22	36	25	67	225	36	31	53	49	100	28	48	22	18	189	82	13	86	16	92	18	21		40	220	69	163	24	22	27	28	28
20140125	21
20140126	21	103	99	120	120	94	94	131	109	129	140	161	161	172	112	108	105	131	86	149	109	101	70	94	78	85		66	79	118	157	115	109	114	116	86
20140127	21	11	8	11	12	11	13	11	14	12	13	6	5	7	8	13	8		10	7	12	9	11	10	6	10	3	16	15		16	17	15	11	13	9
20140128	21	76	69	69	90	65	73	71	93	85	105	107	91	115	96	50	60	70	94	121	63	74	51	96	83	84	51	32	53	105	140	87	86	64	91	63
20140129	21	198	182	195	196	189	194	219	161	150	203	183	174	259	222	237	267	234	151	159	387	208	252	265	165	112	167	233	377	256	223	217	198	193	195	182
20140130	21	114	122	160	176	112	126	195	152	164	192	184	185	233	188	107	132	189	165	217	123	170	93	130	138	125	83	60	107	104	192	155	152	218	185	142
20140131	21	150	146	151	165	137	144	201	131	118	178	164	161	173	156	145	164	173	125	132	166	165	196	189	131	102	119	122	188		156	171	151	161	159	125
20140101	22	97	73	85	112	83	72	131	131	29	141	61	91	136	226	215	133	110	54		90	57	87	99	41	35	33	35	123	144	207	123	101	91	123	63
20140102	22	171	155	168	172	180	231	213	183	104	241	166	156	273	247	325	406	164	126		211	142	148	124	115	53	102	99	316	234	216	179	181	184	225	275
20140103	22	76	74	61	116	65	66	78	98	56	107	116	117	108	106	78	103	88	29		72	65	68	108	43	21	21	31	64	80	169	100	103	61	131	58
20140104	22	160	162	145	164	184	266	175	176	133	180	180	171	229	188	272	243	196	138		134	159	191	130	144	117	152	50	302	245	237	173	165	159	166	273
20140105	22	105	114	110	139	91	97	98	127	78	145	114	110	130	137	121	131	121	65		138	97	131	105	107	43		105	135	134	145	122	122	101	142	94
20140106	22	173	169	163	174	161	165	174	199	147	197	174	180	212	178	181	184	194	185		203	200	200	200	195	155	189	114	236	167	197	189	175	162	183	157
20140107	22	24	17	12	15	16	16	17	14	11	18	31	13	19	15	22	33	9	12	16	27	20	9	11	6	7	7	23	64	45	109	19	14	10	21	18
20140108	22	17	11	15	31	19	19	16	39	9	22	16	16	38	18	26	199	29	24	24	78	41	22	35	27	21	16	18	75	33	106	16	19	19	34	20
20140109	22	61	52	64	99	53	53	62	56	42	119	67	55	93	93	76	74	55	79	67	98	56	59	54	47	23	20	70	67	77	156	70	59	62	64	48
20140110	22	121	123	122	200	102	101	112	144	75	184	100	152	252	178	253	190	160	84	113	146	100	99	78	37	40	30	132	279	237	213	143	137	109	159	93
20140111	22	186	243	206	331	184	220	158	42	29	184	70	60	165	427	369	355	151	31	63	179	116	98	21	15	21	41	197	446	454	298	236	249	206	260	223
20140112	22	63	72	68	89	54	64	63	85	34	90	80	65	95	84	102	74	85	52	66	84	50	53	76	53	13	14	44	85	52	126	69	72	58	87	54
20140113	22	183	150	169	219	153	245	173	136	136	241	237	163	197	332	259	405	125	78	139	136	78	82	125	65	11	35	131	363	224	272	189	201	150	212	253
20140114	22	106	94	115	128	95	94	119	188	82	156	127	131	144	141	186	143	171	96	135	138	76	60	102	93	29	16	114	197	146	179	119	110	109	121	80
20140115	22	532	493	528	551	472	500	533	156	396	596	550	517	592	580	566	533	402	130	375		98	125	76	121	64	45	426	556	480	586	565	524	480	524	450
20140116	22	290	334	317	321	273	278	378	250	359	414	436	437	407	420	313	354	324	423	350	427	381	419	123	242	191	381	343	268	317	436	396	344	324	339	279
20140117	22	364		372		282	342	397	19	91	392			346	377	369	372	129	31	228	221	171	165	32	11	21	130	109	338	297	345	382	346	351	384	301
20140118	22	143	138	149	165	129	165	141	109	130	161	186	165	162	192	144	198	132	134	161	124	151	108	106	108	94	111	88	139		346	144	143	132	169	139
20140119	22	15	10	18	10	20	26	19	22	12	27	12	19	11	15	23	19	15	19	8	167	15	16	16	12	15	9	27	40
20140120	22	8	8	12	7	7	8	13	15	9	13	18	13	34	9	16	9	12	10	11	10	8	6	10	8	6	3	9	10
20140121	22	117	103	117	125	108	100	123	105	51	144	115	118	153	112	114	123	110	73	77	105	83	87	81	81	51		74	117	109	164	124	108	111	119	87
20140122	22	191	192	193	246	181	196	221	170	177	294	193	190	279	190	208	295	229	180	165	226	141	190	125		121		176	281	197	250	221	234	192	223	232
20140123	22	279	247	279	272	280	289	304	260	232	333	258	290	354	328	338	391	318	253	243	268	245	258	303	239	180	228	175	448	295	404	291	272	278	283	292
20140124	22	21	13	27	28	29	28	74	259	46	32	55	45	86	29	44	23	14	37	65	67	88	11	65	9	18		40	234	74	151	30	26	26	29	34
20140125	22
20140126	22	110	102	119	118	99	109	151	120	131	144	169	160	147	141	130	97	105	88	145	85	100	87	95	69	92	74	66	78		202	122	118	111	123	114
20140127	22	8	9	6	12	7	9	10	16	11	9	7	11	9	4	9	9	7	17	6	16	11	11	5	6	10	5	22	25		7	12	9	13	14	9
20140128	22	69	57	79	76	66	66	95	97	97	104	122	107	141	75	52	58	66	99	125	49	68	42	90	83	85	48	41	61		162	74	70	75	70	64
20140129	22	203	179	193	192	217	193	218	167	147	199	191	182	195	280	236	270	300	147	162	365	197	237	293	181	133	163	228	372		304	202	191	199	197	197
20140130	22	134	115	137	132	119	153	144	146	163	136	194	152	241	129	136	123	131	144	191	131	122	75	132	143	148	93	52	105	94	173	157	151		129	126
20140131	22	148	155	150	163	140	147	160	147	131	174	163	163	167	159	160	170	145	116	112	180	116	151	133	120	103		153	185	151	160	169	158	146	168	139
20140101	23	95	90	81	117	76	84	135	91	24	143	64	55	127	177	207	128	106	116		78	62	66	92	49	39		38	156	213	239	117	106	92	134	101
20140102	23	179	145	170	172	198	227	209	213	118	203	163	160	241	303	317	343	172	133		179	138	129	135	110	64		93	330	233	239	188	175	170	202	267
20140103	23	94	92	90	113	90	91	91	141	58	104	137	126	127	82	75	99	60	42		59	74	54	103	30	13	26	27	68	79	190	109	93	102	110	80
20140104	23	172	161	147	155	183	191	173	178	131	171	194	166	221	220	257	235	195	149		140	159	185	164	153	105	132	49	311	262	214	174	164	155	163	254
20140105	23	121	118	129	129	109	111	144	137	114	142	146	133	133	144	123	149	140	76		138	161	130	76	101	54		104	153	116	136	134	133	128	139	102
20140106	23	170	166	163	167	166	176	174	211	163	198	195	177	215	174	182	175	211	185		223	227	193	197	199	161	186	116	242	179	202	172	176	180	178	164
20140107	23	19	10	14	13	7	10	17	9	10	11	21	12	18	13	26	24	14	8	22	14	22	5	16	8	9	7	11	63	32	81	13	8	9	14	16
20140108	23	16	14	17	28	57	31	20	40	15	18	24	21	44	23	21	179	19	27	23	84	54	45	32	29	19	11	15	74	60	106	17	17	18	32	50
20140109	23	71	60	52	122	48	63	52	71	41	85	67	54	112	104	92	77	44	67	59	79	56	62	76	102	24	24	70	69	88	175	85	78	52	85	57
20140110	23	121	131	116	199	90	103	120	160	59	180	106	135	214	210	242	243	179	40	82	114	70	95	96	43	36	33	137	303	267	167	138	136	112	154	94
20140111	23	98	166	83	109	103	164	143	22	40	132	12	17	28	86	239	179	155	19	11	208	116	78	11	9	17	41	152	437	451	259	123	194	77	156	131
20140112	23	59	68	68	89	55	56	61	87	35	95	70	88	92	102	84	65	91	40	41	63	44	47	90	35	17	19	49	95	48	129	69	71	66	89	46
20140113	23	212	171	165	252	142	286	174	152	123	245	164	165	230	348	250	417	175	120	121	128	86	72	70	64	7	27	147	395	228	223	167	224	154	249	291
20140114	23	114	107	116	129	106	100	129	166	83	155	113	138	175	175	222	144	209	92		135	69	82	103	85	34	16	104	198	136	178	128	119	116	130	94
20140115	23	553	507	558	586	494	520	568	142	437	621	602	543	640	582	591	549	463	228	326		111	108	81	113	80		417	513	481	549	589	532	507	553	475
20140116	23	293	270	282	271	253	290	294	276	364	322	433	425	414	327	313	316	295	409	352	468	364	400	291	288	291	379	397	265	224	392	316	284	281	277	279
20140117	23	337		360		240	296	385	22	105	397			345	386	383	342	134	33	238	168	168	175	43	21	20	114	125	349	301	347	378	338	344	375	271
20140118	23	112	109	141	132	115	152	161	139	134	191	218	163	162	163	100	146	113	153	191	99	118	99	105	109	100	100	77	136		328	124	118	125	128	149
20140119	23	17	12	20	15	16	25	18	18	12	22	18	20	13	13	21	20	9	14	14	35	17	14	16	12	13	9	11	31
20140120	23	9	6	11	7	9	10	8	13	14	10	20	15	30	11	11	6	21	14	9	9	14	4	15	6	10	6	9	11
20140121	23	119	106	132	135	122	96	130	90	59	170	129	118	145	116	130	119	130	74	65	88	78	80	88	100	46		83	110	94	175	126	111	126	119	93
20140122	23	184	197	202	246	172	221	211	212	174	281	219	205	274	208	250	391	243	129	151	213	137	203	135		126		179	363	198	279	222	233	194	260	233
20140123	23	272	251	286	259	281	272	319	267	218	305	239	257	353	376	347	365	311	250	227	376	246	243	370	239	179		169	446	332	388	274	263	280	264	279
20140124	23	45	28	41	25	53	15	78	224	25	46	60	59	51	27	34	27	11	23	53	141	84	12	53	4	24		55	257		152	39	38	47	35	31
20140125	23	50	43	50	55	55	59	28	29	17	51	61	40	52	33	44	42
20140126	23	123	122	120	134	108	109	171	146	142	136	189	161	160	159	131	99	92	105	142	78	95	93	107	74	93	78	64	92	128	195	137	134	114	132	106
20140127	23	8	6	8	11		7	13	12	9	11	24	5	8	6	13	8	13	14	5	12	6	8	10	7	6	3	19	15	11	10	10	8	11	10	10
20140128	23	71	58	74	72	68	75	85	104	110	88	126	118	144	73	59	69		75	135	52	70	96	100	116	83	60	38	60	69	166	73	65	71	70	74
20140129	23	194	173	197	189	209	185	211	174	146	199	178	199	194	281	205	297	274	162	157	298	209	254	369	148	73	164	208	379		245	203	185		186	190
20140130	23	140	145	148	170	158	154	127	143	155	188	199	172	174	134	120	97	128	138	177	187	109	98	153	149	137	95	61	81		153	209	171		157	150
20140131	23	163	146	151	166	142	163	158	140	134	171	176	153	156	155	165	178	159	112	110	188	126	144	139	110	124	120	185	213		147	169	159	154	161	147
20140201	0	160	130	156	146	143	162	155	139	119	169	155	153	176	151	157	178	169	105	103	164	165	207	171	114	131	110	167	191		138	168	144	149	153	156
20140202	0	122	103	137	116	127	126	139	146	141	128	134	144	125	124	115	97	110	130	151	116	111	117	269	151	129	108	78	105		130	133	117	135	119	100
20140203	0	8	3	3	3	3	11	3	5	7	10	13	16	9	23	15	13	6	7	14	8	12	3	10	5	4	5	9	40	37	9	8	4	4	8	5
20140204	0	3	4	7		3	5	4	3	3	4	3	3	3	11	6	9	5	5	3	14	4	4	9	6	5	3	14	30	5	22	5	4	6	6	8
20140205	0	81	107	67	70	66	75	116	87	83	116	136	119	111	70	89	92	145	42	87	62	50	52	60	45	40	25	51	110	93	158	136	100	80	84	71
20140206	0	115	106	106	120	120	120	121	151	105	140	143	139	162	144	127	140	162	118	123	140	132	142	159	128	100	127	91	91		161	123	119	107	130	114
20140207	0	85	88	80	82	77	80	93	137	107	80	82	83	76	70	89	93	100	136	126	101	157	96	123		103	131	98	93	70	86	93	81	84	81	81
20140208	0	81	71	79	76	74	84	88	139	105	80	78	87	74	66	82	102	126	120	100	149	130	156	119	143	103	118	119	98	71	64	101	76	80	77	86
20140209	0	3	6	10	6	3	3	6	10	5	12	10	7	3	3	3	9	8	10	6	7	11	7	30	4	16	59	7	8	11	10	8	9	11	5	3
20140210	0	13	14	15	17	13	10	18	22	18	21	20	8	65	15	15	17	4	15	10	12	54	4	34	12	11		25	43	116	123	16	12	16	17	10
20140211	0	71	53	68	77	59	56	78	64	56	96	100	62	117	84	87	105	102	55	61	63	47	63	74	72	34	21	44	114		131	78	67	67	80	53
20140212	0	163	167	169	195	173	175	169	162	141	233	194	160	263	205	165	259	279	117		188	120	169	153	127	65	63	121	180	175	207	190	185	174	191	192
20140213	0	187	202	105	153	152	220	128	174	83	123	152	126	160	175	261	201	198	138	91		235	209	113	138	102	138	165	199	236	231	215	183	99	170	217
20140214	0	235	217	235	229	239	221	236	246	199	258	244	215	255	243	248	229	221	242	221		219	231	222	233	205	177	108	113	232	311	238	220	235	217	211
20140215	0	679	488	549	616	584	809	523	429	298	766	347	441	480	753	443	627	566	313	315	331	287	337	303	368	258	247	309	714	593	491	659	555	567	697	672
20140216	0	447	427	486	498	500	457	468	449	436	543	455	459	516	500	467	511	467	388	409	379	427	440	447	443	377	355	325	597	417	444	509	466	467	462	466
20140217	0	159		163		202	162	185	227	217	237	252	277	203	140	142	215	267	247	236	69	311	269	258	299	233	283	56	221	183	356	198	182	157	177	158
20140218	0	36	41	30	45	33	35	44	66	45	47	46	47	47	35	65	45	62	47	57	41	50	41	91	60	80	60	32	45	35	54	32	38	31	32	35
20140219	0	78	67	103	70	116	93	124	114	105	73	87	117	77	56	53	103	81	104	112	111	115	104	171	114	106	96	61	71	40	54	76	66	118	65	94
20140220	0	144	121	134	139	131	129	150	72	120	166	150	151	141	106	118	131	193	122	108	166	187	142	81	51	20	181	105	98		141	143	130	128	134	130
20140221	0	311	223	324	278	295	320	339	293	291	357	379	353	455	247	222	316	326	288	284	236	300	279	229	300	219	202	191	319	270	334	285	277	318	288	340
20140222	0	249	246	252	234	264	253	328	311	277	319	276	270	338	274	340	425	271	273		279	272	272	302	357	264	180		384	263	274	282	262	273	272	349
20140223	0	210	198	203	211	207	216	214	222	207	242	237	216	233	203	214	228	238	238	198	225	249	241	250	328	236	168	208	212	161	200	215	218	207	221	208
20140224	0	211	185	209	231	222	245	270	221	248	251		219	217	212	235	266	255	222	229	319	247	249	208	332	214	211	263	269	171	195	181	196	226	236	248
20140225	0	326	309	357	350	284	326	377	312	318	430	329	369	423	353	316	546	376	329	326	356	359	334	368	368	268	258	312	395	299	323	336	337	304	359	334
20140226	0	477	422	476	476	489	492	492	417	419	536	477	340	510	518
20140227	0	25	19	16	24	20	28	22	13	12	23	12	8	8	20	19	159	144	23	10	45	169	71	49	25	18	3	31	118	33	49	20	21	23	21	24
20140228	0	43	50	43	52	34	38	47	61	28	100	61	53	70	62	91	104	79	33	45	34	32	35	94	43	19	3	47	103	55	184	48	49	37	60	34
20140201	1	162	144	152	158	144	161	158	137	127	157	157	140	152	144	160	190	185	118	116	202	170	202	164	111	130	96	164	160	151	138	173	152	152	145	150
20140202	1	143	123	137	136	123	135	143	143	148	133	141	142	138	142	133	108	118	125	156	120	116	113	166	157	139	115	93	88	101	135	150	131	134	133	114
20140203	1	7	4	8	8	3	13	5	3	5	8	7	4	6	8	7	17	4	8	6	12	11	6	15	3	7	3	23	33		11	8	4	6	10	5
20140204	1	3	3	5	3	3	3	3	3	3	4	3	5	3	6	6	37	6	5	8	12	5	6	4	5	3	3	22	21		34	9	4	8	10	3
20140205	1	70	78	70	67	63	68	109	82	77	98	142	105	128	71	69	89	172	44	82	54	50	63	57	38	40	3	46	115		150	82	89	72	88	60
20140206	1	130	113	112	143	167	132	157	170	121	146	160	135	186	136	130	160	160	120	126	127	132	135	162	125	103	97	83	90	140	178	147	135	126	146	119
20140207	1	79	71	71	74	74	78	73	127	76	74	81	78	85	80	77	90	100	144	106	102	125	90	155		110	93	101	101	77	90	81	75	70	80	69
20140208	1	79	73	70	80	73	84	75	143	101	73	70	80	72	62	84	97	140	123	105	147	129	144	155	154	107	119	131	78	65	72	94	75	75	79	85
20140209	1	8	7	8	5	8	5	7	9	7	12	7	6	7	9	4	10	12	7	9	5	6	7	26	5	13	23	5	8	10	7	12	7	9	8	7
20140210	1	9	9	12	11	5	3	13	23	24	23	21	17	36	17	13	12	8	14	21	10	52	3	33	12	10	3	15	26	125	120	48	8	11	11	3
20140211	1	77	59	75	85	72	58	78	70	52	110	96	68	127	99	85	147	126	50	56	59	49	60	94	72	40	29	44	146		132	79	79	82	99	56
20140212	1	188	160	180	179	194	215	167	159	138	242	150	132	236	207	193	268	229	113		198	109	145	154	125	51	71	133	273	180	209	190	180	186	196	205
20140213	1	231	238	227	249	222	211	156	133	88	203	180	110	180	246	243	177	182	198	90	183	203	190	122	149	96	148	135	178		202	246		214	251	200
20140214	1	230	234	229	240	232	219	221	244	200	246	237	212	238	263	247	211	210	262	221	156	212	232	237	231	206	170	110	117		296	253	235	224	227	221
20140215	1	560	541	445	655	525	781	486	374	296	653	327	339	398	694	513	615	425	287	306		268	332	302	311	267	260	308	690		554	614	568	437	764	599
20140216	1	444	418	457	469	488	430	468	453	411	485	436	444	431	533	489	473	462	386	388	378	424	436	422	431	372	367	320	657		418	496	448	450	441	428
20140217	1	135		138		141	135	161	277	231	163	274	247	195	162	168	231	229	248	274	47	290	172	259	268	244	241	51	235	189	389	153	141	137	170	138
20140218	1	31	36	35	44	37	32	32	75	44	41	46	50	55	40	44	60	56	57	55	44	42	40	74	55	76	40	35	58	33	57	43	42	32	39	33
20140219	1	99	68	118	80	131	102	124	115	104	77	85	117	91	59	54	106	85	106	111	119	123	121	132	120	64	90	65	80		60	76	69	128	65	111
20140220	1	120	112		142	131	130	150	58	119	167	158	160	142	122	138	136	150	142	139	149	157	159	68	59	27	103		97		123	145	121	131	143	128
20140221	1	326	222	316	275	291	295	338	330	311	357	351	327	449	229	263	302	298	303	282	255	296	314	251	315	229	210	186	321		333	274	275	314	273	327
20140222	1	296	218	278	280	313	279	336	320	268	316	254	269	309	393	312	342	283	322	281	288	260	242	295	358	260	184		457	286	272	285	266	297	287	314
20140223	1	199	198	196	200	205	207	213	207	208	243	234	211	229	202	209	220	233	223	200	224	242	232	273	321	235	209	223	206		202	216	206	195	200	176
20140224	1	233	187	219	195	228	249	274	220	236	248		230	216	241	245	281	246	250	240	330	254	276	201	338	194	208	264	296	179	195	177	212	230	221	254
20140225	1	333	281	359	368	377	326	377	312	318	430	329	369	423	353	316	546	376	329	326	356	359	334	368	368	268	258	312	395	299	323	336	337	304	359	334
20140226	1
20140227	1	13	11	17	13	15	25	14	12	16	16	11	12	6	28	16	46	7	13	8	45	20	38	14	13	17		61	89	9	11	18	17	19	26	19
20140228	1	38	46	47	59	39	34	55	71	29	73	73	59	91	92	61	183	101	27	40	45	24	45	84	32	17	24	52	121	123	143	46	52	47	59	30
20140201	2	163	148	157	154	138	158	153	148	138	161	160	145	157	144	171	183	192	141	120	198	143	179	152	123	139	94	162	185		143	178	154	152	152	149
20140202	2	145	129	144	145	130	144	156	141	156	154	150	144	147	144	143	118	125	124	160	143	123	116	151	162	152	109	106	90		144	160	148	135	147	122
20140203	2	6	9	8	7	10	13	4	8	4	6	7	4	3	36	13	34	3	9	3	4	7	7	6	5	3	5	23	33	29	34	6	3	8	7	8
20140204	2	3	3	7	6	5	6	3	4	3	3	4	3	7	5	4	22	3	6	5	14	8	16	4	4	5	5	14	26		48	5	4	3	5	3
20140205	2	65	70	72	71	58	55	128	97	87	99	152	111	130	88	56	89	157	40	83	44	53	45	69	38	44	16	53	106	117	168	82	86	75	86	56
20140206	2	128	120	158	136	161	157	170	160	146	170	157	129	194	145	114	189	167	121	129	156	138	133	159	136	101	92	77	88	126	187	139	131	157	138	161
20140207	2	67	70	76	75	64	87	74	87	78	84	84	76	89	81	93	92	100	110	95	106	107	87	178		130	96	106	100	78	95	78	71	71	78	90
20140208	2	74	75	71	70	69	78	71	141	122	69	76	78	76	65	78	97	141	133	143	134	139	135	147	157	111	110	113	73	61	72	98	73	70	68	75
20140209	2	7	9	7	5	10	6	11	11	8	11	6	7	5	8	6	9	11	9	6	3	6	3	18	10	7	8	4	11	10	8	11	8	12	8	6
20140210	2	11	9	11	14	8	3	13	52	19	15	20	16	20	13	18	8	9	14	14	7	10	3	28	13	11	3	15	14		110	30	10	11	14	6
20140211	2	80	65	79	89	86	72	73	79	55	91	76	59	109	125	95	154	141	42	55	63	48	71	100	75	37	11	50	162		166	94	93	74	99	69
20140212	2	212	177	184	187	175	237	166	164	149	213	131	134	212	231	185	329	178	102		184	110	132	197	118	47	57	140	304		213	208	185	181	210	218
20140213	2	190	189	210	216	187	178	235	165	103	257	214	97	217	222	207	166	166	179	94	178	197	204	140	144	133	189	128	175	258	220	203	193	200	213	173
20140214	2	241	237	222	242	221	220	224	255	191	239	236	210	214	295	248	174	201	250	225	148	209	233	254	227	209	177	109	136	168	307	260	237	218	230	222
20140215	2	555	518	387	588	461	581	433	368	300	524	324	308	355	573	612	592	372	256	297		271	348	306	290	269	268	322	727	467	390	541	539	391	713	563
20140216	2	445	410	433	458	478	424	451	446	400	449	415	413	443	531	473	504	455	379	382	363	420	432	446	434	322	389	321	575		374	483	442	424	444	402
20140217	2	85		106		123	108	139	254	223	159	274	189	189	191	135	115	237	254	274	64	243	151	255	269	232	228	49	183	188	214	121	113	127	124	146
20140218	2	35	33	38	37	41	32	28	87	48	36	43	57	52	38	37	75	47	51	55	47	45	33	47	65	64	38	37	75		67	44	40	32	49	39
20140219	2	126	62	122	87	100	115	129	113	110	83	110	114	93	72	55	92	83	114	120	163	124	114	162	120	25	79	58	71		63	111	72	120	69	110
20140220	2	142	115	112	144	139	117	134	142	126	171	166	169	168	141	132	128	128	155	106	123	129	153	85	85	39	112	94	111		155	146	136	113	141	133
20140221	2	285	221	288	284	294	264	348	296	318	393	334	323	413	207	277	362	302	297	278	237	284	315	250	354	232	214	173	318		324	269	271	271	268	305
20140222	2	294	267	301	295	263	293	301	310	265	318	282	289	313	310	319	327	302	290	270	273	255	243	281	323	252	160		412	294	238	289	284	302	286	311
20140223	2	194	195	197	183	197	194	209	210	202	227	226	212	225	187	203	221	232	218	198	218	236	226	257	327	224	269	208	208	193	202	212	200	196	190	172
20140224	2	223	213	228	262	225	225	249	226	235	260		229	223	208	225	278	266	252	240	356	246	278	212	350	196	206	266	330	197	202	230	201	237	224	233
20140225	2	309	310	360	364	412	414	352	294	314	426	348	344	380	384	318	454	389	315	318	332	323	342	370	357	280	236	320	408	282	291	342	318	317	359	419
20140226	2
20140227	2	14	16	17	11	18	8	13	12	7	16	14	12	3	21	14	7	14	16	9	22	11	12	9	9	19	147	26	12	15	12	14	14	11	11	10
20140228	2	46	47	54	65	70	98	62	60	41	92	88	95	88	82	64	114	80	30	31	51	28	36	76	19	25	3	40	136	103	151	56	54	51	68	115
20140201	3	154	144	152	156	138	150	149	154	144	161	157	143	153	148	172	175		130	119	211	152	165	150	126	143	87	159	190	146	149	167	157	146	153	152
20140202	3	151	141	151	157	137	151	165	140	155	162	160	151	151	148	147	123	129	116	158	156	130	127	141	155	205	117	113	98		145	175	156	144	155	129
20140203	3	3	3	5	3	6	7	4	3	3	9	4	7	7	3	20	26	8	6	3	11	7	3	5	3	7	6	25	23		31	3	6	4	5	7
20140204	3	6	3	3	4	3	3	3	6	4	5	4	7	3	3	3	7	5	7	3	9	4	28	4	6	3	34	7	18		42	4	4	3	11	3
20140205	3	60	66	59	79	85	54	105	91	90	83	153	110	118	100	70	98	108	38	80	42	52	32	54	53	46	6	62	98	109	161	79	73	63	86	53
20140206	3	167	118	162	129	154	183	167	166	139	173	138	135	176	123	95	186	166	141	124	111	132	124	148	136	104	120	74	91		205	145	128	158	136	176
20140207	3	75	78	76	76	68	96	82	85	77	89	85	83	88	83	106	94	101	103	93	101	108	88	154		131	91	110	97	81	107	78	75	70	76	96
20140208	3	74	67	78	68	92	79	135	140	133	73	82	80	83	68	77	95	141	136	143	149	140	142	139	161	117	108	94	71		77	93	73	79	70	70
20140209	3	10	7	8	8	8	6	6	9	11	13	4	9	4	6	10	6	8	13	4	3	6	8	17	10	9	3	3	11		5	8	7	8	10	10
20140210	3	10	4	12	6	8	3	15	46	17	14	18	13	15	14	19	11	14	14	10	9	8	3	22	13	10	3	21	9		115	19	9	13	11	9
20140211	3	84	85	69	83	109	93	68	88	56	86	70	54	111	123	97	166	97	39	43	55	45	51	100	51	45	30	51	175		161	93	89	81	97	96
20140212	3	225	193	185	201	168	228	158	160	141	171	121	133	183	259	227	271	150	97		180	109	120	175	122	51	88	144	284	164	202	213	198	183	201	189
20140213	3	179	173	178	190	169	172	203	202	120	212	223	179	219	190	196	160	150	163	96	175	184	201	153	173	199	185	119	157	197	204	183	174	179	186	160
20140214	3	233	231	209	235	222	226	235	264	193	235	235	225	214	273	256	166	182	213	229	146	206	227	258	210	209	171	100	144	174	275	241	230	205	226	220
20140215	3	490	491	411	508	414	527	414	379	297	418	332	304	327	547	630	530	355	250	288		262	316	311	310	275	246	331	675		353	502	478	393	519	532
20140216	3	456	421	430	443	456	422	449	447	398	439	419	396	428	506	469	500	430	364	372	400	401	409	456	413	279	342	308	540	509	362	468	433	426	438	392
20140217	3	112		75		81	103	81	284	180	112	214	169	154	148	158	130	140	219	237	122	222	198	205	263	204	198	45	156		230	113	135	77	106	149
20140218	3									49	46			51		58		54			45			42									38
20140219	3	111	69	114	122	100	111	124	111	114	114	126	111	85	67	55	108	83	105	119	98	116	113	73	107	15	76	54	82		67	117	99	108	103	106
20140220	3	150	120	116	154	140	120	156	146	121	178	157	174	176	144	144	104	111	153	90	104	154	149	88	79	63	118	75	121	129	160	151	145	117	154	132
20140221	3	290	204	239	245	305	267	353	308	312	392	314	319	367	220	256	397	294	285	268	226	283	306	244	351	236	216	170	317	255	312	252	243	231	239	317
20140222	3	281	274	312	257	278	293	291	310	260	319	290	284	294	268	324	335	267	265	269	235	242	231	294	284	250	147	219	444		237	285	283	301	282	274
20140223	3	193	187	188	181	189	187	205	209	198	219	201	195	199	178	200	207	217	207	215	250	227	239	246	323	206	246	179	198	183	172	202	194	196	192	168
20140224	3	219	192	231	265	228	220	247	221	228	273		222	224	209	204	268	261	226	233	357	312	251	209	336	198	214		331	194	206	255	224	238	240	263
20140225	3	337	294	378	360	427	428	371	286	314	428	349	310	385	495	359	430	376	306	311	333	329	321	384	339	289	265	350	410	290	328	314	359	337	368	425
20140226	3
20140227	3	17	18	18	9	15	18	17	12	12	16	9	8	3	19	14	8	11	17	11	14	3	6	12	10	17	3	9	32	12	9	16	15	15	22	13
20140228	3	132	76	75	81	111	142	74	59	56	120	66	75	73	73	122	65	48	49	25	48	23	31	64	27	27	17	35	141	111	170	73	75	71	75	109
20140201	4	153	150	154	155	145	157	161	161	141	156	148	140	150	145	176	168	186	140	130	200	158	164	153	123	143	115	157	179	140	133	173	154	148	156
20140202	4	163	140	162	162	146	158	169	137	147	164	167	154	161	160	158	131	140	124	161	160	125	130	155	153	233	111	122	118	140	152	184	170	155	157	135
20140203	4	3	7	6	5	6	8	6	4	5	5	7	3	4	4	6	24	5	3	3	4	3	3	3	6	3	3	30	23		24	4	3	5	8	3
20140204	4	3	3	5	5	4	4	3	5	5	3	5	3	3	7	6	11	8	3	5	5	3	21	8	6	3	3	7	19	8	18	7	3	6	5	3
20140205	4	69	66	77	88	137	63	107	88	93	91	128	93	116	97	80	141	65	39	80	35	41	32	53	51	49	24	83	82	115	149	84	80	85	87	58
20140206	4	170	129	157	138	148	189	153	163	139	168	135	128	167	152	86	163	138	145	116	112	129	121	143	131	107	116	72	95	104	190	179	143	152	147	174
20140207	4	89	99	86	88	82	99	86	83	89	86	88	89	98	84	110	103	107	99	90	101	109	84	139		104	91	99	97		121	103	97	81	93	89
20140208	4	77	69	125	70	112	78	159	140	129	81	84	106	87	73	73	76	138	136	140	168	137	142	129	148	112	128	98	70		85	93	72	134	77	72
20140209	4	9	5	6	5	5	5	7	6	12	8	6	4	3	5	7	8	6	9	7	4	7	5	12	7	13	8	3	8	7	7	4	7	9	8
20140210	4	9	8	12	13	11	12	12	41	16	13	14	11	17	12	17	5	6	17	17	22	11	3	24	14	13	3	14	7	78	113	13	9	11	11	14
20140211	4	110	83	82	87	100	112	81	89	55	83	63	47	80	155	129	163	86	34	43	44	49	41	92	44	44	17	50	145	138	148	103	87	89	105	139
20140212	4	178	197	162	183	155	197	152	170	138	189	115	110	149	283	255	264	137	90		156	102	113	150	110	58	134	151	288		204	187	178	157	191	161
20140213	4	157	158	171	172	159	157	192	187	178	195	201	181	213	173	177	158	144	156	134	171	167	196	158	207	190	180	131	157	177	180	165	157	174	167	144
20140214	4	226	214	203	223	230	234	236	271	183	216	232	223	213	247	246	156	178	184	228	141	195	216	236	215	210	172	104	145	161	250	219	207	207	221	227
20140215	4	421	463	366	486	332	479	356	379	296	401	320	294	322	533	584	475	343	257	285		265	299	313	297	278	208	327	616		375	458	447	325	468	451
20140216	4	432	413	439	437	435	411	462	448	396	452	413	391	404	437	464	482	419	346	352	360	390	389	448	400	283	343	315	507		391	448	420	432	421	384
20140217	4	54		86		74	62	86	279	145	113	181	155	159	154	108	105	87	191	198	201	242	152	175	237	167	216	53	139		147	88	93	90	85	81
20140218	4	41	44	35	40	43	54	35	69	44	42	60	44	54	50	68	77	53	47	61	42	55	46	44	71	45	45	42	70	38	66	47	50	34	42	68
20140219	4	98	81	100	106	91	103	108	127	111	115	128	109	105	82	60	111	82	79	121	114	111	114	31	55	13	99	66	81		78	102	101	95	110	101
20140220	4	153	151	125	136	124	126	142	163	91	164	163	173	174	148	150	131	111	126	141	105	135	141	83	77	86	160	76	114	122	163	151	149	124	156	134
20140221	4	286	206	216	212	304	286	350	307	295	366	322	314	333	244	308	358	296	270	274	226	291	284	235	351	231	171	182	307	244	299	255	249	231	248	306
20140222	4	273	277	262	254	304	257	295	306	247	344	290	293	307	298	289	323	251	237	264	237	241	219	274	291	244	183	217	397	308	270	294	286	282	283	244
20140223	4	180	179	187	184	191	181	197	196	181	216	191	187	191	178	185	186	200	210	202	234	215	211	250	301	215	230	197	191		154	195	182	189	179	174
20140224	4	219	212	230	252	231	260	245	220	227	263		221	225	200	263	281	254	249	228	340	285	247	211	306	187	220		335	191	201	258	228	234	241	250
20140225	4	383	313	390	383	422	445	376	290	322	424	319	337	345	430	325	457	376	302	311	327	335	312	361	340	306	284	343	458	292	330	382	360	351	375	432
20140226	4
20140227	4	15	18	13	12	14	14	10	11	14	10	10	8	3	9	13	9	13	14	11		10	6	15	14	17	3	13	14	9	11	11	12	14	14	14
20140228	4	93	82	118	94	68	64	102	58	53	120	47	69	56	115	75	50	44	61	30	42	29	30	56	20	25	3		55	85	139	82	88	92	103	54
20140201	5	159	152	162	161	153	157	181	167	136	159	146	131	138	147	179	185	194	152	139	222	150	147	143	141	134	101	171	166	147	132	173	162	157	158	149
20140202	5	163	150	170	163	151	157	172	136	143	170	171	167	163	172	176	143	145	137	163	156	134	137	188	157	237	128	134	156		152	186	163	161	168	136
20140203	5	3	5	7	3	3	5	3	3	8	5	4	3	7	3	6	7	7	5	4	8	3	4	3	6	5	3	11	21		14	4	3	5	6	5
20140204	5	6	5	3	3	3	3	3	8	3	3	3	3	4	7	7	8	3	7	3	5		15	6	9	6	3	5	13	3	17	5	4	4	9	5
20140205	5	86	64	104	97	142	74	110	85	84	95	97	84	148	98	89	146	48	40	77	36	35	30	56	47	56	53	71	63	95	121	96	90	137	95	73
20140206	5	164	143	152	162	141	168	148	160	131	163	137	126	130	157	131	149	121	126	110	100	123	115	137	133	106	107	74	99	95	170	170	161	147	153	165
20140207	5	100	95	97	103	91	99	94	87	87	104	93	87	89	98	104	98	112	95	95	100	108	92	116		96	77	89	89	93	137	108	100	91	103	92
20140208	5	124	73	127	82	116	98	156	141	112	111	92	130	73	76	73	84	143	143	135	172	145	135	125	128	101	127	95	72		91	110	76	123	84	73
20140209	5	3	5	10	6	8	6	8	11	8	9	7	6	3	5	8	6	4	10	4	5	11	3	11	9	11	3	3	6		5	9	6	9	7	7
20140210	5	11	10	13	12	12	14	15	36	15	14	17	15	15	14	11	4		15	15	24	9	3	28	10	12	3	14	8	38	117	14	12	16	17	6
20140211	5	109	88	79	103	100	120	73	82	51	79	50	53	65	168	132	212	69	42	37	45	48	37	93	42	46	39	46	150	146	133	114	106	88	106	130
20140212	5	140	164	152	153	163	131	150	173	141	181	101	105	141	212	232	232	123	85		158	106	109	137	74	69	78	157	288	177	187	142	136	154	134	138
20140213	5	142	142	151	161	146	142	215	183	185	175	181	192	196	161	167	166	151	154	159	156	169	187	180	189	178	159	148	166		178	146	147	152	155	131
20140214	5	220	209	209	217	226	232	239	259	187	211	225	220	218	225	237	163	216	192	226	132	196	198	241	210	197	140	102	139	170	235	221	202	218	201	230
20140215	5	362	395	318	369	328	393	317	381	293	374	307	296	326	548	491	429	320	270	276		268	289	314	300	272	244	326	597	509	361	364	351	296	366	416
20140216	5	409	398	416	436	425	391	442	430	406	441	367	431	390	400	431	457	406	332	345	338	373	372	421	387	315	329	313	521	497	372	437	400	399	413	359
20140217	5	46		44		42	55	50	288	97	86	166	120	144	97	88	130	138	135	164	153	240	152	189	218	180	215	71	140		101	62	61	50	45	51
20140218	5	50	60	41	58	47	54	39	63	39	57	55	56	52	68	67	69	47	47	59	46	51	39	41	61	41	49	42	80		59	64	61	44	59	59
20140219	5	90	83	90	92	86	97	109	127	104	108	119	111	121	83	94	124	90	30	120	105	106	109	37	38	11	107	91	87	49	81	94	93	92	94	92
20140220	5	133	146	130	137	129	129	176	144	120	179	175	160	171	143	128	112	114	101	153	94	128	134	79	95	95	142	92	119	116	168	159	153	125	151	137
20140221	5	261	235	247	221	281	272	349	313	282	356	298	310	334	252	291	328	279	287	286	201	278	264	225	355	234	199	172	305	238	297	241	235	274	238	286
20140222	5	241	261	274	253	292	243	300	302	231	326	284	279	295	275	295	336	242	269	260	287	240	214	253	299	244	169		363	320	259	265	269	266	271	212
20140223	5	178	168	167	172	175	168	190	192	178	206	197	186	190	172	180	185	201	200	196	231	204	204	241	292	198	248	222	187	157	144	180	177	178	175	163
20140224	5	228	220	224	262	223	226	234	221	222	253		221	228	228	269	284	252	233	219	358	267	237	207	295	187	213	216	335	195	213	260	230	231	247	226
20140225	5	394	310	403	384	416	443	371	308	321	419	330	337	341	358	374	458	365	283	286	327	320	309	341	342	325	289	338	447	289	349	380	355	358	355	424
20140226	5
20140227	5	14	11	15	14	12	18	11	12	9	15	9	7	10	11	12	9	6	13	9	6	14	5	8	7	20	3	16	8	9	7	11	10	10	13	14
20140228	5	47	44	60	53	44	45	77	73	76	93	77	89	107	114	50	49	38	52	53	45	46	21	43	27	40	5		34	80	132	43	49	58	53	40
20140201	6	168	156	165	171	148	161	177	159	129	158	155	135	139	152	184	194	188	152	146	221	146	138	149	147	147	81	162	156	148	137	177	163	168	169	147
20140202	6	158	145	169	164	151	149	174	138	141	175	175	167	167	176	181	159	138	137	162	152	140	144	182	174	228	116	129	177	170	149	179	166	156	172	132
20140203	6	6	8	5	5	3	12	4	4	7	4	4	5	3	3	3	8	3	3	6	5	5	6	3	3	3	6	8	8	6	4	25	7	9	3	4
20140204	6	6	3	6	4	6	5	3	4	4	8	3	7	3	3	7	9	3	6	4	15	3	14	9	3	4	3	14	9	6	24	10	6	8	5	4
20140205	6	102	85	137	103	114	104	105	86	87	113	96	79	138	93	98	120	41	47	70	34	41	27	56	47	56	3	63	57	61	79	109	101	137	101	96
20140206	6	152	147	151	155	126	153	152	172	128	156	123	128	127	137	136	155	128	101	116	98	129	119	146	129	104	119	81	102	114	150	158	156	133	154	147
20140207	6	103	96	103	104	96	103	108	99	83	115	100	94	89	107	104	85	103	98	96	108	96	103	117		104	107	95	86	98	143	110	105	98	104	94
20140208	6	120	90	132	110	121	96	151	142	109	125	89	134	82	77	81	87	143	146	129	136	144	135	126	127	55	116	101	81	72	90	140	104	123	86	82
20140209	6	10	7	4	6	9	11	10	12	8	9	9	9	3	9	8	9	7	9	6	6	9	3	8	9	12	3	4	5	7	5	5	6	10	5	6
20140210	6	8	5	9	14	8	7	14	36	11	15	14	16	19	14	13	6	7	11	16	19	8	4	38	12	9	3	14	11	24	79	10	14	11	19	11
20140211	6	114	95	89	98	72	115	84	76	52	67	46	57	68	152	153	172	56	50	41	43	44	34	85	39	61	32	52	152	153	111	109	101	86	110	109
20140212	6	145	137	151	144	169	121	145	173	145	162	99	105	138	180	173	160	109	86		156	108	103	124	53	58	68	150	279		159	143	136	161	133	114
20140213	6	148	152	138	153	135	144	210	192	175	164	175	197	186	152	170	168	164	149	166	161	158	184	183	179	176	163	155	166		184	156	144	142	154	141
20140214	6	232	214	201	215	215	228	231	253	186	212	227	220	221	240	220	165	225	190	230	136	185	188	251	209	191	145	103	139	177	243	235	218	208	201	226
20140215	6	322	315	309	332	307	358	322	390	298	330	293	292	303	409	408	417	325	272	271	328	277	274	311	309	266	252	347	554	512	352	329	319	292	330	370
20140216	6	394	391	409	408	407	377	426	431	393	426	360	422	371	395	404	436	379	294	343	364	359	357	395	305	292	345	308	487		350	421	389	395	390	349
20140217	6	51		43		45	63	49	275	80	49	91	95	154	72	79	99	132	99	173	106	215	154	182	196	177	243	59	101	108	114	56	56	43	59	53
20140218	6	50	69	52	63	50	54	37	61	41	65	59	59	57	61	66	81	56	50	66	47	54	44	46	64	35	57	47	73	47	59	69	66	54	68	53
20140219	6	79	80	77	83	87	94	122	125	67	81	121	102	110	87	113	136	120	23	115	95	109	109	39	16	8	93	86	88		92	84	80	79	80	89
20140220	6	137	128	161	167	121	134	167	152	151	162	157	166	172	128	133	132	138	107	153	97	137	120	71	104	104	146	113	112		161	167	159	155	163	141
20140221	6	269	227	223	219	259	271	375	304	295	291	312	304	332	263	272	316	281	293	287	206	301	251	212	352	223	240	165	274	242	278		219	250	221	278
20140222	6	241	238	230	241	272	235	310	283	224	320	280	280	280	268	276	320	244	288	263	258	237	210	242	319	247			339		246	242	238	236	250	204
20140223	6	168	163	167	164	166	167	182	201	179	198	192	178	187	171	179	189	203	186	171	232	202	192	241	284	190	209	220	178		140	175	171	176	177	163
20140224	6	226	219	217	246	211	219	222	213	217	251		217	224	197	273	275	237	224	222	360	255	229	214	285	182	212	236	318	205	206	255	229	220	251	241
20140225	6	399	328	394	396	413	418	366	302	326	431	344	332	349	384	370	446	346	323	283	355	310	300	320	346	335	280		404	318	347	402	337	350	365	405
20140226	6	445	383	428		426	466	472	404				453		505		547			419			414					349	517
20140227	6	14	13	11	9	15	12	12	13	11	12	8	8	7	12	6	6	6	9	9	11	12	9	9	8	15	3	13	7	8	5	13	12	10	13	7
20140228	6	51	46	46	49	42	40	64	70	78	60	101	74	111	83	46	37	45	43	81	41	38	21	55	36	59	3		33	100	112	43	44	47	54	42
20140201	7	166	152	169	166	153	160	179	156	133	163	157	136	135	157	173	176	180	153	145	216	145	121	142	149	147	100	154	160		136	174	159	165	164	155
20140202	7	154	145	159	153	143	155	164	128	147	166	190	153	166	170	175	153	142	141	146	142	142	120	231	174	167	99	134	184	185	155	174	159	152	166	136
20140203	7	5	3	4	5	3	3	3	3	5	3	6	3	3	7	3	5	3	4	6	3	5	7	3	3	3	3	3	3		5	9	7	7	4	3
20140204	7	4	3	5	6	5	3	4	3	5	6	7	8	3	6	5	7	5	6	3	46	5	12	6	7	6	5	11	8		32	8	6	10	4	7
20140205	7	121	87	128	112	92	105	91	81	78	120	91	79	150	80	95	89	41	52	58	40	36	23	51	43	55	28	65	56	54	68	120	97	123	105	122
20140206	7	140	145	122	144	119	138	131	152	113	156	129	118	137	119	147	161	119	103	126	102	127	118	126	121	110	88	78	110	99	149	151		122	148	142
20140207	7	88	85	97	98	90	86	108	102	97	113	111	105	108	100	97	89	100	100	106	97		104	117		105	109	91	81	99	127	96	93	95	99	78
20140208	7	132	110	122	117	127	108	139	146	110	123	98	131	85	80	87	96	145	139	132	147	146	139	125	129	19	118	121	84		83	144	115	126	94	101
20140209	7	8	6	11	9	7	10	9	10	8	9	5	9	3	10	6	8	11	8	6	6	5	3	14	10	15	11	7	8	8	7	10	8	11	10	5
20140210	7	9	8	10	8	8	8	20	34	14	12	16	15	33	24	11	8	7	16	18	22	11	4	33	13	12	3	16	16		52	12	8	15	21	13
20140211	7	94	97	83	93	58	101	86	84	49	77	54	51	67	114	171	177	44	45	38	47	44	32	79	39	63	43	54	151		107	107	95	78	109	85
20140212	7	122	129	150	143	153	109	149	174	144	163	103	88	125	150	156	120	93	109		157	101	59	113	34	54	64	148	294		129	140	130	152	138	108
20140213	7	159	163	150	165	151	155	195	189	187	158	192	197	170	153	175	162	162	144	157	169	160	160	178	169	186	211	166	171	160	191	168	162	145	173	145
20140214	7	212	215	196	214	208	192	223	262	177	203	228	224	216	250	214	183	232	170	229	156	186	187	254	205	201	158	107	138	194	251	226	214	205	206	213
20140215	7	320	307	311	326	302	358	337	383	322	333	289	300	291	351	354	418	333	276	265	338	282	278	285	315	257	264	330	529	550	341	326	301	296	312	338
20140216	7	370	366	403	391	403	360	410	440	363	419	363	392	375	383	386	413	346	297	330	324	358	346	395	147	239	340	302	492	420	328	401	369	396	375	341
20140217	7	64		48		55	64	45	257	67	54	85	111	126	75	78	104	128	118	189	110	204	139	158	213	167	186	56	98	90	118	62	57	48	61	64
20140218	7	54	71	58	59	50	63	49	61	45	78	62	55	62	69	81	87	62	55	74	51	54	44	54	66	47	31	55	81	52	61	74	72	56	71	63
20140219	7	71	65	67	66	96	92	111	124	42	75	125	82	135	101	106	109	124	20	107	96	101	109	102	19	13	97	86	104		103	70	68	74	70	92
20140220	7	166	132	163	169	128	136	158	149	146	187	163	150	180	143	146	160	148	128	137	109	137	126	69	117	99	159	117	136	181	155	169	162	162	170	148
20140221	7	247	216	223	212	239	286	364	315	306	286	311	301	322	217	240	297	282	324	279	190	299	244	206	346	223	252	171	241	244	254	234	218	250	230	264
20140222	7	216	212	233	229	276	219	323	288	216	302		275	283	254	242	293	233	290	261	233	239	208	241	293	243	194	222	309		241	257	249	243	247	205
20140223	7	176	168	168	136	180	168	178	190	174	200	184	176	185	173	181	198	205	183	187	225	205	190	225	272	194	200	232	171	160	146	183	175	170	176	147
20140224	7	220	218	211	251	199	228	220	223	210	247		215	229	239	269	263	284	235	221	315	251	232	215	274	177	214		283	238	223	234	228	212	243	256
20140225	7	375	313	387	401	394	407	404	304	325	437	344	332	392	431	373	441	357	318	282	344	307	299	322	336	337	260	339	418	294	348	393	390	372	389	356
20140226	7
20140227	7	16	21	11	11	16	10	11	10	14	12	10	9	3	13	6	7	11	11	9	9	17	3	10	8	18	3	6	8	13	5	16	17	15	15	6
20140228	7	52	49	48	55	44	47	65	68	88	63	83	67	88	76	42	44	44	45	82	39	41	26	55	48	58	36		34	93	105	55	48	49	49	45
20140201	8	173	156	162	162	150	170	174	160	142	161	155	140	140	157	179	171	175	160	142	202	130	119	154	152	146	102	143	171		137	174	161	159	170	152
20140202	8	147	135	156	152	136	141	167	133	137	158	147	149	150	168	164	143	132	134	145	124	125	106	235	99	80	105	123	177		147	166	156	150	151	122
20140203	8	3	6	10	3	4	3	5	3	5	7	5	6	3	6	3	3	4	8	7	4	7	7	3	9	8	3		3		3	4	4	5	3	4
20140204	8	11	4	9	8	11	6	9	7	8	6	7	4	8	7	14	8	6	4	3	75	25	16	16	8	10	3	12	15	25	59	11	11	11	14	5
20140205	8	124	94	107	111	65	126	75	80	80	117	89	87	141	73	91	101	40	50	59	55	39	32	53	59	52	13	73	60	50	100	132	107	89	108	117
20140206	8	127	132	120	142	116	134	134	154	112	141	129	123	130	138	158	160	113	118	125	99	128	117	122	158	105	108	75	116		140	145	144	116	144	137
20140207	8	92	92	92	97	86	96	99	114	101	103	110	110	102	89	95	86		97	114	91	89	98	130		105	122	80	75	91	95	103	96	89	97	86
20140208	8	121	123	127	122	128	126	140	146	99	140	118	129	92	84	95	97	141	117	129	129	135	140	104	139	10	87	121	104	71	82	148	123	129	107	106
20140209	8	12	8	17	6	7	8	12	10	12	10	9	7	5	11	10	9	13	11	10	6	6	6	19	10	16	8	8	9	12	5	8	7	11	20	8
20140210	8	11	6	10	10	12	13	29	37	13	16	23	18	25	18	19	7	9	16	19	28	11	5	35	11	16	6	8	25	28	53	6	9	10	27	17
20140211	8	69	69	68	83	55	81	89	87	56	101	56	52	60	89	151	136	41	52	42	50		38	85	49	61	32	64	150	154	112	81	80	64	93	69
20140212	8	113	113	135	136	147	103	157	171	142	155	100	102	119	145	129	112	61	123		150	97	31	116	34	50	48	148	262		131	121	123	142	127	110
20140213	8	167	169	159	174	158	161	181	196	185	176	192	193	168	157	175	154	172	144	152	169	166	163	184	171	180	167	159	171	154	183	173	167	159	177	150
20140214	8	177	193	192	207	205	173	228	262	160	197	230	224	214	247	200	192	234	172	230	190	189	200	248	201	212	183	115	151	204	254	216	203	191	207	217
20140215	8	320	307	309	320	307	331	344	384	297	333	291	279	307	330	342	412	310	278	261	333	281	282	307	322	269	300	330	493	536	326	326	306	301	309	294
20140216	8	362	340	394	370	358	331	409	425	257	412	366	397	386	355	367	413	281	314	316	320	349	306	347	127	225	295	265	471	383	335	384	349	386	355	310
20140217	8	55		59		59	68	44	231	56	47	63	106	121	71	78	125	138	180	166	107	200	150	164	205	133	212	64	105		97	66	65	55	75	77
20140218	8	62	76	56	63	56	69	54	65	49	82	65	61	71	80	86	88	72	59	77	58	57	54	58	74	50	39	61	80	56	62	80	77	60	78	72
20140219	8	63	66	55	47	68	103	100	125	22	57	106	44	140	86	110	114	110	28	92	90	115	110	55	19	15	77	92	117	73	115	66	63	55	56	113
20140220	8	141	138	146	177	143	140	163	122	141	201	171	150	170	157	156	177	154	144	134	138	125	147	99	138	103	124	144	133	185	159	170	171	167	175	155
20140221	8	218	211	243	247	216	282	346	293	301	356	315	296	317	218	234	298	278	326	271	207	291	235	192	351	226	214	169	223	246	251	230	225	241	227	258
20140222	8	233	228	237	267	274	234	304	289	216	291		275	291	219	236	271	227	278	267	225	236	197	236	293	242	189	225	310	293	238	271	235	247	259	221
20140223	8	188	179	154	150	189	159	193	201	171	201	186	190	181	172	182	198	211	184	163	223	210	191	199	245	209	198	205	174	163	146	183	184	181	183	154
20140224	8	212	213	208	259	198	253	218	225	208	245		228	242	261	273	289	256	229	218	300	243	233	214	279	183	297	234	257	246	229	249	228	233	223	278
20140225	8	348	331	374	379	346	383	397	301	326	436	317	345	374	435	358	435	350	296	307	371	310	299	301	334	340	253		443	328	344	352	366	358	380	326
20140226	8	449	373	438	434	426	456	482	402	415	511	460	463	476	464	447	545	495	448	417	431	410	420	462		429	369	444	473	523	391	429	425	422	431	427
20140227	8	12	16	17	15	13	6	12	19	15	17	10	12	3	15	9	10	11	13	9	12	18	7	13	5	13	3	7	10	13	10	11	16	20	21	11
20140228	8	60	42	54	57	50	49	75	69	81	70	97	86	80	62	44	56	53	48	87	37	42	41	67	44	60	82		41	83	102	55	51	55	64	47
20140201	9	165	157	164	165	156	167	171	173	165	160	160	140	146	149	184	178	170	171	144	221	125	122	169	163	141	100	132	193		130	179	161	166	166	153
20140202	9	131	123	128	135	121	132	157	143	112	158	154	148	168	169	152	127	125	47	102	139	133	81	186	33	31	100	107	179		141	147	132	125	141	117
20140203	9	3	3	7	3	5	3	5	4	3	6	6	4	3	5	3	13	3	13	3	9	4	5	4	12	6	3	14	8	3	4	9	4	8	8	3
20140204	9	10	7	9	12	11	14	12	18	3	6	13	8	30	16	16	11	12	11	3	203	35	43	36	8	14	3	24	17	53	148	14	10	13	12	5
20140205	9	85	100	89	124	59	104	66	90	80	117	83	69	87	81	87	135	41	57	65	65	47	42	62	63	65	13	81	83	68	112	114	111	75	117	89
20140206	9	127	125	116	129	119	142	144	157	115	132	137	118	126	151	142	175		121	126	115	131	122	129		109	122	127	138	98	133	135	132	117	133	131
20140207	9	89	85	89	91	88	81	96	112	97	103	107	96	82	84	88	87	75	99	107	84	93	93	151	125	111	89	74	79		110	95	91	90	93	81
20140208	9	130	109	124	127	135	126	142	158	76	140	142	132	109	101	110	116	158	61	84	142	140	157	31	81	11	90	130	113	87	88	143	124	112	128	121
20140209	9	9	6	10	6	10	6	10	13	11	12	7	10	6	10	9	11	12	14	7	9	13	3	23	10	18	3	11	13	14	7	14	10	13	14	9
20140210	9	16	9	8	9	8	17	32	52	16	11	30	19	33	14	11	14	13	19	29	48	21	12	71	11	20	19	7	29	29	49	15	11	10	16	16
20140211	9	58		62	59	49	72	81	102	58	90	56	62	59	97	134	124	44	53	48	81	59	50	95	62	67	17	65	214	168	121	52	62	61	76	64
20140212	9	81	88	105	94	77	69	156	182	165	140	123	146	126	127	96	109	60	146		160	80	34	120	56	46	65	142	236		152	90	99	106	104	78
20140213	9	177	171	165	172	157	166	178	196	178	186	183	182	171	159	177	172	182	159	161	162	175	175	187	192	161	159	149	182		163	181	169	165	173	161
20140214	9	170	163	180	193	211	195	229	274	183	206	248	206	225	239	189	198	233	188	235	200	198	243	290	207	216	155	124	198		263	197	185	179	196	188
20140215	9	324	320	307	324	313	304	336	381	321	340	308	285	316	353	325	434	303	340	265	374	297	291	339	332	267	309	333	487	509	321	334	311	304	314	285
20140216	9	338	335	380	351	379	302	422	442	336	404	391	405	383	321	342	390	205	353	297	392	358	242	325	96	199	170	241	485	359	374	350	335	365	337	303
20140217	9	69	64	60	74	63	75	50	245	61	76	68	71	68	96	85	159	133	172	180	134	217	180	144	226	91	367	75	128	86	80	74	74	58	81	83
20140218	9	73	78	61	80	61	80	59	83	51	99	70	66	75	95	80	86	81	61	84	72	67	68	72	96	55	49	74	85	66	71	84	79	60	87	77
20140219	9	49	38	37	34	39	104	48	128	20	35	104	39	124	67	113	87	96	27	52	109	125	84	64	22	15		94	149	93	134	44	43	34	40	108
20140220	9	145	142	151	175	141	144	163	108	150	190	172	155	203	166	157	166	165	147	108	156	133	160	140	144	123	135		128	204	163	157	152	166	182	159
20140221	9	207	210	226	233	210	242	314	299	301	330	321	289		200	250	284	354	331	261	210	269	221	198	348	203	193	168	245		244	233	207	211	211	248
20140222	9	244	238	242	274	265	240	274	291	217	292		278	291	229	236	238	221	274	269	255	240	209	253	286	242	189	208	300	280	239	287	275	253	271	227
20140223	9	187	173	155	157	185	189	203	214	192	205	188	191	192	172	190	203	206	186	205	234	190	187	177	249	195	189	206	161	166	150	180	178	180	179	177
20140224	9	211	211	208	258	200	261	214	230					242	261	273	289	256	229	218	300	243	233	214	279	183	297	234	257	246	229	249	228	233	223	278
20140225	9	348	331	374	379	346	383	397	301	326	436	317	345	374	435	358	435	350	296	307	371	310	299	301	334	340	253	331	443	328	344	352	366	358	380	326
20140226	9	456	404	428	441	445	474	496	429	429	527	487	473	496	470	460	562	465	446	431	477	430	454	489		436	331		534	506	420	447	434	417	431	471
20140227	9	9	11	18	14	9	3	19	16	13	21	7	12	9	12	8	8	13	12	8	9	17	6	24	10	17	3	15	12	16	7	7	12	67	13	8
20140228	9	68	53	66	63	57	54	85	74	80	84	97	88	91	79	47		53	52	81	47	35	47	65	117	64	3	35	55	88	106	62	64	63	84	62
20140201	10	165	150	154	148	158	164	178	179	167	149	162	138	154	139	184	175	168	193	142	264	129	138	169	211	143	102	120	208	147	124	174	154	160	156	155
20140202	10	66	56	40	47	35	78	81	57	58	85	201	72	211	120	133	90	96	26	21	104	132	67	135	18	23	80	73	142		238	59	55	38	59	65
20140203	10	3	3	4	4	3	3	9	4	3	3	3	3	3	5	3	9	3	9	3	5	3	11	6	7	7	3	8	5	7	3	5	3	5	7	5
20140204	10	8	13	11	10	10	8	12	20	8	8	17	4	53	7	11	6	11	5	3	133	18	66	31	7	18		24	21	21	123	16	9	15	18	8
20140205	10	78	92	77	110	64	101	62	91	78	99	86	61	106	102	88	101	57	85	61	75	39	53	96	81	66	38	72	86	77	133	99	95	63	107	70
20140206	10	121	114	121	127	126	137	148	165	123	142	130	119	121	122	148	178	123	163	123	123	136	129	143		110	119	96	123		131	137	127	133	133	128
20140207	10	87	88	90	94	89	87	93	114	93	93	107	94	87	92	93	83	91	101	100	78	85	85	117	117	106	76	76	98		101	98	94	81	93	87
20140208	10	115	113	85	114	98	76	77	152	28	135	94	44	145	117	138	127	177	25	8	176	171	152	47	14	15	202	140	137		114	134	113	95	120	84
20140209	10	13	11	12	10	10	10	8	11	9	10	8	8	9	4	10	14	13	12	6	10	14	4	18	16	16	3	8	6		9	10	9	7	12	8
20140210	10	21	10	12	10	11	13	27	34	15	15	17	18	36	13	10	13	12	9	12	58	31	3	51	9	27	43	20	21	17	35	8	14	12	19	15
20140211	10	62	57	59	57	53	57	91	118	69	91	64	68	72	148	120	110	48	62	47	98	86	50	106	64	70	59	137	193		157	65	61	59	71	59
20140212	10		49	63	62	79	61	105	201	154	81	158	137	155	87	78	95	44	192	82	176	82	38	120	94	46	67	172	197		186		48	70	63	62
20140213	10	182	173	174	188	170	172	184	201	174	183	185	178	176	167		168	176	165	188	168	190	193	174	190	161	170	135	180		157	194	187	172	179	162
20140214	10	177	173	177	186	204	187	236	287	171	201	239	197	230	214	205	228	223	209	239	204	227	243	324	236	220	147	202	218	206	290	191	170	175	189	177
20140215	10	325	322	312	335	314	309	350	358	345	350	359	313	320	385	323	464	314	290	266	395	320	303	364	342	265	243	359	494		340	342	319	307	324	297
20140216	10	319	275	355	327	375	294	394	462	188	386	350	376	369	294	313	338	167	322	281	467	348	181	450	176	182	82	308	488	359	356	349	307	342	310	302
20140217	10	80	84	71	84	72	91	66	269	68	77	76	78	72	79	95	127	143	156	63	176	227	182	135	190	76	150	118	121	79	70	95	92	70	91	88
20140218	10	78	76	72	88	68	85		101	60	95	72	77	86	90	82	78	75	75	69	97	86	79	67	88	58	85	97	65		86	88	84	71	103	77
20140219	10	45	38	28	29	32	43	37	51	28	28	42	25	43	46	66	91	77	21	22	131	127	60	45	12	17	73	103	158	90	112	36	29	24	33	60
20140220	10	151	151	150	191	140	176	159	131		234	173	160	189	177	166	148	173	139	120	161	140	175	97	160	124	154	135	145	219	182	165	160	171	170	169
20140221	10	211	207	208	193	224	242	292	271	295	275	310	279	344	259	252	312	372	313	259	228	274	234	204	327	208	196		251		255	216	206	201	209	232
20140222	10	252	237	241	270	272	249	274	302	221	290		273	288	232	238	241	232	255	273	332	229	219	273	295	251	175		345	249	247	286	279	261	266	215
20140223	10	193	186	180	151	158	166	194	228	203	202	170	194	192	154	194	182	217	195	195	245	199	192	183	251	171		216	194	166	177	186	190	178	189	183
20140224	10	215	218		264	207	265	212	238	212	244	171	201	226	265	327	286	289	222	229	309	252	284	208	273	173	184		229	311	246	239		214	253	259
20140225	10	347	305		355	293	343	381	345	366	469	400	360	401	440	412	427	336	326	341	429	337	337	366	336	347	301	357	515	371	375	341	315	306	350	317
20140226	10	451	445	434	435	440	493	511	470	461	549	481	477	509	482	453	586	509	581	446	513	433	486	530		452	378	483	539	489	468	447	442	418	442	478
20140227	10	10	12	14	13	7	3	13	12	19	12	11	11	8	14	3	18	10	15	10	8	9	7	14	3	19	3		10	6	9	16	13	16	17	8
20140228	10	79	72	78	88	68	61	89	79	88	101	100	94	109	96	68		59	56	94		41	52	74	75	66	65	29	55	80	111	78	83	72	90	66
20140201	11	145	127	137	117	170	164	190	183	184	141	159	144	147	122	178	175	169	178	146	298	128	131	167	210	149	96	266	209		138	167	139	150	124	159
20140202	11	19	22	24	19	16	27	20	18	19	29	106	26	221	34	46	53	40	13	17	25	35	38	17	7	20	20	24	47	183	243	31	23	23	24	26
20140203	11	4	7	14	8	3	3	7	4	3	4	3	3	3	3	6	5	6	10	5	8	3	3	8	5	7	10	10	5		5	11	5	7	4	5
20140204	11	6	9	14	9	5	7	14	9	9	10	46	9	88	24	9	6	8	10	4	19	6	38	14	6	9	8	9	21		76	10	12	11	10	6
20140205	11	92	92	83	87	76	103	83	88	78	97	84	70	98	88	89	92	89	67	64	86	43	43	87	75	71	25	69	66	60	94	103	93	74	89	90
20140206	11	117	105	118	122	112	125	146	146	124	134	125	129	126	104	126	179	121	144	123	143	134	118	123		106	106	143	91		143	117	113	116	127	126
20140207	11	93	92	95	96	92	94	94	92	90	96	106	96	95	101	104	65	94	104	101	85	107	96	109	127	89	113	90	83	82	94	107	97	89	100	89
20140208	11	16	34	34	27	29	32	31	15	24	40	29	8	102	62	89	117	139	20	9	174	140	81	24	14	16	155	168	150	120	124	36	29	27	39	37
20140209	11	11	12	9	4	14	13	3	7	7	11	6	9	9	4	8	12	7	11	4	4	8	3	17	11	15		7	6	6	6	17	9	9	9	9
20140210	11	44	8	16	12	16	15	27	21	25	14	22	24	18	12	14	13	9	12	9	21		3	39	12	19	11	31	22	17	31	8	12	16	13	16
20140211	11		73	64	69	77	69	94	89	72		78	71	76	204	110	126	57	79	53	116	70	41	103	72	78	62	100	219		112	78	69	71	75	59
20140212	11	47	39	55		56	44	63	185	90	49	127	73	138	48	70	106	33	200	97		43	18	134	122	51	58	217	209	196	160		39	52	42	44
20140213	11	191	181	189	182	179	180	204	186	185	199	193	193	176	175		157	167	172	198	149	197	200	187	212	177	184	129	183	174	170	198	179	189	183	168
20140214	11	185	182	197	189	172	185	232	260	180	207	211	191	227	204		230	188	216	238	218	207	212	275	243	232	171	215	226		239	201	184	197	192	166
20140215	11	322	332	320	331	312	326	351	391	363	348	325	335	307	389	375	450	335	322	274	388	316	332	356	338	277	279	429	504	457	351	344	320	317	322	322
20140216	11	268	189	291	267	362	262	312	456	172	272	209	320	297	273	272	323	169	311	240	428	295	135	349	133	140	229	413	446	345	316	286	230	300	237	286
20140217	11	84	79	83	97	83	87	69	144	79	89	78	76	78	73	91	91	106	98	62	139	184	101	107	3	60	200	60	91		69	94	86	80	95	82
20140218	11	78	78	69	96	59	92	47	104	69	82	77	84	87	84	87	74	74	83	75	99	97	69	69	72		142	101	64		95	89	91	57	97	81
20140219	11	19	21	21	16	17	36	17	12	24	29	25	21	27	22	36	47	53	18	11	112	85	23	70	12	13	74	101	137		46	21	19	18	19	41
20140220	11	163	163	180	204	171	188	157	144		259	178	168	204	197	181	164	177	144	146	137	146	148	140	148	137	205	149	165		173	177	170	181	182	180
20140221	11			176	178	213	217	292	284	295	260	296	279	333	232	293	312	372	313	259	223	274	253	225	327	206	212		279	217	255		187	180	209	249
20140222	11	262	256	244	278	283	230	275	308	222	263	199	275	290	233	298	277	234	302	276	289	238	229	241	349	226	179		376	287	257	265	255	269	267	225
20140223	11	202	166	154	167	166	174	196	247	194	186	181	175	172	184	200	192	222	182	190	255	223	201	196	255	181	196		181	166	185	198	173	187	198	193
20140224	11		229		276		272	219	243	224	247		206	226	264	312	297	270	211	232	306	301	280	223	228	184	206	255	233	288	242	239		213		247
20140225	11	354	345		354	308	346	384	361	345	467	408	352	439	459	397	473	351	418	353	497	353	325	343	429	342		327	469	394	401	348	313	299	345	335
20140226	11	466	456	435	452	461	524	532	481	456	547	498	490	521	477	509	544	549	524	467	557	456	495	598		443	371	541	496	502	470	454	445	419	453	492
20140227	11	9	14	9	12	11	3	13	11	7	13	7	10		12	9	23	10	16	10	9	7	9	18	7	22	3	9	3	10	12	10	14	13	16	8
20140228	11	67	69	93	102	77	83	105	69	93	116	88	86	122	107	77		48	73	99		35	56	84	51	71	3	28	56	64	99	64	76	58	81	80
20140201	12	131	108	103	106	134	148	132	188	159	125	133	141	108	125	147	173	162	171	152	278	146	137	180	206	165	98	214	207	133	119	155	123	113	124	154
20140202	12	14	14	20	23	13	20	21	14	14	12	17	15	125	19	20	19	12	10	12	12	8	12	14	4	24	9	14	28	209	202	22	22	19	24	12
20140203	12	3	7	9	4	7	6	6	6	3	8	4	10	3	5	3	3	6	11	3	3	11	3	5	9	9	7	7	4		3	5	3	8	3	12
20140204	12	9	9	10	12	7	6	8	3	4	16	65	7	67	63	12	3	6	6	9	4	12	10	16	9	7	13	11	14	20	39	14	10	12	16	8
20140205	12	86	64	80	79	86	108	97	74	88	86	90	84	86	85	72	81	119	70	101	95	85	67	89	79	72	24	87	52		83	89	70	84	79	112
20140206	12	115	105	114	104	124	133	123	131	104	127	121	106	137	104	109	143	114	131	129	105	133	103	107		91	80	129	81		141	116	106	113	104	121
20140207	12	96	98	101	112	96	86	104	114	92	103	110	99	100	109	102	63	86	103	104	95	103	119	95	122	94	80	109	70		103	109	106	98	110	81
20140208	12	20	15	14	22	16	8	16	8		11	7	6	19	14	19	111	48	19	9	89	85	12	13	8	17	100	106	147		83	25	9	15	20	13
20140209	12	7	8	11	10	5	11	10	7	9	8	11	9	12	3	5	13	5	9	6	3	11	4	17	7	11	3	3	5	7	11	7	10	6	10	8
20140210	12	15	8	17	13	15	19	22	13	28	18	22	22	10		15	12	8	21	22	6		3	32	16	17	81	12	29			25	14	24	16	16
20140211	12
20140212	12	34	24	39	21	26	25	43	139	60	43	83	60	61	41	98	158	22	104	94		24	14	93	156	36	8	173	193	149	115	21	35	36	42	29
20140213	12	197	184	196	160	184	187	220	199	206	206	209	208	194	179		167	170	182	207	141	194	199	197	224	184	153	125	163	178	180	199	184	196	192	168
20140214	12	202	211	222	213	184	185	237	217	190	226	215	198	223	212	227	196	207	244	227	195	188	191	288	249	231	150	188	212	178	238	212	205	215	211	178
20140215	12	331	333	331	338	330	357	359	418	353	348	359	344	334	339	408	435	392	324	299	405	329	330	339	363	282	281	403	447	416	385	346	318	328	337	350
20140216	12	199	169	195	166	258	218	211	300	94	174	233	201	259	233	281	324	128	217	143	268	142	61	299	113	109	68	306	415	363	245	178	179	223	199	221
20140217	12	82	86	86	85	93	82	83	68	84	82	61	83	70	76	89	91	88	106	80	101	107	77	50	3	60		59	82		68		83	79	79	67
20140218	12	75	79	77	86	72	74	65	84	69	82	66	70	72	55	69	81	84	89	80	90	94	75		89	35	78	90	63	74	96	63	80	71	74	78
20140219	12	11	15	15	15	16	20	16	11	14	20	21	17	14	14	32	35	36	18	19	65	46	19	54	16	12	31	50	48		12	24	14	17	17	28
20140220	12	175	176	197	222	191	194	171	141	102	269	203	181	222	211		184	178	151	176		157	146	142	156	128	149		200	253	210	191	183	183	222	185
20140221	12	187	186	174	202	196	221	258	270	264	239	276	290	295	195	251	276	293	258	265	237	277	220	220	244	202			230		268		219	182	188	257
20140222	12	227	231	247	274	245	264	310	275	229	268	250	280	272	244	308	314	223	284	275	306	257	208	227	357	211		259	337	297	245	260	262	281	259	242
20140223	12	196	193	163	175	171	182	212	240	204	241	216	184	213	171	220	232	229	226	196	287	207	223	220	266	220	212	247	181	182	166	207	216	206	216	209
20140224	12		285	139	281	99		217	234	210	289	178	221		274	307	255	291	193	201	297	291	280	250	243	192	222			271	248	242	140	244	194	252
20140225	12	367	356	216	350	314	369	358	361	385	470	390	361	445	485	395	501	335	444	395	453	368		367	416	367		411	417	372	415	360	319	315	355
20140226	12	480	463	459	447	526	523	563	508	445	551	488	493	529	472	3	510	572	549	479	569	507	497	589		443	371	541	496	502	470	454	445	419	453	492
20140227	12	11	11	18	15	7	11	16	10	9		6	9	3	3	3	21	12	13	9	5	6	3	19	4	15	3		12	8	3	18	15	12	16	6
20140228	12	80	80	94	111	87	90	115	77	81	130	115	97	132	99	75		81	85	110	29	75	57	85	58	84		44	52	52	118	77	105	69	112	83
20140201	13	102	92	106	122	102	125	126	154	126	116	87	141	97	112	142	184	160	174	130	235	144	143	202	205	168	103	188	210	134	91	121	88	101	109	148
20140202	13	12	14	20	12	11	16	11	16	12	11	14	18	19	9	17	12		14	19	8	8	13	17	11	28	3	12	12		169	23	15	14	22	10
20140203	13	8	4	9	13	4	4	7	8	4	11	4	8	4	6	7	10	3	12	3	6	7	3	7	8	10	3	12	5	5	3	9	7	6	4
20140204	13	9	10	16	22	5	9	7	7	5	53	56	39	46	53	41	8	6	10	32	4	11	10	15	10	10	5	8	13	17	33	12	16	6	35	7
20140205	13	77	71	88	86	77	81	92	90	91	93	92	90	85	79	72	78	117	82	98	97	116	90	88	97	80	52	91	53		86	87	79	81	83	95
20140206	13	111	103	113	105	128	115	120	126	108	113	133	118	125	88	109	128	115	132	115	106	111	102	96		87	63	127	75		135	123	112	117	108	109
20140207	13	83	91	102	101	81	78	108	120	100	116	116	103	116	112	88	73	92	109	106	117	116	118	100	123	97	115	114	63	87	111	102	98	95	104	67
20140208	13	13	17	16	17	14	9	5	10	4	19	9	6	8	4	17	42	49	6	11	19	26	7	7	5	19	25	25	80	32	42	21	15	15	14	13
20140209	13	13	11	9	5	9	11	9	9	9	6	10	9	7	5	10	3	6	7	6	3	3	3	15	11	15	3	3	7	6	11	9	5	8	13	10
20140210	13	15	9	19	19	15	23	22	23	27	23	17	24	25	9	15	6	14	24	22	7	11	5	37	18	14	3	3	31			19	17	22	19	17
20140211	13	63	93	81	94	84		93	82	88	93	53	91		154	122	127	87	72	81	121	74	66	101	96	88	86	139	190		124	96	98	87	111	89
20140212	13	33	38	37	41	25	30	30	80	44	40	47	50	43	53	158	120	22	41	65		23	11	90	88	36	3	125	134		74	35	40	27	43	34
20140213	13	188	186	192	164	190	184	220	212	214	212	223	215	203	186	166		167	187	215	139	198	204	205	225	189	170	132	161	161	193	199	182	197	196	175
20140214	13	224	235	231	247	204	202	261	218	218	247	242	230	241	239	246	226	221	230	229	168	200	203	282	259	231	121		229	200	257	242	241	223	234	191
20140215	13	395	375	340	338	371	397	369	393	346	367	364	352	363	350	472	430	437	360	347	410	345	334	315	380	300	309	385	405		376	385	349	342	347	376
20140216	13	192	187	172	184	122	176	124	112	132	187	186	130	211	270	321	295	105	143	149	225	65	42	143	133	45	3	190	366	368	264	189	195	158	193	166
20140217	13	79	78	81	83	78	93	78	81	93	69	77	77	81	90	90	73	86		75	78	94	68	62	68	70	62	64	77	55	85		84	71	82
20140218	13	80	66	72	72	75	68	69	79	67	77	70	72	71	61	53	66	79	95	75	88	94	84		101	89	70	90	57	73	80	361	67	74	72	56
20140219	13	16	12	19	21	14	28	20	6	11	13	21	19	17	14	23	27	25	13	10	38	34	17	37	14	9	24	43	45	3	19	19	16	17	16	18
20140220	13	187	187	215	249	204	176	183	141		249	236	236	276	233		211	162	134	193		165	149	136	140	119	172	112	228	252	235	202	194		253	194
20140221	13	214	198	174	202	221	221	292	247	269	239	276	281	295	203	229	293	293	258	288	228	254	227	240	246	212	222		290		274		219	182	228	261
20140222	13	243	247	236	279	229	310	301	283	231	277	276	259	244	248	336	291	242	286	273	288	235	187	255	322	199			309		248	243	241	237	271	281
20140223	13	199	188	189	170	202	184	217	239	226	237	196	214	222	179	223	220	209	207	206	303	215	220	235	275	207	223		177	188	194	207	202	205	210	212
20140224	13	198		237	300	173	151	228	211	218	267	237	217	159	289	312	251	261	206	231	327	274	252	212	249	199	227	255	107	261	248	255	249	220	249	235
20140225	13	367	356	216	350	314	369	358	361	385	470	390	361	445	485	395	501	335	444	395	453	368		367	416	367		411	417	372	415	360	319	315	355
20140226	13	516	483	502	475	518	539	567	492	420	536	508	507	499	484	296	509	592	494	489	530	528	510	559	548	505		536	500	517	491	464	461	487	478
20140227	13	12	14	17	17	15	5	14	15	6	9	13	10	11	12	3	11	9	8	5		13	6	19	7	14	3		3	13	3	11	16	22	18	5
20140228	13	102	76	111	86	107	81	121	89	97	128	140	127	140	77	66		67	111	130	50	89	64	90	66	96	7	48	60	36	157	105	107	82	114	74
20140201	14	87	88	118	84	99	142	130	135	114	110	114	123	111	117	142	177	139	160	105	245	157	141	200	195	176	112	199	166		88	104	81	117	91	139
20140202	14	12	15	16	19	16	20	22	17	18	22	13	16	16	15	19	14	8	19	10	9	13	8	26	12	21	3	4	22		104	23	18	23	20	14
20140203	14	10	6	4	8	8	10	3	9	4	5	6	4	7	4	9	3	4	5	7	3	3	5	5	7	9	3	6	9	6	4	15	4	12	4	5
20140204	14	7	9	10	28	8	3	11	10	8	62	44	52	39	45	45	11	8	5	52	4	14	5	13	10	15	11	6	13		36	14	24	8	36	8
20140205	14	89	82	88	94	84	78	94	102	99	104	94	94	107	80	68	72	112	109	97	90	117	98	82	125	78	66	86	51		80	99	82	88	92	71
20140206	14	106	104	105	96	110	107	124	120	98	98	113	117	84	73	104	106	103	129	106	116	107	89	103		75	78	95	99	75	82	108	95	105	96	102
20140207	14	79	82	91	89	75	72	101	106	110	102	122	107	118	102	82	73	95	105	113	128	109	114	99	127	107		131	62	78	114	93	89	83	93	73
20140208	14	10	10	15	13	15	9	5	10	4	19	9	6	8	4	17	42	49	6	11	19	26	7	7	5	19	25	25	80	32	42	21	15	15	14	13
20140209	14	12	6	12	5	10	14	8	4	9	11	11	4	11	6	14	3	9	9	5	3	6	3	8	14	15	3	4	6		20	9	7	17	17	6
20140210	14	20		20	19	20	35	24	28	25	23	24	20	23	22	20	14		20	26	10	21	3	31	20	16	18	9	27		21	27	18	23	27	22
20140211	14	108	147	100	132	87	75	96	97	89	135	115	115	79	144	134	121	96	72		135	75	64	93	86	58	15	136			126	134	130	95	146	107
20140212	14	42	67	34	49	29	54	35	50	40	42	43	43	47	131	121	69	23	33	58	50	18	15	76	50	23	3		95		53	62	65	36	75	52
20140213	14	170	179	185	171	166	177	216	225	210	213	225	218	205	169	168		177	190	215	144	196	194	219	221	199	163	155	166		197	188	179	193	180	163
20140214	14	242	251	250	268	216	233	277	240	240	274	269	257	263	263	263	254	225	220	245	191	229	224	282	277	201	164		247		278	262	258	239	264	220
20140215	14	424	407	374	389	414	454	380	374	356	371	372	356	360	388	519	414	465	356	379	425	373	351	288	400	292	233	345	400		369	426	390	384	384	434
20140216	14	170	228	147	192	131	164	110	92	94	184	202	104	192	288	312	267	106	111	107	137	78	33	85	123	85	3	124	312		233	217	224	158	236	150
20140217	14	87	83	80	87	77	80	72	74	74	88	66	77	64	90	76	80	80		67	78	102		78	91	76	81	64	85		74		84	72	89	81
20140218	14	69	57	69	61	69	65	75	79	71	68	69	76	74	71	61	63		89	72	74	94	82	60	102	99	79	69	59	60	75	67	63	66	66	62
20140219	14	18	20	13	19	19	24	21	7	7	20	18	20	10	17	26	18	22	10	17	25	21	16	29	9	10	25	33	45		17	21	20	13	14	20
20140220	14	206	217	248	280	186	176	228	187	211	313	260	238	285	310	174	217	175	175	239	138	171	156	147	159	118	166	197	239		267	230	223	142	282
20140221	14	244	224	213	259	238	251	291	253	263	221	280	259	258	210	230	303	267	224	275	248	253	204	252	255	209			251			198	217	234		274
20140222	14	307	293	240	306	242	286	261	295	228	277	254	231	285	312	304	288	242	259	241	288		185	240	334	208	172		293		254	276	264	236	258	268
20140223	14	170	169	192	197	171	185	211	230	231	226	208	189	195	194	210	204	223	219	212	309	241	223	227	251	218	235		180	186	202	216	208	205	207	213
20140224	14	252		267		187	253	210	217	211	315	267	200	272	293	330		268	236	205	291	264	219	214	240	188	245		211	249	245	271	321	217	314	210
20140225	14
20140226	14	513	512	501	501	498	533	539		420	536	508	507	499	484
20140227	14	20	15	15	18	20	20	15	15	5	21	10	12	12	13	3	7	9	8	10		5	3	20	3	18	3	4	13	11	10	23	12	22	17	5
20140228	14	80	84	127	124	90	97	128	104	110	147	124	118	137	97	58		51	141	139	53		64	91	96	68	37	50	70	73	155	88	115	122	116	86
20140201	15	110	108	86	93	103	123	119	122	133	101	132	119	106	123	122	131	150	140	102	232	175	160	186	177	174		224	131	114	103	132	99	82	111	131
20140202	15	19	19	18	14	21	17	19	17	18	20	11	13	14	23	17	9	4	12	11	8	6	3	14	8	17	7	5	12	22	3	28	22	20	22	13
20140203	15	8	6	4	7	9	12	8	6	5	9	5	6	7	6	11	13	5	4	11	4	3	3	9	5	3	3	7	4	6	3	8	10	6	5	6
20140204	15	10	11	9	25	3	5	5	8	9	49	43	46	35	41	39	13	10	6	55	3	13	8	14	10	10	29	10	9	27	36	13	18	7	33	6
20140205	15	93	86	106	98	94	85	104	103	98	112	102	100	91	79	80	62	123	100	103	91	105	88	78	118	91	51	88	46	66	64	98	89	102	95	80
20140206	15	95	92	102	100	113	110	120	96	92	85	94	96	84	83	95	85	91	100	96	98	99	93	99		85	72	94	102	75	77	108	92	104	88	96
20140207	15	84	75	86	89	77	73	97	87	102	104	120	104	118	87	77	76	92	93	118	130	110	113	104	122	111	110	133	69	73	109	87	82	87	90	74
20140208	15	19	14	10	10	13	4
20140209	15	8	5	11	10	3	10	7	8	9	15	11	8	7	13	8	9	7	14	8	4	3	8	16	12	10	3	7	3		21	7	11	7		11
20140210	15	23			20	24	25	29	27	18	27	26	29	27	24	23	5		19	26	10	23	11	27	27	10		7	29		41	29	23	24	25	17
20140211	15	144		141	133	125	122	131	93	118	128	125		127	125	142	128	106	73		143	77	67	84	90	43	49	145	48		135	155		130	137	118
20140212	15	103	118	64	115	45	106	42	37	39	83	48	43	58	154	92	64	34	35	51	64	19	8	24	48	24	22		89	155	44	111	110	42	117	93
20140213	15	178	181	181	176	167	173	189	230	211	188	203	200	199	176	169		181	185	218	163	200	190	214	223	204	177	162	177	178	196	194	179	180	184	174
20140214	15	258	254	264	276		246	287	239	251	286	288	266	289	283	266	286	248	228	268	226	241	228	271	272	181	167		271		302		265	243	280	240
20140215	15	496	492	395	427	455	491	397	374	368	383	375	366	360	436	506	377	412	357	377	365	407	396	284	403	320	322	363	387		364	523	473	403	464	442
20140216	15	205	232	186	240	130	231	141	80	103	237	191	181	253	224	278	230	103	106	110	118	72	41	62	118	63	64	81	316	270	269	251	247	168	236	191
20140217	15	79	66	79	82	80	76	89	74	77	87	68	73	3	72	79	84	87	45	71	74		56	97	91	70	80	79	76		58		77	74	81	72
20140218	15	70	73	75	71	71	70	82	78	76	73	80	66			73	64	45	89	82	57	99	83	102	98	95	94	57	73		57		74	72	75	63
20140219	15	16	13	17	19	16	8	15	11	12		17	18	16	19	24	24	18	14	16	19	22	16	18	14	6	54	21	44		29	15	18	17	25	15
20140220	15	245	252	283	322	256	280	217	205	238	306	270	264	284	344	326	255	192	195	270	205	179	175	145	176	130	174	197	250	280	307	266	261	222	320	153
20140221	15	243	262	222	254	243	247	263	281	253	228	250	260	220	205	228	273	250	245	261	230	240	199	245	245	202	312		222	210		237	253	237	218	262
20140222	15	267	266	299	293	300	261	263	288	243	338	255	244	258	331	284	286	300	250	263	287		190	212	349	194	204		277		256	290	268	251	301	270
20140223	15	187	209	162	209	187	202	185	210	220	232	227	198	220	203	197	225	229	229	230	301	221	233	204	260	221	243	296	192	186	203	230	225	184	225	234
20140224	15	302	134	305	203	241	325	241	233	213		273	238	302	323	321	216	279	267	249	262	260	221	219	284	222	184	271	280	259	274	321	355	315	339	263
20140225	15
20140226	15	485	493	512	512	475	489	3	479	432	535	488	3	493	518	497	521	588	293	3	390	435	535	473	471	345	413	327	472	510	474	498	498	478	487	435
20140227	15	14	11	12	16	12	19	12	15	11	13	10	11	6	8	3	4	15	18	4	3	8	6	15	16	23	3		9	4	3	24	14	15	14	8
20140228	15	112	103	106	109	95	78	127	141	132	129	146	142	136	76	58			151	145	48		66	69	129	76	57	46	53	64	140	104	97	132	101	84
20140201	16	117	98	110	110	102	121	98	127	109	112	98	103	90	114	121	125	139	118	124	172	150	156	187	147	172	127	216	93		111	125	106	100	112	119
20140202	16	11	9	11	13	13	19	15	18	23	17	12	14	15	20	17	13	8	9	9	8	7	3	8	4	17		5	15	22	179	25	16	17	23	13
20140203	16	6	7	8	3	10	8	8	5	8	6	9	3	8	6	6	3	5	9	8	6	5	4	6	3	5	3	6	13		3	10	8	4	8	4
20140204	16	7	21	19	38	12	12	13	6	13	44	42	41	42	37	45	10	12	9	45	6	12	8	15	7	13	21	8	13	30	39	29	33	12	40	7
20140205	16	92	84	96	88	94	88	108	96	103	104	88	103	80	79	88	65	96	104	115	94	115	108	102	119	103	59	82	53	57	76	100	88	96	88	78
20140206	16	100	86	92	86	99	106	115	100	87	85	83	84	83	85	83	83	90	84	92	99	86	90	93		90	76	98	108	83	79	100	86	100	89	99
20140207	16	84	78	86	82	79	85	92	89	95	93	120	105	114	81	78	84	98	88	114	139	100	113	113	100	108	124	140	72	67	110	88	77	83	79	80
20140208	16	19	14	10	10	13	4	12	12	12	17	9	14	13	4	5	18	21	6	11	13	13	8	5	3	5	3	9	32		6	15	13	15	21	3
20140209	16	5	6	10	11	9	12	6	8	7	9	8	5	7	5	9	6	6	13	8	4	9	3	16	11	13	3	3	8	7	18	10	5	13	17	10
20140210	16	23			28	28	25	30	24	28	25	37	33	30	21	27	10	12	23	34	11	25	3	23	27	14	3	15	33		33	28	26	22		18
20140211	16	126		118	120	124	117	121	118	119	127	123		142	131	151	130	120	88		138	88	88	62	89	62	62	127	117	141	164	128		123	124	121
20140212	16	101	100	114	113	97	91	79	42	48	135	93	71	132	152	112	49	47	35	49		26	19	20	43	14	3		106		46	110	99	100	107	80
20140213	16	183	179	188	196	173	174	189	241	189	203	197	192	201	179	164			192	214	163	196	183	208	221	204	191	158	188	194	204	197	183	188	190	169
20140214	16	282	292	267	291		277	292	249	250	296	298	275	299	273	268	284	268	228	278	229	253	230	256	262	228	196		290	269	305		284	258	298	253
20140215	16	485	501	438	517	505	441	420	381	375	485	378	374	365	516	465	392	400	376	384	371	424	396	270	421	367	316	375	374		364	532	494	447	514	384
20140216	16	226		220		219	239	233	120	174	199	193	208	234	226	235	239	148	93	197	89	72	57	63	118	73	74	136	268		286	235	196	218	197	211
20140217	16	76	85	77	79	73	81	82	77	71	78	69	78		52	72	90	84	73	70	85	61	87	78	83	72	87	75	73		55	62	80	73	81	72
20140218	16	82	76	75	82	77	83	82	79	80	77	88	82		35	71	65	74	92	90	66	98	81	99	96	92	19	71	69		63		82	74	74	72
20140219	16	15	16	18	25	13	19	14	9	16		20	22	21	26	27	23	20	13	18	9	26	21	14	12	16	18	26	49		31	21	18	15	30	12
20140220	16	276	321	314	340	283	305	261	224	242	337	282	279	336	352	341	283	207	185	285	205	200	189	176	198	159	182	197	221	241	342	325	298	274	353	273
20140221	16	279	229	234	276	251	242	265	283	259		230	252	238	220	232	264	245	260	255	211	231	200	235	284	196	254		229	215	144	265	239	241	243	258
20140222	16	263	276	297	310	299	264	274	272	254	333	264	259	298	287	302	273	295	250	266	275	154	195	245	351	211	160		273	368	262	302	306	293	301	270
20140223	16	211	190	187	224	209	260	192	215	216	215	194	209	206	200	175	240	251	240	207	302	238	267	252	265	225	235	296	194	182	215	211	205	210	237	249
20140224	16	356	350	334	306	262	342	328	237	207		259	263	304		309	341	268	277	279	241	242	197	227	295	211		268	262	225	287	327	369	368	379	274
20140225	16
20140226	16	483	463	497	499	456	496	3	479	446	563	486	3	459	477	469	523	580	371	274	462	460	534	464	350	255	384	386	532				498	478	487	435
20140227	16	18	7	17	15	17	6	15	14	11	17	15	14	12	8	8	9	11	18	11	6	18	3	21	16	27	3	3	13	14	10	15	15	17	15	11
20140228	16	94	88	101	82	101	71	97	144	114	105	108	110	107	48	52			143	138	52	79	57	63	135	91	74	54	51	58	131	94	81	98	85	74
20140201	17	116	104	104	116	98	108	112	111	106	108	93	99	93	116	130	120	107	127	123	165	165	177	189	146	146	143	145	80		91	125	113	107	124	95
20140202	17	10	10	13	15	13	15	13	11	12	16	9	11	11	27	12	5	7	8	11	10	9	3	8	7	9	3	8	7	19	205	14	14	6	16	13
20140203	17	4	7	3	7	4	7	6	6	7	10	5	5	11	6	3	3	5	6	6	6	4	4	7	6	5	3	9	10		5	9	8	10	7	4
20140204	17	30	35	46	46	14	12	41	11	36	46	46	45	44	37	47	8	12	11	50	8	15	5	17	11	11	3	15	35		33	43	38	37	44	9
20140205	17	91	83	91	87	87	89	98	105	98	88	83	87	84	81	85	69	86	93	99	82	118	110	111	119	105	103	77	66		80	97	89	91	87	82
20140206	17	91	88	89	95	90	89	95	93	89	88	84	80	74	80	86	99	101	85	88	100	90	88	97		82		99	107	86	75	99	89	90	88	92
20140207	17	88	79	83	85	84	87	92	92	94	87	96	88	97	82	83	88	100	90	110	135	117	116	119	114	92		138	76		99	100	84	80	85	80
20140208	17	6	15	8	12	3	13
20140209	17	8	4	4	10	5	9	9	5	10	9	14	9	17	13	8	6	6	12	4	3	6	3	12	14	14	8	3	10	7	30	11	10	14	11	8
20140210	17	24	10	18	27	25	24	37	29	35	27	36	37	35	28	33	19	24	27	41	15	28	19	23	25	24	23	20	32	38	37	30	28	28		25
20140211	17	119	70	125	135	111	114	128	114	110	144	136	79	156	194	199	123	135	110		130	89	90	55	98	69	98	129	108	126	189	135	87	121	146	109
20140212	17	95	103	118	119	94	90	135	51	91	162	138	129	142	173	149	65	63	41	59	36	26	19	22	41	28	38	11	136	125	44	133	119	105	126	86
20140213	17	180	182	194	191	188	171	218	228	185	211	209	200	216	202	179	129	183	199	222	160	192	185	212	221	202	131	154	206		218	189	180	200	198	166
20140214	17	303	293	287	303	114	293	295	269	273	312	309	290	302	282	275	278	260	238	294	270	259	256	272	285	244	250		332	316	302		284	278	290	273
20140215	17	439	459	480	511	466	397	467	401	385	550	386	375	389	533	400	401	413	387	395	371	403	401	252	434	370	341	351	358		366	490	471	467	500	341
20140216	17	202		185		210	204	202	191	191	209	227	190	283	274	275	285	198	115	210	212	111	107	72	100	85	31	213	187		301	233	213	186	233	191
20140217	17	75	69	79	64	77	71	75	71	68	67	63	66		59	71	99	83	80	62	87	79	77	78	87	69	80	92	74		64	82	72	68	72	72
20140218	17	79	75	76	71	77	75	80	89	89	78		81	47	64	67	52	82	83	83	68	100	86	100	98	83	91	70	72		65	53	75	75	75	70
20140219	17	18	29	14	27	18	23	18	13	15		19		27	23	25	14	22	17	21	20	23	16	14	13	15	80	33	87	30	27	28	29	19	33	15
20140220	17	286	342	276	358	304	336	287	233	282	381	298	283	377	350	329	290	226	205	288	207	231	199	198	214	176	217	198	216	218	357	318	323	306	368	297
20140221	17	247	240	241	281	246	242	271	266	267	254	245	226	274	227	241	242	249	259	246	184	243	206	216	311	220	194		234	208	244	233	253	243	277	245
20140222	17	260	284	263	293	269	261	305	265	259	303	272	264	274	275	286	277	278	264	283	268	225	199	240	332	224	179		248	338	270	295	287	269	299	259
20140223	17	232	210	213	248	216	283	220	222	228	229	206	186	207	201	192	239	261	247	223	303	244	274	221	274	226	235	296	202	180	222	233	219	231	266	262
20140224	17	361	386	379	405	323	382	364		268	239	301	303	325		280	347	296	255	305	281	269	222	237	314	234	222	253	269	232	287	359	387	393	385	310
20140225	17
20140226	17	445	452	453	453	427	464	328	457	403	530	500	294	481	486	447	536	550	236	456	556	486	519	355	249	135	364		532	504	444	461	439	435	441
20140227	17	23	9	14	11	18	9	12	17	15	10	15	14	13	16	14	9	8	22	15	5	11	7	16	20	21	3	9	16	15	20	22		16	20	14
20140228	17	81	67	73	65	70	66	102	130	122	93	104	90	116	63	68	46	47	145	117	70	110	82	67	140	98		71	50	51	123	61	76	90	71	61
20140201	18	115	99	106	117	101	105	110	115	100	116	104	104	98	124	103	112	120	114	110	168	145	170	164	145	123	158	151	93		101	126	124	109	134	92
20140202	18	10	4	14	3	3	10	9	10	12	9	12	10	8	11	14	5	7	8	10	7	12	3	3	3	10	3	3	10	18	203	12	11	14	10	6
20140203	18	4	8	7	3	5	7	8	8	4	11	4	11	5	7	6	3	6	7	6	11	4	7	4	7	5	5	5	13		6	15	9	8	7	4
20140204	18	44	39	45	41	29	23	48	41	44	52	49	57	44	45	38	16	17	17	53	19	16	19	18	22	13	3	12	36		38	51	42	45	47	18
20140205	18	88	80	81	87	83	85	89	99	83	96	90	91	91	70	78	73	85	105	93	77	110	107	114	121	103	120	77	67		84	95	85	84	92	78
20140206	18	95	87	92	90	87	93	92	88	87	97	87	83	79	82	101	111	123	89	90	114	99	93	98		90	67	117	119	96	74	106	94	89	95	88
20140207	18	90	85	86	88	84	86	90	98	98	89	95	85	88	84	92	92	102	97	101	135	115	122	108	125	90	98	125	73	71	102	109	88	87	87	85
20140208	18	3	9	14	8	3	8	9	3	8	12	10	6	10	12	3	9	7	8	3	8	12	3	3	4	4	3	10	6		6	12	8	11	11	6
20140209	18	10	10	11	6	9	16	7	6	8	12	18	8	26	10	12	13	11	15	4	5	15	3	10	9	10	3	8	9	9	36	10	12	16	11	9
20140210	18	27	20	31	30	23	36	36		41	37	44	45	32	33	33	29	23	33	45	18	28	27	31	35	25	61	18	29	42	43	33	30	33	27	26
20140211	18	177	190	142	192	123	164	145	110	119	195	201	146	195	183	195	168	132	122		142	101	105	55	106	79	3	130	90		140	205	190	138	203	152
20140212	18	140	167	151	170	114	132	170	95	143	169	140	144	141	174	208	91	76	74	73	53	40	31	28	73	40	26	41	128	155	72	165	166	137	183	113
20140213	18	201	187	218	200	205	177	255	218	190	214	219	211	224	211	200	193	188	205	242	160	205	192	212	215	206	180	159	212		225	208	195	229	205	168
20140214	18	294	270	293	296	295	277	301	274	282	316	320	317	306	287	282	294	279	252	311	296	265	300	266	303	251	221		334		303		281	297	296	282
20140215	18	423	405	467	480	401	387	509	424	379	554	491	498	521	419	418	421	407	412	411	362	393	418	339	451	371	325	346	338	402	416	449	425	446	469	346
20140216	18	270		234		218	262	212	205	191	294	282	243	309	262	270	243	260	203	226	252	185	115	92	232	112	50	238	180	209	282	306	291	212	304	255
20140217	18	68	69	66	72	70	72	65	72	58	69	60	63	47	64	71	92	96	75	57	105	87	85	79	91	74	72	99	80		76	80	75	60	72	68
20140218	18	71	70	74	75	74	72	78	90	76	79	39	77	87	71	71	66	86	87	78	73	104	107	94	102	84	57	73	77		76	75	72	72	72	67
20140219	18	24	24	24	31	24	22	22	25	21	18	29		33	24	24	40	24	20		31	28	20	18	13	18	8	64	115	68	32	30	30	21	32	26
20140220	18	307	347	329	372	333	344	294	251	267	417	322	285	378	324	317	293	305	195	292	214	218	218	222	226	188	207	214	258		356	373	334	323	377	310
20140221	18	246	249	246	275	236	235	277	272	268	273	253	241	276	232	255	272	247	279	263	235	226	203	234	332	249	247		215	207	247	251	258	248	278	251
20140222	18	267	252	246	241	261	236	297	251	242	290	264	249	276	257	239	275	269	263	260	222	221	190	238	355	218		218	244	294	303	264	259	266	269	237
20140223	18	221	208	200	257	205	263	215	203	213	232	199	198	171	167	203	233	223	214	214	291	236	258	208	287	210	192	269	191	159	187	228	216	213	240	245
20140224	18	368	355	391	377	358	389	391	161	299	397	343	368	338	138	288	336	296	263	326	303	249	249	259	322	248	163		254	235	268		352	413	347	339
20140225	18
20140226	18	241	285	291	274	187	253	339	283	290	383	502	424	449	369	312	440	553	130	291	564	468	542	347	135	45	363	511	514	457	418	291	270	243	254	202
20140227	18	17	16	18	18	17	18	12	17	13	13	18	17	15	18	18	7	3	26	15	8	11	6	23	20	16	3		11	18	18	16		20	21	14
20140228	18	72	73	107	103	93	94	145	131	147	112	136	124	129	71	67	76	80	158	127	76	120	105	94	139	109	93	74	48	62	104	77	77	92	115	83
20140201	19	123	121	118	131	107	128	115	107	108	115	107	114	110	105	73	91	124	117	114	173	124	135	138	140	126	176	111	93	89	99	141	118	115	123	109
20140202	19	15	4	11	8	12	12	12	11	9	16	11	12	9	11	11	16	7	8	10	10	11	7	8	6	10	3	14	16		24	18	9	9	10	7
20140203	19	5	4	8	6	3	8	3	8	8	8	5	5	5	6	6	12	8	5	8	14	4	5	3	3	8	3	10	12		8	12	4	7	7	3
20140204	19	66	45	59	59	46	51	53	52	56	83	80	86	81	120	61	50	32	24	86	33	35	37	31	21	9	16	24	34	40	59	62	51	69	62	44
20140205	19	82	80	83	87	86	79	94	92	84	92	101	104	105	74	73	89	95	117	99	113	121	103	116	123	107	93	75	75	82	104	93	80	87	86	79
20140206	19	99	96	88	95	92	100	98	90	89	95	101	89	95	102	116	126	125	100	95	132	107	103	96		94	70	141	153	109	73	114	98	91	100	107
20140207	19	95	92	89	86	89	86	92	105	100	92	103	88	92	76	97	93	106	103	93	133	119	110	104	123	89	103	122	77		110	114	87	94	91	82
20140208	19	3	6	12	10	6	4	9	7	4	10	11	9	8	5	9	15	5	8	8	10	9	3	5	3	9	15	8	13		10	8	12	11	14	3
20140209	19	11	11	10	9	15	8	8	11	8	32	32	12	32	30	18	13	25	22	7	12	27	3	17	11	15	3	11	30	15	32	17	12	15	22	8
20140210	19	41	28	39	40	31	31	45		46	43	54	64	44	39	41	32	34	44	53	33	41	33	36	46	31	48	39	35		54	57	35	44	42	28
20140211	19	210	196	194	219	169	185	191	119	130	221	217	206	176	184	193	151	150	114		166	140	134	73	137	95	102	134	102		149	226	193	184	204	174
20140212	19	188	188	166	182	160	185	164	127	150	164	148	156	133	157	228	172	93	129	75	107	94	42	49	94	51		132	133	175	133	203	186	168	190	160
20140213	19	226	223	235	221	220	205	251	217	224	223	252	226	232	219	198	203	203	221	245	164	203	192	211	214	198	148	169	225	221	227	251	221	243	216	191
20140214	19	301	269	302	320	298	283	322	270	279	352	318	372	340	324	299	320	287	268	344	333	353	341	258	310	256	237		370	329	307		306	335	337	295
20140215	19	416	385	460	453	403	382	527	399	382	524	556	555	561	416	477	419	395	435	494	371	407	456	356	444	389	311	354	345		423	435	425	414	446	358
20140216	19	292		305		296	281	313	207	234	303	319	304	283	243	255	251	292	186	264	301	241	208	136	285	185	88	193	191	196	300	303	274	294	279	252
20140217	19	71	77	75	84	73	74	74	66	67	78	71	77	90	75	77	98	95	82	70	124	102	98	88	106	72	91	92	85	70	82	85	80	74	83	68
20140218	19	79	77	81	87	76	74	87	75	70	104	87	92	100	86	84	70	82	102	84	92	103	106	100	108	89	154	71	96	65	82	87	76	84	85	64
20140219	19	30	28	26	28	32	29	28	41	28	40	36	36	52	33	65	124	32	35		107	52	24	20	19	22	22	125	155		43	29	39	30	41	26
20140220	19	330	343	360	379	343	352	320	278	255	435	362	304	423	320	299	308	290	233	302	231	249	201	207	239	194	192	210	246	209	354	385	343	342	372	313
20140221	19	246	252	239	276	232	239	269	263	264	276	252	257	247	238	249	242	251	253	279	217	254	230	244	337	261	208		220		242	252	259	240	284	268
20140222	19	242	237	224	220	212	214	249	233	245	304	321	240	283	246	243	257	250	242	261	265	215	183	252	342	212	160	220	259	302	301	252	254	238	265	244
20140223	19	228	213	203	261	237	259	210	198	227	247	208	210	213	172	207	251	232	214	232	298	235	258	194	308	194	204		190	162	177	230	227	208	248	248
20140224	19	329	300	352	317	371	344	378	274	330	386	338	343	346	283	273	325	311	275	344	342	260	280	267	326	278	232	310
20140225	19
20140226	19	101	112	120	130	107	99	168	99	142	240	377	196	336	241	103	158	391	99	41	498	451	438	233	52	30		509	279	332	350	115	116	101	134	83
20140227	19	17	16	18	18	17	18	12	17	13	13	18	17	15	18	18	7	3	26	15	8	11	6	23	20	16	3		11	18	18	16		20	21	14
20140228	19	89	87	120	110	149	101	157	144	136	141	138	131	125	64	70	78	81	157	153	88	128	124	109		112	100	86	58	45	101	94	107	82	116	92
20140201	20	113	89	116	111	113	112	124	111	117	124	120	147	133	102	87	102	128	135	117	157	133	138	132	142	111	150	94	91	93	113	122	110	157	124	95
20140202	20	9	9	6	12	8	6	8	9	14	11	7	15	14	13	10	15	5	6	10	8	10	5	9	4	9	3	19	24		13	9	9	10	13	12
20140203	20	5	8	4	4	4	10	5	10	9	15	7	4	4	5	7	11	7	10	7	11	3	3	8	4	11	3	14	16	9	7	11	8	11	5	5
20140204	20	88	62	89	117	59	59	76	70	61	102	129	158	118	93	103	77	49	47	114	105	80	155	64	44	13	7	15	56	52	89	88	77	110	81	53
20140205	20	77	71	80	75	79	72	87	100	93	97	117	108	122	85	77	98	115	131	108	159	144	110	120	123	110	95	77	79	78	152	84	80	78	98	66
20140206	20	119	116	105	116	100	114	98	92	84	112	126	98	112	125	126	144	138	103	101	147	129	120	96		95	90	136	77	140	90	130	122	103	113	115
20140207	20	93	90	95	90	91	88	109	120	101	98	112	99	89	86	98	92	121	117	104	131	136	114	106	118	92	113	124	85	68	74	115	94	94	90	88
20140208	20	10	4	12	7	5	3	4	8	11	8	9	7	5	3	8	17	7	9	6	6	11	4	5	4	5	10	4	17		6	8	11	10	14	7
20140209	20	15	9	11	20	12	11	8	12	6	43	42	10	41	48	40	26	29	23	12	38	33	3	14	13	15	3	6	70		66	17	14	16	42	9
20140210	20	42	34	41	46	37	35	50	30	52	50	62	75	53	48	51	49	45	56	63	50	49	33	36	51	35	33	45	43		79	46	37	45	47	33
20140211	20	190	190	174	196	170	185	200	122	151	210	193	225	172	175	196	162	187	134		182	150	146	109	135	111	83	135	105	106	175	196	174	177	186	175
20140212	20	179	182	146	172	167	183	145	134	138	170	121	151	97	148	218	208	149	147	83	176	107	63	60	106	56	50	159	167		154	170	159	150	157	176
20140213	20	232	235	250	242	234	207	248	228	212	242	257	227	232	224	208	245	218	230	261	180	209	206	208	209	198	131	162	257	226	243	252	245	249	222	197
20140214	20	366	287	356	373	293	310	367	275	279	474	381	490	575	424	360	549	378	352	457	425	358	458	281	319	258	248	301	485	390	316	420	365	434	428	380
20140215	20	449	388	435	457	412	401	523	388	464	543	586	563	555	427	485	503	462	450	490	409	456	469	388	459	399	345	345	468	390	488	468	441	419	467	361
20140216	20	272		281		287	263	303	255	307	291	299	335	279	212	221	245	275	225	320	236	301	280	205	258	205	186	181	212	187	280	292	274	287	265	241
20140217	20	81	82	81	92	76	80	85	69	76	91	80	87	88	64	72	82	111	80	87	85	119	104	87	92	68	106	61	38	49	71	92	83	85	93	76
20140218	20	89	95	94	95	88	80	96	78	88	109	108	108	119	89	87	119	101	112	103	112	120	106	100	105	93	82	78	97		107	91	89	88	94	71
20140219	20	61	63	33	72	40	73	28	50	20	71	51	67	64	85	115	148	112	50	27	154	68	43	60	28	20	3	171	142	107	69	78	88	30	86	60
20140220	20	335	338	364	389	342	333	359	313	268	440	399	340	411	314	301	333	300	256	291	254	282	213	209	246	199	201	222	263		346	374	355	345	369	302
20140221	20	255	279	243	285	241	248	264	260	259	291	262	277	295	252	240	281	260	255	282	281	264	291	254	353	259	174	237	271		246	297	277	248	285	263
20140222	20	214	211	214	251	208	227	252	234	245	300	293	245	303	244	246	293	236	240	267	271	219	187	250	334	228	142		222		283	256	255	248	270	280
20140223	20	236	229	215	237	215	267	216	197	224	283		217	193	181	210		240	215	234	301	235	260	214	342	201	204	277	191	169	180	246	233	218	234	248
20140224	20	310	289	312	305	325	321	367	280	330	374	361	344	366	306	258	340	325	340	362	376	290	326	284	335	283	272	350	282	284	300	317	304	332	318	284
20140225	20
20140226	20	85	81	83	85	85	84	81	79	74	103	228	145	255	118	72	90	164	63	40	276	460	304	54	47	22		366	92	211	191	90	86	88	107	64
20140227	20
20140228	20	106	87	102	81	162	99	160	142	128	124	145	157	124	59	96	97	122	163	166	112	135	139	132	3	111		99	57	53	136	89	88	135	93	112
20140201	21	120	106	148	124	112	112	128	122	115	136	133	132	119	104	93	105	115	125	140	122	128	165	174	145	109	127	82	95	89	114	134	116	118	127	94
20140202	21	15	9	9	6	8	13	6	5	10	10	7	13	10	7	13	18	3	11	6	4	6	6	19	7	3		10	18		11	13	10	8	13	14
20140203	21	10	4	6	4	10	12	11	9	6	10	11	3	8	6	10	11	6	8	4	13	6	9	7	10	9	3	12	16		8	9	10	17	6	3
20140204	21	113	84	111	135	87	87	114	103	73	120	114	158	105	87	135	77	62	91	119	171	143	124	57	42	14	24	15	63		108	103	102	118	123	69
20140205	21	86	75	97	103	78	77	104	109	95	112	126	108	125	100	83	167	129	115	123	160	149	136	134	125	104	105	81	130	87	137	110	105	93	102	68
20140206	21	127	127	122	122	112	132	119	109	88	128	130	107	132	161	110	89	150	107	100	129	149	139	102		104	100	88	74	112	99	146	135	135	130	131
20140207	21	91	87	91	88	92	88	130	127	117	105	95	107	92	86	100	94	121	111	107	139	135	105	107	125	97	132	130	99		74	113	92	94	85	86
20140208	21	7	3	7	9	6	3	8	7	7	11	8	8	3	3	8	12	6	8	8	10	9	4	4	3	7	3	4	8	7	7	7	6	12	15	6
20140209	21	11	15	11	11	8	15	11	12	6	46	48	13	44	57	49	18	40	21	8	27	16	3	16	12	15	3	10	50		98	12	14	15	34	13
20140210	21	48	38	50	54	42	44	58	51	55	61	78	76	59	60	69	53	58	59	74	85	66	38	41	74	39	37	46	59	61	122	57	52	53	58	37
20140211	21	185	170	160	194	146	170	181	138	172	213	202	216	172	181	186	185	230	134		216	128	166	118	137	120	95	132	132	113	187	190	179	163	180	162
20140212	21	150	157	114	160	151	154	122	134	112	154	123	142	110	169	209	236	204	155	106	198	132	126	95	164	65	17	202	229	182	170	157	140	132	148	141
20140213	21	250	234	249	246	237	208	250	236	218	245	275	233	237	242	255	242	219	203	265	183	215	213	223	208	201	176	140	249	233	277	249	246	247	230	201
20140214	21	504	374	456	457	343	372	425	338	291	612	372	527	604	522	427	861	497	330	460	434	354	470	258	366	254	198	307	842	471	453	498	459	498	566	476
20140215	21	451	405	451	462	414	401	531	410	451	543	569	564	568	449	487	502	409	409	462	406	443	473	419	447	397	344	330	517		441	482	448	439	439	365
20140216	21	268		273		268	254	286	300	293	321	321	303	266	205	207	227	285	275	323	197	314	252	220	250	191	260	175	213	185	300	285	257	275	278	236
20140217	21	69	70	65	66	65	66	70	75	72	55	63	66	64	39	33	55	85	95	80	51	134	100	81	99	71	99	41	33	29	50	76	66	66	69	66
20140218	21	91	92	88	97	85	93	102	113	91	106	120	106	124	101	80	91	137	104	123	120	122	99	103	107	92	103	66	89		134	94	90	86	98	76
20140219	21	122	118	89	125	102	113	73	45	22	118	75	79	105	117	123	161	159	61	61	175	127	124	51	25	21	76	168	144	124	104	102	127	75	106	103
20140220	21	322	304	354	375	334	349	363	314	287	406	410	325	399	322	285	352	319	248	288		268	232	215	257	202	204	204	291		356	359	346	342	342	323
20140221	21	277	268	251	279	247	243	273	303	245	309	274	297	269	257	240	335	268	295	296	305	285	284	258	336	258	163	237	347		259	284	250	255	263	256
20140222	21	238	227	238	215	212	254	266	238	254	292	282	264	274	240	222	262	238	241	272	271	258	193	238	320	226	208	253	225	205	277	253	255	244	235	266
20140223	21	236	214	214	239	247	263	228	198	232	283		226	201	193	219	254	251	207	220	318	242	265	219	313	226	226		184	174	183	240	227	217	218	253
20140224	21	316	270	298	301	304	313	318	293	300	391	371	328	353	292	269	305
20140225	21	479	422
20140226	21	67	65	63	62	55	56	57	22	49	70	114	77	123	84	67	66	260	40	10		384	137	63	32	19	36	174	79	100	160	72	70	53	80	51
20140227	21	27	18	29	35	8	30	28	25	33	61	30	41	47	33	34	119	27	35	35	62	46	11	35	37	21	67	13	62	38	46	27	39	27	33	32
20140228	21	90	68	82	112	156	127	166	150	129	126	151	156	117	86	102	106	140	158	165	127	132	156	162	111	122		88	104	57	142	70	84	151	88	132
20140201	22	121	105	127	124	121	118	141	128	135	139	130	132	114	104	91	102	96	118	141	110	136	144	151	142	115	135	87	112		123	139	118	129	133	103
20140202	22	11	12	6	7	3	12	9	10	11	11	13	14	5	16	14	12	12	13	7	7	9	13	11	3	5	3	15	12		13	15	5	9	9	12
20140203	22	17	7	6	7	8	7	9	6	7	8	9	5	4	5	10	10	4	6	5	9	5	10	7	3	3	3	10	18	8	10	13	10	14	8	9
20140204	22	99	108	110	128	158	92	108	105	66	122	128	155	109	71	94	91	86	57	109	147	42	98	80	35	24	19	10	81		131	173	135	181	175	74
20140205	22	106	86	109	117	140	96	113	134	100	125	135	132	132	121	101	180	124	121	157	130	144	129	142	126	106	115	78	164	91	162	114	116	108	112	78
20140206	22	117	93	139	121	128	111	139	113	88	161	158	130	164	116	80	86	122	117	108	81	124	140	107		103	105	80	85		124	117	99	127	122	109
20140207	22	89	85	85	84	81	89	135	133	119	101	99	88	90	84	99	103	126	110	101	144	137	139	111	128	103	147	128	98	71	71	109	83	92	88	86
20140208	22	4	3	6	7	4	6	6	10	12	8	10	10	3	6	6	9	6	10	10	4	13	8	6	3	9	3	4	6	7	6	9	7	7	7	8
20140209	22	16	13	16	14	14	10	17	20	13	26	26	11	58	50	32	23	24	15	7	18	26	5	20	13	11	3	24	66		96	17	15	18	18	17
20140210	22	59	45	59	60	53	54	68	61	54	76	82	80	87	57	74	52	61	51	70	100	53	69	48	57	39	45	46	84	78	128	67	55	57	61	47
20140211	22	183	176	154	191	140	165	190	173	126	221	204	199	185	194	162	224	240	118		208	126	169	128	127	120	57	136	144		209	201	179	156	196	162
20140212	22	136	140	111	127	136	136	116	149	85	118	133	129	126	129	193	241	220	126	101	219	105	116	123	143	79	33	186	239	200	198	140	133	112	131	141
20140213	22	227	241	259	276	223	216	279	234	218	237	277	228	254	244	281	264	218	236	248	167	213	217	231	217	208	184	121	226	236	286	249	243	237	240	203
20140214	22	684	429	539	597	481	570	527	382	280	596	360	770	560	715	451	746	515	283	399	432	350	515	271	308	258	250	307	578		450	484	564	507	575	506
20140215	22	473	417	500	467	481	412	493	415	449	561	472	540	532	469	519	549	438	390	429	383	441	474	399	447	389	520	326	555	389	438	469	443	487	453	406
[truncated: 6,641 more rows]
